# Supplementary material for: Multiple short windows of calcium-dependent protein kinase 4 activity coordinate distinct cell cycle events during Plasmodium gametogenesis
Source: eLife. 2017 May 8;6:e26524. doi: 10.7554/eLife.26524 (PMC5457135; doi:10.7554/eLife.26524)
Supplement: Supplementary file 1. — DOI: http://dx.doi.org/10.7554/eLife.26524.014 [file elife-26524-supp1.xlsx]

## Sheet: Data
ID	Name	Description	CDPK4-3xHA 0 sec	CDPK4-3xHA 15 sec	CDPK4-3xHA 15 sec + 1294	CDPK4-3xHA 10 min	CDPK4-2xmyc 0 sec	CDPK4-2xmyc 15 sec	CDPK4-2ymc 15 sec +1294	CDPK4-2xmyc 10 min	CDPK4G2A-2xmyc 0 sec	MCM5-3xHA 0 sec	SOC1-3xHA 0 sec	WT
PBANKA_010080		conserved Plasmodium protein, unknown function	9	13	6	2	3	5	2	3	3	0	0	0
PBANKA_010270		conserved Plasmodium protein, unknown function	1	1	1	2	4	5	3	2	4	0	0	0
PBANKA_010330		conserved Plasmodium protein, unknown function	8	9	8	0	0	5	0	2	2	12	0	0
PBANKA_010390		RNA-binding protein, putative	5	5	4	2	6	4	4	4	3	14	4	0
PBANKA_010440		nucleoside diphosphate kinase, putative	2	3	1	0	2	5	5	0	3	8	0	0
PBANKA_010540		coatomer alpha subunit, putative	0	1	0	8	3	5	6	11	4	0	2	0
PBANKA_010710		proteasome subunit alpha type-2, putative	0	1	1	2	0	0	0	2	0	5	0	0
PBANKA_010730		chaperone, putative	4	6	5	3	4	0	3	3	2	11	0	0
PBANKA_010740	OAT	ornithine aminotransferase, putative (OAT)	0	0	0	1	0	0	0	4	2	0	0	0
PBANKA_010880		histone H3, putative	2	4	3	2	0	0	0	1	0	0	2	0
PBANKA_010910	TK	transketolase, putative (TK)	9	7	8	0	0	0	2	0	0	0	0	0
PBANKA_020250		replication factor c protein, putative	2	4	0	0	2	3	2	0	4	6	0	0
PBANKA_020270		kinesin-8, putative	18	15	12	4	17	16	17	8	13	17	3	0
PBANKA_020300		chromatin assembly factor 1 protein WD40 domain, putative	7	7	4	4	5	5	3	3	6	13	5	0
PBANKA_020630	CEN1	centrin-1, putative (CEN1)	0	0	0	1	0	0	0	2	0	5	0	0
PBANKA_020700	SERCA6	calcium-transporting ATPase, putative (SERCA)	24	31	31	8	5	5	10	9	7	12	0	0
PBANKA_021060		ubiquitin carboxyl-terminal hydrolase, putative	5	7	2	0	0	0	0	0	0	0	0	0
PBANKA_021190		cation transporting ATPase, putative	3	3	4	0	0	0	0	0	0	0	0	0
PBANKA_021400		dynein heavy chain, putative	5	4	4	19	5	0	2	20	0	31	0	0
PBANKA_030130		conserved Plasmodium protein, unknown function	10	13	11	1	2	0	0	2	0	0	0	0
PBANKA_030180		conserved Plasmodium protein, unknown function	5	8	5	0	3	0	3	0	3	0	0	0
PBANKA_030330		conserved Plasmodium protein, unknown function	2	1	1	0	4	3	3	0	4	0	0	0
PBANKA_030360	RPN1	26S proteasome regulatory subunit RPN1, putative (RPN1)	6	8	6	2	0	0	0	1	0	0	0	0
PBANKA_030500	SERA2	serine repeat antigen 2 (SERA2)	0	0	0	0	0	0	0	0	0	7	0	0
PBANKA_030680	UAP56	ATP-dependent RNA helicase UAP56, putative (UAP56)	6	10	9	7	8	2	7	6	6	15	2	0
PBANKA_030710		conserved Plasmodium protein, unknown function	11	15	11	0	0	3	2	0	4	5	0	0
PBANKA_030780		conserved Plasmodium protein, unknown function	0	0	0	0	0	0	0	0	0	5	0	0
PBANKA_030860		asparagine--tRNA ligase, putative	4	5	4	2	2	4	2	4	3	10	0	0
PBANKA_030910		peptide chain release factor subunit 1, putative	0	0	0	0	0	0	0	0	0	4	0	0
PBANKA_031000		heat shock 40 kDa protein, putative	11	14	12	0	0	0	3	2	0	0	0	0
PBANKA_031050		conserved Plasmodium protein, unknown function	6	6	5	0	4	6	4	2	2	4	0	0
PBANKA_031090		T-complex protein 1, putative	16	15	15	4	3	3	5	6	7	15	2	0
PBANKA_031100	SEC31	protein transport protein SEC31, putative (SEC31)	5	5	3	7	3	0	0	7	2	14	6	0
PBANKA_031240		DNA-directed RNA polymerase II second largest subunit, putative	1	7	2	0	2	0	3	0	2	0	0	0
PBANKA_031250	ORC5	origin recognition complex subunit 5, putative (ORC5)	11	22	9	2	3	15	9	3	3	5	0	0
PBANKA_031380		ATP synthase F1, alpha subunit, putative	0	0	0	0	0	0	0	0	0	7	0	0
PBANKA_031420	CDPK1	calcium-dependent protein kinase 1 (CDPK1)	19	20	15	7	4	3	6	12	8	9	0	0
PBANKA_031470		replication factor C subunit 2, putative	4	4	4	3	6	3	5	2	4	9	3	0
PBANKA_031600		replication factor C subunit 1, putative	18	25	17	5	13	9	10	4	11	20	9	0
PBANKA_040110	SRPK1	serine/threonine protein kinase, putative (SRPK1)	6	3	3	0	0	0	0	0	0	0	0	0
PBANKA_040150		exportin-1, putative	7	8	5	5	3	3	3	3	2	7	0	0
PBANKA_040180		HAD superfamily protein, putative	7	6	3	0	0	0	0	0	0	0	0	0
PBANKA_040210		spindle pole body protein, putative	7	11	11	0	2	4	5	0	3	6	0	0
PBANKA_040280		EH (Eps15 homology) protein, putative	1	1	1	0	0	0	0	2	0	4	0	0
PBANKA_040380		conserved Plasmodium membrane protein, unknown function	8	6	5	2	0	0	0	2	0	0	0	0
PBANKA_040400		conserved Plasmodium protein, unknown function	6	6	3	1	0	0	0	2	0	0	0	0
PBANKA_040430		P-loop containing nucleoside triphosphate hydrolase, putative	2	3	1	1	2	4	4	2	4	5	0	0
PBANKA_040460	AHA1	activator of Hsp90 ATPase, putative (AHA1)	3	4	4	0	0	0	0	0	0	0	0	0
PBANKA_040470	GRX1	glutaredoxin 1, putative (GRX1)	3	10	4	3	2	0	2	2	2	0	0	0
PBANKA_040480		FAD-dependent glycerol-3-phosphate dehydrogenase, putative	0	0	0	0	0	0	0	0	0	4	0	0
PBANKA_040520		T-complex protein beta subunit, putative	14	13	11	5	7	5	5	4	4	19	2	0
PBANKA_040560		EB1 homolog, putative	0	0	0	0	2	3	0	0	2	4	0	0
PBANKA_040620		conserved Plasmodium protein, unknown function	3	2	4	0	4	2	7	0	2	11	0	0
PBANKA_040650		TCP-1/cpn60 chaperonin, putative	11	12	9	1	0	0	2	5	0	0	2	0
PBANKA_040680	PRPF19	pre-mRNA-processing factor 19, putative (PRPF19)	0	0	0	2	4	3	3	2	0	7	5	0
PBANKA_040740	ARK2	serine/threonine protein kinase, putative (ARK2)	13	12	12	0	2	3	4	0	2	0	0	0
PBANKA_040760		asparagine synthetase, putative	8	10	6	3	2	0	2	4	0	10	0	0
PBANKA_040840		phosphoglycerate mutase, putative	7	9	7	18	2	0	0	0	0	0	0	2
PBANKA_041130		conserved Plasmodium protein, unknown function	0	0	2	1	3	4	5	3	4	0	0	0
PBANKA_041210	PPP6	serine/threonine protein phosphatase 6 (PPP6)	0	0	0	0	0	0	0	0	0	0	22	0
PBANKA_041280	eIF4E	translation initiation factor 4E, putative (eIF4E)	0	0	0	3	2	3	0	5	2	8	2	0
PBANKA_041550	SEC27	beta subunit of coatomer complex, putative (SEC27)	0	0	0	4	3	3	0	4	0	0	0	0
PBANKA_041580		conserved Plasmodium protein, unknown function	5	4	4	0	2	5	2	0	3	5	0	0
PBANKA_041610		dynein heavy chain, putative	35	47	27	18	26	28	31	27	32	56	0	0
PBANKA_041660		replication protein A1, small fragment	13	14	12	6	4	5	6	8	7	10	6	0
PBANKA_041770		alpha tubulin 1	45	49	38	0	2	0	2	0	3	44	0	0
PBANKA_041780		conserved Plasmodium protein, unknown function	2	1	1	0	0	0	0	0	0	0	0	6
PBANKA_041800		DEAD/DEAH box helicase, putative	1	4	4	0	0	0	0	0	0	0	0	0
PBANKA_050130		DNA polymerase delta catalytic subunit, putative	10	11	9	3	7	7	8	2	6	12	5	0
PBANKA_050360		60S ribosomal protein L30e, putative	2	2	3	3	0	2	4	1	2	0	4	0
PBANKA_050510	ARF1	ADP-ribosylation factor, putative (ARF1)	0	0	0	4	0	0	3	2	0	5	0	0
PBANKA_050670		citrate synthase, mitochondrial precursor, putative	0	0	0	0	0	0	0	0	0	4	0	0
PBANKA_050730		dynein heavy chain, putative	17	18	13	15	15	15	24	20	23	36	2	0
PBANKA_050810	CHD1	chromodomain-helicase-DNA-binding protein 1, putative (CHD1)	6	3	2	0	0	0	0	0	0	0	0	0
PBANKA_051190	RPL3	60S ribosomal protein L3, putative (RPL3)	0	0	0	5	3	2	5	5	3	0	5	0
PBANKA_051390	ORC3	conserved Plasmodium protein, unknown function	3	28	7	0	3	11	3	3	1	3	0	0
PBANKA_051590	DCP1	mRNA-decapping enzyme subunit 1, putative (DCP1)	0	0	0	2	2	4	0	1	0	4	0	0
PBANKA_051990		conserved Plasmodium protein, unknown function	3	6	7	4	4	3	3	8	3	10	0	0
PBANKA_052020		ADP/ATP transporter on adenylate translocase, putative	0	0	0	0	3	3	2	2	0	0	2	4
PBANKA_052270		alpha tubulin 2	58	62	49	15	15	17	16	12	19	53	27	0
PBANKA_052290	BRR2	pre-mRNA-splicing helicase BRR2, putative (BRR2)	1	1	0	0	2	0	0	0	0	13	0	0
PBANKA_052310		eukaryotic initiation factor, putative	0	1	0	0	0	0	0	0	0	6	0	0
PBANKA_060120		dynein heavy chain, putative	0	1	0	0	8	7	6	0	9	11	0	0
PBANKA_060200	ORC1	origin recognition complex subunit 1, putative (ORC1)	8	31	11	3	3	12	7	4	3	3	0	0
PBANKA_060270	NAPL	nucleosome assembly protein, putative (NAPL)	3	3	1	7	2	2	3	4	2	0	2	0
PBANKA_060420		zinc finger protein, putative	4	6	4	0	0	0	0	1	0	0	0	0
PBANKA_060430		conserved Plasmodium protein, unknown function	22	23	17	3	6	6	5	6	4	8	7	0
PBANKA_060480		eukaryotic translation initiation factor 3 subunit 8, putative	4	3	1	5	0	4	3	6	3	0	3	0
PBANKA_060530		eukaryotic translation initiation factor 5, putative	8	12	8	0	0	0	0	0	0	0	0	0
PBANKA_060540		conserved Plasmodium protein, unknown function	4	4	5	0	0	0	0	0	0	0	0	0
PBANKA_060560		conserved Plasmodium protein, unknown function	0	1	1	4	4	0	6	1	3	0	0	0
PBANKA_060740		protein phosphatase, putative	11	20	9	6	13	12	12	2	12	14	4	0
PBANKA_060780	CIA1	cytosolic iron-sulfur protein assembly protein 1, putative (CIA1)	3	4	1	0	0	0	0	0	0	0	0	0
PBANKA_060790	PDEalpha	3',5'-cyclic nucleotide phosphodiesterase, putative	3	4	5	0	0	0	0	0	0	0	0	0
PBANKA_060990		heat shock protein DNAJ homologue Pfj4, putative	0	2	0	3	2	0	0	2	3	0	0	4
PBANKA_061020	MCM5	DNA replication licensing factor MCM5, putative (MCM5)	44	53	40	7	17	16	20	8	13	20	9	0
PBANKA_061030		polyubiquitin, putative	7	5	8	3	3	0	3	3	3	0	0	0
PBANKA_061040		ATPase, putative	6	6	8	0	0	0	0	0	0	0	0	0
PBANKA_061090		HSP40, subfamily A, putative	25	43	25	12	15	18	17	12	14	0	16	0
PBANKA_061160	SOC7	ribonucleoside-diphosphate reductase, large subunit, putative	31	32	39	7	8	7	9	5	7	16	0	0
PBANKA_061220		conserved Plasmodium protein, unknown function	1	5	3	0	3	3	0	0	0	0	0	0
PBANKA_061230		conserved Plasmodium protein, unknown function	3	7	6	2	2	2	2	0	0	0	0	0
PBANKA_061320		DNA polymerase alpha, putative	28	38	28	2	10	10	8	4	7	8	5	0
PBANKA_061520	CDPK4	calcium-dependent protein kinase 4 (CDPK4)	238	255	207	22	21	24	25	23	24	19	6	0
PBANKA_061540		serine--tRNA ligase, putative	11	7	7	0	0	0	0	0	0	0	0	0
PBANKA_061570		dynein heavy chain, putative	2	1	1	0	2	3	3	0	4	11	0	0
PBANKA_061670	NEK4	NIMA related kinase 4 (NEK4)	5	6	5	4	2	2	0	2	0	0	0	0
PBANKA_061890		conserved Plasmodium protein, unknown function	0	2	0	0	0	0	0	0	0	4	0	0
PBANKA_061920	PSOP1	secreted ookinete protein, putative (PSOP1)	0	0	0	2	0	2	4	5	0	0	4	0
PBANKA_062130		conserved Plasmodium protein, unknown function	3	3	1	0	5	0	3	0	2	4	0	0
PBANKA_070200		conserved Plasmodium protein, unknown function	1	0	0	0	7	5	2	0	4	3	0	0
PBANKA_070280		protein disulfide isomerase	2	3	0	3	0	3	2	5	2	0	0	0
PBANKA_070390	RACK	receptor for activated c kinase, putative (RACK)	2	3	2	3	4	2	2	5	4	0	4	0
PBANKA_070410	UBE4B	ubiquitin conjugation factor E4 B, putative (UBE4B)	5	4	4	0	0	0	0	0	0	0	0	0
PBANKA_070450		E3 ubiquitin-protein ligase, putative	10	8	9	0	0	0	0	0	0	0	0	0
PBANKA_070470		conserved Plasmodium protein, unknown function	19	21	12	7	2	4	2	7	0	17	0	0
PBANKA_070640	SOC4	conserved Plasmodium protein, unknown function	8	10	5	0	0	0	3	0	0	4	0	0
PBANKA_070800	SEC23	protein transport protein SEC23, putative (SEC23)	0	1	1	3	2	2	0	4	0	0	3	0
PBANKA_070940		conserved Plasmodium protein, unknown function	5	4	6	0	0	0	0	0	0	0	0	0
PBANKA_071100		conserved Plasmodium protein, unknown function	2	1	2	0	2	0	2	0	0	5	0	0
PBANKA_071190	HSP70	heat shock protein 70 (HSP70)	168	204	142	26	23	26	26	0	25	0	44	43
PBANKA_071210		DNA helicase, putative	29	38	25	1	8	6	5	2	5	8	0	0
PBANKA_071260	14-3-3I	14-3-3 protein (14-3-3I)	39	52	32	10	10	9	11	0	9	0	10	8
PBANKA_071390	AK2	adenylate kinase 2, putative (AK2)	1	2	2	0	2	0	0	0	3	7	0	0
PBANKA_071600		chromosome associated protein, putative	6	11	5	5	6	8	5	4	2	0	0	0
PBANKA_071780		60S ribosomal protein L15, putative	0	0	0	5	3	2	2	4	0	0	3	0
PBANKA_071880	SAR1	small GTP-binding protein sar1, putative (SAR1)	0	0	0	4	0	0	0	4	0	4	0	0
PBANKA_071930	DHFR-TS	bifunctional dihydrofolate reductase-thymidylate synthase, putative (DHFR-TS)	3	6	2	0	0	0	0	0	0	0	0	0
PBANKA_071970		conserved Plasmodium protein, unknown function	0	1	3	3	5	7	4	2	7	5	0	0
PBANKA_072000		conserved Plasmodium protein, unknown function	8	8	6	0	0	0	0	0	0	0	0	0
PBANKA_072020	SOC1	conserved Plasmodium protein, unknown function	6	3	3	0	3	0	0	0	0	0	35	0
PBANKA_072170		ran binding protein 1, putative	3	4	1	0	0	0	0	0	0	0	0	0
PBANKA_080120		erythrocyte membrane-associated antigen, putative	12	15	12	4	2	3	4	5	3	10	0	0
PBANKA_080150		conserved Plasmodium protein, unknown function	9	10	7	1	5	7	6	5	5	7	2	0
PBANKA_080230		E3 ubiquitin-protein ligase, putative	4	10	7	1	0	3	0	2	0	0	0	0
PBANKA_080300	ORC2	origin recognition complex subunit 2, putative (ORC2)	6	39	13	3	4	10	5	2	2	5	0	0
PBANKA_080310	MCM7	DNA replication licensing factor MCM7, putative (MCM7)	28	32	23	8	16	20	13	7	15	15	11	0
PBANKA_080360		importin-7, putative	3	6	4	0	4	7	2	0	3	0	0	0
PBANKA_080430	MSH2-2	DNA mismatch repair protein MSH2 (MSH2-2)	14	20	14	3	9	7	12	8	10	8	4	0
PBANKA_080570	HSP90	heat shock protein 90, putative (HSP90)	81	94	62	20	19	21	16	18	20	0	20	0
PBANKA_080590		kinesin-8, putative	3	4	4	0	0	0	0	0	0	0	0	0
PBANKA_080760	RPS11	40S ribosomal protein S11, putative (RPS11)	3	5	4	4	3	3	3	4	4	0	2	2
PBANKA_080790		conserved Plasmodium protein, unknown function	1	2	0	0	2	5	0	0	3	5	0	0
PBANKA_081050	ARP	apoptosis-related protein, putative (ARP)	6	4	4	0	0	0	0	0	0	0	0	0
PBANKA_081130		Ran-binding protein, putative	4	8	8	3	7	8	7	6	7	13	2	0
PBANKA_081200		DNA primase large subunit, putative	10	10	11	0	3	2	5	0	0	0	2	0
PBANKA_081420		elongation factor 1-beta, putative	10	8	6	3	0	0	0	4	0	0	2	0
PBANKA_081620		ribonuclease H2 subunit C, putative	4	2	1	0	0	0	0	2	0	0	0	0
PBANKA_081640	PFK9	6-phosphofructokinase, putative (PFK9)	27	35	27	11	15	19	16	15	13	28	10	0
PBANKA_081800		conserved Plasmodium protein, unknown function	4	7	3	0	0	0	0	0	0	0	0	0
PBANKA_081850		conserved Plasmodium protein, unknown function	10	13	13	0	0	2	3	0	0	4	0	0
PBANKA_081890	BiP	heat shock protein 70, putative	17	15	17	10	6	5	8	0	6	0	12	25
PBANKA_081990	NAPS	nucleosome assembly protein (NAPS)	13	18	5	3	6	6	5	6	4	5	8	0
PBANKA_082070		TLD domain-containing protein	1	3	5	2	0	0	2	0	0	0	0	0
PBANKA_082290		conserved Plasmodium protein, unknown function	1	1	3	2	2	3	3	1	4	0	0	0
PBANKA_082300		ubiquitin-like protein, putative	14	16	11	3	4	4	3	6	7	15	0	0
PBANKA_082340	PGK	phosphoglycerate kinase, putative (PGK)	20	19	22	7	8	7	9	14	7	22	4	0
PBANKA_082470	TRXR	thioredoxin reductase, putative (TRXR)	2	4	2	1	0	0	0	2	0	0	0	0
PBANKA_082480		RNA-binding protein, putative	0	0	0	2	0	0	0	1	0	4	0	0
PBANKA_082670		conserved Plasmodium protein, unknown function	0	0	0	0	0	0	0	0	0	6	0	0
PBANKA_082800		zinc finger protein, putative	8	7	6	3	2	0	0	5	0	0	0	0
PBANKA_083000		RNA-binding protein, putative	6	4	3	0	0	0	0	0	0	5	0	0
PBANKA_083360		conserved Plasmodium protein, unknown function	5	7	8	0	2	2	3	2	0	4	0	0
PBANKA_083430		gamma-tubulin complex component, putative	0	0	0	0	5	3	2	0	2	0	0	0
PBANKA_083680	EMAP1	erythrocyte membrane associated protein 1 (EMAP1)	0	0	0	2	0	0	0	2	0	5	0	0
PBANKA_090360	DYN1	dynamin-like protein, putative (DYN1)	16	16	11	18	11	10	12	17	11	21	14	0
PBANKA_090640		60S ribosomal protein L35ae, putative	6	6	8	0	0	0	0	0	0	0	0	0
PBANKA_090690		conserved Plasmodium protein, unknown function	2	2	0	5	12	10	7	6	8	0	0	0
PBANKA_090850		myosin heavy chain subunit, putative	5	8	2	0	3	0	0	0	5	0	0	0
PBANKA_090880		conserved Plasmodium protein, unknown function	7	10	10	0	3	2	2	0	3	3	0	0
PBANKA_090960	ApiAP2	transcription factor with AP2 domain(s), putative (ApiAP2)	2	5	3	0	0	2	0	0	0	0	0	0
PBANKA_091020		protein phosphatase 2C, putative	3	16	5	0	0	0	0	0	0	0	0	0
PBANKA_091110		conserved Plasmodium protein, unknown function	0	0	0	0	0	0	4	4	4	0	0	0
PBANKA_091210	CK1	casein kinase 1 (CK1)	2	3	1	6	6	4	7	7	7	0	2	0
PBANKA_091230	TSN	tudor staphylococcal nuclease, putative (TSN)	4	5	3	4	2	0	3	6	0	14	0	0
PBANKA_091300		conserved Plasmodium protein, unknown function	13	19	14	0	2	3	3	0	2	0	0	0
PBANKA_091440	UIS24	heat shock protein 70, putative (UIS24)	0	0	0	3	0	0	0	2	0	21	0	0
PBANKA_091610		nucleic acid binding protein, putative	7	9	7	0	0	0	0	0	0	0	0	0
PBANKA_091620		TCP-1/cpn60 chaperonin family, putative	17	19	13	7	8	8	7	6	4	0	3	0
PBANKA_091740	PF16	armadillo repeat protein PF16 (PF16)	5	6	5	8	9	8	7	8	12	9	3	0
PBANKA_091750		structural maintenance of chromosome protein, putative	14	13	11	3	7	7	7	7	5	12	0	0
PBANKA_091760		structural maintenance of chromosome protein, putative, fragment	8	9	5	0	0	0	0	0	0	0	0	0
PBANKA_091800		60S acidic ribosomal protein P0, putative	3	3	3	0	0	0	0	0	0	0	7	0
PBANKA_091910	PV1	parasitophorous vacuolar protein 1, putative (PV1)	1	1	1	0	0	0	0	0	0	5	0	0
PBANKA_091990		6-phosphofructokinase, putative	1	4	3	6	0	0	0	8	0	0	0	0
PBANKA_092000		multiprotein bridging factor type 1, putative	0	4	1	2	0	0	0	2	0	0	0	0
PBANKA_092080		CRAL/TRIO domain-containing protein, putative	6	8	9	0	0	0	0	0	0	5	0	0
PBANKA_092250		conserved Plasmodium protein, unknown function	5	3	3	3	0	0	0	1	0	0	0	12
PBANKA_092490		translation elongation factor EF-1, subunit alpha, putative	8	7	7	4	2	0	0	5	0	0	0	0
PBANKA_092540		dynein heavy chain, putative	51	48	38	14	23	27	21	22	26	49	4	0
PBANKA_092770		conserved Plasmodium protein, unknown function	6	9	7	1	2	3	0	2	4	0	2	0
PBANKA_093030		GTP-binding nuclear protein RAN/TC4, putative	3	10	6	7	7	8	3	11	5	9	6	0
PBANKA_093370	MAPK2	mitogen-activated protein kinase 2 (MAPK2)	1	1	0	0	0	0	0	0	2	5	0	0
PBANKA_093420	DSK2	ubiquitin domain-containing protein DSK2, putative (DSK2)	0	0	0	0	0	0	0	0	0	5	0	0
PBANKA_093470		conserved Plasmodium protein, unknown function	0	1	1	0	0	0	2	0	2	4	0	0
PBANKA_093650	RFC5	replication factor C subunit 5, putative (RFC5)	3	1	1	1	0	3	2	3	3	7	3	0
PBANKA_093720.2		asparagine-rich antigen, putative	10	7	9	0	0	0	0	0	0	0	0	0
PBANKA_093900		ion channel protein, putative	19	21	18	7	0	0	7	5	9	0	0	0
PBANKA_093930		conserved Plasmodium protein, unknown function	3	1	1	2	6	5	7	3	5	5	0	0
PBANKA_093960	PAIP1	polyadenylate-binding protein-interacting protein 1, putative (PAIP1)	7	5	6	6	7	0	3	8	3	11	5	0
PBANKA_094150		40S ribosomal protein S4, putative	0	0	0	5	5	5	7	5	4	0	2	0
PBANKA_094180	H2B	histone H2B, putative (H2B)	2	2	5	4	4	4	4	5	4	5	2	0
PBANKA_094190		histone H4, putative	0	2	0	8	9	7	8	11	9	0	3	0
PBANKA_094230		radial spoke head protein, putative	4	3	2	0	0	0	2	2	0	0	0	0
PBANKA_094240		conserved Plasmodium protein, unknown function	1	2	1	4	3	2	4	3	5	6	0	0
PBANKA_094310	NOT1	CCR4-NOT transcription complex subunit 1, putative (NOT1)	10	7	4	8	3	6	3	6	3	13	0	0
PBANKA_100060		erythrocyte membrane antigen 1	0	0	0	1	0	0	0	0	0	4	0	0
PBANKA_100310	PRPF8	pre-mRNA-processing-splicing factor 8, putative (PRPF8)	1	1	1	0	0	3	2	0	0	10	0	0
PBANKA_100340	UIS14	lysine decarboxylase, putative (UIS14)	2	1	2	3	12	12	12	6	10	0	0	0
PBANKA_100580		conserved Plasmodium protein, unknown function	0	0	0	0	4	5	5	4	3	0	0	0
PBANKA_100610	FEN1	flap endonuclease 1, putative (FEN1)	3	6	3	3	4	3	3	1	0	4	0	0
PBANKA_100800		conserved Plasmodium protein, unknown function	1	0	0	0	0	0	0	0	0	4	0	0
PBANKA_100880		glucose-6-phosphate isomerase, putative	2	5	2	0	0	0	2	3	0	0	0	0
PBANKA_100910		ataxin-2 like protein, putative	3	4	0	3	0	0	0	4	0	0	0	0
PBANKA_100950		NAD(P)H-dependent glutamate synthase, putative	15	15	9	3	0	2	0	4	0	13	0	0
PBANKA_101050	HOP	Hsp70/Hsp90 organizing protein, putative (HOP)	19	19	7	4	6	6	5	8	7	0	6	0
PBANKA_101140		DNA topoisomerase II, putative	24	28	22	4	16	11	12	1	7	11	0	0
PBANKA_101320		ATP-specific succinyl-CoA synthetase beta subunit, putative	0	0	0	0	0	0	0	3	0	7	0	0
PBANKA_101490		coatamer protein, beta subunit, putative	2	2	0	3	3	2	3	4	2	0	0	0
PBANKA_101670		conserved Plasmodium protein, unknown function	7	10	8	3	2	3	4	3	3	4	2	0
PBANKA_101790	PEPC	phosphoenolpyruvate carboxylase (PEPC)	5	6	4	0	2	3	3	2	0	0	0	0
PBANKA_101830		dynein-associated protein, putative	5	5	4	4	2	7	5	2	5	9	0	0
PBANKA_101940		60S ribosomal protein L7-3, putative	0	0	0	3	4	5	4	4	5	0	0	0
PBANKA_101950		60S ribosomal protein L5, putative	2	1	1	1	3	3	2	4	3	0	2	0
PBANKA_101970		conserved Plasmodium protein, unknown function	10	8	5	6	5	4	4	9	3	0	2	0
PBANKA_102300		conserved Plasmodium protein, unknown function	4	3	3	1	0	0	0	2	0	0	0	0
PBANKA_102490	MCM2	DNA replication licensing factor MCM2, putative (MCM2)	39	55	36	11	24	28	23	14	22	26	10	0
PBANKA_102550		NOT family protein, putative	0	4	0	3	0	0	0	3	0	0	0	0
PBANKA_102660		GTP-binding protein, putative	6	7	7	4	0	0	3	7	3	0	0	0
PBANKA_102830	PP1	serine/threonine protein phosphatase PP1 (PP1)	5	3	4	0	0	2	0	0	0	4	0	0
PBANKA_102960		conserved Plasmodium protein, unknown function	1	5	3	2	3	3	3	0	3	0	0	0
PBANKA_103010		actin II	7	14	7	0	3	4	4	0	4	21	4	0
PBANKA_103050		conserved Plasmodium protein, unknown function	2	6	2	0	0	0	0	0	0	0	0	0
PBANKA_103060		p1/s1 nuclease, putative	0	0	0	0	0	0	0	0	0	5	0	0
PBANKA_103270	HoBo	RNA binding protein Bruno, putative (HoBo)	6	6	4	11	2	3	3	7	2	0	6	2
PBANKA_103370		conserved Plasmodium protein, unknown function	0	1	1	1	6	5	2	3	5	7	0	0
PBANKA_103390		40S ribosomal protein S8e, putative	0	0	0	4	4	4	2	2	3	0	4	1
PBANKA_103410		DNA repair helicase, putative	18	26	12	2	7	13	12	6	8	6	4	0
PBANKA_103570		conserved Plasmodium protein, unknown function	4	7	5	1	4	5	7	2	8	6	0	0
PBANKA_103660		ribonucleotide reductase small subunit, putative	1	4	0	0	0	0	0	0	0	0	0	0
PBANKA_103790		conserved Plasmodium protein, unknown function	5	6	3	1	0	0	0	2	0	0	0	0
PBANKA_103820	MISFIT	nuclear formin-like protein (MISFIT)	6	12	8	0	2	3	2	0	0	0	0	0
PBANKA_110160		chromosome assembly factor 1, putative	4	8	2	0	0	0	0	0	0	0	0	0
PBANKA_110290	CDC6	conserved Plasmodium protein, unknown function	7	13	7	3	5	11	7	1	2	10	2	0
PBANKA_110510	MSH6	DNA mismatch repair protein MSH6, putative (MSH6)	38	51	34	7	15	15	17	6	18	19	5	0
PBANKA_110540	SUMO	small ubiquitin-related modifier, putative (SUMO)	7	9	2	0	0	0	2	0	2	0	2	0
PBANKA_110670	RPL4	60S ribosomal protein L4, putative (RPL4)	8	8	7	8	5	6	5	9	5	0	3	0
PBANKA_110870		chromosome condensation protein, putative	17	18	16	5	4	9	10	7	6	7	0	0
PBANKA_111230	RAB1b	ras-related protein Rab-1B, putative (RAB1b)	2	2	1	1	0	0	0	3	0	5	0	0
PBANKA_111300	PNP	purine nucleoside phosphorylase, putative (PNP)	8	15	12	7	9	10	12	0	6	0	5	1
PBANKA_111520		conserved Plasmodium protein, unknown function	10	21	8	14	2	3	2	11	0	20	0	0
PBANKA_111680		conserved Plasmodium protein, unknown function	7	6	6	6	7	3	4	6	5	12	4	0
PBANKA_111750		ribosomal protein L27a, putative	0	0	0	2	4	3	3	2	2	0	2	2
PBANKA_111770	MDH	malate dehydrogenase, putative (MDH)	6	7	3	6	2	0	2	4	2	0	0	0
PBANKA_111860		cell division cycle protein 48 homologue, putative	28	36	27	1	6	4	2	5	3	14	0	0
PBANKA_112010		conserved Plasmodium protein, unknown function	1	6	2	3	0	0	0	2	0	0	0	0
PBANKA_112170		leucine--tRNA ligase, putative	16	19	13	4	2	2	3	3	4	0	0	1
PBANKA_112200		coronin binding protein, putative	0	0	0	0	2	2	2	0	0	4	0	0
PBANKA_112350	ISWI	SNF2 helicase, putative (ISWI)	16	16	13	0	4	3	4	0	2	8	3	0
PBANKA_112530		conserved Plasmodium protein, unknown function	0	1	0	3	3	6	8	0	7	0	0	0
PBANKA_112560		pyruvate kinase, putative	12	10	7	14	19	17	15	16	16	31	19	0
PBANKA_112640		transportin, putative	10	8	7	3	0	2	0	2	0	9	2	0
PBANKA_112770	NAPRT	nicotinate phosphoribosyltransferase, putative (NAPRT)	14	14	9	2	0	0	0	0	0	0	0	0
PBANKA_112910		DNA polymerase epsilon, catalytic subunit a, putative	26	25	21	2	7	14	13	3	14	15	6	0
PBANKA_112960		conserved Plasmodium protein, unknown function	1	5	1	0	3	4	3	0	3	3	0	0
PBANKA_113050		proteasome subunit alpha type-7, putative	0	0	0	0	0	0	0	0	0	8	0	0
PBANKA_113160	MCM6	DNA replication licensing factor MCM6, putative (MCM6)	29	40	22	9	17	20	19	8	22	20	8	0
PBANKA_113190	PP5	serine/threonine protein phosphatase 5 (PP5)	1	4	1	0	5	2	0	0	3	0	0	0
PBANKA_113330	EF-1alpha	elongation factor 1-alpha (EF-1alpha)	50	48	40	14	13	11	14	14	15	0	14	0
PBANKA_113340	EF-1alpha	elongation factor 1-alpha (EF-1alpha)	50	48	40	0	0	0	0	0	0	0	0	0
PBANKA_113380		DNA helicase, putative	4	2	1	0	0	0	2	0	2	0	0	0
PBANKA_113410		TCP-1/cpn60 chaperonin, putative	4	4	2	5	6	5	3	5	5	22	3	0
PBANKA_113570		RNA-binding protein, putative	7	11	12	3	3	4	4	5	4	10	2	0
PBANKA_113610		conserved Plasmodium protein, unknown function	4	5	5	0	0	0	0	0	0	0	0	0
PBANKA_113720	SEC24A	protein transport protein Sec24A, putative (SEC24A)	3	4	2	0	0	0	0	0	0	0	3	0
PBANKA_113780	GAC	conserved Plasmodium protein, unknown function	48	55	41	24	21	19	17	21	22	52	7	0
PBANKA_113790	PCNA	proliferating cell nuclear antigen, putative (PCNA)	6	6	5	3	3	2	3	2	2	4	2	0
PBANKA_113820	RUVB3	RuvB-like helicase 3, putative (RUVB3)	8	7	3	3	4	3	5	5	5	11	4	0
PBANKA_113880		conserved Plasmodium protein, unknown function	2	25	4	0	0	0	0	0	0	0	0	0
PBANKA_113940	DOA1	polyubiquitin binding protein, putative (DOA1)	4	5	4	2	2	0	2	2	2	5	0	0
PBANKA_114170		ubiquitin-60S ribosomal protein L40, putative	7	5	8	0	0	0	0	0	0	0	0	0
PBANKA_114280		conserved Plasmodium protein, unknown function	7	6	4	2	2	3	3	3	2	0	0	0
PBANKA_120060		Plasmodium exported protein, unknown function	0	0	0	4	3	2	0	5	0	0	0	0
PBANKA_120110		conserved Plasmodium protein, unknown function	5	3	1	2	0	0	0	5	0	0	0	0
PBANKA_120210		conserved Plasmodium protein, unknown function	2	2	1	4	0	0	0	6	0	0	0	0
PBANKA_120220		U5 small nuclear ribonuclear protein, putative	0	1	0	2	0	0	0	3	0	11	0	0
PBANKA_120270		RNA-binding protein, putative	1	0	0	6	4	6	6	3	2	4	0	0
PBANKA_120420		conserved Plasmodium protein, unknown function	6	3	2	2	0	0	0	2	2	0	0	0
PBANKA_120440	ALBA3	DNA/RNA-binding protein Alba 3, putative (ALBA3)	3	6	4	5	5	3	2	6	2	0	4	2
PBANKA_120500		RNA-binding protein, putative	1	2	1	1	2	2	2	2	3	4	3	0
PBANKA_120610		eukaryotic translation initiation factor 3 subunit 7, putative	12	16	12	2	4	5	3	6	4	14	2	0
PBANKA_120690		tubulin beta chain, putative	63	76	57	23	22	25	26	21	27	59	37	0
PBANKA_120700	NOP5	nucleolar protein 5, putative (NOP5)	0	0	0	0	0	0	0	0	0	6	0	0
PBANKA_120940	ISP1	inner membrane complex sub-compartment protein 1 (ISP1)	0	2	1	1	0	3	2	1	4	6	0	0
PBANKA_121020	PREBP	PRE-binding protein, putative (PREBP)	3	4	1	9	6	6	5	7	3	0	2	0
PBANKA_121080	HGPRT	hypoxanthine-guanine phosphoribosyltransferase, putative (HGPRT)	0	2	0	1	6	6	3	3	5	0	13	0
PBANKA_121100	GMPS	GMP synthetase, putative (GMPS)	6	6	6	2	2	4	2	3	2	9	0	0
PBANKA_121360	CysRS	cysteine--tRNA ligase, putative (CysRS)	4	1	1	1	0	0	0	3	0	0	0	0
PBANKA_121400		heat shock protein 60, putative	0	0	0	4	0	0	0	1	0	14	0	0
PBANKA_121430	ENO	enolase, putative (ENO)	7	11	12	11	6	8	8	9	8	21	9	0
PBANKA_121470		conserved Plasmodium protein, unknown function	11	22	12	12	3	0	2	15	0	17	3	0
PBANKA_121560		40S ribosomal protein S3A, putative	2	1	4	6	0	4	4	0	2	0	3	1
PBANKA_121590		conserved Plasmodium protein, unknown function	9	10	7	2	0	0	3	2	2	0	0	0
PBANKA_121650	CYP19A	peptidyl-prolyl cis-trans isomerase, putative (CYP19A)	13	22	10	0	2	3	2	0	3	0	2	0
PBANKA_121770	DOZI	ATP-dependent RNA helicase DDX6 (DOZI)	0	1	0	12	4	4	6	15	7	0	5	0
PBANKA_121820		T-complex protein 1 epsilon subunit, putative	3	7	4	3	5	4	5	5	5	7	0	0
PBANKA_121930	HSP110c	heat shock protein 110, putative (HSP110c)	35	39	34	8	8	5	6	7	3	0	6	0
PBANKA_122210		regulator of chromosome condensation, putative	1	4	0	0	0	0	0	0	0	0	0	0
PBANKA_122380		vacuolar proton translocating ATPase subunit A, putative	4	5	6	0	0	0	0	0	0	0	0	0
PBANKA_122440		ferlin, putative	2	4	2	0	0	0	0	0	0	0	0	0
PBANKA_122610		conserved Plasmodium protein, unknown function	16	22	12	2	0	0	0	1	0	0	0	0
PBANKA_122660		tubulin gamma chain, putative	4	1	1	2	0	4	2	2	3	0	0	0
PBANKA_122740	CNA	serine/threonine protein phosphatase 2B catalytic subunit A, putative (CNA)	3	7	2	0	0	0	0	0	0	0	0	0
PBANKA_122820	GDH3	glutamate dehydrogenase, putative (GDH3)	4	5	3	0	0	0	0	0	0	0	0	0
PBANKA_122900		Plasmodium exported protein, unknown function	5	4	5	4	0	0	0	0	0	0	0	24
PBANKA_123100		40S ribosomal protein S11, putative	6	12	6	4	4	4	2	3	3	0	5	9
PBANKA_123150		ubiquitin carboxyl-terminal hydrolase 2, putative	12	14	10	0	0	2	0	0	0	0	0	0
PBANKA_123160	ApiAP2	transcription factor with AP2 domain(s), putative (ApiAP2)	0	0	0	0	0	0	0	0	0	5	0	0
PBANKA_123170	RPL2	60S ribosomal protein L2, putative (RPL2)	1	1	2	4	3	2	2	4	3	0	4	0
PBANKA_123180		60S ribosomal protein L12, putative	3	3	1	2	0	2	2	2	3	0	4	0
PBANKA_123220	FACT-L	FACT complex subunit SPT16 (FACT-L)	30	40	24	6	16	15	14	7	15	23	4	0
PBANKA_123420	RPS24	40S ribosomal protein S24, putative (RPS24)	0	0	0	1	3	3	4	4	2	0	0	0
PBANKA_123450		conserved Plasmodium protein, unknown function	0	1	0	0	2	2	0	0	0	4	0	0
PBANKA_123480		40S ribosomal protein S9, putative	0	0	0	3	2	2	3	5	4	0	0	0
PBANKA_123560	SAHH	adenosylhomocysteinase, putative (SAHH)	0	0	0	5	3	0	3	0	4	0	2	0
PBANKA_123660		conserved Plasmodium protein, unknown function, fragment	1	1	1	2	5	5	7	2	4	3	0	0
PBANKA_123730		inner membrane complex protein, putative	3	4	3	0	0	0	0	0	0	0	0	0
PBANKA_123790		mitochondrial processing peptidase alpha subunit, putative	0	0	0	0	0	0	0	0	0	8	0	0
PBANKA_123880		karyopherin beta, putative	44	65	39	25	18	19	22	22	23	35	6	0
PBANKA_124180	MCM3	DNA replication licensing factor MCM3, putative (MCM3)	61	84	56	7	21	16	18	11	18	26	14	0
PBANKA_124230	HIP	Hsc70-interacting protein,58 kDa phosphoprotein (HIP)	3	2	3	1	3	4	4	5	4	0	0	0
PBANKA_124390		conserved Plasmodium protein, unknown function	3	5	3	0	0	0	0	0	3	0	0	0
PBANKA_130070	CCp1	LCCL domain-containing protein (CCp1)	0	0	0	0	0	0	0	0	0	6	0	0
PBANKA_130130	CITH	trailer hitch homolog, putative (CITH)	12	13	12	7	2	0	2	6	2	0	0	4
PBANKA_130140		proteasome subunit alpha type-1, putative	5	4	3	3	2	0	0	1	0	0	0	0
PBANKA_130260		DNA primase small subunit, putative	0	0	0	0	0	0	2	0	2	7	0	0
PBANKA_130280	TPx1	thioredoxin peroxidase 1 (TPx1)	13	9	10	6	6	5	4	0	2	0	8	2
PBANKA_130380	TIM	triosephosphate isomerase, putative (TIM)	5	4	5	3	4	7	7	4	3	4	8	0
PBANKA_130450	SOC3	conserved Plasmodium protein, unknown function	2	4	5	0	4	5	7	0	7	4	2	0
PBANKA_130530	FACT-S	FACT complex subunit SSRP1, putative (FACT-S)	12	15	9	4	7	10	11	5	9	15	2	0
PBANKA_130620		tRNA binding protein, putative	5	8	5	0	0	0	0	0	0	6	0	0
PBANKA_130680	SEC7	protein transport protein SEC7, putative (SEC7)	4	3	4	0	0	0	0	0	0	0	0	0
PBANKA_130700		conserved Plasmodium protein, unknown function	1	6	2	0	0	0	0	0	0	0	0	0
PBANKA_130800		conserved Plasmodium protein, unknown function	3	5	2	2	15	9	13	2	13	0	0	0
PBANKA_130860	ALDO2	fructose-bisphosphate aldolase 2 (ALDO2)	51	53	53	15	14	14	15	0	14	0	20	3
PBANKA_130990		M17 leucyl aminopeptidase, putative	3	3	5	0	0	0	0	0	0	5	0	0
PBANKA_131040	CEN2	centrin-2, putative (CEN2)	0	0	0	0	3	4	2	0	0	7	0	0
PBANKA_131280		conserved Plasmodium protein, unknown function	4	3	1	0	0	0	0	0	0	4	0	0
PBANKA_131480		elongation factor 2, putative	61	83	69	18	14	14	20	0	22	0	17	2
PBANKA_131550		sortilin, putative	2	3	1	0	0	0	0	0	0	4	0	0
PBANKA_131740		co-chaperone p23, putative	5	3	2	0	0	0	0	0	0	0	0	0
PBANKA_131750	G6PD-6PGL	glucose-6-phosphate dehydrogenase-6-phosphogluconolactonase (G6PD-6PGL)	12	13	12	1	2	0	0	4	2	0	0	0
PBANKA_131840		6-phosphogluconate dehydrogenase, decarboxylating, putative	14	18	13	4	13	10	12	11	12	15	5	0
PBANKA_131890		methyltransferase, putative	0	0	0	0	0	2	0	0	0	5	0	0
PBANKA_131920		AP-1 complex subunit gamma, putative	4	5	3	0	0	0	0	0	0	0	0	0
PBANKA_132010	UIS25	conserved Plasmodium protein, unknown function (UIS25)	14	15	10	6	9	15	12	8	16	8	2	0
PBANKA_132020		conserved Plasmodium protein, unknown function	4	6	4	1	4	0	0	2	4	0	0	0
PBANKA_132040		conserved Plasmodium protein, unknown function	4	4	2	0	0	0	2	0	0	0	0	0
PBANKA_132090	TRX1	thioredoxin 1, putative (TRX1)	4	8	6	1	0	0	0	2	2	3	0	0
PBANKA_132100		conserved Plasmodium protein, unknown function	0	0	0	1	2	0	0	4	0	0	0	0
PBANKA_132440	RPL27	60S ribosomal protein L27, putative (RPL27)	2	3	3	3	2	0	2	3	0	0	2	0
PBANKA_132640	GAPDH	glyceraldehyde-3-phosphate dehydrogenase, putative (GAPDH)	39	52	31	12	15	15	14	14	15	31	25	0
PBANKA_132680		replication factor C3, putative	6	6	5	5	5	7	3	4	6	6	0	0
PBANKA_132690		DNA polymerase alpha subunit, putative	1	3	2	0	0	0	0	0	0	5	0	0
PBANKA_132830		ATP-dependent zinc metalloprotease FTSH, putative	0	0	0	0	0	0	0	1	0	0	0	0
PBANKA_132920		dynein beta chain, putative	3	6	4	2	6	14	16	1	16	18	0	0
PBANKA_132930		40S ribosomal protein S3, putative	0	0	1	5	4	4	2	3	3	0	2	0
PBANKA_132970	RPN2	26S proteasome regulatory subunit RPN2, putative (RPN2)	2	8	4	0	0	0	0	3	2	0	0	0
PBANKA_133000		conserved Plasmodium protein, unknown function	2	3	2	4	3	2	4	4	2	0	2	0
PBANKA_133140		conserved Plasmodium protein, unknown function	0	3	2	5	12	5	0	7	4	0	2	0
PBANKA_133190	eIF4A	eukaryotic initiation factor 4a, putative (eIF4A)	25	29	20	6	10	10	12	0	9	0	9	6
PBANKA_133690		conserved Plasmodium protein, unknown function	5	11	7	0	4	3	2	2	0	0	0	0
PBANKA_133750		conserved Plasmodium protein, unknown function	9	11	7	0	7	10	5	0	3	5	0	0
PBANKA_133760		translation initiation factor EIF-2B subunit, putative	19	26	10	0	4	4	2	0	4	4	0	0
PBANKA_134010	LDH	L-lactate dehydrogenase (LDH)	29	30	27	8	6	6	6	8	7	0	7	6
PBANKA_134040		oxidoreductase, putative	29	32	21	7	14	11	13	10	12	25	11	0
PBANKA_134170		conserved Plasmodium protein, unknown function	8	11	6	0	0	0	2	0	0	0	0	0
PBANKA_134320		conserved Plasmodium protein, unknown function	8	19	11	2	6	9	4	1	6	0	0	0
PBANKA_134420		conserved Plasmodium protein, unknown function	4	2	2	0	2	2	4	2	3	0	0	0
PBANKA_134430		chromatin assembly factor 1 subunit, putative	7	11	7	0	4	3	4	0	2	0	0	0
PBANKA_134660		glutamine--tRNA ligase, putative	5	5	5	1	0	3	0	2	0	7	0	0
PBANKA_134770		isoleucine--tRNA ligase, putative	6	5	5	0	0	0	0	0	2	5	0	0
PBANKA_134880	ORC4	conserved Plasmodium protein, unknown function	7	23	8	0	3	10	3	0	1	0	0	0
PBANKA_134890		chaperone binding protein, putative	9	9	8	2	2	2	4	1	5	0	0	0
PBANKA_135200		elongation factor 1-gamma, putative	6	9	5	5	4	4	5	6	3	13	4	0
PBANKA_135440		60S ribosomal protein L18, putative	0	0	1	3	3	2	3	4	3	0	3	0
PBANKA_135510		40S ribosomal protein S6, putative	0	0	0	5	4	6	7	4	4	0	3	0
PBANKA_135550	CK2beta2	casein kinase II beta chain, putative (CK2beta2)	4	3	2	0	0	0	0	0	0	0	0	0
PBANKA_135630	CDT1	conserved Plasmodium protein, unknown function	14	23	12	0	8	8	6	0	4	5	0	0
PBANKA_135640	RAD5	DNA repair protein RAD5, putative (RAD5)	9	12	10	0	0	0	0	0	0	3	0	0
PBANKA_135680		conserved Plasmodium protein, unknown function	10	13	6	0	0	0	0	0	0	0	0	0
PBANKA_135780		conserved Plasmodium protein, unknown function	1	2	1	0	0	0	0	0	0	3	24	0
PBANKA_135830		conserved Plasmodium protein, unknown function	9	13	9	0	0	2	2	0	0	6	0	0
PBANKA_135880		conserved Plasmodium protein, unknown function	3	5	3	0	0	0	0	0	0	0	0	0
PBANKA_135920	ALBA2	DNA/RNA-binding protein Alba 2, putative (ALBA2)	1	2	2	3	0	0	0	5	0	0	2	0
PBANKA_135930		conserved Plasmodium protein, unknown function	5	8	6	0	0	0	0	0	0	0	0	0
PBANKA_135970	P47	6-cysteine protein (P47)	0	0	0	0	0	0	0	0	0	5	0	0
PBANKA_136030	ALBA4	DNA/RNA-binding protein Alba 4, putative (ALBA4)	2	3	2	11	4	4	4	13	4	0	4	3
PBANKA_136150		conserved Plasmodium protein, unknown function	5	7	4	2	0	2	3	2	3	9	2	0
PBANKA_136160		E1-E2 ATPase, putative	43	39	39	2	0	0	2	3	6	3	0	0
PBANKA_136200		glutamate--tRNA ligase, putative	11	10	11	3	0	0	0	2	0	0	0	0
PBANKA_136290	KRS1	lysine--tRNA ligase, putative (KRS1)	5	4	5	1	2	0	2	3	0	13	0	0
PBANKA_140130		40S ribosomal protein S7, putative	1	0	0	1	3	0	0	2	3	0	4	0
PBANKA_140260		DNA ligase I, putative	11	13	12	3	3	5	9	2	4	12	0	0
PBANKA_140490	RPT4	26S protease regulatory subunit 10B, putative (RPT4)	4	3	2	4	0	0	0	3	2	0	0	0
PBANKA_140500		conserved Plasmodium protein, unknown function	25	34	25	10	5	6	15	14	16	0	0	0
PBANKA_140650		conserved Plasmodium protein, unknown function	8	10	9	0	0	0	0	0	3	0	0	0
PBANKA_140670		carbamoyl phosphate synthetase, putative	19	17	12	11	3	6	8	8	2	21	0	0
PBANKA_140700		conserved Plasmodium protein, unknown function	2	4	3	0	0	0	0	0	0	0	0	0
PBANKA_140760		60S ribosomal protein L24, putative	2	3	5	3	2	2	2	2	0	0	2	5
PBANKA_140960		meiosis-specific nuclear structural protein 1, putative	30	31	20	16	19	19	17	17	18	12	5	0
PBANKA_141000	RPT1	26S protease regulatory subunit 7, putative (RPT1)	6	5	6	1	0	0	0	1	3	9	0	0
PBANKA_141040		vacuolar ATP synthase subunit a, putative	22	22	23	2	2	0	2	2	0	12	0	0
PBANKA_141130	EIF4G	eukaryotic translation initation factor 4 gamma, putative (EIF4G)	9	13	8	1	3	0	0	3	2	10	0	0
PBANKA_141440		exportin-1, putative	6	5	7	0	0	4	0	0	0	0	0	0
PBANKA_141560	MCM4	DNA replication licensing factor MCM4, putative (MCM4)	34	37	19	9	26	23	18	7	24	24	12	0
PBANKA_141630	RPS19	40S ribosomal protein S19, putative (RPS19)	0	0	0	1	0	0	2	2	0	4	0	0
PBANKA_141690		chromosome segregation protein, putative	12	21	11	0	6	8	6	0	5	8	0	0
PBANKA_141730	SEC63	translocation protein SEC63, putative (SEC63)	7	6	10	2	0	0	0	4	2	0	0	0
PBANKA_141790		conserved Plasmodium protein, unknown function	28	22	18	0	6	6	8	0	5	8	3	0
PBANKA_141890	Rab11a	ras-related protein Rab-11A (Rab11a)	7	9	7	2	0	0	0	0	0	0	0	0
PBANKA_141910		dihydrolipoyllysine-residue succinyltransferase component of 2-oxoglutarate dehydrogenase complex, putative	0	0	0	1	0	0	0	1	0	10	0	0
PBANKA_142010		conserved Plasmodium protein, unknown function	4	4	5	0	0	0	0	0	0	0	0	0
PBANKA_142070		conserved Plasmodium protein, unknown function	4	7	3	0	3	4	3	0	3	4	0	0
PBANKA_142110		transcription elongation factor s-II, putative	1	6	2	0	0	0	0	0	0	0	0	0
PBANKA_142240		importin beta, putative	4	4	1	0	3	3	0	0	2	0	0	0
PBANKA_142330	ALBA1	DNA/RNA-binding protein Alba 1, putative (ALBA1)	12	17	12	5	5	5	6	6	6	0	8	10
PBANKA_142350		60S ribosomal protein L13-2, putative	0	0	0	1	3	0	3	5	2	0	2	0
PBANKA_142510	KARalpha	karyopherin alpha, putative (KARalpha)	2	5	5	3	6	8	4	2	4	0	2	0
PBANKA_142610		conserved protein, unknown function	4	4	1	0	0	0	0	0	0	0	0	0
PBANKA_142650	CUL1	cullin-1, putative (CUL1)	4	6	5	0	0	0	0	0	0	0	0	0
PBANKA_142690		RNA helicase, putative	25	29	21	17	13	10	9	0	4	0	0	2
PBANKA_142770	RUVB1	RuvB-like helicase 1, putative (RUVB1)	1	3	2	1	3	5	9	2	4	0	2	0
PBANKA_142830		conserved Plasmodium protein, unknown function	2	2	2	2	5	7	3	1	2	5	0	0
PBANKA_142870		eukaryotic translation initiation factor 3 subunit 10, putative	9	8	7	5	4	3	4	11	3	14	2	0
PBANKA_142940		dynein light chain 1, putative	0	0	1	2	4	2	2	2	3	5	0	0
PBANKA_143140		conserved Plasmodium protein, unknown function	0	2	1	0	4	5	3	0	3	3	0	0
PBANKA_143150		conserved Plasmodium protein, unknown function	5	6	4	0	0	0	0	2	0	4	0	0
PBANKA_143220	MDV1	male development gene 1 (MDV1)	0	0	0	0	0	0	0	0	0	7	0	0
PBANKA_143410		conserved Plasmodium protein, unknown function	0	0	0	2	2	4	0	1	2	15	0	0
PBANKA_143470		clathrin heavy chain, putative	11	12	6	15	4	4	5	0	2	0	0	4
PBANKA_143520		conserved Plasmodium protein, unknown function	0	1	0	2	0	0	0	4	0	0	0	0
PBANKA_143730	GRP94	endoplasmin, putative (GRP94)	1	2	1	4	5	4	5	3	8	0	0	0
PBANKA_143800	PKAr	CAMP-dependent protein kinase regulatory subunit, putative (PKAr)	3	3	4	0	0	0	0	0	0	0	0	0
PBANKA_143830		phospholipid-transporting ATPase, putative	5	3	4	0	0	0	0	0	0	0	0	0
PBANKA_143920	PABP	polyadenylate-binding protein, putative (PABP)	29	28	19	22	10	10	8	0	11	0	6	1
PBANKA_144220	SOC2	cyclin-related protein, putative	5	7	5	0	7	5	2	0	3	0	0	0
PBANKA_144300	NEK1	NIMA related kinase 1, putative (NEK1)	0	0	0	4	0	5	4	0	2	5	0	0
PBANKA_144410		t-complex protein 1 gamma subunit, putative	26	24	17	3	7	6	7	0	7	0	4	1
PBANKA_144490		vacuolar transporter chaperone, putative	2	4	1	2	0	0	0	1	0	0	0	0
PBANKA_144630	PRP2	pre-mRNA-splicing factor ATP-dependent RNA helicase PRP2, putative (PRP2)	0	2	1	0	0	0	0	0	0	0	15	0
PBANKA_144820		asparagine/aspartate rich protein, putative	9	18	10	0	0	2	0	0	0	0	0	0
PBANKA_144900		aspartyl protease, putative	1	1	0	4	3	3	4	3	4	5	0	0
PBANKA_145030		ATP synthase subunit beta, mitochondrial, putative	0	0	0	0	0	0	0	0	0	10	0	0
PBANKA_145040		conserved Plasmodium protein, unknown function	0	1	0	0	4	4	2	0	0	3	0	0
PBANKA_145070		clustered-asparagine-rich protein, putative	7	8	7	2	0	2	2	2	0	0	0	0
PBANKA_145160	UBA2	SUMO-activating enzyme subunit 2, putative (UBA2)	2	5	3	0	0	0	0	0	0	3	0	0
PBANKA_145260		calcyclin binding protein, putative	3	5	1	2	2	0	0	2	2	0	0	0
PBANKA_145330		acyl-CoA synthetase, putative	3	2	2	0	0	0	0	0	0	4	0	0
PBANKA_145460		conserved Plasmodium protein, unknown function	8	6	2	0	4	4	0	0	3	3	0	0
PBANKA_145510		replication factor C subunit 4, putative	13	9	6	2	7	5	5	5	4	9	4	0
PBANKA_145620	rabGDI	rab specific GDP dissociation inhibitor, putative (rabGDI)	4	3	2	1	0	0	0	4	2	0	0	0
PBANKA_145780	ARFGAP	ADP-ribosylation factor GTPase-activating protein, putative (ARFGAP)	8	12	12	0	0	0	0	0	0	8	0	0
PBANKA_145830		kinesin-13, putative	20	25	15	4	8	10	10	5	8	0	2	0
PBANKA_145880		kinesin, putative	36	32	30	8	9	8	9	7	14	15	0	0
PBANKA_145930		actin I	20	20	20	7	8	6	10	10	7	0	8	2
PBANKA_146040	FKBP35	FK506-binding protein (FKBP)-type peptidyl-prolyl isomerase, putative (FKBP35)	4	6	5	0	0	2	2	0	0	0	0	0
PBANKA_146180	RPT6	26S protease regulatory subunit 8, putative (RPT6)	3	4	0	1	0	0	0	2	0	0	0	0
PBANKA_146300	G377	osmiophilic body protein (G377)	0	0	0	7	5	5	5	6	6	0	0	0
			4108	5042	3616	1407	1605	1673	1672	1424	1581	2367	923	200
