# Supplementary material for: Multiple short windows of calcium-dependent protein kinase 4 activity coordinate distinct cell cycle events during Plasmodium gametogenesis
Source: eLife. 2017 May 8;6:e26524. doi: 10.7554/eLife.26524 (PMC5457135; doi:10.7554/eLife.26524)
Supplement: Supplementary file 2. — DOI: http://dx.doi.org/10.7554/eLife.26524.015 [file elife-26524-supp2.xlsx]

## Sheet: Table S2
Protein Group Accessions	Name	Protein description	Proteome Discoverer								MaxQuant							Differentially phosphorylated in CDPK4-KO	Peptides recovered from CDPK4 co-immunoprecipitation
			Modifications	Sequence	Posterior error probability	XCorr CDPK4S147G	IonScore CDPK4S147G	XCorr CDPK4S147M	IonScore CDPK4S147M	# Missed Cleavages	Localization probability	Score diff S147G	Posterior error probability	Amino acid	Phospho (STY) Probabilities	Intensity CDPK4S147G	Intensity CDPK4S147M
PBANKA_072020	SOC1	conserved Plasmodium protein, unknown function	S5(Phospho)	FKSESSVFELSK	0.006927	4.13488				1	0.815048	6.62287	0.00542897	S	FKS(0.003)ES(0.815)S(0.177)VFELS(0.005)K	89239	0	Yes	15
PBANKA_144220	SOC2	conserved Plasmodium protein, unknown function									0.752878	4.86199	1.26897e-06	S	AYDQS(0.001)IGS(0.246)S(0.753)LK	75832	0	Yes	27
PBANKA_130450	SOC3	conserved Plasmodium protein, unknown function	S15(Phospho)	VNDAQDLENTIKFESK	0.001499	4.31296	17.8			1	1	41.1777	0.00150963	S	VNDAQDLENT(1)IKFES(1)K	185310	0		22
PBANKA_111530	GAP40	glideosome-associated protein 40, putative (GAP40)	S3(Phospho); S4(Phospho)	KYSSKQEVIDSQA	0.001026	5.79419	38.29			2	0.995342	26.4692	0.0040419	S	KY(0.008)S(0.994)S(0.995)KQEVIDS(0.003)QA	356790	0
PBANKA_070640	SOC4	conserved Plasmodium protein, unknown function	NVSNVFEGENYNK	S3(Phospho)	0.03313	3.93474				0								Yes	23
PBANKA_070770	SOC6	conserved Plasmodium protein, unknown function	S3(Phospho)	IKSFFK	0.3584		35.07			1
PBANKA_061160	SOC7	ribonucleoside-diphosphate reductase, large subunit, putative	RLPSSSEGDQLK	S4(Phospho)	0.2849		47.67			1									129
PBANKA_031620	SOC11	Plasmodium exported protein, unknown function	T3(Phospho)	KFTKNSSGYDIQQIK	0.006025	4.25712	36.23			2
PBANKA_144330	SOC13	merozoite surface protein 9, putative	T4(Phospho)	IVNTNNFDGLSK	2.968e-05	4.23378				0
PBANKA_093970	SOC14	conserved Plasmodium protein, unknown function	S3(Phospho); N10(Deamidated)	IASSAATNTNGGLSSFGR	2.066e-05	4.2323				0
PBANKA_050530	SOC15	conserved Plasmodium protein, unknown function	T1(Phospho)	TESFSNIENIQIK	0.1899	4.16543	24.23			0
PBANKA_020270	SOC16	kinesin-8, putative	S3(Phospho)	YSSFESDVQASK	0.0005978	4.01195	44.79			0									87
PBANKA_136550	IBIS1	intra-erythrocytic P. berghei-induced structures protein 1 (IBIS1)	S3(Phospho)	ISSTLNPESTDR	0.1568	4.00639	54.96			0
PBANKA_070470	SOC5	conserved Plasmodium protein, unknown function									0.909659	10.0808	0.00733581	S	SNLPANY(0.001)FNAS(0.089)S(0.91)K	118710	0		68
PBANKA_135890	SOC8	dynactin subunit 2, putative									0.872033	8.39517	0.0119988	S	S(0.002)INS(0.872)T(0.126)NNIDNILK	83034	0
PBANKA_111520	SOC9	conserved Plasmodium protein, unknown function									0.992474	20.4343	5.87219e-06	S	TLY(0.036)S(0.804)RFS(0.168)S(0.992)K	1419300	0		66
PBANKA_122900	SOC10	Plasmodium exported protein, unknown function									0.754461	6.10742	2.48569e-19	T	Y(0.029)NS(0.185)RGT(0.754)S(0.029)NS(0.002)GSILNSMK	1348500	0		18
PBANKA_122530	SOC12	conserved Plasmodium protein, unknown function									0.968446	14.8225	0.00900467	T	NNVS(0.084)VS(0.947)T(0.968)KK	166600	0
PBANKA_081640	PFK9	6-phosphofructokinase, putative (PFK9)									0.996978	25.1832	1.13161e-56	S	LT(0.003)S(0.997)KNFLEEK	1787200	0		143
Proteins highlighted in bold were functionally characterised
