# Supplementary material for: Multiple short windows of calcium-dependent protein kinase 4 activity coordinate distinct cell cycle events during Plasmodium gametogenesis
Source: eLife. 2017 May 8;6:e26524. doi: 10.7554/eLife.26524 (PMC5457135; doi:10.7554/eLife.26524)
Supplement: Supplementary file 3. — DOI: http://dx.doi.org/10.7554/eLife.26524.016 [file elife-26524-supp3.xlsx]

## Sheet: Table S3
Annotated Sequence	Modifications	Modifications in Master Proteins	# Proteins	# PSMs	Master Protein Accessions	Protein description	Positions in Master Proteins	# Missed Cleavages	Theo. MH+ [Da]	PhosphoRS: Best Site Probabilities	Abundances (Scaled): F1: 126, Sample	Abundances (Scaled): F1: 127N, Sample	Abundances (Scaled): F1: 127C, Sample	Abundances (Scaled): F1: 128N, Sample	Abundances (Scaled): F1: 128C, Sample	Abundances (Scaled): F1: 129N, Sample	Abundances (Scaled): F1: 130N, Sample	Abundances (Scaled): F1: 131, Sample	Abundances (Normalized): F1: 126, WT 0 sec 1	Abundances (Normalized): F1: 127N, WT 18 sec 1	Abundances (Normalized): F1: 127C, WT 0 sec 2	Abundances (Normalized): F1: 128N, WT 18 sec 2	Abundances (Normalized): F1: 128C, C4 0 sec 1	Abundances (Normalized): F1: 129N, C4 18 sec 1	Abundances (Normalized): F1: 130N, C4 0 sec 2	Abundances (Normalized): F1: 131, C4 18 sec 2	Abundance: F1: 126, Sample	Abundance: F1: 127N, Sample	Abundance: F1: 127C, Sample	Abundance: F1: 128N, Sample	Abundance: F1: 128C, Sample	Abundance: F1: 129N, Sample	Abundance: F1: 130N, Sample	Abundance: F1: 131, Sample	Abundances Count: F1: 126, Sample	Abundances Count: F1: 127N, Sample	Abundances Count: F1: 127C, Sample	Abundances Count: F1: 128N, Sample	Abundances Count: F1: 128C, Sample	Abundances Count: F1: 129N, Sample	Abundances Count: F1: 130N, Sample	Abundances Count: F1: 131, Sample	XCorr Sequest HT	Confidence Sequest HT	DeltaM [ppm] Sequest HT	Percolator q-Value Sequest HT	Percolator PEP Sequest HT	Ions Score Mascot	DeltaM [ppm] Mascot
[K].SSDFGNQQK.[Y]	2xTMT6plex [N-Term; K9]; 1xPhospho [S1(100)]	PBANKA_130200 1xPhospho [S1019(93.9)]	1	3	PBANKA_130200	conserved Plasmodium protein, unknown function	PBANKA_130200 [1019-1027]	0	1548.75	S1(Phospho): 93.88	50.3	284.5	54	359.5	12.1	27.2	8.5	4	56.2	318.4	60.4	402.3	13.5	30.4	9.5	4.5	30.7	194.1	39.2	282.5	13.5	26.3	9.2	3.5	1	1	1	1	1	1	1	1	3.45667	High	0.345688	0.0006943	0.003947	26.9	0.345688
[K].INSQTYLNNIDK.[N]	2xTMT6plex [N-Term; K12]; 1xPhospho [S3(100)]	PBANKA_121320 1xPhospho [S191(100)]	1	2	PBANKA_121320	conserved Plasmodium protein, unknown function	PBANKA_121320 [189-200]	0	1961.01		102.3	264	75	316.2	10	18.2	14.3		21.4	55.3	15.7	66.2	2.1	3.8	3		11.7	33.7	10.2	46.5	2.1	3.3	2.9		1	1	1	1	1	1	1		3.02879	High	0.638655	0.0003692	0.001707	30.84	0.638655
[K].YGSLENAEK.[S]	2xTMT6plex [N-Term; K9]; 1xPhospho [S3(100)]	PBANKA_103900 1xPhospho [S312(100)]	1	3	PBANKA_103900	conserved Plasmodium protein, unknown function	PBANKA_103900 [310-318]	0	1548.77	S3(Phospho): 100	76.8	286.8	74.5	289.1	18.4	28.1	13.7	12.6	319.2	1192.5	309.7	1202.1	76.4	116.9	57	52.5	174.3	727	201.1	844.2	76.4	101.1	55.2	40.8	2	2	2	2	2	2	2	2	3.50822	High	1.29654	0.001035	0.008359	26.56	0.657314
[K].YNTNDVK.[N]	2xTMT6plex [N-Term; K7]; 1xPhospho [Y/T]	PBANKA_083250 1xPhospho [T562]	1	1	PBANKA_083250	conserved Plasmodium protein, unknown function	PBANKA_083250 [560-566]	0	1391.7		60.2	262.5	65.3	330.7	12.5	15.5	16.1	37.3	13.9	60.7	15.1	76.5	2.9	3.6	3.7	8.6	7.6	37	9.8	53.7	2.9	3.1	3.6	6.7	1	1	1	1	1	1	1	1	1.93105	Medium	0.322102	0.01388	0.1371	18.96	0.322102
[K].NPINQSK.[N]	2xTMT6plex [N-Term; K7]; 1xPhospho [S6(100)]	PBANKA_145830 1xPhospho [S566(100)]	1	2	PBANKA_145830	kinesin-13, putative	PBANKA_145830 [561-567]	0	1338.72	S6(Phospho): 100	79.3	266.9	76.3	286	22.9	34.1	19	15.7	249.8	840.9	240.3	901.2	72.1	107.3	59.9	49.3	136.4	512.6	156	632.9	72.1	92.8	58	38.3	2	2	2	2	2	2	2	2	3.17045	High	0.198629	0.005397	0.0476	17.85	-1.22477
[K].QSNLIDMTK.[Y]	2xTMT6plex [N-Term; K9]; 1xPhospho [S2(100)]; 1xOxidation [M7]	PBANKA_132920 1xPhospho [S4145(100)]	1	2	PBANKA_132920	dynein beta chain, putative	PBANKA_132920 [4144-4152]	0	1603.82		86.8	202	113	305.8	29.6	34.2	15.1	13.6	21.4	49.9	27.9	75.5	7.3	8.4	3.7	3.3	11.7	30.4	18.1	53	7.3	7.3	3.6	2.6	1	1	1	1	1	1	1	1	2.65499	High	0.382634	0.0006943	0.003423	32.58	0.382634
[R].ISSDSNVSDAK.[R]	2xTMT6plex [N-Term; K11]; 1xPhospho [S]		1	4	PBANKA_062130	conserved Plasmodium protein, unknown function	PBANKA_062130 [356-366]	0	1660.82		61.9	282.1	66.2	293.7	23	30.9	19.2	23	57.3	261.1	61.3	271.8	21.3	28.6	17.8	21.2	31.3	159.2	39.8	190.9	21.3	24.7	17.2	16.5	1	1	1	1	1	1	1	1	3.24625	High	-0.125501	0.0001929	0.0009418	34.96	-0.125501
[R].YSSFESDVQASK.[Q]	2xTMT6plex [N-Term; K12]; 1xDeamidated [Q9]; 1xPhospho [S/Y]		1	5	PBANKA_020270	kinesin-8, putative	PBANKA_020270 [37-48]	0	1886.88	S2(Phospho): 49.67; S3(Phospho): 49.67	122.9	275.3	97.1	231.2	21.9	19		32.6	17.9	40.2	14.2	33.7	3.2	2.8		4.8	9.8	24.5	9.2	23.7	3.2	2.4		3.7	1	1	1	1	1	1		1	2.48745	High	1.11541	0.001196	0.009354	25.79	1.11541
[K].SDTFIDHK.[Y]	2xTMT6plex [N-Term; K8]; 1xPhospho [S/T]	PBANKA_060120 1xPhospho [T5170(99.6)]	1	2	PBANKA_060120	dynein heavy chain, putative	PBANKA_060120 [5168-5175]	0	1500.75		103	225	123	242.7	26.1	25.3	29.7	25.3	46.2	100.9	55.1	108.8	11.7	11.3	13.3	11.3	25.2	61.5	35.8	76.4	11.7	9.8	12.9	8.8	1	1	1	1	1	1	1	1	2.66357	High	0.665445	0.00565	0.04943	29.36	0.665445
[K].LTSQSSISSYYNK.[N]	2xTMT6plex [N-Term; K13]; 2xPhospho [T/S/Y]	PBANKA_040560 2xPhospho [S290(83.8); S/T/Y]	1	3	PBANKA_040560	EB1 homolog, putative	PBANKA_040560 [288-300]	0	2095.98		68.3	311	47.6	259.3	34.1	36.9	15.4	27.4	6.4	29.2	4.5	24.3	3.2	3.5	1.4	2.6	3.5	17.8	2.9	17.1	3.2	3	1.4	2	1	1	1	1	1	1	1	1	1.95706	High	1.25071	0.004929	0.04141	10.87	1.25071
[K].YFSNNSTYK.[Y]	2xTMT6plex [N-Term; K9]; 1xPhospho [S3(100)]	PBANKA_020270 1xPhospho [S95(100)]	1	2	PBANKA_020270	kinesin-8, putative	PBANKA_020270 [93-101]	0	1661.8	S3(Phospho): 99.95	85.2	251.8	71.1	269.4	29.6	31.8	23.5	37.6	63.9	188.8	53.3	202.1	22.2	23.8	17.7	28.2	34.9	115.1	34.6	141.9	22.2	20.6	17.1	21.9	1	1	1	1	1	1	1	1	2.23919	High	2.7884	0.000861	0.00594	22.37	2.7884
[K].LVSNDNGNENDIDYK.[T]	2xTMT6plex [N-Term; K15]; 2xDeamidated [N6; N8]; 1xPhospho [S3(100)]	PBANKA_092580 1xPhospho [S248(100)]	1	2	PBANKA_092580	conserved Plasmodium protein, unknown function	PBANKA_092580 [246-260]	0	2250.02	S3(Phospho): 100	83	268.3	66.2	239.6	34.3	55.9	36.8	16	24.7	79.9	19.7	71.3	10.2	16.7	10.9	4.8	13.5	48.7	12.8	50.1	10.2	14.4	10.6	3.7	1	1	1	1	1	1	1	1	3.01031	High	5.39535	0.0001929	0.0009369	52.08	5.39535
[K].NNSYTQNAYK.[E]	2xTMT6plex [N-Term; K10]; 1xPhospho [S3(99.6)]	PBANKA_060200 1xPhospho [S60(99.6)]	1	4	PBANKA_060200	origin recognition complex subunit 1, putative (ORC1)	PBANKA_060200 [58-67]	0	1740.84		116.6	216.6	102.2	235.7	34.6	38.2	28.6	27.5	430.8	800.5	377.8	871	127.8	141.3	105.5	101.6	235.2	488	245.3	611.7	127.8	122.2	102.2	78.9	2	2	2	2	2	2	2	2	3.99007	High	2.18913	8.7e-05	0.0004661	32.75	2.18913
[K].YMHVQSK.[L]	2xTMT6plex [N-Term; K7]; 1xPhospho [Y/S]; 1xOxidation [M2]	PBANKA_080680 1xPhospho [S602]	1	1	PBANKA_080680	conserved Plasmodium protein, unknown function	PBANKA_080680 [597-603]	0	1446.72		94.4	245.1	77.6	263.5	26.6	31	18.6	43.1	39.7	103.2	32.7	110.9	11.2	13.1	7.8	18.2	21.7	62.9	21.2	77.9	11.2	11.3	7.6	14.1	1	1	1	1	1	1	1	1	2.03046	Medium	-0.362726	0.01267	0.1251	15.51	-0.362726
[K].NLLNQESNSYNINK.[N]	2xTMT6plex [N-Term; K14]; 1xDeamidated [N8]; 1xPhospho [S7(90.4)]	PBANKA_071970 1xPhospho [S388(90.4)]	1	3	PBANKA_071970	conserved Plasmodium protein, unknown function	PBANKA_071970 [382-395]	0	2190.08	S7(Phospho): 90.39	108.9	255	95.8	213.5	33.8	31.7	23.6	37.7	11.9	27.9	10.5	23.4	3.7	3.5	2.6	4.1	6.5	17	6.8	16.4	3.7	3	2.5	3.2	1	1	1	1	1	1	1	1	2.11556	High	9.69159	0.0003306	0.001485	41.2	9.69159
[R].AILSGEYK.[L]	2xTMT6plex [N-Term; K8]; 1xPhospho [S4(100)]	PBANKA_080770 1xPhospho [S1267(100)]	1	2	PBANKA_080770	kinesin-5, putative (EG5)	PBANKA_080770 [1264-1271]	0	1418.77		90.1	243.4	53.1	259.1	44.1	48.5	31.6	30.1	30	81.2	17.7	86.4	14.7	16.2	10.5	10	16.4	49.5	11.5	60.7	14.7	14	10.2	7.8	1	1	1	1	1	1	1	1	2.4096	High	-1.08572	0.001611	0.01275	24.77	-1.08572
[K].SNDNIVYK.[S]	2xTMT6plex [N-Term; K8]; 1xPhospho [S1(100)]	PBANKA_134320 1xPhospho [S1898(100)]	1	2	PBANKA_134320	conserved Plasmodium protein, unknown function	PBANKA_134320 [1898-1905]	0	1490.77		92.8	220.5	85.1	246.2	43.2	39.9	39.1	33.1	175.1	416.2	160.6	464.6	81.6	75.3	73.8	62.4	95.6	253.7	104.3	326.3	81.6	65.1	71.5	48.5	1	1	1	1	1	1	1	1	3.34289	High	-0.32952	0.0006213	0.002873	16.69	-0.32952
[K].SANLSGK.[Y]	2xTMT6plex [N-Term; K7]; 1xPhospho [S1(98.3)]	PBANKA_132220 1xPhospho [S255(100)]	1	1	PBANKA_132220	spindle assembly abnormal protein 4, putative (SAS4)	PBANKA_132220 [255-261]	0	1214.65		95	237.9	91.5	236.4	33.6	40.8	28.1	36.8	153.7	384.7	147.9	382.2	54.3	65.9	45.4	59.5	83.9	234.5	96	268.4	54.3	57	44	46.2	1	1	1	1	1	1	1	1	2.78295	High	1.57825	0.006525	0.05722	17.47	1.57825
[K].ERSKESHLEDR.[E]	2xTMT6plex [N-Term; K4]; 1xPhospho [S3]	PBANKA_130800 1xPhospho [S4350]	1	1	PBANKA_130800	conserved Plasmodium protein, unknown function	PBANKA_130800 [4348-4358]	2	1923.97		86.4	245.4	83.3	212.2	49.5	53.9	46.3	23	15	42.6	14.5	36.9	8.6	9.4	8.1	4	8.2	26	9.4	25.9	8.6	8.1	7.8	3.1	1	1	1	1	1	1	1	1						28.57	0.65487
[K].YNSNNNLSK.[S]	2xTMT6plex [N-Term; K9]; 1xPhospho [S3(100)]	PBANKA_050970 1xPhospho [S4517(100)]	1	6	PBANKA_050970	conserved Plasmodium protein, unknown function	PBANKA_050970 [4515-4523]	0	1591.79	S3(Phospho): 99.74	97.4	221.3	86.8	230.6	41.5	42.5	39.6	40.3	440.1	999.5	391.8	1041.6	187.6	191.8	178.9	181.8	240.3	609.3	254.4	731.5	187.6	165.9	173.3	141.2	4	4	4	4	4	4	4	4	3.31577	High	-1.02068	0.000822	0.005196	37.68	0.244666
[R].YVSNDYSK.[L]	2xTMT6plex [N-Term; K8]; 1xPhospho [S3(100)]	PBANKA_134320 1xPhospho [S2034(100)]	1	2	PBANKA_134320	conserved Plasmodium protein, unknown function	PBANKA_134320 [2032-2039]	0	1513.73	S3(Phospho): 99.96	78.4	242.4	60.9	249.8	37.8	53.6	39.5	37.6	55.3	171.1	43	176.3	26.7	37.8	27.9	26.5	30.2	104.3	27.9	123.8	26.7	32.7	27	20.6	1	1	1	1	1	1	1	1	2.76797	High	1.56248	0.002115	0.01591	16.65	1.56248
[K].AYDQSIGSSLK.[I]	2xTMT6plex [N-Term; K11]; 1xPhospho [S/Y]	PBANKA_144220 1xPhospho [S5064(89)]	1	6	PBANKA_144220	cyclin-related protein, putative	PBANKA_144220 [5057-5067]	0	1706.88		85.7	226.4	73.9	245.1	47.7	46	32.4	42.7	78.6	207.5	67.8	224.7	43.7	42.2	29.7	39.1	42.9	126.5	44	157.8	43.7	36.5	28.8	30.4	2	2	2	2	2	2	2	2	2.77178	High	-3.57816	0.0001278	0.0006262	43.35	-3.57816
[K].SGVNEIAMK.[S]	2xTMT6plex [N-Term; K9]; 1xOxidation [M8]; 1xPhospho [S1(100)]	PBANKA_040620 1xPhospho [S755(100)]	1	5	PBANKA_040620	conserved Plasmodium protein, unknown function	PBANKA_040620 [755-763]	0	1502.77	S1(Phospho): 100	92	210.8	97.4	229.4	46	54.8	41.2	28.3	130.2	298.4	137.9	324.6	65.1	77.6	58.3	40	71.1	181.9	89.5	228	65.1	67.1	56.5	31.1	3	3	3	3	3	3	3	3	2.96925	High	0.841444	0.0004851	0.002392	23.62	0.841444
[R].SNNYMDYEK.[M]	2xTMT6plex [N-Term; K9]; 1xOxidation [M5]; 1xPhospho [S1(99.6)]	PBANKA_093720.2 1xPhospho [S1155(100)]	2	2	PBANKA_093720	asparagine-rich antigen, putative	PBANKA_093720.2 [1155-1163]	0	1717.75	S1(Phospho): 100	99.7	196.6	85.1	232.2	54.2	48.7	51.1	32.4	36.4	71.8	31.1	84.9	19.8	17.8	18.7	11.8	19.9	43.8	20.2	59.6	19.8	15.4	18.1	9.2	1	1	1	1	1	1	1	1	2.77277	High	0.861428	0.0006943	0.003512	24.94	0.861428
[K].SESSVFELSK.[Y]					PBANKA_072020	conserved Plasmodium protein, unknown function	PBANKA_072020 [605-635]	0	4175.87	S3(Phospho): 98.08	38.1	81.6	62.8	123.6	125.1	115	113.2	140.6	9.3	20	15.4	30.3	30.7	28.2	27.8	34.5	5.1	12.2	10	21.3	30.7	24.4	26.9	26.8	2	3	3	3	3	3	3	3	2.26505	High	1.76433	0.0008514	0.005688	35	1.76433
[K].NTSNNYSGYEEK.[G]	2xTMT6plex [N-Term; K12]; 1xPhospho [S3(88.5)]		1	12	PBANKA_134170	conserved Plasmodium protein, unknown function	PBANKA_134170 [104-115]	0	1943.88	S3(Phospho): 88.66	87.3	224.6	80.9	229.9	42	44.9	43.7	46.8	185.5	477.5	171.9	488.7	89.2	95.4	92.8	99.5	101.3	291.1	111.6	343.2	89.2	82.5	89.9	77.3	4	4	4	4	4	4	4	4	3.08796	High	1.09647	0.0006896	0.003213	32.21	1.09647
[K].SGVEANPIVK.[N]	2xTMT6plex [N-Term; K10]; 1xPhospho [S1(100)]	PBANKA_091300 1xPhospho [S863(100)]	1	2	PBANKA_091300	conserved Plasmodium protein, unknown function	PBANKA_091300 [863-872]	0	1551.85	S1(Phospho): 100	98.9	185.2	105	235.1	43.6	47.7	40.2	44.4	51.1	95.6	54.2	121.5	22.5	24.6	20.8	22.9	27.9	58.3	35.2	85.3	22.5	21.3	20.1	17.8	1	1	1	1	1	1	1	1	2.88601	High	2.44043	0.0001929	0.0009603	18.86	2.44043
[K].SVQINGK.[N]	2xTMT6plex [N-Term; K7]; 2xDeamidated [Q3; N5]; 1xPhospho [S1(100)]	PBANKA_110420 1xPhospho [S17(100)]	1	1	PBANKA_110420	2-oxoisovalerate dehydrogenase subunit beta, mitochondrial, putative (BCKDHB)	PBANKA_110420 [17-23]	0	1285.68	S1(Phospho): 100	99.4	218.4	87.9	206.3	48.9	54.5	43.2	41.4	84.8	186.3	75	176	41.7	46.5	36.9	35.3	46.3	113.6	48.7	123.6	41.7	40.2	35.7	27.4	1	1	1	1	1	1	1	1	2.74394	High	0.160025	0.001584	0.01248	23.22	0.160025
[R].RASSYDKEEQK.[E]	3xTMT6plex [N-Term; K7; K11]; 1xPhospho [S3(99.5)]	PBANKA_040620 1xPhospho [S802(99.5)]	1	1	PBANKA_040620	conserved Plasmodium protein, unknown function	PBANKA_040620 [800-810]	2	2108.1	S3(Phospho): 99.49	91.9	172	89.6	243.2	52.2	66.8	51.6	32.8	50.6	94.6	49.3	133.8	28.7	36.8	28.4	18	27.6	57.7	32	94	28.7	31.8	27.5	14	1	1	1	1	1	1	1	1	2.64306	High	1.29923	0.006037	0.05438
[K].NLKSEEIDASVDTNNNR.[T]	2xTMT6plex [N-Term; K3]; 1xPhospho [S4(100)]	PBANKA_124420 1xPhospho [S1628(100)]	1	3	PBANKA_124420	conserved Plasmodium protein, unknown function	PBANKA_124420 [1625-1641]	1	2457.2	S4(Phospho): 100	77	221.3	65.8	221	50.8	55.1	55.8	53.2	76.6	220	65.5	219.7	50.5	54.8	55.5	52.9	41.8	134.1	42.5	154.3	50.5	47.4	53.7	41.1	2	2	2	2	2	2	2	2	2.59146	High	1.05237	0.0006213	0.002894	15.62	1.05237
[K].LVSNDNGNENDIDYK.[T]	2xTMT6plex [N-Term; K15]; 1xDeamidated [N]; 1xPhospho [S3(100)]	PBANKA_092580 1xPhospho [S248(100)]	1	6	PBANKA_092580	conserved Plasmodium protein, unknown function	PBANKA_092580 [246-260]	0	2249.04	S3(Phospho): 100	93.9	209	90	203.3	47.1	66.8	52.6	37.4	53.7	119.4	51.4	116.2	26.9	38.2	30	21.4	29.3	72.8	33.4	81.6	26.9	33	29.1	16.6	2	2	2	2	2	2	2	2	2.94372	High	4.83101	0.0004851	0.00217	45.01	-3.55474
[K].QNQLHSSNAK.[V]	2xTMT6plex [N-Term; K10]; 1xPhospho [S]	PBANKA_040620 1xPhospho [S327(98.8)]	1	2	PBANKA_040620	conserved Plasmodium protein, unknown function	PBANKA_040620 [321-330]	0	1664.85		89.6	195.4	96.8	223.2	45.8	51.2	42.1	56	23.1	50.4	25	57.5	11.8	13.2	10.8	14.4	12.6	30.7	16.2	40.4	11.8	11.4	10.5	11.2	1	1	1	1	1	1	1	1	2.51385	High	0.141165	0.0001929	0.001046	29.05	0.141165
[K].YNTSPGLLER.[S]	1xTMT6plex [N-Term]; 1xPhospho [T/S/Y]	PBANKA_010720 1xPhospho [T144(99.3)]	1	6	PBANKA_010720	conserved Plasmodium protein, unknown function	PBANKA_010720 [142-151]	0	1458.72	T3(Phospho): 99.91	81.4	216.3	77	214.2	52.8	56.4	46.8	55.2	229.1	608.9	216.7	603	148.5	158.8	131.7	155.3	125.1	371.2	140.7	423.5	148.5	137.3	127.5	120.6	4	4	4	4	4	4	4	4	3.81139	High	0.527855	5.957e-05	0.0003826	38.7	-0.0043835
[K].QNSLNGFTPK.[D]	2xTMT6plex [N-Term; K10]; 1xPhospho [S3(100)]; 1xDeamidated [N]	PBANKA_020270 1xPhospho [S601(100)]	1	9	PBANKA_020270	kinesin-8, putative	PBANKA_020270 [599-608]	0	1644.84		78.3	220.4	72.8	211.1	53.7	60.9	50.1	52.7	332.1	934.8	308.8	895.3	227.8	258.4	212.7	223.5	181.3	569.9	200.5	628.8	227.8	223.5	206	173.6	5	5	5	5	5	5	5	5	3.38949	High	-3.83978	0.0003692	0.001683	29.07	-3.83978
[R].LNSDPQLDK.[Q]	2xTMT6plex [N-Term; K9]; 1xPhospho [S3(100)]	PBANKA_050810 1xPhospho [S327(100)]	1	2	PBANKA_050810	chromodomain-helicase-DNA-binding protein 1, putative (CHD1)	PBANKA_050810 [325-333]	0	1567.81		91.3	198.2	87	208	51.1	60.1	54.4	50.1	52.4	113.7	49.9	119.3	29.3	34.5	31.2	28.7	28.6	69.3	32.4	83.8	29.3	29.8	30.2	22.3	1	1	1	1	1	1	1	1	2.86231	High	0.60376	0.001584	0.01241	25.09	0.60376
[R].NNSNLLVEGK.[E]	2xTMT6plex [N-Term; K10]; 1xPhospho [S3]	PBANKA_072010 1xPhospho [S2615(100)]	1	3	PBANKA_072010	conserved Plasmodium protein, unknown function	PBANKA_072010 [2613-2622]	0	1625.87		76.4	220.1	75.9	210.3	49.2	65	49.4	53.8	218.3	628.8	216.7	600.9	140.6	185.6	141.2	153.6	119.2	383.3	140.7	422	140.6	160.5	136.7	119.3	2	2	2	2	2	2	2	2	4.06993	High	-4.1171	0.0001742	0.0008644	31.76	-4.1171
[K].TQSFQNLDK.[E]	2xTMT6plex [N-Term; K9]; 1xPhospho [T/S]	PBANKA_030710 1xPhospho [S203(100)]	1	2	PBANKA_030710	conserved Plasmodium protein, unknown function	PBANKA_030710 [201-209]	0	1618.82	S3(Phospho): 99.97	97.5	168.4	99.9	233.4	47.9	54.5	40.5	57.9	96.2	166.2	98.6	230.2	47.3	53.8	40	57.2	52.5	101.3	64	161.7	47.3	46.5	38.7	44.4	1	1	1	1	1	1	1	1	2.88831	High	-1.54813	0.000577	0.002633	24.61	-1.54813
[K].SIYMHNNK.[T]	2xTMT6plex [N-Term; K8]; 1xOxidation [M4]; 1xPhospho [S1(100)]	PBANKA_101110 1xPhospho [S1179]	1	1	PBANKA_101110	conserved Plasmodium protein, unknown function	PBANKA_101110 [1179-1186]	0	1560.76	S1(Phospho): 99.97	81.9	186.7	93.3	217.6	64.6	64.4	40.7	50.8	20.1	45.9	22.9	53.5	15.9	15.8	10	12.5	11	28	14.9	37.6	15.9	13.7	9.7	9.7	1	1	1	1	1	1	1	1	1.915	Medium	-0.915858	0.01565	0.1557	20.06	-0.915858
[K].HIQDNDQNNSENNNK.[N]	2xTMT6plex [N-Term; K15]; 1xPhospho [S10(100)]	PBANKA_132140 1xPhospho [S684(100)]	1	2	PBANKA_132140	large ribosomal subunit nuclear export factor, putative (UIS20)	PBANKA_132140 [675-689]	0	2322.05		58.4	122.8	76.9	227	116.4	51.3	97.3	50	4.2	8.9	5.5	16.4	8.4	3.7	7	3.6	2.3	5.4	3.6	11.5	8.4	3.2	6.8	2.8	1	1	1	1	1	1	1	1	1.72222	High	2.06799	0.0001087	0.0005131	38.12	2.06799
[K].NNTGSGTLSNK.[N]	2xTMT6plex [N-Term; K11]; 1xPhospho [T/S]		1	8	PBANKA_144300	NIMA related kinase 1, putative (NEK1)	PBANKA_144300 [596-606]	0	1630.82	S5(Phospho): 98.79	81	207.1	80.6	206.1	54.6	60.7	51.2	58.6	184.6	471.9	183.8	469.7	124.4	138.4	116.6	133.5	100.8	287.7	119.3	329.9	124.4	119.7	112.9	103.7	4	4	4	4	4	4	4	4	3.43729	High	1.97792	0.0001742	0.0008811	46.62	1.97792
[K].NLLNQESNSYNINK.[N]	2xTMT6plex [N-Term; K14]; 1xPhospho [S7(99.9)]	PBANKA_071970 1xPhospho [S388(99.9)]	1	10	PBANKA_071970	conserved Plasmodium protein, unknown function	PBANKA_071970 [382-395]	0	2189.1	S7(Phospho): 99.87	96.1	186.5	88.2	201	59.1	59.5	50.4	59.2	58.1	112.7	53.3	121.5	35.7	36	30.5	35.8	31.7	68.7	34.6	85.3	35.7	31.1	29.5	27.8	3	3	3	3	3	3	3	3	3.5571	High	1.50211	0	3.048e-05	66.66	1.50211
[K].KSESFDNAR.[S]	2xTMT6plex [N-Term; K1]; 1xPhospho [S4(99.9)]	PBANKA_111850 1xPhospho [S1934(99.9)]	1	1	PBANKA_111850	conserved Plasmodium protein, unknown function	PBANKA_111850 [1931-1939]	1	1591.79	S4(Phospho): 99.86	98.7	192	82.9	198	54	64.7	49.9	59.9	106.8	207.7	89.6	214.2	58.4	70	54	64.8	58.3	126.6	58.2	150.4	58.4	60.5	52.3	50.3	1	1	1	1	1	1	1	1	2.04664	High	0.934854	0.005905	0.05332
[R].IESVYINDDSNDISR.[W]	1xTMT6plex [N-Term]; 1xPhospho [S3(100)]	PBANKA_143200 1xPhospho [S6(100)]	1	4	PBANKA_143200	signal recognition particle subunit SRP19, putative (SRP19)	PBANKA_143200 [4-18]	0	2048.94	S3(Phospho): 100	103.5	258.2	46.6	106.3	121.1	79.4	45.9	39	5.1	12.8	2.3	5.3	6	3.9	2.3	1.9	2.8	7.8	1.5	3.7	6	3.4	2.2	1.5	1	1	1	1	1	1	1	1	3.29527	High	0.815565	0	1.036e-05	52.62	0.815565
[K].LHSNYHSPFHK.[N]	2xTMT6plex [N-Term; K11]; 2xPhospho [S3(90.6); Y5(89.2)]	PBANKA_091110 2xPhospho [S272(90.6); S276(100)]	1	5	PBANKA_091110	conserved Plasmodium protein, unknown function	PBANKA_091110 [270-280]	0	1984.92		64.1	205.4	58.6	218.9	58.1	63.9	55.9	75	79.9	255.7	73	272.5	72.3	79.6	69.6	93.3	43.6	155.9	47.4	191.4	72.3	68.8	67.4	72.5	2	2	2	2	2	2	2	2	3.45003	High	0.60735	0.0004851	0.002253	15.83	0.60735
[K].NRSFYLISNENDNK.[Y]	2xTMT6plex [N-Term; K14]; 1xPhospho [S3(100)]	PBANKA_135210 1xPhospho [S29(100)]	1	3	PBANKA_135210	conserved Plasmodium protein, unknown function	PBANKA_135210 [27-40]	1	2252.11		62.3	213.8	81.3	183.3	62.9	61.7	64.1	70.8	22.9	78.6	29.9	67.4	23.1	22.7	23.5	26	12.5	47.9	19.4	47.3	23.1	19.6	22.8	20.2	1	1	1	1	1	1	1	1	2.72009	High	1.41755	0.001506	0.01167	31.31	1.41755
[K].NRSFYLISNENDNK.[Y]	2xTMT6plex [N-Term; K14]; 1xDeamidated [N9]; 1xPhospho [S3(99.8)]	PBANKA_135210 1xPhospho [S29(99.8)]	1	1	PBANKA_135210	conserved Plasmodium protein, unknown function	PBANKA_135210 [27-40]	1	2253.1	S3(Phospho): 99.83	81.5	208.5	92.5	176.4	53.4	61.5	57	69.2	28.2	72.2	32	61.1	18.5	21.3	19.7	23.9	15.4	44	20.8	42.9	18.5	18.4	19.1	18.6	1	1	1	1	1	1	1	1	2.818	High	9.29676	0.009701	0.08642	24.12	9.29676
[K].RDSNDSINK.[Y]	2xTMT6plex [N-Term; K9]; 1xPhospho [S3(99.9)]	PBANKA_121590 1xPhospho [S1047(99.9)]	1	2	PBANKA_121590	conserved Plasmodium protein, unknown function	PBANKA_121590 [1045-1053]	1	1586.79	S3(Phospho): 99.94	103.2	152.2	65.4	216.9	71.4	70.5	65.4	55.1	35.7	52.7	22.6	75	24.7	24.4	22.6	19.1	19.5	32.1	14.7	52.7	24.7	21.1	21.9	14.8	1	1	1	1	1	1	1	1	2.50689	High	0.92816	0.0004851	0.002281	11.28	0.92816
[K].HITHDEINNYNK.[I]	2xTMT6plex [N-Term; K12]; 1xPhospho [T3(100)]	PBANKA_082070 1xPhospho [T261(100)]	1	2	PBANKA_082070	TLD domain-containing protein	PBANKA_082070 [259-270]	0	2036		101.6	180.4	73.4	185.4	75	65.5	59.2	59.6	44.1	78.4	31.9	80.6	32.6	28.4	25.7	25.9	24.1	47.8	20.7	56.6	32.6	24.6	24.9	20.1	1	1	1	1	1	1	1	1	3.29365	High	1.14043	5.957e-05	0.0004214	23.19	1.14043
[K].NVSNVFEGENYNK.[N]	2xTMT6plex [N-Term; K13]; 1xPhospho [S3(100)]	PBANKA_070640 1xPhospho [S791(100)]	1	1	PBANKA_070640	conserved Plasmodium protein, unknown function	PBANKA_070640 [789-801]	0	2051.98	S3(Phospho): 100	77.3	170.9	78.5	199.4	71.7	68.4	71	62.8	35.2	77.8	35.7	90.7	32.6	31.1	32.3	28.6	19.2	47.4	23.2	63.7	32.6	26.9	31.3	22.2	1	1	1	1	1	1	1	1	2.68167	High	-2.99201	0.008876	0.07746	23.03	-4.88911
[R].DLLSSTSVNLNDSK.[K]	2xTMT6plex [N-Term; K14]; 2xPhospho [S4(77.7); S/T]	PBANKA_101170 2xPhospho [S277(78.1); S278(78.1)]	1	4	PBANKA_101170	conserved Plasmodium protein, unknown function	PBANKA_101170 [274-287]	0	2111.01	S4(Phospho): 78.09; S5(Phospho): 78.09	86.2	171.8	67.4	204.6	68.2	78.2	67.6	56	28.6	56.9	22.3	67.8	22.6	25.9	22.4	18.5	15.6	34.7	14.5	47.6	22.6	22.4	21.7	14.4	1	1	1	1	1	1	1	1	3.35016	High	0.468314	0.0001929	0.0009781	40.86	0.468314
[K].SLENYTNLENYK.[T]	2xTMT6plex [N-Term; K12]; 1xPhospho [S1(100)]; 1xDeamidated [N7]	PBANKA_122670 1xPhospho [S193]	1	1	PBANKA_122670	AAA family ATPase, putative	PBANKA_122670 [193-204]	0	2026.98		76.6	171.5	52.6	211.6	78.1	92.9	72.7	43.9	7	15.6	4.8	19.2	7.1	8.4	6.6	4	3.8	9.5	3.1	13.5	7.1	7.3	6.4	3.1	1	1	1	1	1	1	1	1	1.47866	Medium	8.78077	0.01343	0.133	22.65	8.78077
[K].AYNSIEQNMQYLNK.[H]	2xTMT6plex [N-Term; K14]; 1xOxidation [M9]; 1xPhospho [S4(98.4)]	PBANKA_071970 1xPhospho [S106(98.4)]	1	3	PBANKA_071970	conserved Plasmodium protein, unknown function	PBANKA_071970 [103-116]	0	2270.09	S4(Phospho): 98.45	102.4	189.2	74.8	176.3	63.3	73.2	57.4	63.4	29.1	53.8	21.3	50.1	18	20.8	16.3	18	15.9	32.8	13.8	35.2	18	18	15.8	14	1	1	1	1	1	1	1	1	2.45822	High	0.0863271	0.0007106	0.004186	20.8	0.0863271
[K].NNGDDNENDDDGDDDDEDENDEDDDDANGNK.[K]	2xTMT6plex [N-Term; K31]		1	4	PBANKA_102350	conserved Plasmodium protein, unknown function	PBANKA_102350 [94-124]	0	3887.42		53.7	109.6	102.9	204.8	123.4	97	86.6	21.9	7.9	16.1	15.1	30	18.1	14.2	12.7	3.2	4.3	9.8	9.8	21.1	18.1	12.3	12.3	2.5	2	2	2	2	2	2	2	1	2.90643	High	-1.06744	0	4.268e-05	38.79	0.647396
[K].NGEQIEQTNSFISMK.[E]	2xTMT6plex [N-Term; K15]; 1xPhospho [T/S]; 2xDeamidated [N1; N9]; 1xOxidation [M14]		1	3	PBANKA_091260	conserved Plasmodium protein, unknown function	PBANKA_091260 [1801-1815]	0	2282.07		39.5	216.7	119.7	158.6	84.6	74.9	34.8	71.2	4.6	25.1	13.9	18.4	9.8	8.7	4	8.2	2.5	15.3	9	12.9	9.8	7.5	3.9	6.4	1	1	1	1	1	1	1	1	2.08032	High	9.28612	0.0008711	0.006235	28.59	9.28612
[K].QKSNENIDEIEK.[E]	3xTMT6plex [N-Term; K2; K12]; 1xPhospho [S3(100)]	PBANKA_090550 1xPhospho [S496(100)]	1	2	PBANKA_090550	conserved Plasmodium protein, unknown function	PBANKA_090550 [494-505]	1	2214.16		82.1	151.2	80.8	194.1	75.2	71	77.8	67.8	69	127.1	67.9	163.2	63.2	59.7	65.4	57	37.7	77.5	44.1	114.6	63.2	51.6	63.3	44.3	1	1	1	1	1	1	1	1	3.29072	High	0.826953	0.0006943	0.003713	17.83	0.826953
[K].QNQLHSSNAK.[V]	2xTMT6plex [N-Term; K10]; 1xPhospho [S]; 1xDeamidated [N8]		1	2	PBANKA_040620	conserved Plasmodium protein, unknown function	PBANKA_040620 [321-330]	0	1665.84		88.6	202	64.6	165.4	66.7	79.6	63.3	69.9	16.5	37.6	12	30.8	12.4	14.8	11.8	13	9	22.9	7.8	21.6	12.4	12.8	11.4	10.1	1	1	1	1	1	1	1	1	2.23196	High	1.78552	0.0004851	0.00226	33.1	1.78552
[K].DNNLSDSVLSSYK.[L]	2xTMT6plex [N-Term; K13]; 2xPhospho [S5(99.8); S/Y]	PBANKA_135790 2xPhospho [S126; S131]	1	1	PBANKA_135790	conserved Plasmodium protein, unknown function	PBANKA_135790 [122-134]	0	2059.94		56.7	174.4	82.9	164.8	80.7	102.7	101.4	36.4	4.2	13	6.2	12.2	6	7.6	7.5	2.7	2.3	7.9	4	8.6	6	6.6	7.3	2.1	1	1	1	1	1	1	1	1	2.43886	Medium	-3.28621	0.01236	0.1218	32.53	-3.28621
[K].QNSTIITK.[T]	2xTMT6plex [N-Term; K8]; 1xPhospho [S3(99.7)]	PBANKA_092770 1xPhospho [S1181(99.7)]	1	2	PBANKA_092770	conserved Plasmodium protein, unknown function	PBANKA_092770 [1179-1186]	0	1442.8	S3(Phospho): 99.72	75.7	176.6	71.9	202.1	53.9	75.5	61.9	82.4	57.7	134.7	54.8	154.1	41.1	57.6	47.2	62.8	31.5	82.1	35.6	108.2	41.1	49.8	45.7	48.8	1	1	1	1	1	1	1	1	2.53498	High	-0.231334	0.001855	0.01465	27.02	-0.231334
[R].ELGNDDDDNNSVYNYLPQNNDIYK.[I]	2xTMT6plex [N-Term; K24]; 1xPhospho [S/Y]		1	4	PBANKA_122710	conserved Plasmodium protein, unknown function	PBANKA_122710 [153-176]	0	3370.52	S11(Phospho): 72.13	66.4	230.4	108.2	119.4	77	65.5	51.5	81.7	2.9	10.2	4.8	5.3	3.4	2.9	2.3	3.6	1.6	6.2	3.1	3.7	3.4	2.5	2.2	2.8	1	1	1	1	1	1	1	1	2.20621	High	-0.96056	0.0009189	0.006469	30.36	-0.96056
[K].HTNYEESDEYIDNNMLEFGK.[K]	2xTMT6plex [N-Term; K20]; 2xPhospho [T2(95.2)]; 1xDeamidated [N]; 1xOxidation [M15]	PBANKA_081980 2xPhospho [T942(95.2); S947(78.2)]	1	10	PBANKA_081980	gamma-glutamylcysteine synthetase (gammaGCS)	PBANKA_081980 [941-960]	0	3083.27		41.8	142.1	105.5	162.6	115.2	89.1	103.2	40.4	4.4	14.9	11.1	17.1	12.1	9.4	10.8	4.2	2.4	9.1	7.2	12	12.1	8.1	10.5	3.3	1	1	1	1	1	1	1	1	1.97537	High	7.8774	0.002899	0.02506	23.85	7.8774
[K].RNSNNINSEK.[E]	2xTMT6plex [N-Term; K10]; 1xPhospho [S3(99.9)]	PBANKA_041610 1xPhospho [S4941(100)]	1	1	PBANKA_041610	dynein heavy chain, putative	PBANKA_041610 [4939-4948]	1	1713.87	S3(Phospho): 100	51	139	65.3	203.4	112.6	100.8	81.2	46.8	4.2	11.5	5.4	16.8	9.3	8.3	6.7	3.9	2.3	7	3.5	11.8	9.3	7.2	6.5	3	1	1	1	1	1	1	1	1	1.4321	High	0.908427	0.00548	0.04825
[K].DNFNSDGTEANDGLINEDVFIENK.[N]	2xTMT6plex [N-Term; K24]; 1xPhospho [S/T]		1	3	PBANKA_124390	conserved Plasmodium protein, unknown function	PBANKA_124390 [378-401]	0	3208.47		42.7	167.4	105.9	150.1	114.3	110.3	77.9	31.4	3.8	15.1	9.5	13.5	10.3	9.9	7	2.8	2.1	9.2	6.2	9.5	10.3	8.6	6.8	2.2	1	1	1	1	1	1	1	1	2.71906	High	1.75541	5.957e-05	0.0003592	54.06	1.75541
[K].YTNSIEHQNMMNAHNEDLSTYQK.[N]	2xTMT6plex [N-Term; K23]; 1xDeamidated [Q/N]; 2xOxidation [M10; M11]; 1xPhospho [Y/T/S]		1	6	PBANKA_020270	kinesin-8, putative	PBANKA_020270 [102-124]	0	3339.47	Y1(Phospho): 73.64	74.5	168.4	77.5	198.3	52.9	71.1	65.1	92.3	14.7	33.1	15.2	39	10.4	14	12.8	18.2	8	20.2	9.9	27.4	10.4	12.1	12.4	14.1	1	1	1	1	1	1	1	1	2.70566	High	4.87601	0.001171	0.008801	20.15	4.87601
[R].KINSNNNVSENISEGNR.[L]	2xTMT6plex [N-Term; K1]; 1xPhospho [S]	PBANKA_090690 1xPhospho [S426(95.9)]	1	9	PBANKA_090690	conserved Plasmodium protein, unknown function	PBANKA_090690 [414-430]	1	2427.2		82.1	159.6	79.7	183.2	69.5	74.2	72.5	79.2	113	219.6	109.7	252.2	95.7	102.1	99.7	108.9	61.7	133.9	71.2	177.1	95.7	88.3	96.6	84.6	4	4	4	4	4	4	4	4	3.86706	High	0.130515	0	3.022e-05	52.49	2.07232
[K].EYSGVGLNNNEPASEK.[N]	2xTMT6plex [N-Term; K16]; 3xDeamidated [N8; N9; N10]		1	1	PBANKA_051270	conserved Plasmodium protein, unknown function	PBANKA_051270 [75-90]	0	2169.06		79.9	172.8	72.1	179.5	65.3	78.6	72.8	79	50.9	110.1	45.9	114.3	41.6	50.1	46.4	50.3	27.8	67.1	29.8	80.3	41.6	43.3	44.9	39.1	1	1	1	1	1	1	1	1	3.33413	High	-1.22644	0.009746	0.08796	17.29	-1.22644
[K].NSIIYNDDNIEVSEDK.[T]	2xTMT6plex [N-Term; K16]; 1xPhospho [S2(100)]	PBANKA_111980 1xPhospho [S80(100)]	1	2	PBANKA_111980	conserved Plasmodium protein, unknown function	PBANKA_111980 [79-94]	0	2406.15		28.4	135.2	103	218.1	79.5	111	76.1	48.7	2.9	13.9	10.6	22.5	8.2	11.4	7.8	5	1.6	8.5	6.9	15.8	8.2	9.9	7.6	3.9	1	1	1	1	1	1	1	1	2.50834	High	0.588897	0.0001278	0.0007905	40.88	0.588897
[K].QMEEENDNDAEEDK.[T]	2xTMT6plex [N-Term; K14]; 1xOxidation [M2]		1	2	PBANKA_041800	DEAD/DEAH box helicase, putative	PBANKA_041800 [1037-1050]	0	2169.95		105.9	164.8	44.5	141.1	99.1	103.4	102.3	39	7.7	12	3.2	10.3	7.2	7.5	7.4	2.8	4.2	7.3	2.1	7.2	7.2	6.5	7.2	2.2	1	1	1	1	1	1	1	1	1.67729	High	2.17887	0.0004442	0.001926	24.26	2.17887
[K].NNNNISHNSSDNNNSEK.[H]	2xTMT6plex [N-Term; K17]; 1xPhospho [S]		1	4	PBANKA_091410	conserved Plasmodium protein, unknown function	PBANKA_091410 [257-273]	0	2440.09	S9(Phospho): 46.18; S10(Phospho): 46.18	59.4	62.6	82.2	219.9	62.9	70.6	181.1	61.4	3.1	3.3	4.3	11.5	3.3	3.7	9.5	3.2	1.7	2	2.8	8.1	3.3	3.2	9.2	2.5	1	1	1	1	1	1	1	1	1.81062	High	1.36755	0.0004782	0.002073	24.73	1.36755
[K].NDDEHETSNNENDEK.[N]	2xTMT6plex [N-Term; K15]; 1xPhospho [T7(99.1)]	PBANKA_144820 1xPhospho [T2717(99.1)]	1	11	PBANKA_144820	asparagine/aspartate rich protein, putative	PBANKA_144820 [2711-2725]	0	2327.97	T7(Phospho): 99.12	36.6	96.1	89.6	203.1	117.7	107.7	111.2	38	8.1	21.2	19.7	44.7	25.9	23.7	24.5	8.4	4.4	12.9	12.8	31.4	25.9	20.5	23.7	6.5	2	3	3	3	3	3	3	2	3.03921	High	1.64495	0	5.463e-05	50.82	1.64495
[K].EEGTINNNNHNNK.[T]	2xTMT6plex [N-Term; K13]		1	4	PBANKA_091020	protein phosphatase 2C, putative	PBANKA_091020 [337-349]	0	1955.99		69.9	131.3	56.4	186.9	102	111.9	97.8	43.8	13.4	25.1	10.8	35.7	19.5	21.4	18.7	8.4	7.3	15.3	7	25.1	19.5	18.5	18.1	6.5	2	2	2	2	2	2	2	2	1.48826	High	0.107941	0.002742	0.02362	23.41	0.107941
[K].VQSNVNLNDDNNEK.[N]	2xTMT6plex [N-Term; K14]; 1xPhospho [S3(100)]	PBANKA_080680 1xPhospho [S577(100)]	1	2	PBANKA_080680	conserved Plasmodium protein, unknown function	PBANKA_080680 [575-588]	0	2141.03		76.4	170.7	85.2	159	64.8	85.9	75	82.9	37	82.7	41.3	77	31.4	41.6	36.3	40.2	20.2	50.4	26.8	54.1	31.4	36	35.2	31.2	1	1	1	1	1	1	1	1	4.58565	High	1.14474	0	3.508e-05	43.19	1.14474
[K].NGEQIEQTNSFISMK.[E]	2xTMT6plex [N-Term; K15]; 1xPhospho [T/S]; 1xDeamidated [Q/N]; 1xOxidation [M14]		1	6	PBANKA_091260	conserved Plasmodium protein, unknown function	PBANKA_091260 [1801-1815]	0	2281.08		55.8	221.5	40.6	154.8	58.5	110.5	71.4	86.9	6.8	26.9	4.9	18.8	7.1	13.4	8.7	10.6	3.7	16.4	3.2	13.2	7.1	11.6	8.4	8.2	1	1	1	1	1	1	1	1	1.74465	High	0.864801	0.0006213	0.002779	39.55	0.864801
[K].SKNENEDEEDVDEEEDEESGDDEYNNYSEK.[N]	3xTMT6plex [N-Term; K2; K30]; 2xPhospho [Y24(85.6); Y/S]	PBANKA_112350 2xPhospho [S874(100); Y897(85.6)]	1	1	PBANKA_112350	SNF2 helicase, putative (ISWI)	PBANKA_112350 [874-903]	1	4431.74		72.9	120.1	69.2	171.9	105.3	92.1	107.4	61.2	5.7	9.4	5.4	13.4	8.2	7.2	8.4	4.8	3.1	5.7	3.5	9.4	8.2	6.2	8.1	3.7	1	1	1	1	1	1	1	1	2.54683	High	-2.41038	0.006145	0.05503	24.56	-2.41038
[K].RNTETEEQIK.[T]	2xTMT6plex [N-Term; K10]; 1xPhospho [T3(99.7)]	PBANKA_082970 1xPhospho [T141(99.7)]	1	2	PBANKA_082970	guanylate kinase, putative (GK)	PBANKA_082970 [139-148]	1	1785.91	T3(Phospho): 99.7	74.1	167.3	77.1	162.9	61.8	94.4	80.3	82.1	23.3	52.5	24.2	51.1	19.4	29.6	25.2	25.8	12.7	32	15.7	35.9	19.4	25.6	24.4	20	1	1	1	1	1	1	1	1	1.73079	High	0.691498	0.006988	0.06047	17.16	0.691498
[K].MNSNAYEENDSFVGEHNNK.[N]	2xTMT6plex [N-Term; K19]; 2xPhospho [S3(100); Y/S]; 1xDeamidated [N]; 1xOxidation [M1]	PBANKA_060560 2xPhospho [S1878(100); S1886(99.5)]	1	3	PBANKA_060560	conserved Plasmodium protein, unknown function	PBANKA_060560 [1876-1894]	0	2834.14		103.9	158.8	58.3	177.5	59	95.9	61.5	85.2	18.7	28.5	10.5	31.9	10.6	17.2	11	15.3	10.2	17.4	6.8	22.4	10.6	14.9	10.7	11.9	1	1	1	1	1	1	1	1	3.58516	High	9.7982	0.0001278	0.0006805	35.21	9.7982
[R].YIITASDFEQGYR.[T]	1xTMT6plex [N-Term]; 1xPhospho [T/S/Y]	PBANKA_071560 1xPhospho [S373(90.6)]	1	5	PBANKA_071560	26S proteasome AAA-ATPase subunit RPT3, putative	PBANKA_071560 [368-380]	0	1871.88	S6(Phospho): 90.57	67.9	128.1	65.2	137.6	87.3	81.1	168.1	64.7	5.1	9.7	4.9	10.4	6.6	6.1	12.7	4.9	2.8	5.9	3.2	7.3	6.6	5.3	12.3	3.8	1	1	1	1	1	1	1	1	2.24629	High	-0.277303	5.957e-05	0.0002952	30.7	-0.277303
[K].DEVFDDQTSDYMSDEHEK.[I]	2xTMT6plex [N-Term; K18]; 1xOxidation [M12]; 2xPhospho [S13(90.4); T/S/Y]	PBANKA_090660 2xPhospho [S433(90.4); T/S/Y]	1	6	PBANKA_090660	coproporphyrinogen-III oxidase, putative (CPO)	PBANKA_090660 [421-438]	0	2824.1	T8(Phospho): 38.2; S9(Phospho): 38.2; Y11(Phospho): 33.2; S13(Phospho): 90.4	43.9	99	90.2	198.3	113.5	119	91.6	44.5	4.9	11.2	10.2	22.4	12.8	13.4	10.3	5	2.7	6.8	6.6	15.7	12.8	11.6	10	3.9	1	1	1	1	1	1	1	1	2.34952	High	1.10284	0.0001278	0.0006867	37.58	1.10284
[K].HQNSEEDDEYDDEDNNSTK.[D]	2xTMT6plex [N-Term; K19]; 1xDeamidated [N/Q]; 1xPhospho [S4(89.7)]	PBANKA_130700 1xPhospho [S162(89.7)]	1	6	PBANKA_130700	conserved Plasmodium protein, unknown function	PBANKA_130700 [159-177]	0	2823.12	S4(Phospho): 84.44	75	147.3	48.8	137.3	113.6	105.4	120	52.7	5.7	11.2	3.7	10.4	8.6	8	9.1	4	3.1	6.8	2.4	7.3	8.6	6.9	8.8	3.1	1	1	1	1	1	1	1	1	2.0853	High	8.71795	0.0006943	0.003506	31.84	-1.59469
[K].HSESSEVDDNNNNNHNGK.[D]	2xTMT6plex [N-Term; K18]; 3xDeamidated [N]		1	10	PBANKA_112010	conserved Plasmodium protein, unknown function	PBANKA_112010 [1011-1028]	0	2472.09		60.6	133.9	61.2	155.5	114.8	112.3	104.8	56.8	5.5	12.1	5.5	14.1	10.4	10.2	9.5	5.2	3	7.4	3.6	9.9	10.4	8.8	9.2	4	1	1	1	1	1	1	1	1	4.3339	High	1.70662	0	3.904e-07	55.32	1.70662
[K].NNSHDFHDNTK.[D]	2xTMT6plex [N-Term; K11]; 1xPhospho [S3(99.9)]	PBANKA_093550 1xPhospho [S2123(99.9)]	1	2	PBANKA_093550	conserved Plasmodium protein, unknown function	PBANKA_093550 [2121-2131]	0	1866.85		60.2	111.3	62.4	176.1	99.6	87.4	119.8	83.2	5.5	10.2	5.7	16.1	9.1	8	10.9	7.6	3	6.2	3.7	11.3	9.1	6.9	10.6	5.9	1	1	1	1	1	1	1	1	1.69125	High	-0.294642	0.001081	0.008558	15.37	-0.294642
[K].STSLLENEK.[I]	2xTMT6plex [N-Term; K9]; 1xPhospho [S1(100)]	PBANKA_083120 1xPhospho [S556(100)]	1	2	PBANKA_083120	diacylglycerol kinase, putative	PBANKA_083120 [556-564]	0	1558.81	S1(Phospho): 33.33; T2(Phospho): 33.33; S3(Phospho): 33.33	81.9	148.3	72.4	166.8	67	82.4	69.2	112	36.4	65.9	32.2	74.2	29.8	36.7	30.8	49.8	19.9	40.2	20.9	52.1	29.8	31.7	29.8	38.7	1	1	1	1	1	1	1	1	2.02352	High	-0.518143	0.006506	0.05708	14.58	0.58682
[K].DDNINEMGQNNNQIKDEEEEEDGVINLSENNK.[D]	3xTMT6plex [N-Term; K15; K32]; 1xOxidation [M7]		1	1	PBANKA_112350	SNF2 helicase, putative (ISWI)	PBANKA_112350 [1836-1867]	1	4394.08			108.8	34.1	191.4	151.4	127.9	123	63.5		6.4	2	11.2	8.9	7.5	7.2	3.7		3.9	1.3	7.9	8.9	6.5	7	2.9		1	1	1	1	1	1	1						36.71	-1.18073
[K].SSVVYSEIPHK.[K]	2xTMT6plex [N-Term; K11]; 1xPhospho [S/Y]		1	2	PBANKA_040110	serine/threonine protein kinase, putative (SRPK1)	PBANKA_040110 [1064-1074]	0	1783.94		87.5	79.5	42.1	203.2	97	79.8	110.7	100.2	12.8	11.6	6.2	29.8	14.2	11.7	16.2	14.7	7	7.1	4	20.9	14.2	10.1	15.7	11.4	1	1	1	1	1	1	1	1	2.41694	High	2.89428	0.003721	0.03023	12.32	2.89428
[K].QNLESNQSFQLK.[K]	2xTMT6plex [N-Term; K12]; 2xPhospho [S5(100); S8(100)]	PBANKA_140650 2xPhospho [S159(100); S162(100)]	1	2	PBANKA_140650	conserved Plasmodium protein, unknown function	PBANKA_140650 [155-166]	0	2053.98	S5(Phospho): 100; S8(Phospho): 100	50.8	128.1	82.8	156.7	101.6	92.3	98	89.8	6	15.3	9.9	18.7	12.1	11	11.7	10.7	3.3	9.3	6.4	13.1	12.1	9.5	11.3	8.3	1	1	1	1	1	1	1	1	2.00072	High	-2.61517	0.0007768	0.004413	18.46	-2.61517
[K].SFDTSEDFSNYNENNNFYNMHNDEYK.[T]	2xTMT6plex [N-Term; K26]; 1xPhospho [S1(94.8)]; 1xDeamidated [N]; 1xOxidation [M20]	PBANKA_090690 1xPhospho [S2257(94.8)]	1	9	PBANKA_090690	conserved Plasmodium protein, unknown function	PBANKA_090690 [2257-2282]	0	3793.53		52.2	163.1	38.5	154.4	91.1	87.6	97.6	115.5	7.5	23.5	5.5	22.2	13.1	12.6	14	16.6	4.1	14.3	3.6	15.6	13.1	10.9	13.6	12.9	1	1	1	1	1	1	1	1	2.6125	High	6.94427	0.0003171	0.001369	23.41	6.94427
[K].NENDDNHIKDNQSNEENNEGNISTSSNR.[D]	2xTMT6plex [N-Term; K9]; 2xDeamidated [N11; N14]; 1xPhospho [S/T]		1	1	PBANKA_070450	E3 ubiquitin-protein ligase, putative	PBANKA_070450 [6492-6519]	1	3728.59	S13(Phospho): 71.64	68.2		82	151.5	191.6	89.2	104.4	113.1	2.6		3.1	5.7	7.2	3.4	3.9	4.2	1.4		2	4	7.2	2.9	3.8	3.3	1		1	1	1	1	1	1	1.97878	High	5.77897	0.0009311	0.007333	13.4	5.77897
[K].ENEDNENDSDYDGEHTGSNK.[E]	2xTMT6plex [N-Term; K20]; 1xPhospho [S9(83.8)]; 1xDeamidated [N]	PBANKA_132020 1xPhospho [S1375(83.8)]	1	8	PBANKA_132020	conserved Plasmodium protein, unknown function	PBANKA_132020 [1367-1386]	0	2808.12		32.2	128.2	90.6	122.6	138.8	124.9	119.7	43	3.7	14.6	10.3	14	15.8	14.2	13.6	4.9	2	8.9	6.7	9.8	15.8	12.3	13.2	3.8	1	1	1	1	1	1	1	1	1.79833	High	7.21092	0.003676	0.02951	21.03	7.21092
[K].EDLDEIILNNENTDMNTANTNNNNNSDSNNNK.[I]	2xTMT6plex [N-Term; K32]; 1xOxidation [M15]		1	7	PBANKA_092990	heat shock protein 90, putative	PBANKA_092990 [597-628]	0	4082.85		44.5	135	60.2	176.7	51.3	149.7	118.4	64.3	3.3	10	4.5	13.1	3.8	11.1	8.8	4.8	1.8	6.1	2.9	9.2	3.8	9.6	8.5	3.7	1	1	1	1	1	1	1	1	3.50553	High	1.83096	0	2.462e-07	54.26	1.83096
[K].TSIYNDTDNAQLTDFYVTSASNTTFNK.[L]	2xTMT6plex [N-Term; K27]; 1xPhospho [T/Y/S]		1	9	PBANKA_070470	conserved Plasmodium protein, unknown function	PBANKA_070470 [278-304]	0	3569.67	S2(Phospho): 83.8	54.8	80.7	59.3	191.8	62	93.9	161.2	96.3	2.6	3.8	2.8	9	2.9	4.4	7.5	4.5	1.4	2.3	1.8	6.3	2.9	3.8	7.3	3.5	1	1	1	1	1	1	1	1	2.3842	High	-3.78011	0.0006554	0.00311	36.12	-3.78011
[K].EEAFNGDYDTDISGNIR.[R]	1xTMT6plex [N-Term]; 1xDeamidated [N]; 2xPhospho [T10(99.8); S13(100)]	PBANKA_103870 2xPhospho [T953(99.8); S956(100)]	1	3	PBANKA_103870	conserved Plasmodium protein, unknown function	PBANKA_103870 [944-960]	0	2305.91	T10(Phospho): 99.84; S13(Phospho): 100	42.9	158.6	70	131.4	89.4	137.2	104.4	66	2.9	10.8	4.8	9	6.1	9.4	7.1	4.5	1.6	6.6	3.1	6.3	6.1	8.1	6.9	3.5	1	1	1	1	1	1	1	1	2.76841	High	10.0397	0.0008111	0.0049	29.45	10.0397
[K].EDLDEIILNNENTDMNTANTNNNNNSDSNNNK.[I]	2xTMT6plex [N-Term; K32]; 2xDeamidated [N]; 1xOxidation [M15]		1	65	PBANKA_092990	heat shock protein 90, putative	PBANKA_092990 [597-628]	0	4084.82		90	172.8	41.7	127.2	96.3	134.6	61.1	76.2	9	17.2	4.2	12.7	9.6	13.4	6.1	7.6	4.9	10.5	2.7	8.9	9.6	11.6	5.9	5.9	2	2	2	2	2	2	2	2	2.35868	High	7.20565	3.638e-05	0.0001443	38.25	7.20565
[K].VWNDSEDDEYDDDSYDR.[K]	1xTMT6plex [N-Term]; 1xPhospho [S5(99.8)]	PBANKA_143930 1xPhospho [S145(99.8)]	1	4	PBANKA_143930	conserved Plasmodium protein, unknown function	PBANKA_143930 [141-157]	0	2446.9		71.5	147.8	46.3	126.9	89.1	99.6	120.9	98	7.1	14.8	4.6	12.7	8.9	9.9	12.1	9.8	3.9	9	3	8.9	8.9	8.6	11.7	7.6	1	1	1	1	1	1	1	1	3.43929	High	0.592418	0	8.13e-05	62.75	0.592418
[K].NEFSNSNNSSNSNNSNNNSNDDDINTLQQNVHLNR.[D]	1xTMT6plex [N-Term]		1	4	PBANKA_142620	CCR4-associated factor 1, putative (CAF1)	PBANKA_142620 [980-1014]	0	4163.84		55.6	152.8	51.6	126.7	100.5	79.9	104.9	128	5.3	14.6	4.9	12.1	9.6	7.6	10	12.2	2.9	8.9	3.2	8.5	9.6	6.6	9.7	9.5	1	1	1	1	1	1	1	1	4.41923	High	0.505567	0	7.8e-09	89.15	0.505567
[K].NDLPHDQNTNGNNNSNNNNNNAEK.[F]	2xTMT6plex [N-Term; K24]		1	3	PBANKA_090690	conserved Plasmodium protein, unknown function	PBANKA_090690 [245-268]	0	3124.44		78.7	70.5	42.8	176.3	117.5	131.5	129.1	53.7	6.2	5.6	3.4	14	9.3	10.4	10.2	4.2	3.4	3.4	2.2	9.8	9.3	9	9.9	3.3	1	1	1	1	1	1	1	1	2.56562	High	1.21592	8.7e-05	0.0004285	31.67	1.21592
[K].MGSEEMEEVQLNLSLNENNNK.[A]	2xTMT6plex [N-Term; K21]; 1xDeamidated [Q/N]; 2xOxidation [M1; M6]		1	9	PBANKA_131750	glucose-6-phosphate dehydrogenase-6-phosphogluconolactonase (G6PD-6PGL)	PBANKA_131750 [831-851]	0	2913.39		55.4	118	53	129.1	137.6	133.8	119.5	53.7	5.3	11.3	5.1	12.4	13.2	12.8	11.5	5.2	2.9	6.9	3.3	8.7	13.2	11.1	11.1	4	1	1	1	1	1	1	1	1	2.18318	High	1.127	0.0008711	0.006095	32.05	1.127
[K].NPELSGNSIMSDTNVSDNNNNGMIDEK.[K]	2xTMT6plex [N-Term; K27]; 2xPhospho [S/T]; 2xOxidation [M10; M23]	PBANKA_090960 2xPhospho [T/S]	1	3	PBANKA_090960	transcription factor with AP2 domain(s), putative (ApiAP2)	PBANKA_090960 [68-94]	0	3559.5		54.9	147.6	67.5	128.1	117.7	106.7	75	102.5	4.8	12.8	5.9	11.1	10.2	9.3	6.5	8.9	2.6	7.8	3.8	7.8	10.2	8	6.3	6.9	1	1	1	1	1	1	1	1						26.04	3.40315
[K].ENNEMSVKGNENDEGQGSADNNENDDK.[S]	3xTMT6plex [N-Term; K8; K27]; 2xPhospho [S6; S18]; 1xOxidation [M5]	PBANKA_121900 2xPhospho [S20(100); S32(100)]	1	1	PBANKA_121900	heat shock protein 90, putative	PBANKA_121900 [15-41]	1	3816.58		39.4	82.3	64	161.2	149	116	119.9	68.3	2.7	5.7	4.5	11.2	10.4	8.1	8.4	4.8	1.5	3.5	2.9	7.9	10.4	7	8.1	3.7	1	1	1	1	1	1	1	1	1.35681	High	-0.867841	0.005107	0.04351	24.47	-0.867841
[R].NNDFEEFENEEESEDEK.[I]	2xTMT6plex [N-Term; K17]; 1xDeamidated [N]; 1xPhospho [S13(100)]	PBANKA_110460 1xPhospho [S285(100)]	1	6	PBANKA_110460	conserved Plasmodium protein, unknown function	PBANKA_110460 [273-289]	0	2672.08	S13(Phospho): 100	44.6	100.6	82.3	155.6	120.3	125.4	101.4	69.8	5.7	12.8	10.5	19.8	15.3	16	12.9	8.9	3.1	7.8	6.8	13.9	15.3	13.8	12.5	6.9	1	1	1	1	1	1	1	1	3.29991	High	8.37863	8.7e-05	0.0004543	59.35	8.58421
[K].DDPTTNNTGGNK.[K]	2xTMT6plex [N-Term; K12]		1	2	PBANKA_100950	NAD(P)H-dependent glutamate synthase, putative	PBANKA_100950 [850-861]	0	1691.86		60.2	106.4	43.4	148.5	110.9	100	134.9	95.6	6.4	11.3	4.6	15.8	11.8	10.6	14.4	10.2	3.5	6.9	3	11.1	11.8	9.2	13.9	7.9	1	1	1	1	1	1	1	1	1.95763	High	0.335214	5.957e-05	0.0002742	38.2	0.335214
[K].GNDDYGIADNSEDAVDGMGADVEHVIDIVDSFQLTSTSLSK.[K]	2xTMT6plex [N-Term; K41]; 1xPhospho [T/S/Y]; 2xDeamidated [N10; Q/N]; 1xOxidation [M18]		1	3	PBANKA_111050	translationally-controlled tumor protein homolog, putative (TCTP)	PBANKA_111050 [44-84]	0	4856.19		66.7	70	59.9	187.7	89.1	97.3	125.8	103.5	5.3	5.6	4.8	15	7.1	7.7	10	8.2	2.9	3.4	3.1	10.5	7.1	6.7	9.7	6.4	1	1	1	1	1	1	1	1	2.99363	High	1.13573	0	1.564e-05	54.1	1.13573
[K].NDEHNENDTELSKDIDEFESDQDDDNK.[I]	3xTMT6plex [N-Term; K13; K27]; 2xPhospho [T/S]; 1xDeamidated [N/Q]	PBANKA_103640 2xPhospho [S539(86.5); S547(86.5)]	1	2	PBANKA_103640	BOP1-like protein, putative	PBANKA_103640 [528-554]	1	4058.68		63.2	162.2	48.3	84.9	130.2	156.1	116.7	38.4	4	10.3	3.1	5.4	8.3	9.9	7.4	2.4	2.2	6.3	2	3.8	8.3	8.6	7.2	1.9	1	1	1	1	1	1	1	1	2.5988	High	0.870846	0	8.912e-05	28.73	0.870846
[K].HQNSEEDDEYDDEDNNSTK.[D]	2xTMT6plex [N-Term; K19]; 2xPhospho [S4(100); S/T/Y]	PBANKA_130700 2xPhospho [S162(100); S/T/Y]	1	2	PBANKA_130700	conserved Plasmodium protein, unknown function	PBANKA_130700 [159-177]	0	2902.1	S4(Phospho): 100; S17(Phospho): 49.61; T18(Phospho): 49.61	45	103	42.1	156.8	114.7	111.5	134.4	92.6	4.9	11.3	4.6	17.2	12.6	12.3	14.8	10.2	2.7	6.9	3	12.1	12.6	10.6	14.3	7.9	1	1	1	1	1	1	1	1	3.64291	High	0.798992	3.638e-05	0.000156	47.05	0.798992
[R].NVASNEEEENSNAETIDNIYNVGR.[N]	1xTMT6plex [N-Term]; 1xPhospho [S11(89.3)]	PBANKA_101620 1xPhospho [S525(89.3)]	1	2	PBANKA_101620	protein kinase, putative	PBANKA_101620 [515-538]	0	2990.32	S11(Phospho): 89.32	48.8	187.5	73.3	70.5	156.2	55.1	59	149.6	2.6	9.8	3.9	3.7	8.2	2.9	3.1	7.9	1.4	6	2.5	2.6	8.2	2.5	3	6.1	1	1	1	1	1	1	1	1	4.10872	High	-1.59662	0	1.112e-08	86.85	-1.59662
[K].QNDNINNENNTCFNDK.[V]	2xTMT6plex [N-Term; K16]; 2xDeamidated [N]; 1xCarbamidomethyl [C12]; 1xPhospho [T11(100)]	PBANKA_081590 1xPhospho [T397(100)]	1	4	PBANKA_081590	BSD-domain protein, putative	PBANKA_081590 [387-402]	0	2494.06	T11(Phospho): 100	65.5	115.6	40.1	111.2	154	135.4	126.5	51.7	6	10.7	3.7	10.3	14.2	12.5	11.7	4.8	3.3	6.5	2.4	7.2	14.2	10.8	11.3	3.7	1	1	1	1	1	1	1	1	1.11524	High	0.779037	0.004701	0.03926
[K].NQVETSENNNDVENR.[I]	1xTMT6plex [N-Term]; 2xDeamidated [N9; N]; 1xPhospho [T/S]		1	10	PBANKA_072000	conserved Plasmodium protein, unknown function	PBANKA_072000 [274-288]	0	2072.86	T5(Phospho): 50; S6(Phospho): 50	59.3	128.9	47.4	109.6	110.2	98.3	143	103.3	7.3	15.9	5.9	13.5	13.6	12.1	17.7	12.7	4	9.7	3.8	9.5	13.6	10.5	17.1	9.9	1	1	1	1	1	1	1	1	2.41701	High	9.93926	0.0001278	0.0008016	33.72	9.93926
[K].INDSDNDEMFNHDPIAPEIYLVGK.[N]	2xTMT6plex [N-Term; K24]; 2xDeamidated [N]; 1xOxidation [M9]; 1xPhospho [S4(91.8)]	PBANKA_134850 1xPhospho [S165(91.8)]	1	4	PBANKA_134850	conserved Plasmodium protein, unknown function	PBANKA_134850 [162-185]	0	3302.52	S4(Phospho): 91.83	39.4	45.7	52.7	185.8	141.9	131.8	137.4	65.2	3.1	3.6	4.2	14.7	11.2	10.4	10.8	5.2	1.7	2.2	2.7	10.3	11.2	9	10.5	4	1	1	1	1	1	1	1	1	1.5531	High	7.00828	0.008024	0.06928	32.06	7.00828
[K].NNHNFDNNFHSRTQINERTK.[S]	2xTMT6plex [N-Term; K20]; 2xPhospho [S11; T19]; 3xDeamidated [N8; Q14; N16]	PBANKA_040210 2xPhospho [S1274; T1282]	1	1	PBANKA_040210	spindle pole body protein, putative	PBANKA_040210 [1264-1283]	2	3107.38		65.9	125.2	57.1	124.2	94.9	84.5	114.8	133.4	6	11.5	5.2	11.4	8.7	7.7	10.5	12.2	3.3	7	3.4	8	8.7	6.7	10.2	9.5	1	1	1	1	1	1	1	1						9.86	-3.70934
[K].ENELMSEELNNR.[I]	1xTMT6plex [N-Term]; 1xOxidation [M5]		1	1	PBANKA_140390	AAR2 protein, putative	PBANKA_140390 [64-75]	0	1722.82		61.5	108.5	50.2	150.8	97.7	114.2	103	114	6	10.7	4.9	14.8	9.6	11.2	10.1	11.2	3.3	6.5	3.2	10.4	9.6	9.7	9.8	8.7	1	1	1	1	1	1	1	1	1.32492	Medium	0.123283	0.01385	0.1366	18.58	0.123283
[R].DNVHNSYNNNNNQMDK.[S]	2xTMT6plex [N-Term; K16]; 1xDeamidated [Q/N]; 1xOxidation [M14]		1	11	PBANKA_100280	protein transport protein Sec24B, putative (SEC24B)	PBANKA_100280 [23-38]	0	2396.09			197.2	48.2	63.3	105.4	72.4	156.5	156.9		12	2.9	3.8	6.4	4.4	9.5	9.5		7.3	1.9	2.7	6.4	3.8	9.2	7.4		1	1	1	1	1	1	1	2.39804	High	1.47817	0.0001278	0.0006886	32.5	1.47817
[K].ENELNHGTSNSNNNNMENGGEK.[K]	2xTMT6plex [N-Term; K22]; 1xPhospho [S/T]; 3xDeamidated [N14; N15; N18]; 1xOxidation [M16]	PBANKA_143140 1xPhospho [T/S]	1	3	PBANKA_143140	conserved Plasmodium protein, unknown function	PBANKA_143140 [161-182]	0	2960.23		48.5	73.7	62.1	167.3	118.7	109.2	116.6	103.8	4.2	6.4	5.4	14.5	10.3	9.5	10.1	9	2.3	3.9	3.5	10.2	10.3	8.2	9.8	7	1	1	1	1	1	1	1	1						20.25	12.6513
[R].GLQEIEEMESLAKEDSEDANANR.[I]	2xTMT6plex [N-Term; K13]; 1xDeamidated [N/Q]; 1xOxidation [M8]; 1xPhospho [S10(99)]	PBANKA_061570 1xPhospho [S1891(99)]	1	7	PBANKA_061570	dynein heavy chain, putative	PBANKA_061570 [1882-1904]	1	3133.43	S10(Phospho): 99.01	58.7	149	78.2		134.9	112.7	111.7	154.8	4.4	11.2	5.9		10.1	8.4	8.4	11.6	2.4	6.8	3.8		10.1	7.3	8.1	9	1	1	1		1	1	1	1	2.39723	High	6.8278	0.000861	0.005698	24.83	6.8278
[K].TNNSNEQNDNANNEENK.[T]	2xTMT6plex [N-Term; K17]; 1xDeamidated [N3]		1	2	PBANKA_135370	nucleolar complex protein 2, putative	PBANKA_135370 [190-206]	0	2408.1		44.6	119.8	43.3	96	127.4	132.1	174.1	62.7	2.4	6.4	2.3	5.1	6.8	7.1	9.3	3.3	1.3	3.9	1.5	3.6	6.8	6.1	9	2.6	1	1	1	1	1	1	1	1	1.38677	High	-1.77324	0.0003692	0.001673	29.8	-1.77324
[K].TITLDVEPSDTIENVK.[A]	2xTMT6plex [N-Term; K16]; 1xDeamidated [N14]; 1xPhospho [S/T]		2	2	PBANKA_114170	ubiquitin-60S ribosomal protein L40, putative	PBANKA_114170 [12-27]	0	2313.19	S9(Phospho): 47.49; T11(Phospho): 47.49	79.7	135.6	42.5	136.3	111.7	120.8	46.4	127	5.5	9.4	2.9	9.4	7.7	8.3	3.2	8.8	3	5.7	1.9	6.6	7.7	7.2	3.1	6.8	1	1	1	1	1	1	1	1	2.18604	High	3.78997	0.004671	0.03867
[R].VIKDDNNENNNSINNSDTMSSGSYR.[D]	2xTMT6plex [N-Term; K3]; 2xPhospho [S/T/Y]; 1xOxidation [M19]		1	5	PBANKA_092540	dynein heavy chain, putative	PBANKA_092540 [1822-1846]	1	3422.46		55.1	134.9	50.4	79.3	118.5	119.6	162.5	79.7	6.2	15.3	5.7	9	13.4	13.5	18.4	9	3.4	9.3	3.7	6.3	13.4	11.7	17.8	7	1	1	1	1	1	1	1	1	2.03549	High	1.8197	0.0009311	0.007638	38.48	1.8197
[K].QNMQNITNGNDDIYHSIYDLENSNK.[N]	2xTMT6plex [N-Term; K25]; 2xDeamidated [N8; N10]; 1xOxidation [M3]; 1xPhospho [Y/S/T]		1	3	PBANKA_080180	conserved Plasmodium protein, unknown function	PBANKA_080180 [1905-1929]	0	3496.56	Y14(Phospho): 32.57; S16(Phospho): 32.57; Y18(Phospho): 32.57	35.8	70.5	78.2	183.6	149.8	135.5	44.4	102.3	2.7	5.4	6	14.1	11.5	10.4	3.4	7.9	1.5	3.3	3.9	9.9	11.5	9	3.3	6.1	1	1	1	1	1	1	1	1	1.79487	High	-2.63294	0.0009756	0.007943
[K].NNLSGDIHR.[N]	1xTMT6plex [N-Term]		1	2	PBANKA_080750	conserved Plasmodium protein, unknown function	PBANKA_080750 [711-719]	0	1254.68		56.4	78.9	56.3	169.8	73.1	73.4	131.1	161	2.9	4.1	2.9	8.8	3.8	3.8	6.8	8.4	1.6	2.5	1.9	6.2	3.8	3.3	6.6	6.5	1	1	1	1	1	1	1	1	1.3147	High	0.0417685	0.001506	0.01146	14.39	0.0417685
[R].NVSMADINMDGIK.[Y]	2xTMT6plex [N-Term; K13]; 1xPhospho [S3(100)]; 2xOxidation [M4; M9]	PBANKA_145830 1xPhospho [S753(100)]	1	4	PBANKA_145830	kinesin-13, putative	PBANKA_145830 [751-763]	0	1977.94		56.1	140.5	50.6	157.8	54.9	42.6	55.8	241.7	48.2	120.6	43.4	135.4	47.1	36.5	47.9	207.4	26.3	73.5	28.2	95.1	47.1	31.6	46.4	161.1	2	2	2	2	2	2	2	2	3.28318	High	1.43744	0.0004851	0.002351	28.44	1.43744
[R].TGMHNMYGNDEDYEINESNYR.[D]	1xTMT6plex [N-Term]; 1xPhospho [Y/T/S]; 2xOxidation [M3; M6]	PBANKA_144550 1xPhospho [S343(84.4)]	1	4	PBANKA_144550	conserved Plasmodium protein, unknown function	PBANKA_144550 [326-346]	0	2893.13		44.6	115.3	57.7	108.1	133.1	125.7	123.9	91.7	4.8	12.3	6.2	11.5	14.2	13.4	13.2	9.8	2.6	7.5	4	8.1	14.2	11.6	12.8	7.6	1	1	1	1	1	1	1	1	3.36517	High	-0.534432	0	7.744e-05	39.17	-0.534432
[K].LELNPEGNAENNQTNENQDTNNEESEIK.[Y]	2xTMT6plex [N-Term; K28]; 1xPhospho [T14(77.6)]; 3xDeamidated [N/Q]	PBANKA_111860 1xPhospho [T728(77.6)]	1	6	PBANKA_111860	cell division cycle protein 48 homologue, putative	PBANKA_111860 [715-742]	0	3728.63		26	112.6	76.9	129.2	97.5	144.9	122.4	90.5	4.6	19.8	13.6	22.8	17.2	25.6	21.6	16	2.5	12.1	8.8	16	17.2	22.1	20.9	12.4	1	2	2	2	2	2	2	2	2.38392	High	11.9969	0.001311	0.01009	14.5	11.9969
[K].THNEPQENDENNDNFQTNDMQSFNDNNNESSLEEK.[L]	2xTMT6plex [N-Term; K35]; 3xDeamidated [N/Q]; 1xOxidation [M20]		1	19	PBANKA_091460	RNA (uracil-5-)methyltransferase, putative	PBANKA_091460 [336-370]	0	4618.92		49.2	123.1	44.8	118	115.3	114	108.7	126.9	4.4	11	4	10.5	10.3	10.2	9.7	11.3	2.4	6.7	2.6	7.4	10.3	8.8	9.4	8.8	1	1	1	1	1	1	1	1	2.33926	High	5.95	0.0001087	0.0004824	33.46	5.95
[K].DKDTISIGSDNDMNEYSEAITTGNNLK.[R]	3xTMT6plex [N-Term; K2; K27]; 2xPhospho [T/Y/S]; 1xOxidation [M13]	PBANKA_146160 2xPhospho [S166(76.9); S169(89.4)]	1	2	PBANKA_146160	conserved Plasmodium protein, unknown function	PBANKA_146160 [161-187]	1	3808.75		65.3	123.5	36.6	114.2	124.8	113.4	92.1	130.1	6.6	12.5	3.7	11.5	12.6	11.4	9.3	13.1	3.6	7.6	2.4	8.1	12.6	9.9	9	10.2	1	1	1	1	1	1	1	1	3.6541	High	-2.52411	3.638e-05	0.0001257	33.3	-2.52411
[K].TEKGNEDENSEDELLYEQAEIDDNENNNDK.[H]	3xTMT6plex [N-Term; K3; K30]; 1xPhospho [T/Y/S]; 1xDeamidated [N/Q]	PBANKA_041170 1xPhospho [S251(100)]	1	4	PBANKA_041170	co-chaperone p23, putative	PBANKA_041170 [242-271]	1	4281.89		43.2	148	48.9	105.1	89.2	142.3	105.9	117.5	4.2	14.4	4.8	10.3	8.7	13.9	10.3	11.5	2.3	8.8	3.1	7.2	8.7	12	10	8.9	1	1	1	1	1	1	1	1	3.54827	High	4.314	0.0001087	0.0006007	51.11	4.314
[K].NHYNDSDNNTDANNYSSYNNDPLGDTK.[V]	2xTMT6plex [N-Term; K27]; 1xPhospho [Y/T/S]; 1xDeamidated [N]		1	29	PBANKA_130550	acid cluster protein 33 homologue, putative	PBANKA_130550 [328-354]	0	3601.5		40.3	74.6	54.2	123.3	176.1	135.8	125.8	69.9	2.7	5.1	3.7	8.4	12	9.3	8.6	4.8	1.5	3.1	2.4	5.9	12	8	8.3	3.7	1	1	1	1	1	1	1	1	2.57689	High	7.16754	0.0006943	0.003723	27.29	7.16754
[R].NTNTNNVDNVDISNQDDDNDDNNNLISEK.[L]	2xTMT6plex [N-Term; K29]; 1xPhospho [S/T]	PBANKA_141570 1xPhospho [S1706(98.9)]	1	2	PBANKA_141570	transcription factor with AP2 domain(s), putative (ApiAP2)	PBANKA_141570 [1694-1722]	0	3801.67		36.3	114.5	41.6	116.4	140.5	129.4	109	112.4	4.6	14.4	5.2	14.7	17.7	16.3	13.7	14.2	2.5	8.8	3.4	10.3	17.7	14.1	13.3	11	1	1	1	1	1	1	1	1	3.11446	High	1.0351	0	4.272e-06	37.59	1.0351
[R].NSNHTSHEYADTSPSGK.[S]	2xTMT6plex [N-Term; K17]; 2xPhospho [S2(77.4); S/Y/T]		1	2	PBANKA_121260	male gamete fusion factor HAP2 (HAP2)	PBANKA_121260 [805-821]	0	2450.04	S2(Phospho): 43.96; T5(Phospho): 43.96; S13(Phospho): 70.99	39.8	133	53.3	105.6	103.8	110.9	112.3	141.3	4	13.5	5.4	10.7	10.5	11.2	11.4	14.3	2.2	8.2	3.5	7.5	10.5	9.7	11	11.1	1	1	1	1	1	1	1	1	2.1007	High	1.64957	0.008222	0.07182	33.73	1.64957
[K].DNDKNNNQIDGEQNGINEDEHDDDR.[K]	2xTMT6plex [N-Term; K4]; 2xDeamidated [Q8; Q13]		1	1	PBANKA_080410	conserved Plasmodium protein, unknown function	PBANKA_080410 [1390-1414]	1	3373.47		51.7	128	46	102.9	122.9	131.6	104.6	112.3	6.2	15.4	5.5	12.4	14.8	15.8	12.6	13.5	3.4	9.4	3.6	8.7	14.8	13.7	12.2	10.5	1	1	1	1	1	1	1	1	2.41524	Medium	7.09698	0.04411	0.4123	38.04	7.09698
[R].NNSNINEISIPNK.[R]	2xTMT6plex [N-Term; K13]; 1xPhospho [S3(99.2)]	PBANKA_132890 1xPhospho [S856(99.2)]	1	2	PBANKA_132890	potassium channel, putative	PBANKA_132890 [854-866]	0	1995.03	S3(Phospho): 99.16	51.6	123.1	56.2	108.4	88.6	108.5	128.1	135.6	4.9	11.8	5.4	10.4	8.5	10.4	12.3	13	2.7	7.2	3.5	7.3	8.5	9	11.9	10.1	1	1	1	1	1	1	1	1	1.42058	High	0.480298	0.005244	0.04434	14.79	0.480298
[K].HSESSEVDDNNNNNHNGK.[D]	2xTMT6plex [N-Term; K18]; 1xDeamidated [N]; 1xPhospho [S]	PBANKA_112010 1xPhospho [S1014(78.7)]	1	24	PBANKA_112010	conserved Plasmodium protein, unknown function	PBANKA_112010 [1011-1028]	0	2550.09	S5(Phospho): 69.95		74.8	41.3	164.2	130.1	119.4	137.1	133		5.6	3.1	12.2	9.7	8.9	10.2	9.9		3.4	2	8.6	9.7	7.7	9.9	7.7		1	1	1	1	1	1	1	3.08473	High	1.07686	0	3.364e-05	32.17	1.07686
[K].NKEDSTNDDNSNLNGNNSNVNNSVNNESNSENKR.[N]	3xTMT6plex [N-Term; K2; K33]; 5xDeamidated [N]		1	3	PBANKA_122840	mannose-6-phosphate isomerase, putative	PBANKA_122840 [148-181]	2	4444.01		56.3	128.6	60.4	116.1	93.2	144.5	86.4	114.6	5.3	12.1	5.7	11	8.8	13.6	8.2	10.8	2.9	7.4	3.7	7.7	8.8	11.8	7.9	8.4	1	1	1	1	1	1	1	1						30.37	12.2189
[R].RRPTYSPTAR.[K]	1xTMT6plex [N-Term]; 2xPhospho [T4(99.2); Y/T/S]	PBANKA_071660 2xPhospho [T101(99.2); Y/S/T]	1	2	PBANKA_071660	conserved Plasmodium protein, unknown function	PBANKA_071660 [98-107]	1	1593.75		49.8	136	51.6	142.8	76.1	159.6	39.6	144.3	48.2	131.6	49.9	138.1	73.6	154.4	38.3	139.6	26.3	80.2	32.4	97	73.6	133.5	37.1	108.4	2	2	2	2	2	2	2	2	2.52656	High	1.28451	0.009408	0.08241	17.79	1.28451
[K].NNTQENANENDETGSEDINNNGNSK.[H]	2xTMT6plex [N-Term; K25]; 2xPhospho [T/S]; 2xDeamidated [N/Q]	PBANKA_135690 2xPhospho [T379(98); S381(97.9)]	1	11	PBANKA_135690	U4/U6 small nuclear ribonucleoprotein PRP4, putative (PRPF4)	PBANKA_135690 [367-391]	0	3342.33			71.7	48.6	131.5	157.9	115.2	165.6	109.5		3	2	5.4	6.5	4.7	6.8	4.5		1.8	1.3	3.8	6.5	4.1	6.6	3.5		1	1	1	1	1	1	1	1.70259	High	4.73049	0.0006213	0.002772	40.31	6.15487
[K].LELNPEGNAENNQTNENQDTNNEESEIKYEITR.[H]	2xTMT6plex [N-Term; K28]; 1xPhospho [T/S/Y]		1	3	PBANKA_111860	cell division cycle protein 48 homologue, putative	PBANKA_111860 [715-747]	1	4388.02		65.3	152	39.5	60.9	129.7	105.5	114.8	132.2	4.6	10.7	2.8	4.3	9.1	7.4	8.1	9.3	2.5	6.5	1.8	3	9.1	6.4	7.8	7.2	1	1	1	1	1	1	1	1	2.29236	High	-6.94421	0.004545	0.03828	22.71	-6.94421
[R].NNYSSWTSGEVPNNGQYSEYR.[I]	1xTMT6plex [N-Term]; 1xDeamidated [N/Q]; 1xPhospho [T/S/Y]		1	8	PBANKA_140070	Plasmodium exported protein, unknown function	PBANKA_140070 [89-109]	0	2762.16	T7(Phospho): 49.45; S8(Phospho): 49.45	54.8	119.9	58	116.7	77.5	102.5	99.5	171.1	4.9	10.8	5.2	10.5	7	9.3	9	15.5	2.7	6.6	3.4	7.4	7	8	8.7	12	1	1	1	1	1	1	1	1	3.35874	High	0.882097	0	2.486e-05	40.27	0.882097
[R].NDNNIDSDDERDVTNSDEIGDITNSNIEEK.[Y]	2xTMT6plex [N-Term; K30]; 2xPhospho [S/T]; 2xDeamidated [N]		1	26	PBANKA_092540	dynein heavy chain, putative	PBANKA_092540 [4724-4753]	1	4000.67		43.7	109.6	56.2	91	123.9	133.6	139.8	102.3	12.1	30.3	15.6	25.2	34.3	37	38.7	28.3	6.6	18.5	10.1	17.7	34.3	32	37.5	22	3	4	4	4	4	4	4	4	3.07917	High	9.42732	5.957e-05	0.0002924	36.25	12.4294
[K].LGLSIDEDDNNDIELPPLEETIEGVDSK.[M]	2xTMT6plex [N-Term; K28]; 1xPhospho [T21(99.8)]	PBANKA_080570 1xPhospho [T708(99.8)]	1	4	PBANKA_080570	heat shock protein 90, putative (HSP90)	PBANKA_080570 [688-715]	0	3607.76	T21(Phospho): 99.79	71.9	122.4	24.2	138.4	167.8	157.8	117.6		7.3	12.5	2.5	14.1	17.1	16.1	12		4	7.6	1.6	9.9	17.1	13.9	11.6		2	2	1	2	2	2	2		2.95409	High	-5.58202	0	7.464e-05	38.33	-1.21724
[K].EVPNNEYSYK.[K]	2xTMT6plex [N-Term; K10]; 1xPhospho [Y7(99.5)]	PBANKA_020700 1xPhospho [Y422(99.5)]	1	6	PBANKA_020700	calcium-transporting ATPase, putative (SERCA)	PBANKA_020700 [416-425]	0	1780.86	Y7(Phospho): 99.52	62.6	123.2	49	122.8	59.7	164	72	146.8	101.7	200.1	79.6	199.5	97	266.4	117	238.6	55.5	122	51.7	140.1	97	230.4	113.3	185.3	2	2	2	2	2	2	2	2	3.08146	High	0.879613	0.0001278	0.0007809	33.52	0.323695
[R].SSPGNSLEIESYAK.[G]	2xTMT6plex [N-Term; K14]; 1xDeamidated [N5]; 1xPhospho [S/Y]		1	5	PBANKA_134340	conserved Plasmodium protein, unknown function	PBANKA_134340 [1179-1192]	0	2020.99	S1(Phospho): 49.92; S2(Phospho): 49.92	46.5	125	48.5	92.6	83.3	128.1	116.4	159.6	4.6	12.3	4.8	9.1	8.2	12.6	11.5	15.7	2.5	7.5	3.1	6.4	8.2	10.9	11.1	12.2	1	1	1	1	1	1	1	1	2.03972	High	3.30752	0.00134	0.01037	25.77	3.30752
[K].QNHDSDILSVTDTSNITNNNK.[N]	2xTMT6plex [N-Term; K21]; 1xDeamidated [N15]; 2xPhospho [S5(91.3); S/T]	PBANKA_091990 2xPhospho [S245(91.3); S/T]	1	1	PBANKA_091990	6-phosphofructokinase, putative	PBANKA_091990 [241-261]	0	2949.33	S5(Phospho): 91.28; S14(Phospho): 46.83	29.5	114	45.9	42.4	95.6	147.8	192.2	132.6	2.4	9.2	3.7	3.4	7.7	11.9	15.5	10.7	1.3	5.6	2.4	2.4	7.7	10.3	15	8.3	1	1	1	1	1	1	1	1	1.61008	High	3.56282	0.0008111	0.004952
[K].NVSSDSFDDLNTK.[I]	2xTMT6plex [N-Term; K13]; 1xPhospho [S3(92.8)]	PBANKA_135640 1xPhospho [S342(92.8)]	1	10	PBANKA_135640	DNA repair protein RAD5, putative (RAD5)	PBANKA_135640 [340-352]	0	1979.94		82.1	182.3	93.9	168.8	71	69.1	65.4	67.5	79.7	177	91.2	163.9	68.9	67.1	63.5	65.5	43.5	107.9	59.2	115.1	68.9	58	61.5	50.9	3	3	3	3	3	3	3	3	2.92421	High	-0.320668	0.0001278	0.0006695	44.39	-0.320668
[K].TQDEGNNEHYPMNQNEEK.[D]	2xTMT6plex [N-Term; K18]; 2xPhospho [T1; Y10]; 5xDeamidated [Q2; N6; N7; Q14; N15]	PBANKA_124550 2xPhospho [T2297; Y2306]	1	1	PBANKA_124550	conserved Plasmodium protein, unknown function	PBANKA_124550 [2297-2314]	0	2800.06		42.4	94.8	42.3	75.1	99.7	85.2	96.3	264.2	5.9	13.1	5.9	10.4	13.8	11.8	13.3	36.6	3.2	8	3.8	7.3	13.8	10.2	12.9	28.4	1	1	1	1	1	1	1	1						28.56	2.5316
[K].LGNNESDIDINEIDPEQEDSDDAHSNR.[G]	1xTMT6plex [N-Term]; 1xDeamidated [N/Q]; 1xPhospho [S20(100)]	PBANKA_071970 1xPhospho [S479(100)]	1	5	PBANKA_071970	conserved Plasmodium protein, unknown function	PBANKA_071970 [460-486]	0	3351.4	S20(Phospho): 99.95	58.2	168.7	62.9	71.1	151.2	120.6	134.3	33.1	3.8	11.2	4.2	4.7	10	8	8.9	2.2	2.1	6.8	2.7	3.3	10	6.9	8.6	1.7	1	1	1	1	1	1	1	1	3.18136	High	8.02758	0	1.193e-05	42.38	8.02758
[R].RHETGTSQYDDDNYK.[R]	2xTMT6plex [N-Term; K15]; 2xPhospho [Y9(76.7); T/S/Y]	PBANKA_142870 2xPhospho [Y981(76.7); T/S/Y]	1	3	PBANKA_142870	eukaryotic translation initiation factor 3 subunit 10, putative	PBANKA_142870 [973-987]	1	2447.03	T4(Phospho): 49.8; S7(Phospho): 43.39; Y9(Phospho): 76.66	93.8	134.6	79.6	209.2	67.6	71.8	67.4	75.9	20.7	29.7	17.6	46.1	14.9	15.8	14.9	16.7	11.3	18.1	11.4	32.4	14.9	13.7	14.4	13	1	1	1	1	1	1	1	1	2.54364	High	-0.479252	0.0003306	0.001594	28.97	-0.479252
[K].QVEEQDHNHMQEQDQNDNNEQNK.[C]	2xTMT6plex [N-Term; K23]; 1xOxidation [M10]		1	4	PBANKA_060660	conserved Plasmodium protein, unknown function	PBANKA_060660 [3659-3681]	0	3325.48		47.9	135.5	83.1	121.7	85.9	86.1	103.4	136.4	11.7	33.1	20.3	29.8	21	21	25.3	33.3	6.4	20.2	13.2	20.9	21	18.2	24.5	25.9	2	2	2	2	2	2	2	2	4.11002	High	0.976677	0	7.229e-06	38.09	0.976677
[K].NNDIDIQTNSLYSIK.[N]	2xTMT6plex [N-Term; K15]; 1xPhospho [S/Y/T]; 1xDeamidated [N/Q]	PBANKA_136160 1xPhospho [S1550(86.2)]	1	4	PBANKA_136160	E1-E2 ATPase, putative	PBANKA_136160 [1538-1552]	0	2277.14		71.8	120.9	62	142.2	69.5	135.4	72.3	125.9	13.7	23.1	11.9	27.2	13.3	25.9	13.8	24.1	7.5	14.1	7.7	19.1	13.3	22.4	13.4	18.7	1	1	1	1	1	1	1	1	2.24803	High	4.15217	0.000962	0.007658	28.97	4.15217
[K].YTNSIEHQNMMNAHNEDLSTYQK.[N]	2xTMT6plex [N-Term; K23]; 2xOxidation [M10; M11]; 1xPhospho [S/Y/T]		1	6	PBANKA_020270	kinesin-8, putative	PBANKA_020270 [102-124]	0	3338.49	S4(Phospho): 68.33	73.9	178.5	128.4	218.4	65.3	56.5	31.2	47.8	13.9	33.6	24.2	41.2	12.3	10.6	5.9	9	7.6	20.5	15.7	28.9	12.3	9.2	5.7	7	1	1	1	1	1	1	1	1	2.90472	High	1.99101	0.0003692	0.001672	29.9	1.99101
[K].ELDSLITNGSEIGNNSGR.[S]	1xTMT6plex [N-Term]; 1xPhospho [T/S]	PBANKA_121950 1xPhospho [S31(99.6)]	1	10	PBANKA_121950	chloroquine resistance transporter, putative (CRT)	PBANKA_121950 [22-39]	0	2185.03		75.7	131.5	52	117.7	92	73.2	90.6	167.3	9	15.6	6.2	14	10.9	8.7	10.7	19.8	4.9	9.5	4	9.8	10.9	7.5	10.4	15.4	2	2	2	2	2	2	2	2	3.70158	High	2.2094	0	1.463e-06	56.51	2.2094
[K].VSSNELIR.[T]	1xTMT6plex [N-Term]; 1xPhospho [S3(99.3)]	PBANKA_144160 1xPhospho [S55(99.3)]	1	1	PBANKA_144160	ataxin-3, putative (ATX3)	PBANKA_144160 [53-60]	0	1226.63	S3(Phospho): 99.3	109.9	207.1	101.3	203.9	43.3	39.2	47.3	48.1	44.1	83.2	40.7	81.9	17.4	15.7	19	19.3	24.1	50.7	26.4	57.5	17.4	13.6	18.4	15	1	1	1	1	1	1	1	1	2.57025	High	-0.00744925	0.003224	0.02688
[K].NEENQPSEESEQTENNDNEEKPDNSDK.[-]	3xTMT6plex [N-Term; K21; K27]; 2xDeamidated [Q5; N24]; 1xPhospho [S25(99)]	PBANKA_121930 1xPhospho [S834(99)]	1	1	PBANKA_121930	heat shock protein 110, putative (HSP110c)	PBANKA_121930 [810-836]	0	3918.68	S25(Phospho): 99.05	54.7	112	47.3	85.1	103.3	129.3	124.3	144	6.4	13.1	5.5	10	12.1	15.1	14.6	16.9	3.5	8	3.6	7	12.1	13.1	14.1	13.1	1	1	1	1	1	1	1	1	2.53635	High	5.9562	0.005381	0.04672
[K].KYQNDSQNSNEENK.[L]	1xPhospho [S9]; 2xTMT6plex [K1; K14]; 1xAcetyl [N-Term]; 4xDeamidated [Q3; N4; Q7; N13]	PBANKA_123850 1xPhospho [S213]; 1xAcetyl [N-Term]	1	1	PBANKA_123850	conserved Plasmodium protein, unknown function	PBANKA_123850 [205-218]	1	2281.97		69.7	59	58.6	190.4	156.3	115.3	103	47.7	6.8	5.7	5.7	18.5	15.2	11.2	10	4.6	3.7	3.5	3.7	13	15.2	9.7	9.7	3.6	1	1	1	1	1	1	1	1						26.5	0.391972
[K].NTSNNYSGYEEK.[G]	2xTMT6plex [N-Term; K12]; 1xDeamidated [N]; 1xPhospho [T/S/Y]		1	10	PBANKA_134170	conserved Plasmodium protein, unknown function	PBANKA_134170 [104-115]	0	1944.86	T2(Phospho): 49.98; S3(Phospho): 49.98	114.2	190.8	77.9	180.6	53.5	70.2	49.2	63.5	27.1	45.3	18.5	42.9	12.7	16.7	11.7	15.1	14.8	27.6	12	30.1	12.7	14.4	11.3	11.7	1	1	1	1	1	1	1	1	2.27803	High	1.37465	0.0006943	0.003988	29.61	1.37465
[K].YNSNNNLSK.[S]	2xTMT6plex [N-Term; K9]; 1xPhospho [Y/S]; 1xDeamidated [N]	PBANKA_050970 1xPhospho [S4517(93.5)]	1	9	PBANKA_050970	conserved Plasmodium protein, unknown function	PBANKA_050970 [4515-4523]	0	1592.77		92.6	184.6	91.8	171.8	61.1	70.3	67.7	60.1	230.8	460.1	228.9	428	152.2	175.1	168.6	149.9	126	280.5	148.6	300.6	152.2	151.4	163.3	116.4	3	3	3	3	3	3	3	3	2.67649	High	1.58963	0.004975	0.042	34.96	1.58963
[K].LVSNDNGNENDIDYK.[T]	2xTMT6plex [N-Term; K15]; 1xPhospho [S3(100)]	PBANKA_092580 1xPhospho [S248(100)]	1	2	PBANKA_092580	conserved Plasmodium protein, unknown function	PBANKA_092580 [246-260]	0	2248.05	S3(Phospho): 100	71.6	159.9	100.6	172.3	76.8	73.1	68.8	76.9	26.7	59.7	37.6	64.4	28.7	27.3	25.7	28.7	14.6	36.4	24.4	45.2	28.7	23.6	24.9	22.3	1	1	1	1	1	1	1	1	2.32183	High	-4.77485	0.003503	0.0282	37.06	-4.77485
[K].YNYSDDDISIK.[N]	2xTMT6plex [N-Term; K11]; 2xPhospho [S4(85.2); S9(100)]	PBANKA_135760 2xPhospho [S777(85.2); S782(100)]	1	2	PBANKA_135760	conserved Plasmodium protein, unknown function	PBANKA_135760 [774-784]	0	1950.85	S4(Phospho): 85.18; S9(Phospho): 100	35.2	43.1	107.4	231.6	127.3	87.6	131.4	36.4	3.5	4.3	10.6	22.9	12.6	8.7	13	3.6	1.9	2.6	6.9	16.1	12.6	7.5	12.6	2.8	1	1	1	1	1	1	1	1	2.49846	High	-2.97836	0.0051	0.04314	32.4	-2.97836
[K].QNDSDEEESEDEEESNSNNAGTNYK.[V]	2xTMT6plex [N-Term; K25]; 3xPhospho [S4(98); S/T/Y]	PBANKA_060530 3xPhospho [S434; S]	1	3	PBANKA_060530	eukaryotic translation initiation factor 5, putative	PBANKA_060530 [431-455]	0	3532.29		58.4	134.3	60.6	95.4	131.8	100.8	95.5	123.2	5.5	12.6	5.7	9	12.4	9.5	9	11.6	3	7.7	3.7	6.3	12.4	8.2	8.7	9	1	1	1	1	1	1	1	1	2.29254	Medium	-5.61459	0.01178	0.1141	21.29	-5.61459
[R].MDILSRGGTQEIEHR.[D]	1xTMT6plex [N-Term]; 2xPhospho [S5(100); T9]; 1xOxidation [M1]	PBANKA_030250 2xPhospho [S10(100); T14(100)]	1	6	PBANKA_030250	hexose transporter (HT)	PBANKA_030250 [6-20]	1	2146.96		71.3	140.6	66.4	124.7	67.2	135.4	68.9	125.4	94	185.2	87.5	164.2	88.5	178.3	90.8	165.2	51.3	112.9	56.8	115.3	88.5	154.2	87.9	128.3	5	5	5	5	5	5	5	5	3.11815	High	-1.15387	0.001453	0.01099	17.74	1.23414
[K].INDSEDEGDEDLENIMSTILK.[L]	2xTMT6plex [N-Term; K21]; 1xDeamidated [N14]; 1xOxidation [M16]; 1xPhospho [S4(100)]	PBANKA_143430 1xPhospho [S502(100)]	1	4	PBANKA_143430	conserved Plasmodium protein, unknown function	PBANKA_143430 [499-519]	0	2935.34	S4(Phospho): 100	64	59.6	60.3	179.1	104.8	150.3	144.3	37.8	4.6	4.3	4.3	12.8	7.5	10.8	10.3	2.7	2.5	2.6	2.8	9	7.5	9.3	10	2.1	1	1	1	1	1	1	1	1	2.67088	High	2.25289	0.0001929	0.001041	33.34	2.25289
[K].QNLESNQSFQLK.[K]	2xTMT6plex [N-Term; K12]; 2xPhospho [S5(100); S8]; 1xDeamidated [Q/N]	PBANKA_140650 2xPhospho [S159(100); S162(100)]	1	4	PBANKA_140650	conserved Plasmodium protein, unknown function	PBANKA_140650 [155-166]	0	2054.96		79.7	160.9	75	136.9	87.7	87.1	72.4	100.3	12.3	24.8	11.6	21.1	13.5	13.4	11.2	15.5	6.7	15.1	7.5	14.8	13.5	11.6	10.8	12	1	1	1	1	1	1	1	1	1.91658	High	6.29299	0.001573	0.01213	25.82	6.29299
[K].LENNESNDDNNNAQDGEE.[-]	1xTMT6plex [N-Term]; 1xPhospho [S6(100)]	PBANKA_121850 1xPhospho [S132(100)]	1	4	PBANKA_121850	protein phosphatase inhibitor 2, putative	PBANKA_121850 [127-144]	0	2329.89	S6(Phospho): 100	83.5	68.5	41	169.5	105.1	131.8	91.5	109.2	6.6	5.4	3.2	13.4	8.3	10.4	7.2	8.6	3.6	3.3	2.1	9.4	8.3	9	7	6.7	1	1	1	1	1	1	1	1	2.82995	High	2.653	0.000861	0.005781	54.64	-0.903966
[K].IKDDYNSNITSNNANISSR.[G]	2xTMT6plex [N-Term; K2]; 1xPhospho [S11(89.5)]		1	2	PBANKA_144600	conserved Plasmodium protein, unknown function	PBANKA_144600 [194-212]	1	2664.3	T10(Phospho): 30.47; S11(Phospho): 30.47; S17(Phospho): 30.47	87.6	165.6	98.1	190.5	67.7	65.6	63.2	61.6	21.6	40.8	24.2	47	16.7	16.2	15.6	15.2	11.8	24.9	15.7	33	16.7	14	15.1	11.8	1	1	1	1	1	1	1	1	2.10777	High	3.48767	0.000861	0.006003	19.66	1.28845
[R].MNYNNNDNHNNTK.[N]	2xTMT6plex [N-Term; K13]; 1xDeamidated [N10]; 1xOxidation [M1]		1	1	PBANKA_060560	conserved Plasmodium protein, unknown function	PBANKA_060560 [1734-1746]	0	2067.96		39	104.8	59.1	83.4	147	105.9	126.5	134.4	3.7	9.8	5.5	7.8	13.8	9.9	11.9	12.6	2	6	3.6	5.5	13.8	8.6	11.5	9.8	1	1	1	1	1	1	1	1						21.25	-0.806413
[K].HNNNYYEDNNTIDEYEEHR.[K]	1xTMT6plex [N-Term]; 1xPhospho [T11(82.2)]	PBANKA_142890 1xPhospho [T373(82.2)]	1	2	PBANKA_142890	bromodomain protein, putative	PBANKA_142890 [363-381]	0	2778.13	T11(Phospho): 82.21	58.4	120	75.7	136.2	102.9	102.1	99.8	105	11.2	23	14.5	26.1	19.7	19.5	19.1	20.1	6.1	14	9.4	18.3	19.7	16.9	18.5	15.6	1	1	1	1	1	1	1	1	1.70876	High	0.205156	0.001096	0.008587
[K].HSQSESIDK.[Y]	2xTMT6plex [N-Term; K9]; 1xPhospho [S4(98.4)]	PBANKA_111850 1xPhospho [S1851(98.4)]	1	2	PBANKA_111850	conserved Plasmodium protein, unknown function	PBANKA_111850 [1848-1856]	0	1568.77	S4(Phospho): 98.37	82.4	140	96.8	201.9	69.3	70	83.4	56.1	17.9	30.5	21.1	44	15.1	15.3	18.2	12.2	9.8	18.6	13.7	30.9	15.1	13.2	17.6	9.5	1	1	1	1	1	1	1	1	2.71412	High	0.59409	0.0004851	0.002234	18.92	0.59409
[K].MKSEDSTEEKSDEEEEDEEEEEEEEEDDDPEK.[L]	4xTMT6plex [N-Term; K2; K10; K32]; 1xOxidation [M1]; 2xPhospho [S/T]		1	9	PBANKA_124230	Hsc70-interacting protein,58 kDa phosphoprotein (HIP)	PBANKA_124230 [52-83]	2	4970	S3(Phospho): 50; S6(Phospho): 50; T7(Phospho): 50; S11(Phospho): 50	77.6	86.8	36.7	131.9	150.8	137.7	125.7	52.8	5.9	6.6	2.8	10	11.4	10.4	9.5	4	3.2	4	1.8	7	11.4	9	9.2	3.1	1	1	1	1	1	1	1	1	1.92591	High	1.62016	0.0007263	0.004211	42.63	1.62016
[K].ENSLHNESENK.[I]	2xTMT6plex [N-Term; K11]; 1xPhospho [S3(100)]	PBANKA_051010 1xPhospho [S103(100)]	1	4	PBANKA_051010	conserved Plasmodium protein, unknown function	PBANKA_051010 [101-111]	0	1838.87		94.8	175.4	94.5	185.4	61.7	70	57.1	61.2	81.3	150.4	81	159	52.9	60	48.9	52.5	44.4	91.7	52.6	111.7	52.9	51.9	47.4	40.8	2	2	2	2	2	2	2	2	3.1001	High	0.847516	0.0004607	0.002027	42.63	0.847516
[R].NSKDDDEIYNNLTESESMDNINLNK.[K]	3xTMT6plex [N-Term; K3; K25]; 2xDeamidated [N]; 1xOxidation [M18]; 1xPhospho [T/S/Y]		1	12	PBANKA_135630	conserved Plasmodium protein, unknown function	PBANKA_135630 [125-149]	1	3700.7	T13(Phospho): 30.2; S15(Phospho): 30.2; S17(Phospho): 30.2	46.6	112.9	58.1	85.9	150.9	146.1	92.5	106.9	4.9	12	6.2	9.1	16	15.5	9.8	11.3	2.7	7.3	4	6.4	16	13.4	9.5	8.8	1	1	1	1	1	1	1	1	2.608	High	6.99052	0.0001087	0.0004814	61.13	6.99052
[R].MDILSRGGTQEIEHR.[D]	1xTMT6plex [N-Term]; 1xDeamidated [Q10]; 1xOxidation [M1]; 2xPhospho [S5(100); T9(100)]	PBANKA_030250 2xPhospho [S10(100); T14(100)]	1	2	PBANKA_030250	hexose transporter (HT)	PBANKA_030250 [6-20]	1	2147.94	S5(Phospho): 100; T9(Phospho): 100	49	149.5	82.4	101.2	69.4	141.2	72.5	134.6	5.9	17.9	9.9	12.1	8.3	16.9	8.7	16.1	3.2	10.9	6.4	8.5	8.3	14.6	8.4	12.5	1	1	1	1	1	1	1	1	2.3998	High	-3.60045	0.0009311	0.007385	18.55	-3.60045
[R].SDDAYMGDEAFEK.[D]	2xTMT6plex [N-Term; K13]; 1xPhospho [Y/S]; 1xOxidation [M6]	PBANKA_123020 1xPhospho [S363(99.7)]	1	1	PBANKA_123020	cdc2-related protein kinase 5 (CRK5)	PBANKA_123020 [363-375]	0	2031.87		57.1	61.4	60.9	162.8	141.4	109.4	115.9	91	5.5	5.9	5.9	15.7	13.6	10.5	11.2	8.8	3	3.6	3.8	11	13.6	9.1	10.8	6.8	1	1	1	1	1	1	1	1	1.9071	High	-1.89083	0.000822	0.005346	14.53	-1.89083
[K].LGNNESDIDINEIDPEQEDSDDAHSNR.[G]	1xTMT6plex [N-Term]; 2xPhospho [S6(100); S20(99.2)]	PBANKA_071970 2xPhospho [S465(100); S479(99.6)]	1	11	PBANKA_071970	conserved Plasmodium protein, unknown function	PBANKA_071970 [460-486]	0	3430.38	S6(Phospho): 100; S20(Phospho): 99.97	72.9	124.5	54.3	115.7	116.9	135.2	110.2	70.3	17.8	30.3	13.2	28.2	28.5	33	26.8	17.1	9.7	18.5	8.6	19.8	28.5	28.5	26	13.3	4	4	3	4	4	4	4	4	4.95163	High	0.450493	0	2.225e-07	57.08	0.450493
[K].IDNENESQNDGSEYNENTDNDYK.[Q]	2xTMT6plex [N-Term; K23]; 2xPhospho [Y/T/S]; 1xDeamidated [N/Q]		1	22	PBANKA_114210	conserved Plasmodium protein, unknown function	PBANKA_114210 [1439-1461]	0	3326.29	S7(Phospho): 34.55; S12(Phospho): 34.55; Y14(Phospho): 34.55; T18(Phospho): 96.09	65.5	120.9	51.7	98.7	132.2	92.7	119.7	118.6	6	11.2	4.8	9.1	12.2	8.6	11	10.9	3.3	6.8	3.1	6.4	12.2	7.4	10.7	8.5	1	1	1	1	1	1	1	1	1.44744	High	-2.42189	0.002362	0.01833	20.94	-2.42189
[K].EKEKGEEQEQTENEQENDNNSVISTNK.[N]	4xTMT6plex [N-Term; K2; K4; K27]; 1xPhospho [S/T]		1	1	PBANKA_072190	60S ribosomal protein L7ae/L30e, putative	PBANKA_072190 [18-44]	2	4147.01		74.7	128.7	54.8	113.2	129.7	105.2	77.8	115.8	7.1	12.3	5.2	10.8	12.4	10.1	7.4	11.1	3.9	7.5	3.4	7.6	12.4	8.7	7.2	8.6	1	1	1	1	1	1	1	1	2.27242	High	-3.73175	0.0008711	0.006312	24	-3.73175
[K].NNDIDIQTNSLYSIK.[N]	2xTMT6plex [N-Term; K15]; 1xPhospho [Y/S/T]		1	2	PBANKA_136160	E1-E2 ATPase, putative	PBANKA_136160 [1538-1552]	0	2276.16	Y12(Phospho): 49.52; S13(Phospho): 49.52	73.4	115.5	72.9	159	76.5	127	82.1	93.8	12.1	19	12	26.2	12.6	20.9	13.5	15.5	6.6	11.6	7.8	18.4	12.6	18.1	13.1	12	1	1	1	1	1	1	1	1	2.29885	High	-2.84158	0.006483	0.05695	29.65	-2.84158
[K].NNNNSSYNNDDGQNNLR.[N]	1xTMT6plex [N-Term]; 2xDeamidated [N]		2	3	PBANKA_093720.2	asparagine-rich antigen, putative	PBANKA_093720.2 [680-696]	0	2183.94		58.2	96.5	53.2	111.7	123.3	109.1	130.2	117.8	6.2	10.3	5.7	12	13.2	11.7	13.9	12.6	3.4	6.3	3.7	8.4	13.2	10.1	13.5	9.8	1	1	1	1	1	1	1	1	2.90859	High	1.05393	0.0002581	0.001147	35.48	1.05393
[R].YNNTGSNNNISNNNSGVIANHEGSEIYSR.[V]	1xTMT6plex [N-Term]; 1xPhospho [Y/S/T]; 2xDeamidated [N]		1	5	PBANKA_121470	conserved Plasmodium protein, unknown function	PBANKA_121470 [508-536]	0	3450.5		57.8	151.1	42.6	35.6	90.8	100.4	103.2	218.5	4.4	11.5	3.2	2.7	6.9	7.6	7.8	16.6	2.4	7	2.1	1.9	6.9	6.6	7.6	12.9	1	1	1	1	1	1	1	1	2.74954	High	2.4873	0.0006213	0.002828	44.66	3.40712
[R].NNNVNNSNNHNIDNNAK.[T]	2xTMT6plex [N-Term; K17]		1	2	PBANKA_103980	conserved Plasmodium protein, unknown function	PBANKA_103980 [282-298]	0	2368.18		80.1	133.6	85.7	175.4	63.6	94.2	78	89.5	4	6.7	4.3	8.8	3.2	4.7	3.9	4.5	2.2	4.1	2.8	6.2	3.2	4.1	3.8	3.5	1	1	1	1	1	1	1	1	1.61352	High	-0.269792	0.0006943	0.003459	15.83	-0.269792
[M].GDEEVQALVIDNGSGNVK.[A]	1xPhospho [S14]; 1xTMT6plex [K18]; 1xAcetyl [N-Term]	PBANKA_145930 1xPhospho [S15]; 1xAcetyl [N-Term]	1	1	PBANKA_145930	actin I	PBANKA_145930 [2-19]	0	2195.04		72.1	164.4	63.4	86.7	68	68.3	203.3	73.7	4	9.2	3.5	4.8	3.8	3.8	11.4	4.1	2.2	5.6	2.3	3.4	3.8	3.3	11	3.2	1	1	1	1	1	1	1	1						39.1	1.5468
[K].TLGNNAYASNDLPTDTIIANR.[N]	1xTMT6plex [N-Term]; 1xDeamidated [N10]; 1xPhospho [T14(77.7)]	PBANKA_100340 1xPhospho [Y1029(84.6)]	1	4	PBANKA_100340	lysine decarboxylase, putative (UIS14)	PBANKA_100340 [1023-1043]	0	2544.22	Y7(Phospho): 84.56	83.5	127.6	76.4	169.9	36.2	49.6	127.4	129.5	6.2	9.5	5.7	12.7	2.7	3.7	9.5	9.7	3.4	5.8	3.7	8.9	2.7	3.2	9.2	7.5	1	1	1	1	1	1	1	1	3.65366	High	7.99194	0	5.733e-07	49.2	7.99194
[K].DIIHDPGR.[G]	1xTMT6plex [N-Term]		2	1	PBANKA_123170	60S ribosomal protein L2, putative (RPL2)	PBANKA_123170 [47-54]	0	1151.64		60.9	78.2	89	201.6	91	65.2	97	117.2	4.2	5.4	6.2	14	6.3	4.5	6.7	8.1	2.3	3.3	4	9.8	6.3	3.9	6.5	6.3	1	1	1	1	1	1	1	1	1.10508	Medium	0.733497	0.02584	0.2572	15.05	0.733497
[K].NDINNNGNENNNK.[M]	2xTMT6plex [N-Term; K13]		1	4	PBANKA_145480	RNA-binding protein, putative	PBANKA_145480 [993-1005]	0	1931.96		50.5	85.7	54.8	110.6	116.8	135.9	132.6	113.1	7	11.8	7.5	15.2	16.1	18.7	18.3	15.6	3.8	7.2	4.9	10.7	16.1	16.2	17.7	12.1	2	2	2	2	2	2	2	2	1.60012	High	0.0821255	0.0001087	0.0005326	33.21	0.0821255
[K].KEESEKAANENYNNNNTTSEENATTSETPAEK.[K]	4xTMT6plex [N-Term; K1; K6; K32]; 1xDeamidated [N]; 2xPhospho [S/Y/T]		1	14	PBANKA_143920	polyadenylate-binding protein, putative (PABP)	PBANKA_143920 [270-301]	2	4622.11	S4(Phospho): 31.06; Y12(Phospho): 31.06; T17(Phospho): 21.04; T18(Phospho): 21.04; S19(Phospho): 21.04; T24(Phospho): 21.04; T25(Phospho): 21.04; S26(Phospho): 21.04	63.2	107.2	53.1	111.1	147.9	107	107.7	102.8	7	11.8	5.9	12.2	16.3	11.8	11.9	11.3	3.8	7.2	3.8	8.6	16.3	10.2	11.5	8.8	1	1	1	1	1	1	1	1	1.97109	High	2.95795	0.003682	0.02962	32.31	2.97407
[K].LGNNESDIDINEIDPEQEDSDDAHSNR.[G]	1xTMT6plex [N-Term]; 1xDeamidated [N/Q]; 2xPhospho [S6(100); S20(100)]	PBANKA_071970 2xPhospho [S465(100); S479(99.9)]	1	15	PBANKA_071970	conserved Plasmodium protein, unknown function	PBANKA_071970 [460-486]	0	3431.36	S6(Phospho): 100; S20(Phospho): 99.88	18.1	59.8	69.5	102.1	117.4	168.7	163.4	101.1	2.9	9.7	11.2	16.5	19	27.3	26.4	16.4	1.6	5.9	7.3	11.6	19	23.6	25.6	12.7	1	2	3	3	3	3	3	3	4.74402	High	5.34373	0	5.493e-06	61.87	5.34373
[R].NYQSSTLQK.[L]	2xTMT6plex [N-Term; K9]; 1xPhospho [T/Y/S]	PBANKA_092580 1xPhospho [S357(99)]	1	1	PBANKA_092580	conserved Plasmodium protein, unknown function	PBANKA_092580 [354-362]	0	1606.82		80.9	138	73.4	148.3	84.9	110.7	78.1	85.7	41.9	71.5	38	76.9	44	57.4	40.5	44.4	22.9	43.6	24.7	54	44	49.6	39.2	34.5	1	1	1	1	1	1	1	1	2.36646	High	-1.33179	0.0009266	0.006773	10.81	-1.33179
[R].SDIGNAK.[R]	2xTMT6plex [N-Term; K7]; 1xPhospho [S1(100)]	PBANKA_093900 1xPhospho [S940(100)]	1	1	PBANKA_093900	ion channel protein, putative	PBANKA_093900 [940-946]	0	1242.65	S1(Phospho): 100	78.6	114.2	86.2	191.7	84.4	108.9	73.2	62.8	62.6	91	68.7	152.8	67.3	86.8	58.3	50.1	34.2	55.5	44.6	107.3	67.3	75.1	56.5	38.9	1	1	1	1	1	1	1	1	2.11785	High	0.821619	0.007204	0.06138	10.11	0.821619
[K].KEDTSDIENNEDISLEEILYETTER.[S]	2xTMT6plex [N-Term; K1]; 1xPhospho [T/S/Y]; 1xDeamidated [N]		1	6	PBANKA_091960	CCR4-NOT transcription complex subunit 2, putative (NOT2)	PBANKA_091960 [427-451]	1	3524.65		74.8	244.5	88.1	58.2	165.4	59	54.8	55.2	3.7	12	4.3	2.8	8.1	2.9	2.7	2.7	2	7.3	2.8	2	8.1	2.5	2.6	2.1	1	1	1	1	1	1	1	1	2.54907	High	0.457077	0.002152	0.01669	18.42	0.457077
[K].YTHNENENSMK.[E]	2xTMT6plex [N-Term; K11]; 1xOxidation [M10]		1	4	PBANKA_091910	parasitophorous vacuolar protein 1, putative (PV1)	PBANKA_091910 [155-165]	0	1840.89		70	136.5	58.9	102.5	59.6	120.3	119.6	132.5	12.5	24.3	10.5	18.2	10.6	21.4	21.3	23.6	6.8	14.8	6.8	12.8	10.6	18.5	20.6	18.3	2	2	2	2	2	2	2	2	1.91	High	0.798298	0.001584	0.01254	27.62	-0.303129
[K].GEISEFDTQIESK.[M]	2xTMT6plex [N-Term; K13]; 1xPhospho [S4(100)]	PBANKA_031430 1xPhospho [S1021(100)]	1	2	PBANKA_031430	conserved Plasmodium protein, unknown function	PBANKA_031430 [1018-1030]	0	2020.99		58.5	130.1	43.7	57.3	121.9	139.6	108.8	140.2	4.9	11	3.7	4.8	10.3	11.8	9.2	11.8	2.7	6.7	2.4	3.4	10.3	10.2	8.9	9.2	1	1	1	1	1	1	1	1	2.02881	High	1.9487	0.002625	0.02121	24.91	1.9487
[R].SNEGLVK.[E]	2xTMT6plex [N-Term; K7]; 1xPhospho [S1(100)]	PBANKA_140220 1xPhospho [S585(100)]	1	1	PBANKA_140220	conserved Plasmodium protein, unknown function	PBANKA_140220 [585-591]	0	1284.7	S1(Phospho): 100	72	111.9	81.6	169.9	74.1	100.2	85	105.3	50	77.8	56.7	118	51.5	69.6	59.1	73.1	27.3	47.4	36.8	82.9	51.5	60.2	57.2	56.8	1	1	1	1	1	1	1	1	2.19908	High	0.166095	0.00971	0.08672	7.58	0.166095
[K].ESLNSFDNLESTEK.[K]	2xTMT6plex [N-Term; K14]; 1xPhospho [S/T]	PBANKA_134320 1xPhospho [S1257(99.9)]	1	6	PBANKA_134320	conserved Plasmodium protein, unknown function	PBANKA_134320 [1253-1266]	0	2151.03		105.2	149.8	65.5	163.1	72.1	86.3	74.1	83.9	36.6	52.2	22.8	56.8	25.1	30.1	25.8	29.2	20	31.8	14.8	39.9	25.1	26	25	22.7	2	2	2	2	2	2	2	2	3.90239	High	-3.87255	0	6.686e-05	46.89	-3.87255
[K].VIDNISLENESDNNCENR.[E]	1xTMT6plex [N-Term]; 1xDeamidated [N]; 1xCarbamidomethyl [C15]; 1xPhospho [S6(99.5)]	PBANKA_071650 1xPhospho [S41(97.3)]	1	3	PBANKA_071650	RNA-binding protein, putative	PBANKA_071650 [31-48]	0	2445.04	S11(Phospho): 97.3	60	119.6	53	87.5	111.4	112.7	121.8	134	7.3	14.6	6.5	10.7	13.6	13.8	14.9	16.4	4	8.9	4.2	7.5	13.6	11.9	14.4	12.7	1	1	1	1	1	1	1	1	2.16276	High	0.479812	5.957e-05	0.0001833
[K].FGSESIQK.[N]	2xTMT6plex [N-Term; K8]; 1xPhospho [S5(98.9)]	PBANKA_144630 1xPhospho [S187(100)]	1	1	PBANKA_144630	pre-mRNA-splicing factor ATP-dependent RNA helicase PRP2, putative (PRP2)	PBANKA_144630 [185-192]	0	1433.74	S3(Phospho): 99.96	120.1	215.2	104.9	196.7	44.3	47.2	41.7	30	150	268.9	131.1	245.8	55.3	59	52.1	37.5	81.9	163.9	85.1	172.6	55.3	51	50.5	29.1	1	1	1	1	1	1	1	1	2.45781	High	0.43988	0.005386	0.04732	13.74	0.43988
[K].VQGSNNEK.[Q]	2xTMT6plex [N-Term; K8]; 1xPhospho [S4(100)]	PBANKA_080320 1xPhospho [S357(100)]	1	2	PBANKA_080320	inositol-phosphate phosphatase, putative	PBANKA_080320 [354-361]	0	1413.71		91.8	182.1	94.9	159.1	87.4	43.1	53.2	88.5	12.8	25.4	13.2	22.2	12.2	6	7.4	12.4	7	15.5	8.6	15.6	12.2	5.2	7.2	9.6	1	1	1	1	1	1	1	1	1.67962	High	-0.0205417	0.007772	0.06665	24.06	-0.0205417
[K].EETSIINHR.[T]	1xTMT6plex [N-Term]		1	2	PBANKA_130070	LCCL domain-containing protein (CCp1)	PBANKA_130070 [866-874]	0	1327.72		45.2	81	43.1	79.7	60.9	154.1	183.5	152.5	2.7	4.9	2.6	4.8	3.7	9.4	11.2	9.3	1.5	3	1.7	3.4	3.7	8.1	10.8	7.2	1	1	1	1	1	1	1	1	2.39221	High	1.05383	5.957e-05	0.0003413	35.14	1.05383
[K].NADLINGSNNNNSTTNSVNTSTISDESLK.[K]	2xTMT6plex [N-Term; K29]; 1xDeamidated [N]; 1xPhospho [S/T]		1	32	PBANKA_061320	DNA polymerase alpha, putative	PBANKA_061320 [539-567]	0	3563.68	S13(Phospho): 37.33; T14(Phospho): 37.33	85.4	129.2	68.4	153.3	76.6	109.1	135.2	42.9	7.7	11.6	6.2	13.8	6.9	9.8	12.2	3.9	4.2	7.1	4	9.7	6.9	8.5	11.8	3	1	1	1	1	1	1	1	1	2.85049	High	0.109933	0	2.557e-06	45.05	0.109933
[-].MDSDIIDEEFVYGK.[N]	1xPhospho [S3]; 1xTMT6plex [K14]; 1xAcetyl [N-Term]; 1xOxidation [M1]	PBANKA_091970 1xPhospho [S3]; 1xAcetyl [N-Term]	1	2	PBANKA_091970	conserved Plasmodium protein, unknown function	PBANKA_091970 [1-14]	0	2027.88		59.6	51.1	41.4	131	131.6	121.1	133	131.2	4.2	3.6	2.9	9.3	9.3	8.6	9.4	9.3	2.3	2.2	1.9	6.5	9.3	7.4	9.1	7.2	1	1	1	1	1	1	1	1						36.89	-0.322081
[K].ALEGSFISR.[H]	1xTMT6plex [N-Term]; 1xPhospho [S]	PBANKA_130400 1xPhospho [S262(100)]	1	1	PBANKA_130400	conserved Plasmodium protein, unknown function	PBANKA_130400 [258-266]	0	1288.65		88.6	143.4	93.5	187.7	64.7	80.1	76.5	65.4	33.2	53.6	35	70.2	24.2	29.9	28.6	24.5	18.1	32.7	22.7	49.3	24.2	25.9	27.7	19	1	1	1	1	1	1	1	1	2.07079	High	-3.05781	0.002253	0.01789	22.96	-3.05781
[R].DDESNNYVLDNDSNEELDK.[I]	2xTMT6plex [N-Term; K19]; 2xDeamidated [N11; N14]; 1xPhospho [S13(90.3)]	PBANKA_092640 1xPhospho [S246(90.3)]	1	3	PBANKA_092640	serine/threonine protein kinase, putative	PBANKA_092640 [234-252]	0	2768.17	S13(Phospho): 90.33		99.7	69	150.3	116.7	127.6	117.3	119.4		6.2	4.3	9.4	7.3	8	7.3	7.5		3.8	2.8	6.6	7.3	6.9	7.1	5.8		1	1	1	1	1	1	1	1.5537	High	16.4981	0.006037	0.05439	34.24	16.4981
[K].LNEFVENNEQNESEVSNNK.[N]	2xTMT6plex [N-Term; K19]; 2xDeamidated [Q/N]; 2xPhospho [S13(100); S16(100)]	PBANKA_050610 2xPhospho [S1485(100); S1488(100)]	1	5	PBANKA_050610	conserved Plasmodium protein, unknown function	PBANKA_050610 [1473-1491]	0	2857.22	S13(Phospho): 100; S16(Phospho): 100	89.4	47.4	47.3	198.1	72.3	169.3	143.7	32.6	4.9	2.6	2.6	11	4	9.4	8	1.8	2.7	1.6	1.7	7.7	4	8.1	7.7	1.4	1	1	1	1	1	1	1	1	2.90088	High	9.31063	0.0005205	0.002529	40.69	9.31063
[K].ENEDNENDSDYDGEHTGSNK.[E]	2xTMT6plex [N-Term; K20]; 2xPhospho [S9(88.3); Y/S/T]	PBANKA_132020 2xPhospho [S1375(88.3); S1384(88.3)]	1	3	PBANKA_132020	conserved Plasmodium protein, unknown function	PBANKA_132020 [1367-1386]	0	2887.1		50.1	67.3	101.4	206.4	95.8	92	110.8	76	11.7	15.7	23.7	48.3	22.4	21.5	25.9	17.8	6.4	9.6	15.4	33.9	22.4	18.6	25.1	13.8	1	1	1	1	1	1	1	1	3.45874	High	1.1947	5.957e-05	0.0003153	25.43	1.1947
[K].NNNNNNNNNDNNNNKPK.[E]	3xTMT6plex [N-Term; K15; K17]; 2xDeamidated [N]		1	22	PBANKA_140190	conserved Plasmodium protein, unknown function	PBANKA_140190 [153-169]	0	2659.3		54.7	193.4	92.1	70.9	136.2	140.2	54.9	57.7	3.3	11.6	5.5	4.3	8.2	8.4	3.3	3.5	1.8	7.1	3.6	3	8.2	7.3	3.2	2.7	1	1	1	1	1	1	1	1	2.84506	High	1.38873	0.00144	0.01096	62.61	1.20512
[K].DDESIKDQESVDEK.[R]	3xTMT6plex [N-Term; K6; K14]; 2xPhospho [S4(100); S10(100)]	PBANKA_113820 2xPhospho [S458(100); S464(100)]	1	3	PBANKA_113820	RuvB-like helicase 3, putative (RUVB3)	PBANKA_113820 [455-468]	1	2484.14	S4(Phospho): 100; S10(Phospho): 100	76.6	95.6	81.1	189	91.6	104	114.6	47.5	150.7	188.1	159.7	372.2	180.3	204.8	225.7	93.6	82.3	114.7	103.7	261.4	180.3	177.1	218.6	72.7	2	2	2	2	2	2	2	2	3.65907	High	1.3178	0.001171	0.008695	26.27	1.43524
[K].NNSLNIEEVR.[E]	1xTMT6plex [N-Term]; 1xPhospho [S3(100)]	PBANKA_130400 1xPhospho [S758(100)]	1	3	PBANKA_130400	conserved Plasmodium protein, unknown function	PBANKA_130400 [756-765]	0	1496.73	S3(Phospho): 100	105.8	179.9	94.2	180.8	58.4	61.1	60.5	59.4	126.9	215.9	113.1	217	70.1	73.3	72.6	71.3	69.3	131.6	73.4	152.4	70.1	63.4	70.3	55.4	2	2	2	2	2	2	2	2	3.70274	High	1.55427	8.7e-05	0.0004325	26.85	1.55427
[K].HMIHNNCIMNISFNPFMPNMFCTCSSDNTIK.[I]	1xPhospho [S/T]; 1xTMT6plex [K31]; 1xAcetyl [N-Term]; 1xDeamidated [N]	PBANKA_135690 1xPhospho [S/T]; 1xAcetyl [N-Term]	1	6	PBANKA_135690	U4/U6 small nuclear ribonucleoprotein PRP4, putative (PRPF4)	PBANKA_135690 [483-513]	0	3956.67		36.2	79	39.9	56.3	107.4	152.8	105.8	222.6	2.9	6.4	3.2	4.6	8.7	12.4	8.6	18	1.6	3.9	2.1	3.2	8.7	10.7	8.3	14	1	1	1	1	1	1	1	1						27.61	-0.196923
[K].TNNSNEQNDNANNEENK.[T]	2xTMT6plex [N-Term; K17]; 1xPhospho [T/S]	PBANKA_135370 1xPhospho [S193(97.5)]	1	2	PBANKA_135370	nucleolar complex protein 2, putative	PBANKA_135370 [190-206]	0	2487.08		83.1	135.3	63.5	127.3	33	101.8	132	123.9	6	9.8	4.6	9.3	2.4	7.4	9.6	9	3.3	6	3	6.5	2.4	6.4	9.3	7	1	1	1	1	1	1	1	1	1.65646	High	2.35075	0.0006943	0.003758	37.44	2.35075
[K].KDTSTYNDTQTIK.[L]	3xTMT6plex [N-Term; K1; K13]; 1xPhospho [T3(98.4)]	PBANKA_133090 1xPhospho [T506(98.4)]	1	4	PBANKA_133090	conserved Plasmodium protein, unknown function	PBANKA_133090 [504-516]	1	2282.19		118.4	215.8	119.8	212.2	34.5	36	29.8	33.5	175.8	320.5	177.9	315.3	51.3	53.5	44.3	49.7	96	195.4	115.5	221.4	51.3	46.3	42.9	38.6	2	2	2	2	2	2	2	2	3.61464	High	-0.468096	0	9.709e-05	21.77	-0.468096
[K].SITIQEEK.[N]	2xTMT6plex [N-Term; K8]; 1xPhospho [T/S]	PBANKA_123005 1xPhospho [S512(100)]	1	1	PBANKA_123005	ribonuclease, putative, fragment	PBANKA_123005 [512-519]	0	1485.8		93.2	160.5	93	173.7	72.9	73.1	61.5	72	35.5	61.2	35.4	66.2	27.8	27.9	23.4	27.4	19.4	37.3	23	46.5	27.8	24.1	22.7	21.3	1	1	1	1	1	1	1	1	1.83475	High	0.876177	0.002742	0.02362	7.74	0.876177
[K].TESEISYDNDDK.[T]	2xTMT6plex [N-Term; K12]; 2xPhospho [S3(88.9); Y/S/T]	PBANKA_080250 2xPhospho [S502; S505]	1	1	PBANKA_080250	conserved Plasmodium protein, unknown function	PBANKA_080250 [500-511]	0	2033.84		46.2	132.2	98.6	127.1	106.5	89	122	78.4	7.5	21.5	16	20.6	17.3	14.5	19.8	12.7	4.1	13.1	10.4	14.5	17.3	12.5	19.2	9.9	1	1	1	1	1	1	1	1	1.70863	Medium	-3.42623	0.01628	0.1614	33.72	-3.42623
[K].KDDIINGSEADTSTSGTSMTLTR.[S]	2xTMT6plex [N-Term; K1]; 1xDeamidated [N6]; 1xOxidation [M19]; 1xPhospho [T/S]		1	6	PBANKA_134450	conserved Plasmodium protein, unknown function	PBANKA_134450 [1964-1986]	1	2955.39	T22(Phospho): 42.77	31.1	132.4	90.5	85.7	121	112.1	116.9	110.3	4.4	18.7	12.8	12.1	17.1	15.8	16.5	15.6	2.4	11.4	8.3	8.5	17.1	13.7	16	12.1	1	1	1	1	1	1	1	1	1.42533	High	0.283959	0.001171	0.008926
[K].TSDGITYNNEQGNK.[I]	2xTMT6plex [N-Term; K14]; 1xPhospho [S2(90.9)]		1	8	PBANKA_082070	TLD domain-containing protein	PBANKA_082070 [499-512]	0	2078.98	S2(Phospho): 90.89	71.3	122.4	60.8	114.1	71.9	131.1	79.1	149.3	149.1	255.9	127.1	238.6	150.4	274.2	165.3	312.1	81.4	156	82.5	167.6	150.4	237.1	160.1	242.4	3	3	3	3	3	3	3	3	4.71951	High	0.28763	0	3.787e-06	43.53	0.28763
[K].ELQEQMNEDEDVEDTIEGLVQSAEIISFNK.[L]	2xTMT6plex [N-Term; K30]; 1xPhospho [T/S]; 1xDeamidated [N/Q]; 1xOxidation [M6]	PBANKA_121890 1xPhospho [S148(95.9)]	1	7	PBANKA_121890	elongation factor 1 (EF-1), putative	PBANKA_121890 [127-156]	0	4007.86	S22(Phospho): 95.93	65.2	101.5	40.4	90.7	71.2	80.2	152.9	197.9	3.5	5.4	2.2	4.8	3.8	4.3	8.2	10.6	1.9	3.3	1.4	3.4	3.8	3.7	7.9	8.2	1	1	1	1	1	1	1	1	3.6373	High	6.73238	0	8.064e-06	57.38	6.73238
[K].SRNSCDTINNK.[L]	2xTMT6plex [N-Term; K11]; 1xCarbamidomethyl [C5]; 1xPhospho [S4(100)]	PBANKA_145830 1xPhospho [S519(100)]	1	1	PBANKA_145830	kinesin-13, putative	PBANKA_145830 [516-526]	1	1846.89	S4(Phospho): 99.99	108	229.5	101.3	144.7	47.6	63.6	45.3	60	35	74.3	32.8	46.8	15.4	20.6	14.7	19.4	19.1	45.3	21.3	32.9	15.4	17.8	14.2	15.1	1	1	1	1	1	1	1	1	1.79032	High	1.41887	0.001384	0.01056
[R].YTNSICSSGTEK.[Y]	2xTMT6plex [N-Term; K12]; 1xPhospho [T/S]	PBANKA_051050 1xPhospho [T/S]	1	2	PBANKA_051050	conserved Plasmodium protein, unknown function	PBANKA_051050 [766-777]	0	1827.86		55.5	122.9	88.2	134.3	120.4	97.4	108.7	72.6	6.6	14.6	10.5	15.9	14.3	11.6	12.9	8.6	3.6	8.9	6.8	11.2	14.3	10	12.5	6.7	1	1	1	1	1	1	1	1						33.63	-0.190806
[K].DEVSEEEDDEENDEEESNEHNK.[N]	2xTMT6plex [N-Term; K22]; 1xDeamidated [N12]; 2xPhospho [S4(100); S17(100)]	PBANKA_080230 2xPhospho [S192(100); S205(100)]	1	2	PBANKA_080230	E3 ubiquitin-protein ligase, putative	PBANKA_080230 [189-210]	0	3269.21	S4(Phospho): 100; S17(Phospho): 100	38	84.4	109.2	178	98.3	88.9	107.7	95.5	5.7	12.6	16.3	26.6	14.7	13.3	16.1	14.3	3.1	7.7	10.6	18.7	14.7	11.5	15.6	11.1	1	1	1	1	1	1	1	1	2.55584	High	5.41083	0.0008012	0.004786	25.77	5.41083
[K].EEAFNGDYDTDISGNIR.[R]	1xTMT6plex [N-Term]; 2xPhospho [T10(97.5); S13(100)]	PBANKA_103870 2xPhospho [T953(97.5); S956(100)]	1	2	PBANKA_103870	conserved Plasmodium protein, unknown function	PBANKA_103870 [944-960]	0	2304.93	T10(Phospho): 97.53; S13(Phospho): 100	77.4	163.1	70.8	100.9	109.4	106.4	74.4	97.6	6.2	13.1	5.7	8.1	8.8	8.6	6	7.9	3.4	8	3.7	5.7	8.8	7.4	5.8	6.1	1	1	1	1	1	1	1	1	2.84837	High	2.18248	0.0006378	0.003055	46.48	2.18248
[R].NIDNDDSNNSSSNYNNNSTK.[N]	2xTMT6plex [N-Term; K20]		1	2	PBANKA_140190	conserved Plasmodium protein, unknown function	PBANKA_140190 [133-152]	0	2675.22		59	115.6	37.2	55.9	97.6	143.1	136.1	155.5	5.9	11.5	3.7	5.6	9.7	14.2	13.5	15.5	3.2	7	2.4	3.9	9.7	12.3	13.1	12	1	1	1	1	1	1	1	1	2.45529	High	1.70517	0	8.2e-05	64.76	1.70517
[K].SLQNFNNHNPR.[L]	1xTMT6plex [N-Term]; 1xPhospho [S1(100)]	PBANKA_080280 1xPhospho [S419(100)]	1	3	PBANKA_080280	conserved Plasmodium protein, unknown function	PBANKA_080280 [419-429]	0	1649.77		85.7	143.1	84.9	160.8	70.4	86.8	75.1	93.2	65.8	109.7	65.2	123.3	54	66.6	57.6	71.5	35.9	66.9	42.3	86.6	54	57.6	55.8	55.5	2	2	2	2	2	2	2	2	4.70346	High	1.81788	0	1.698e-06	56.37	1.81788
[R].SESNSQISPYK.[I]	2xTMT6plex [N-Term; K11]; 1xPhospho [S/Y]		1	1	PBANKA_092830	conserved Plasmodium protein, unknown function	PBANKA_092830 [904-914]	0	1777.88		86.9	150.9	85.9	156.1	79.2	84.6	72.8	83.5	42.9	74.5	42.4	77	39.1	41.7	35.9	41.2	23.4	45.4	27.5	54.1	39.1	36.1	34.8	32	1	1	1	1	1	1	1	1	3.19042	High	-6.18689	0.006679	0.05862	32.57	-4.73746
[K].NNGDDNENDDDGDDDDEDENDEDDDDANGNKK.[N]	3xTMT6plex [N-Term; K31; K32]; 5xDeamidated [N2; N6; N8; N20; N28]		1	1	PBANKA_102350	conserved Plasmodium protein, unknown function	PBANKA_102350 [94-125]	1	4249.59		85.6	58.8	52.8	186.3	160.4	66.6	125.4	64.2	5.5	3.8	3.4	12	10.3	4.3	8.1	4.1	3	2.3	2.2	8.4	10.3	3.7	7.8	3.2	1	1	1	1	1	1	1	1						25.81	15.7999
[-].MEINCNSKYHETPINLMSNQNNK.[T]	3xPhospho [S/T/Y]; 2xTMT6plex [K8; K23]; 1xAcetyl [N-Term]; 4xDeamidated [N15; N19; Q20; N21]; 1xOxidation [M1]	PBANKA_144980 3xPhospho [S18; Y/T/S]; 1xAcetyl [N-Term]	1	3	PBANKA_144980	inorganic pyrophosphatase, putative (VP2)	PBANKA_144980 [1-23]	1	3482.4		46.9	99.1	78.9	122.5	89.3	110.9	97.7	154.7	7.1	15.1	12	18.7	13.6	16.9	14.9	23.6	3.9	9.2	7.8	13.1	13.6	14.6	14.4	18.3	1	1	1	1	1	1	1	1						34.23	-0.741526
[K].SQNEDNTIILSSTSPQNSNALSK.[K]	2xTMT6plex [N-Term; K23]; 3xDeamidated [Q2; Q16; N19]; 1xPhospho [S/T]		1	4	PBANKA_100580	conserved Plasmodium protein, unknown function	PBANKA_100580 [195-217]	0	2989.43	S11(Phospho): 24.7; S12(Phospho): 24.7; T13(Phospho): 24.7; S14(Phospho): 24.7	64.4	110.5	61.7	112.6	108.4	136.6	108.9	96.8	6.6	11.3	6.3	11.5	11.1	14	11.2	9.9	3.6	6.9	4.1	8.1	11.1	12.1	10.8	7.7	1	1	1	1	1	1	1	1	2.23635	High	12.9251	0.0001278	0.0008074
[K].SNSQNIPYIK.[N]	2xTMT6plex [N-Term; K10]; 1xPhospho [S/Y]		1	2	PBANKA_031160	conserved Plasmodium protein, unknown function	PBANKA_031160 [903-912]	0	1701.9		92.4	183.4	101.8	158.4	70	57.8	67.1	69.1	35	69.4	38.5	59.9	26.5	21.9	25.4	26.1	19.1	42.3	25	42.1	26.5	18.9	24.6	20.3	1	1	1	1	1	1	1	1	3.12425	High	0.771297	0.008499	0.0738	16.55	0.771297
[K].NYDPDSQNGNVHNR.[D]	1xTMT6plex [N-Term]; 1xDeamidated [N]		1	6	PBANKA_020480	secreted ookinete protein, putative (PSOP24)	PBANKA_020480 [240-253]	0	1859.85		76.9		76.8	134.5	99.7	185.1	162.6	64.2	2.9		2.9	5.1	3.8	7.1	6.2	2.4	1.6		1.9	3.6	3.8	6.1	6	1.9	1		1	1	1	1	1	1	1.99004	High	-0.144786	0.001065	0.008463	27.67	1.43044
[R].SRENFEDIIDTK.[S]	2xTMT6plex [N-Term; K12]; 1xPhospho [T/S]	PBANKA_060200 1xPhospho [S432(100)]	1	1	PBANKA_060200	origin recognition complex subunit 1, putative (ORC1)	PBANKA_060200 [432-443]	1	2005		112.8	164.2	81.5	176.9	59.4	58.3	78.1	68.6	31.3	45.6	22.6	49.1	16.5	16.2	21.7	19.1	17.1	27.8	14.7	34.5	16.5	14	21	14.8	1	1	1	1	1	1	1	1	2.72482	High	0.796284	0.000861	0.005976	23.25	0.796284
[K].HENNNTNGTVNNFPNK.[N]	2xTMT6plex [N-Term; K16]; 1xDeamidated [N7]; 1xPhospho [T6(99.9)]	PBANKA_080410 1xPhospho [T273(99.9)]	1	2	PBANKA_080410	conserved Plasmodium protein, unknown function	PBANKA_080410 [268-283]	0	2353.1	T6(Phospho): 99.92	41.4	91.6	87	134.1	130.6	81.3	83	151.1	6.6	14.6	13.9	21.4	20.8	13	13.2	24.1	3.6	8.9	9	15	20.8	11.2	12.8	18.7	1	1	1	1	1	1	1	1	2.0325	High	-1.20955	0.0003306	0.00147	30.7	-1.20955
[R].NYGSGQLSEFEEESKEEQEMEK.[E]	3xTMT6plex [N-Term; K15; K22]; 1xOxidation [M20]; 1xPhospho [S8(85.9)]	PBANKA_143470 1xPhospho [S1369(85.9)]	1	6	PBANKA_143470	clathrin heavy chain, putative	PBANKA_143470 [1362-1383]	1	3390.55	S4(Phospho): 44.38; S8(Phospho): 44.38	92	123	82.6	183.1	85.5	89.8	93.3	50.7	24.5	32.8	22	48.8	22.8	23.9	24.9	13.5	13.4	20	14.3	34.3	22.8	20.7	24.1	10.5	2	2	2	2	2	2	2	2	3.05921	High	0.982982	0	7.341e-05	35.94	0.982982
[R].MASYINGSEK.[T]	2xTMT6plex [N-Term; K10]; 1xDeamidated [N6]; 1xOxidation [M1]; 1xPhospho [S3(97.3)]	PBANKA_092770 1xPhospho [S1328]	1	1	PBANKA_092770	conserved Plasmodium protein, unknown function	PBANKA_092770 [1326-1335]	0	1654.78	S3(Phospho): 97.26	91.6	170	97.8	161.6	70.4	74.1	60.6	73.9	43.6	80.9	46.5	76.9	33.5	35.3	28.8	35.2	23.8	49.3	30.2	54	33.5	30.5	27.9	27.3	1	1	1	1	1	1	1	1	1.70939	Medium	2.799	0.04918	0.4455	30.26	2.799
[K].YTYSQMGSSNK.[N]	2xTMT6plex [N-Term; K11]; 1xOxidation [M6]; 1xPhospho [Y1(78.4)]		1	8	PBANKA_040210	spindle pole body protein, putative	PBANKA_040210 [632-642]	0	1819.83	S8(Phospho): 50; S9(Phospho): 50	103.3	181.7	107.7	187.9	52.7	60.8	55.4	50.5	198.7	349.4	207.2	361.4	101.3	117	106.6	97.2	108.5	213	134.5	253.8	101.3	101.2	103.2	75.5	3	3	3	3	3	3	3	3	3.44799	High	0.797595	0.0001278	0.0007605	44.45	0.294512
[R].NEDIDKELYIEANTNSDENENK.[-]	3xTMT6plex [N-Term; K6; K22]; 1xDeamidated [N15]; 2xPhospho [T14(95.5); S16(89.2)]	PBANKA_080440 2xPhospho [T1801(95.5); S1803(89.2)]	1	1	PBANKA_080440	conserved Plasmodium protein, unknown function	PBANKA_080440 [1788-1809]	1	3445.55	T14(Phospho): 95.5; S16(Phospho): 89.23	54.9	109.7	72.2	111.7	137.6	110.2	93.7	109.9	7.1	14.3	9.4	14.5	17.9	14.3	12.2	14.3	3.9	8.7	6.1	10.2	17.9	12.4	11.8	11.1	1	1	1	1	1	1	1	1	2.01161	High	7.59254	0.002378	0.01928	28.32	7.25207
[K].KKETFYDSNDEENQNSNYK.[L]	4xTMT6plex [N-Term; K1; K2; K19]; 2xPhospho [Y/S/T]	PBANKA_121990 2xPhospho [T1048(93.4); S1052(78.2)]	1	1	PBANKA_121990	Cg7 protein, putative	PBANKA_121990 [1045-1063]	2	3429.61		96.6	180.5	80	127.5	82.2	85.3	77.1	70.8	34.4	64.3	28.5	45.4	29.3	30.4	27.5	25.2	18.8	39.2	18.5	31.9	29.3	26.3	26.6	19.6	1	1	1	1	1	1	1	1	3.15206	High	-0.291254	0.003838	0.03166	21.01	-0.291254
[K].IEGLNNDQTSSLSILNRNTDENNNK.[I]	1xTMT6plex [K25]; 1xAcetyl [N-Term]; 5xDeamidated [N6; Q8; N16; N18; N22]	PBANKA_050320 1xAcetyl [N-Term]	1	1	PBANKA_050320	eukaryotic translation initiation factor subunit eIF2A, putative	PBANKA_050320 [234-258]	1	3079.44		47	87.3	59.3	96.7	144.9	70	155.3	139.4	2.6	4.8	3.2	5.3	7.9	3.8	8.5	7.6	1.4	2.9	2.1	3.7	7.9	3.3	8.2	5.9	1	1	1	1	1	1	1	1						16.48	2.48353
[K].NNTGSGTLSNK.[N]	2xTMT6plex [N-Term; K11]; 1xPhospho [S5(84.9)]; 1xDeamidated [N1]	PBANKA_144300 1xPhospho [S600(97.6)]	1	4	PBANKA_144300	NIMA related kinase 1, putative (NEK1)	PBANKA_144300 [596-606]	0	1631.8		97.2	172.9	93.4	158.5	67.2	81.8	64.5	64.4	41.2	73.3	39.6	67.2	28.5	34.7	27.4	27.3	22.5	44.7	25.7	47.2	28.5	30	26.5	21.2	1	1	1	1	1	1	1	1	3.26024	High	1.02898	0.0004851	0.002212	31.14	1.02898
[K].NISSIDEYNMK.[I]	2xTMT6plex [N-Term; K11]; 1xPhospho [S/Y]; 1xOxidation [M10]	PBANKA_091360 1xPhospho [S310]	1	1	PBANKA_091360	conserved Plasmodium protein, unknown function	PBANKA_091360 [307-317]	0	1867.89		83.4	140.9	92.6	165.1	73.4	94.4	70.1	80.2	19.4	32.8	21.6	38.4	17.1	22	16.3	18.7	10.6	20	14	27	17.1	19	15.8	14.5	1	1	1	1	1	1	1	1	2.00574	Medium	-3.35066	0.02505	0.2503	38.09	-3.35066
[K].NSTQIENIENTQLLYNDGNNSDAMSATK.[C]	2xTMT6plex [N-Term; K28]; 1xPhospho [Y/T/S]; 2xDeamidated [Q/N]; 1xOxidation [M24]		1	4	PBANKA_141570	transcription factor with AP2 domain(s), putative (ApiAP2)	PBANKA_141570 [840-867]	0	3641.66		63.1	137	51.1	64.2	112.7	113.5	135.5	122.9	4.8	10.3	3.9	4.8	8.5	8.6	10.2	9.3	2.6	6.3	2.5	3.4	8.5	7.4	9.9	7.2	1	1	1	1	1	1	1	1	2.11326	High	10.5177	0.0001278	0.0007755	47.96	10.5177
[K].GNEDENSEDELLYEQAEIDDNENNNDK.[H]	2xTMT6plex [N-Term; K27]		1	4	PBANKA_041170	co-chaperone p23, putative	PBANKA_041170 [245-271]	0	3613.59		66.9	103	71.1	135.9	98.7	117.1	99.3	108.1	10.4	16.1	11.1	21.2	15.4	18.3	15.5	16.9	5.7	9.8	7.2	14.9	15.4	15.8	15	13.1	2	2	2	2	2	2	2	2	4.01367	High	1.59969	0	5.082e-08	68.45	1.59969
[K].SNNYSNIEDEHNNNSNK.[K]	2xTMT6plex [N-Term; K17]		1	2	PBANKA_140350	conserved Plasmodium protein, unknown function	PBANKA_140350 [461-477]	0	2451.15		101.6	104.4	45.2	149.8	92.2	101.9	110.4	94.5	12.5	12.8	5.5	18.4	11.3	12.5	13.5	11.6	6.8	7.8	3.6	12.9	11.3	10.8	13.1	9	1	1	1	1	1	1	1	1	1.77742	High	-0.181855	0.00054	0.002573	27.27	-0.181855
[K].MNSNAYEENDSFVGEHNNK.[N]	2xTMT6plex [N-Term; K19]; 2xDeamidated [N]; 1xOxidation [M1]; 1xPhospho [S11(83.2)]	PBANKA_060560 1xPhospho [S1886(82.6)]	1	16	PBANKA_060560	conserved Plasmodium protein, unknown function	PBANKA_060560 [1876-1894]	0	2755.16	S11(Phospho): 83.25	109	197.8	105.4	174	55.9	59.2	38.3	60.5	20.9	37.9	20.2	33.3	10.7	11.3	7.3	11.6	11.4	23.1	13.1	23.4	10.7	9.8	7.1	9	1	1	1	1	1	1	1	1	2.27797	High	6.94375	0.0006554	0.003084	33.8	6.94375
[R].NDNNGNTMNNNLTDDNNSSLFK.[D]	2xTMT6plex [N-Term; K22]; 1xPhospho [T/S]; 2xDeamidated [N6; N9]; 1xOxidation [M8]	PBANKA_080360 1xPhospho [S679(87.5)]	1	2	PBANKA_080360	importin-7, putative	PBANKA_080360 [662-683]	0	3012.29		84.9	108.4	57.1	135.4	126.4	97.9	95.8	94.1	7.3	9.4	4.9	11.7	10.9	8.4	8.3	8.1	4	5.7	3.2	8.2	10.9	7.3	8	6.3	1	1	1	1	1	1	1	1	2.37133	High	7.38829	0.0001929	0.0009895	44.14	7.38829
[K].TFNLDDTDTNYEN.[-]	1xTMT6plex [N-Term]; 1xPhospho [T/Y]	PBANKA_114570 1xPhospho [T169(85.4)]	1	7	PBANKA_114570	U2 small nuclear ribonucleoprotein A', putative	PBANKA_114570 [163-175]	0	1870.76		75.6	93.2	47.1	119	123.3	111.5	109.6	120.8	14.1	17.4	8.8	22.2	23	20.8	20.4	22.5	7.7	10.6	5.7	15.6	23	18	19.8	17.5	1	2	2	2	2	2	2	2	2.49942	High	1.28068	0.002541	0.02095	56.31	-0.977693
[K].NDTTSNDDEEQINTEDYYDEKRSDK.[N]	3xTMT6plex [N-Term; K21; K25]; 1xDeamidated [N13]; 2xPhospho [T/S/Y]	PBANKA_145460 2xPhospho [S676(86.2); S/T/Y]	1	1	PBANKA_145460	conserved Plasmodium protein, unknown function	PBANKA_145460 [654-678]	2	3872.65	S5(Phospho): 74.33; S23(Phospho): 86.19	70.9	103	69.3	139.4	116.2	108.4	95.7	97.1	13.6	19.7	13.2	26.6	22.2	20.7	18.3	18.5	7.4	12	8.6	18.7	22.2	17.9	17.7	14.4	1	1	1	1	1	1	1	1	2.69962	High	5.97756	0.004097	0.03379	21.42	5.97756
[R].DADEEEIEENYTDRSNIEFGQNQNLSNK.[K]	2xTMT6plex [N-Term; K28]; 2xDeamidated [N10; N16]; 1xPhospho [Y/T/S]		1	5	PBANKA_060740	protein phosphatase, putative	PBANKA_060740 [1148-1175]	1	3841.7	Y11(Phospho): 33.07; T12(Phospho): 33.07; S15(Phospho): 33.07	42.2	129.2	94.1	105.9	100	112.6	131.6	84.3	4.8	14.6	10.6	12	11.3	12.7	14.9	9.5	2.6	8.9	6.9	8.4	11.3	11	14.4	7.4	1	1	1	1	1	1	1	1	2.23992	High	5.74773	0.0002156	0.001054	18.77	5.74773
[R].AAVPSGASTGIYEALELR.[D]	1xTMT6plex [N-Term]; 1xPhospho [S/Y/T]		13	5	PBANKA_121430	enolase, putative (ENO)	PBANKA_121430 [35-52]	0	2114.07		73.2	92.8	23.9	75.9	122.1	174.5	160.4	77.2	6.6	8.4	2.2	6.8	11	15.7	14.5	7	3.6	5.1	1.4	4.8	11	13.6	14	5.4	2	2	1	2	2	2	2	2	4.47	High	-2.48356	0	6.974e-09	74.81	-2.48356
[K].NNGDDNENDDDGDDDDEDENDEDDDDANGNK.[K]	2xTMT6plex [N-Term; K31]; 3xDeamidated [N8; N20; N28]		1	2	PBANKA_102350	conserved Plasmodium protein, unknown function	PBANKA_102350 [94-124]	0	3890.37		70.4	126.1		116.3	165.7	177.7	143.8		2.9	5.2		4.8	6.9	7.4	6		1.6	3.2		3.4	6.9	6.4	5.8		1	1		1	1	1	1		1.70685	High	10.5253	0.0002156	0.001061	26.15	10.5253
[K].NENVKEDISSSDITMDIPK.[C]	3xTMT6plex [N-Term; K5; K19]; 1xOxidation [M15]; 2xPhospho [S/T]		1	5	PBANKA_100610	flap endonuclease 1, putative (FEN1)	PBANKA_100610 [454-472]	1	2998.43	S9(Phospho): 65.7; S10(Phospho): 65.7; S11(Phospho): 65.7	59.5	63.1	76	169.6	90.2	122.4	115.5	103.8	4.9	5.2	6.3	14.1	7.5	10.2	9.6	8.6	2.7	3.2	4.1	9.9	7.5	8.8	9.3	6.7	1	1	1	1	1	1	1	1	2.43825	High	0.850638	0.008033	0.0695	43.35	0.850638
[K].DKESDDIEKEEK.[E]	4xTMT6plex [N-Term; K2; K9; K12]; 1xPhospho [S4(100)]	PBANKA_010560 1xPhospho [S263(100)]	1	1	PBANKA_010560	translation initiation factor IF-2, putative	PBANKA_010560 [260-271]	2	2461.29	S4(Phospho): 100	66.7	104.5	89.2	164.2	85	115.8	115.5	59	50.6	79.2	67.6	124.4	64.4	87.8	87.6	44.7	27.6	48.3	43.9	87.4	64.4	75.9	84.8	34.7	1	1	1	1	1	1	1	1	3.00029	High	-0.133455	0.009249	0.08127
[K].SNLIDDDGVIIPSPILEKDSR.[G]	2xTMT6plex [N-Term; K18]; 1xPhospho [S20(87.2)]	PBANKA_093900 1xPhospho [S613(87.2)]	1	3	PBANKA_093900	ion channel protein, putative	PBANKA_093900 [594-614]	1	2834.5	S20(Phospho): 87.19	80	181.5	51.6	43.5	129.5	126.2	112.7	75	5.5	12.5	3.5	3	8.9	8.7	7.7	5.2	3	7.6	2.3	2.1	8.9	7.5	7.5	4	1	1	1	1	1	1	1	1	2.23871	High	4.86546	0.0006213	0.002916	34.55	4.86546
[K].NISSNDINNTSK.[K]	2xTMT6plex [N-Term; K12]; 1xPhospho [S3(93)]	PBANKA_041500 1xPhospho [S231(93)]	1	9	PBANKA_041500	Maf-like protein, putative	PBANKA_041500 [229-240]	0	1844.92	S3(Phospho): 93	93	168.1	103	169.5	75.8	62.4	65.2	63	46.7	84.5	51.8	85.1	38.1	31.3	32.7	31.7	25.5	51.5	33.6	59.8	38.1	27.1	31.7	24.6	1	1	1	1	1	1	1	1	3.33866	High	1.59798	0.0004851	0.002161	52.55	1.59798
[K].ETIEENELNEIDELQTDSYDKENPHR.[N]	2xTMT6plex [N-Term; K21]; 1xPhospho [S/Y/T]; 1xDeamidated [Q/N]		1	12	PBANKA_121680	conserved Plasmodium protein, unknown function	PBANKA_121680 [512-537]	1	3699.7			121	69.6	120.2	109.4	126.5	109.3	143.9		10.2	5.9	10.1	9.2	10.6	9.2	12.1		6.2	3.8	7.1	9.2	9.2	8.9	9.4		1	1	1	1	1	1	1	1.92796	High	7.54994	0.0008111	0.004905	20.27	7.54994
[R].QDDNENSDEEGAEINNDMQGDMNK.[T]	2xTMT6plex [N-Term; K24]; 1xPhospho [S7]; 2xDeamidated [N16; Q/N]; 2xOxidation [M18; M22]	PBANKA_132390 1xPhospho [S142]	1	2	PBANKA_132390	conserved Plasmodium protein, unknown function	PBANKA_132390 [136-159]	0	3284.28		67.8	76.6	64.5	149.1	127.2	46.6	131.4	136.9	4.2	4.8	4	9.3	7.9	2.9	8.2	8.5	2.3	2.9	2.6	6.5	7.9	2.5	7.9	6.6	1	1	1	1	1	1	1	1						27.32	8.87897
[K].DNNLSDSVLSSYK.[L]	2xTMT6plex [N-Term; K13]; 1xDeamidated [N3]; 2xPhospho [S/Y]	PBANKA_135790 2xPhospho [S126(99.7); S131(86)]	1	1	PBANKA_135790	conserved Plasmodium protein, unknown function	PBANKA_135790 [122-134]	0	2060.92	S5(Phospho): 99.67; S10(Phospho): 86.01	50.9	139	125.2	163.2	120.2	81.9	91.8	27.7	7.3	20	18	23.5	17.3	11.8	13.2	4	4	12.2	11.7	16.5	17.3	10.2	12.8	3.1	1	1	1	1	1	1	1	1	2.53281	High	4.35265	0.007578	0.06405	17.41	4.35265
[R].YSSFESDVQASK.[Q]	2xTMT6plex [N-Term; K12]; 1xPhospho [S/Y]	PBANKA_020270 1xPhospho [S42(100)]	1	12	PBANKA_020270	kinesin-8, putative	PBANKA_020270 [37-48]	0	1885.9		114.4	184.6	103.1	188.8	55.9	52	53	48.2	223.8	361	201.8	369.4	109.3	101.8	103.7	94.2	122.2	220.1	131	259.4	109.3	88	100.4	73.2	5	5	5	5	5	5	5	4	3.66388	High	0.440175	0.0004851	0.002433	54.71	0.9004
[K].GDNENAGDGLSNDEGRNSADSK.[H]	2xTMT6plex [N-Term; K22]; 3xPhospho [S11(100); S18; S21]	PBANKA_135930 3xPhospho [S2004(100); S2011(100); S2014(100)]	1	2	PBANKA_135930	conserved Plasmodium protein, unknown function	PBANKA_135930 [1994-2015]	1	2920.14		29.1	98.7	80.5	89.3	75.6	73.9	69.9	283	7	23.6	19.3	21.4	18.1	17.7	16.7	67.7	3.8	14.4	12.5	15	18.1	15.3	16.2	52.6	1	1	1	1	1	1	1	1	2.91015	High	-0.994137	0.0006213	0.002992	11.64	-0.994137
[R].MDILSRGGTQEIEHR.[D]	1xTMT6plex [N-Term]; 2xPhospho [S5(100); T9(100)]	PBANKA_030250 2xPhospho [S10(100); T14(100)]	1	1	PBANKA_030250	hexose transporter (HT)	PBANKA_030250 [6-20]	1	2130.96	S5(Phospho): 100; T9(Phospho): 100	75.6	114.1	74	141.7	66.1	119.6	73.5	135.4	13.4	20.2	13.1	25.1	11.7	21.2	13	23.9	7.3	12.3	8.5	17.6	11.7	18.3	12.6	18.6	1	1	1	1	1	1	1	1	2.03879	High	-2.94098	0.001584	0.01258
[R].NSDISDVENIQSNSDNESNDVGVLK.[R]	2xTMT6plex [N-Term; K25]; 2xPhospho [S]	PBANKA_030940 2xPhospho [S3376(85.1); S]	1	2	PBANKA_030940	conserved Plasmodium protein, unknown function	PBANKA_030940 [3372-3396]	0	3310.48		95.3	222.6	87.1	90.2	67.9	94.2	70.1	72.8	4.2	9.8	3.9	4	3	4.2	3.1	3.2	2.3	6	2.5	2.8	3	3.6	3	2.5	1	1	1	1	1	1	1	1	1.78352	High	0.993892	0.0008012	0.004722	35.6	0.993892
[K].HSESSEVDDNNNNNHNGKDK.[E]	3xTMT6plex [N-Term; K18; K20]; 1xDeamidated [N16]; 1xPhospho [S]		1	2	PBANKA_112010	conserved Plasmodium protein, unknown function	PBANKA_112010 [1011-1030]	1	3022.37	S4(Phospho): 49.43; S5(Phospho): 49.43	57.4	99.6	54.5	92.2	124.4	107.6	106.6	157.6	5.7	9.8	5.4	9.1	12.3	10.6	10.5	15.6	3.1	6	3.5	6.4	12.3	9.2	10.2	12.1	1	1	1	1	1	1	1	1	1.74208	High	2.16055	0.0002581	0.001152	11.93	0.367697
[K].HYLASSASTSEEIQEDIEK.[K]	2xTMT6plex [N-Term; K19]; 1xPhospho [S/Y/T]		1	10	PBANKA_061320	DNA polymerase alpha, putative	PBANKA_061320 [970-988]	0	2675.29	S5(Phospho): 49.09; S6(Phospho): 49.09	43.6	62.5	67.8	128.8	101.2	119.7	133.9	142.5	3.7	5.2	5.7	10.8	8.5	10.1	11.3	12	2	3.2	3.7	7.6	8.5	8.7	10.9	9.3	1	1	1	1	1	1	1	1	2.79167	High	-4.18648	0	7.79e-05	39.59	-4.18648
[K].SNFFESNYENYNNNNDDNNER.[N]	1xTMT6plex [N-Term]; 1xPhospho [Y/S]; 2xDeamidated [N]	PBANKA_134320 1xPhospho [S2109(87.2)]	1	10	PBANKA_134320	conserved Plasmodium protein, unknown function	PBANKA_134320 [2104-2124]	0	2924.11	S6(Phospho): 93.05	65.3	65.2	57	144.4	113.7	128.4	77.8	148.2	4.8	4.8	4.2	10.5	8.3	9.4	5.7	10.8	2.6	2.9	2.7	7.4	8.3	8.1	5.5	8.4	1	1	1	1	1	1	1	1	2.39728	High	6.61318	0.0006213	0.002815	29.5	6.61318
[K].EISDDTNDNNNNNNNNKSDDELNYKK.[L]	1xPhospho [Y24]; 3xTMT6plex [K17; K25; K26]; 1xAcetyl [N-Term]; 5xDeamidated [N12; N13; N14; N15; N16]	PBANKA_112680 1xPhospho [Y4430]; 1xAcetyl [N-Term]	1	1	PBANKA_112680	HECT-domain (ubiquitin-transferase), putative	PBANKA_112680 [4407-4432]	2	3855.68		49.5	145.5	96.3	103.4	110.7	112.3	89.8	92.4	5.9	17.2	11.4	12.2	13.1	13.3	10.6	10.9	3.2	10.5	7.4	8.6	13.1	11.5	10.3	8.5	1	1	1	1	1	1	1	1						24.6	-2.04214
[K].KVQSNVNLNDDNNEK.[N]	3xTMT6plex [N-Term; K1; K15]; 1xPhospho [S4(100)]	PBANKA_080680 1xPhospho [S577(100)]	1	2	PBANKA_080680	conserved Plasmodium protein, unknown function	PBANKA_080680 [574-588]	1	2498.29	S4(Phospho): 100	84.6	141.6	89.5	154.1	86.5	73.2	73.9	96.6	47.1	78.7	49.8	85.7	48.1	40.7	41.1	53.7	25.7	48	32.3	60.2	48.1	35.2	39.8	41.7	1	1	1	1	1	1	1	1	3.53188	High	0.215109	0	0.0001153	35.14	0.215109
[R].TNLLGEQTENNNVIENDKQSYSNSR.[K]	2xTMT6plex [N-Term; K18]; 1xDeamidated [N/Q]; 2xPhospho [S22(80.3); S/Y/T]	PBANKA_093720.2 2xPhospho [S967(80.3); S/Y/T]	2	4	PBANKA_093720.2	asparagine-rich antigen, putative	PBANKA_093720.2 [946-970]	1	3486.58	S20(Phospho): 55.28; Y21(Phospho): 55.28; S22(Phospho): 80.3	59.8	72.7	50.3	112.9	141.1	140.3	83.1	139.7	5.1	6.2	4.3	9.7	12.1	12	7.1	12	2.8	3.8	2.8	6.8	12.1	10.4	6.9	9.3	1	1	1	1	1	1	1	1	2.94263	High	7.82084	0.009837	0.08863	41.3	7.82084
[K].NSNLYPDHHNQNR.[Y]	1xTMT6plex [N-Term]; 1xPhospho [S2(99.7)]	PBANKA_081060 1xPhospho [S1062(99.7)]	1	2	PBANKA_081060	exoribonuclease, putative	PBANKA_081060 [1061-1073]	0	1917.86	S2(Phospho): 99.71	51.1	81.3	83.5	147.8	117.8	125.4	115.2	77.8	3.3	5.2	5.4	9.5	7.6	8.1	7.4	5	1.8	3.2	3.5	6.7	7.6	7	7.2	3.9	1	1	1	1	1	1	1	1	1.72048	High	0.471383	0.002979	0.02543	17.08	0.471383
[K].MNSNAYEENDSFVGEHNNK.[N]	2xTMT6plex [N-Term; K19]; 1xOxidation [M1]; 2xPhospho [S3(100); Y/S]	PBANKA_060560 2xPhospho [S1878(100); Y/S]	1	7	PBANKA_060560	conserved Plasmodium protein, unknown function	PBANKA_060560 [1876-1894]	0	2833.16	S3(Phospho): 100; Y6(Phospho): 50; S11(Phospho): 50	90.3	178.2	97.3	138.5	66.9	81	73.7	74.1	65.9	130.1	71	101.1	48.8	59.1	53.8	54.1	36	79.3	46.1	71	48.8	51.1	52.1	42	3	3	3	3	3	3	3	3	3.45428	High	0.454423	0.0002967	0.001278	30.14	1.21318
[R].NGQNANDGVQLGSSGQGNVQNQR.[S]	1xTMT6plex [N-Term]		1	2	PBANKA_134910	merozoite surface protein 7 (MSP7)	PBANKA_134910 [164-186]	0	2571.25		52.5	120.2	96	129.6	94.4	106.2	116.6	84.6	6.2	14.3	11.4	15.4	11.2	12.6	13.8	10	3.4	8.7	7.4	10.8	11.2	10.9	13.4	7.8	1	1	1	1	1	1	1	1	3.81797	High	1.55454	0	3.636e-07	67.88	1.55454
[K].IEQSDENTLDTTEYGK.[L]	2xTMT6plex [N-Term; K16]; 1xDeamidated [N7]; 2xPhospho [S4(100); T/Y]	PBANKA_090110 2xPhospho [S628(100); T632(95.6)]	1	2	PBANKA_090110	serine/threonine protein kinase, putative	PBANKA_090110 [625-640]	0	2462.07	S4(Phospho): 99.97; T8(Phospho): 95.65	37.2	104.9	101.6	130.1	110.7	109.2	106.9	99.3	3.7	10.3	10	12.8	10.9	10.8	10.5	9.8	2	6.3	6.5	9	10.9	9.3	10.2	7.6	1	1	1	1	1	1	1	1	1.55224	High	8.70211	0.003857	0.03202	42.75	8.70211
[K].GNDNVETDQDIQNNK.[Y]	2xTMT6plex [N-Term; K15]; 1xPhospho [T7(100)]	PBANKA_113090 1xPhospho [T636(100)]	1	2	PBANKA_113090	methyltransferase, putative	PBANKA_113090 [630-644]	0	2242.04	T7(Phospho): 100	73.4	113.5	103.6	184.5	85.7	75.9	87	76.4	26.7	41.3	37.7	67.2	31.2	27.6	31.7	27.8	14.6	25.2	24.5	47.2	31.2	23.9	30.7	21.6	1	1	1	1	1	1	1	1	3.87398	High	2.04535	0	7.868e-05	40.26	2.04535
[K].TENDKENTSEYDDNEFVINK.[K]	3xTMT6plex [N-Term; K5; K20]; 1xDeamidated [N7]; 1xPhospho [T/S/Y]	PBANKA_144250 1xPhospho [S/T]	1	2	PBANKA_144250	histone acetyltransferase, putative	PBANKA_144250 [279-298]	1	3172.48	T8(Phospho): 45.11; S9(Phospho): 45.11	76.6	127.1	64.4	110.3	107	94.7	115.1	104.8	13.7	22.8	11.6	19.8	19.2	17	20.7	18.8	7.5	13.9	7.5	13.9	19.2	14.7	20	14.6	1	1	1	1	1	1	1	1	1.58956	Medium	5.38453	0.02603	0.2595	21.53	5.38453
[K].SIDNAPK.[I]	2xTMT6plex [N-Term; K7]; 1xPhospho [S1]	PBANKA_021060 1xPhospho [S2226(100)]	1	1	PBANKA_021060	ubiquitin carboxyl-terminal hydrolase, putative	PBANKA_021060 [2226-2232]	0	1282.68		101.1	173.6	113.9	188.4	59.4	58.1	56.8	48.6	84.1	144.4	94.7	156.6	49.4	48.3	47.2	40.4	45.9	88	61.5	110	49.4	41.8	45.7	31.4	1	1	1	1	1	1	1	1	2.88774	High	0.281062	0.0009311	0.007551	16.57	0.281062
[R].NDEEYKSERSVDTEENK.[N]	3xTMT6plex [N-Term; K6; K17]; 3xPhospho [S7(81.9); S10(98.9); T13(99.9)]	PBANKA_091750 3xPhospho [S21(81.9); S24(98.9); T27(99.9)]	1	2	PBANKA_091750	structural maintenance of chromosome protein, putative	PBANKA_091750 [15-31]	2	2999.29	S7(Phospho): 81.94; S10(Phospho): 98.9; T13(Phospho): 99.91	72.8	104.9	84.6	160	109.4	108.8	97.1	62.3	34.6	49.9	40.2	76	52	51.7	46.2	29.6	18.9	30.4	26.1	53.4	52	44.7	44.7	23	1	1	1	1	1	1	1	1	2.08759	High	3.46964	0.002434	0.02032	10.56	3.46964
[K].NDEDGHSLSKIIEPFDDEENNNTLDPNK.[T]	3xTMT6plex [N-Term; K10; K28]; 1xPhospho [S/T]		1	2	PBANKA_110800	transcription factor IIb, putative	PBANKA_110800 [319-346]	1	3966.88	S7(Phospho): 50; S9(Phospho): 50	55.6	124.5	84.7	112.1	98.7	79	153.8	91.6	5.9	13.1	8.9	11.8	10.4	8.3	16.2	9.7	3.2	8	5.8	8.3	10.4	7.2	15.7	7.5	1	1	1	1	1	1	1	1	2.35065	High	-6.89737	0.003664	0.02943	16.96	-6.89737
[K].FNEQNSMNDYK.[S]	2xTMT6plex [N-Term; K11]; 1xOxidation [M7]; 1xPhospho [S6(100)]	PBANKA_060550 1xPhospho [S573(100)]	1	4	PBANKA_060550	conserved Plasmodium protein, unknown function	PBANKA_060550 [568-578]	0	1943.86	S6(Phospho): 99.99	100	155.7	95.3	172.6	68.7	68.5	72.1	67.1	88.3	137.5	84.1	152.4	60.6	60.5	63.6	59.2	48.2	83.8	54.6	107	60.6	52.3	61.6	46	2	2	2	2	2	2	2	2	2.35818	High	1.28326	0.0006943	0.003768	39.42	1.28326
[R].EAEKELEQAAAVAIDEEDIEN.[-]	2xTMT6plex [N-Term; K4]		1	2	PBANKA_093030	GTP-binding nuclear protein RAN/TC4, putative	PBANKA_093030 [194-214]	1	2774.4		74.2	132.9	83.9		139.6	127.6	90.8	151	5.3	9.5	6		10	9.1	6.5	10.8	2.9	5.8	3.9		10	7.9	6.3	8.4	1	1	1		1	1	1	1	3.29437	High	5.83927	0.0005205	0.002566	29.74	5.83927
[K].NNGGQNNASQNNGDQNEGDK.[N]	2xTMT6plex [N-Term; K20]; 2xDeamidated [N/Q]		1	11	PBANKA_041680	ubiquitin specific protease, putative	PBANKA_041680 [679-698]	0	2535.13		55.9	117.1	88.8	125.5	110.1	112.9	97.2	92.5	13	27.2	20.6	29.2	25.6	26.2	22.6	21.5	7.1	16.6	13.4	20.5	25.6	22.7	21.9	16.7	3	3	3	3	3	3	3	3	3.93083	High	10.5343	0	1.576e-06	56.96	10.5343
[K].MNEANNTEKNQQTNNEAK.[I]	3xTMT6plex [N-Term; K9; K18]; 1xPhospho [T]; 1xOxidation [M1]		1	7	PBANKA_040110	serine/threonine protein kinase, putative (SRPK1)	PBANKA_040110 [329-346]	1	2861.37		52.2	124.1	87.1	109.6	112.6	95.2	126.9	92.3	11.7	27.9	19.6	24.6	25.3	21.4	28.5	20.7	6.4	17	12.7	17.3	25.3	18.5	27.6	16.1	2	2	2	2	2	2	2	2	1.76086	High	0.556603	0.0009756	0.007812	27.97	3.54291
[K].SHNSISTNLNNNENTNELSK.[N]	2xTMT6plex [N-Term; K20]; 1xPhospho [S1(81.5)]	PBANKA_110850 1xPhospho [S30(81.5)]	1	1	PBANKA_110850	conserved Plasmodium protein, unknown function	PBANKA_110850 [30-49]	0	2768.33		46.2	106.8	97.2	133.4	88.4	109.9	124.9	93.2	7	16.1	14.6	20.1	13.3	16.5	18.8	14	3.8	9.8	9.5	14.1	13.3	14.3	18.2	10.9	1	1	1	1	1	1	1	1	1.63839	High	3.56403	0.005964	0.05408	16.73	3.56403
[K].KNSDNLNTPYTDISYNTNDQK.[K]	3xTMT6plex [N-Term; K1; K21]; 1xPhospho [S3(100)]; 1xDeamidated [N]	PBANKA_102730 1xPhospho [S649(100)]	1	3	PBANKA_102730	conserved Plasmodium protein, unknown function	PBANKA_102730 [647-667]	1	3213.56		76	143.2	98.5	149.6	94.7	83.5	72.8	81.8	17.6	33.1	22.8	34.6	21.9	19.3	16.8	18.9	9.6	20.2	14.8	24.3	21.9	16.7	16.3	14.7	1	1	1	1	1	1	1	1	3.67144	High	2.14067	0	7.95e-05	61.31	2.14067
[K].EGELTDKDENEIDENGNIEEGK.[D]	3xTMT6plex [N-Term; K7; K22]; 1xPhospho [T5(100)]; 1xDeamidated [N]	PBANKA_082290 1xPhospho [T286(100)]	1	12	PBANKA_082290	conserved Plasmodium protein, unknown function	PBANKA_082290 [282-303]	1	3245.52		90.9	116.4	80.2	170.4	94.6	96.2	105.6	45.8	60.1	76.9	53	112.6	62.5	63.6	69.8	30.3	32.8	46.9	34.4	79.1	62.5	55	67.6	23.5	3	3	3	3	3	3	3	3	4.58697	High	0.529049	0.0006213	0.002894	46.46	0.529049
[K].YNDNNSISSNNNINNNLSSSR.[S]	1xTMT6plex [N-Term]; 2xPhospho [S6(99.1); S8(83.1)]	PBANKA_143470 2xPhospho [S873(99.1); S875(83.1)]	1	2	PBANKA_143470	clathrin heavy chain, putative	PBANKA_143470 [868-888]	0	2730.14	S6(Phospho): 99.12; S8(Phospho): 83.06	50.8	70.7	84.2	154.6	108.6	98	112.1	121	6.6	9.2	10.9	20.1	14.1	12.7	14.6	15.7	3.6	5.6	7.1	14.1	14.1	11	14.1	12.2	1	1	1	1	1	1	1	1	3.95123	High	0.449396	0	7.381e-07	63.5	0.449396
[K].TLNSSTPK.[S]	2xTMT6plex [N-Term; K8]; 1xPhospho [S/T]		2	5	PBANKA_101740	selenoprotein, putative (Sel4)	PBANKA_101740 [93-100]	0	1385.74	S4(Phospho): 33.33; S5(Phospho): 33.33; T6(Phospho): 33.33	67.1	73.2	47.6	120.6	121.3	135	85.1	150.3	5.9	6.4	4.2	10.5	10.6	11.8	7.4	13.1	3.2	3.9	2.7	7.4	10.6	10.2	7.2	10.2	1	1	1	1	1	1	1	1	1.35193	High	0.467436	0.003629	0.02894	16.65	0.467436
[K].NEINDYNDSNVEFK.[E]	2xTMT6plex [N-Term; K14]; 1xPhospho [Y/S]		1	2	PBANKA_090920	conserved Plasmodium protein, unknown function	PBANKA_090920 [1541-1554]	0	2239.03	Y6(Phospho): 50; S9(Phospho): 50	65.6	116	94.8	151.7	113	121.1	102.4	35.5	7.1	12.6	10.3	16.5	12.3	13.2	11.2	3.9	3.9	7.7	6.7	11.6	12.3	11.4	10.8	3	1	1	1	1	1	1	1	1	1.10823	High	4.14383	0.009508	0.0834
[K].INISSNTSSSSNDSDDNEIQSTQIVSFSEK.[Y]	2xTMT6plex [N-Term; K30]; 1xPhospho [S/T]		1	2	PBANKA_133310	conserved Plasmodium protein, unknown function	PBANKA_133310 [361-390]	0	3771.75	S4(Phospho): 23.73; S5(Phospho): 23.73; S9(Phospho): 23.73	51.7	124.7	98.2	125.8	92.7	93	123.4	90.5	7.1	17.2	13.6	17.4	12.8	12.8	17	12.5	3.9	10.5	8.8	12.2	12.8	11.1	16.5	9.7	1	1	1	1	1	1	1	1	2.25373	High	-0.598439	0.00144	0.01096
[K].GNNSFIHSEK.[L]	2xTMT6plex [N-Term; K10]; 1xPhospho [S4(100)]	PBANKA_010170 1xPhospho [S383(100)]	1	2	PBANKA_010170	conserved Plasmodium protein, unknown function	PBANKA_010170 [380-389]	0	1670.83		84.9	148.7	97.2	155.7	74.3	86.6	74.7	77.9	70.9	124.2	81.2	130	62	72.3	62.4	65	38.7	75.7	52.7	91.3	62	62.5	60.4	50.5	1	1	1	1	1	1	1	1	2.27888	High	1.02247	0.002364	0.01869	9.52	1.02247
[R].IGINDDNNSISSK.[K]	2xTMT6plex [N-Term; K13]; 2xPhospho [S]	PBANKA_010480 2xPhospho [S778(99.5); S]	1	4	PBANKA_010480	conserved Plasmodium protein, unknown function	PBANKA_010480 [767-779]	0	1994.92		49.2	71.6	65.5	121.1	162.3	107.4	124.8	98	4.4	6.4	5.9	10.8	14.5	9.6	11.2	8.8	2.4	3.9	3.8	7.6	14.5	8.3	10.8	6.8	1	1	1	1	1	1	1	1	2.07828	High	0.949142	5.957e-05	0.0004152	55.53	0.949142
[K].THNESEIESFNEEMAMEIEK.[K]	2xTMT6plex [N-Term; K20]; 2xOxidation [M14; M16]; 1xPhospho [S5(99.6)]	PBANKA_122810 1xPhospho [S456(99.6)]	1	2	PBANKA_122810	transcription factor with AP2 domain(s), putative (ApiAP2)	PBANKA_122810 [452-471]	0	2967.3	S5(Phospho): 99.6	53.3	115	109.6	156.6	120.8	102.2	114.7	27.8	4.9	10.7	10.2	14.5	11.2	9.5	10.6	2.6	2.7	6.5	6.6	10.2	11.2	8.2	10.3	2	1	1	1	1	1	1	1	1	1.65055	High	0.988897	0.00148	0.01134	34.33	0.988897
[K].HNNSNVDGNNIYHNEGTNK.[K]	2xTMT6plex [N-Term; K19]		1	4	PBANKA_143240	perforin-like protein 2 (PLP2)	PBANKA_143240 [218-236]	0	2599.26		47.9	117.3	100.3	129.9	107.3	105	103.2	89.1	10.4	25.6	21.9	28.3	23.4	22.9	22.5	19.4	5.7	15.6	14.2	19.9	23.4	19.8	21.8	15.1	2	2	2	2	2	2	2	2	2.85471	High	1.62578	3.638e-05	0.0001357	25.8	1.62578
[K].EIDSNNNDDDIEIFNELANEEK.[E]	2xTMT6plex [N-Term; K22]; 1xPhospho [S4(100)]	PBANKA_093960 1xPhospho [S2100(100)]	1	5	PBANKA_093960	polyadenylate-binding protein-interacting protein 1, putative (PAIP1)	PBANKA_093960 [2097-2118]	0	3118.41	S4(Phospho): 100	85.4	61.9	68.4	192.9	80	87.3	146.8	77.2	3.8	2.8	3.1	8.7	3.6	3.9	6.6	3.5	2.1	1.7	2	6.1	3.6	3.4	6.4	2.7	1	1	1	1	1	1	1	1	2.98193	High	1.55714	3.638e-05	0.0001441	42.12	1.55714
[R].GNADDNDNTTEQADNQNSNDK.[K]	2xTMT6plex [N-Term; K21]; 1xPhospho [T]	PBANKA_031230 1xPhospho [T]	1	2	PBANKA_031230	conserved Plasmodium protein, unknown function	PBANKA_031230 [46-66]	0	2818.18		65.7	108.5	58.7	99	133.4	115.4	106.5	112.6	5.9	9.7	5.2	8.8	11.9	10.3	9.5	10	3.2	5.9	3.4	6.2	11.9	8.9	9.2	7.8	1	1	1	1	1	1	1	1						16.85	2.15579
[K].SEDSTEEKSDEEEEDEEEEEEEEEDDDPEK.[L]	3xTMT6plex [N-Term; K8; K30]; 2xPhospho [S/T]	PBANKA_124230 2xPhospho [S62(86.6); S/T]	1	8	PBANKA_124230	Hsc70-interacting protein,58 kDa phosphoprotein (HIP)	PBANKA_124230 [54-83]	1	4465.71	S4(Phospho): 59.6; S9(Phospho): 86.58	92.7	96.5	86	200.7	87.4	93.1	96.3	47.4	28.2	29.4	26.2	61.1	26.6	28.3	29.3	14.4	15.4	17.9	17	42.9	26.6	24.5	28.4	11.2	1	1	1	1	1	1	1	1	5.52082	High	0.345307	0	2.553e-06	30	0.345307
[R].NSYNDDNSNMMGQDEFEEKYSDDDDGELKK.[Y]	4xTMT6plex [N-Term; K19; K29; K30]; 2xPhospho [S8; S21]; 2xDeamidated [N9; Q/N]; 2xOxidation [M10; M11]	PBANKA_050540 2xPhospho [S99; S112]	1	2	PBANKA_050540	conserved Plasmodium protein, unknown function	PBANKA_050540 [92-121]	2	4642.93		47.6	112.4	78.9	97.6	117.6	131.8	122.2	92	6.6	15.6	10.9	13.5	16.3	18.3	16.9	12.7	3.6	9.5	7.1	9.5	16.3	15.8	16.4	9.9	1	1	1	1	1	1	1	1						23.29	8.17642
[K].YNVLNVSDDEF.[-]	1xTMT6plex [N-Term]; 1xPhospho [S7(100)]	PBANKA_135120 1xPhospho [S542(100)]	1	2	PBANKA_135120	conserved Plasmodium protein, unknown function	PBANKA_135120 [536-546]	0	1623.71	S7(Phospho): 99.99	51.8	121.3	70.4	80.5	76.1	153.5	148.3	98	2.4	5.6	3.2	3.7	3.5	7.1	6.8	4.5	1.3	3.4	2.1	2.6	3.5	6.1	6.6	3.5	1	1	1	1	1	1	1	1	2.3047	High	-0.41499	0.004831	0.04075	23.64	-0.41499
[K].ENYLLNHFNSR.[N]	1xTMT6plex [N-Term]; 1xPhospho [Y/S]	PBANKA_080150 1xPhospho [S720(100)]	1	4	PBANKA_080150	conserved Plasmodium protein, unknown function	PBANKA_080150 [711-721]	0	1715.81		118.7	197	111.5	184.5	47.6	47	48.8	44.9	165	273.8	154.9	256.4	66.2	65.3	67.8	62.4	90.1	166.9	100.6	180.1	66.2	56.5	65.7	48.5	2	2	2	2	2	2	2	2	3.75419	High	-0.0728043	0.0008012	0.004805	45.28	-0.0728043
[K].LELNPEGNAENNQTNENQDTNNEESEIK.[Y]	2xTMT6plex [N-Term; K28]; 1xPhospho [T/S]		1	16	PBANKA_111860	cell division cycle protein 48 homologue, putative	PBANKA_111860 [715-742]	0	3725.68		58.4	89	85.9	150.6	128.2	111.9	109	67	23.3	35.4	34.2	59.9	51	44.5	43.4	26.7	12.7	21.6	22.2	42.1	51	38.5	42	20.7	4	5	5	5	5	5	5	5	3.56846	High	1.95349	0	2.597e-06	49.44	1.95349
[K].INDSEDEGDEDLENIMSTILK.[L]	2xTMT6plex [N-Term; K21]; 1xOxidation [M16]; 1xPhospho [S4(100)]	PBANKA_143430 1xPhospho [S502(100)]	1	4	PBANKA_143430	conserved Plasmodium protein, unknown function	PBANKA_143430 [499-519]	0	2934.36	S4(Phospho): 100	77.1	79.9	64.9	155.2	158.5	100.2	110	54.2	9.3	9.7	7.9	18.8	19.2	12.1	13.3	6.6	5.1	5.9	5.1	13.2	19.2	10.5	12.9	5.1	2	2	2	2	2	2	2	2	2.98878	High	-2.79834	0.0003171	0.001386	36.67	-2.79834
[K].NDAEENESNEQNEANK.[F]	2xTMT6plex [N-Term; K16]; 1xPhospho [S8(100)]	PBANKA_081090 1xPhospho [S118(100)]	1	2	PBANKA_081090	FHA domain protein, putative	PBANKA_081090 [111-126]	0	2373.02	S8(Phospho): 100	39.7	112.5	106.7	129.6	103.6	121.4	102.6	83.8	5.7	16.1	15.2	18.5	14.8	17.3	14.7	12	3.1	9.8	9.9	13	14.8	15	14.2	9.3	1	1	1	1	1	1	1	1	2.9468	High	2.44754	0	1.647e-05	37.66	2.44754
[K].NDDDHYNLEISSIDLTK.[C]	2xTMT6plex [N-Term; K17]; 1xPhospho [S/T/Y]	PBANKA_103430 1xPhospho [S1055(88.6)]	1	2	PBANKA_103430	transcription factor with AP2 domain(s) (AP2-G2)	PBANKA_103430 [1044-1060]	0	2530.21		42.2	79.2	113.3	177.7	101	92.8	122	71.7	5.7	10.7	15.2	23.9	13.6	12.5	16.4	9.7	3.1	6.5	9.9	16.8	13.6	10.8	15.9	7.5	1	1	1	1	1	1	1	1	3.07728	High	0.269298	3.638e-05	0.0001645	41.71	0.269298
[K].ISSNNNLNIYHDK.[L]	2xTMT6plex [N-Term; K13]; 1xPhospho [S/Y]	PBANKA_112350 1xPhospho [S2211(92.6)]	1	4	PBANKA_112350	SNF2 helicase, putative (ISWI)	PBANKA_112350 [2209-2221]	0	2070.04	S3(Phospho): 92.55	112	187.3	118	193.1	52.7	47.4	45.3	44.3	35.5	59.4	37.4	61.2	16.7	15	14.4	14	19.4	36.2	24.3	43	16.7	13	13.9	10.9	1	1	1	1	1	1	1	1	3.49166	High	0.681976	5.957e-05	0.0003066	29.07	0.681976
[K].GKENPENGQNSDSTGDSSLGSTGSNGSQPAPTTPK.[E]	3xTMT6plex [N-Term; K2; K35]; 1xPhospho [S17(75.4)]; 2xDeamidated [Q/N]		1	30	PBANKA_030490	serine repeat antigen 3 (SERA3)	PBANKA_030490 [68-102]	1	4172.93		68.3	81.6	72.4	149.5	106.4	57.5	111.3	153	4.9	5.9	5.2	10.8	7.7	4.2	8.1	11.1	2.7	3.6	3.4	7.6	7.7	3.6	7.8	8.6	1	1	1	1	1	1	1	1	3.81123	High	-1.26483	0	9.519e-05	64.45	-1.77353
[K].NSSGYDIQQIK.[E]	2xTMT6plex [N-Term; K11]; 1xPhospho [S2(91)]; 1xDeamidated [N1]	PBANKA_031620 1xPhospho [S154(78)]	1	4	PBANKA_031620	Plasmodium exported protein, unknown function	PBANKA_031620 [152-162]	0	1791.89		39.4	134.8	110	111.6	103.7	107.4	101.2	92	6.2	21.3	17.4	17.7	16.4	17	16	14.5	3.4	13	11.3	12.4	16.4	14.7	15.5	11.3	1	1	1	1	1	1	1	1	2.80433	High	-2.98498	0.001171	0.008662	27.61	-2.88279
[K].QNSTPNSEIDDYINDK.[C]	2xTMT6plex [N-Term; K16]; 2xDeamidated [N6; N14]; 2xPhospho [S3(96.4); S/T/Y]	PBANKA_040840 2xPhospho [S439(83.4); S/T/Y]	1	2	PBANKA_040840	phosphoglycerate mutase, putative	PBANKA_040840 [437-452]	0	2473.05	S3(Phospho): 83.4; S7(Phospho): 71.69	99	119.9	43.4	116	108.9	91.6	149.4	71.6	13	15.7	5.7	15.2	14.3	12	19.6	9.4	7.1	9.6	3.7	10.7	14.3	10.4	19	7.3	1	1	1	1	1	1	1	1	1.59387	High	4.28187	0.003423	0.02787	26.9	4.28187
[K].NYLNNSTNK.[D]	2xTMT6plex [N-Term; K9]; 1xPhospho [S6(92.8)]	PBANKA_143140 1xPhospho [S86(92.8)]	1	2	PBANKA_143140	conserved Plasmodium protein, unknown function	PBANKA_143140 [81-89]	0	1605.8	S6(Phospho): 92.79	114.2	127.6	90.6	210.9	62.8	62.9	80.3	50.7	22.9	25.6	18.2	42.3	12.6	12.6	16.1	10.2	12.5	15.6	11.8	29.7	12.6	10.9	15.6	7.9	1	1	1	1	1	1	1	1	2.60747	High	-0.115158	0.000577	0.002634	23.68	-0.115158
[K].SEELYDEDDSILK.[D]	2xTMT6plex [N-Term; K13]; 1xPhospho [S10(100)]	PBANKA_091020 1xPhospho [S221(100)]	1	2	PBANKA_091020	protein phosphatase 2C, putative	PBANKA_091020 [212-224]	0	2093.99	S10(Phospho): 100	47.9	124.4	100.1	119.8	100.1	101.7	133	73	7.5	19.5	15.7	18.8	15.7	16	20.9	11.5	4.1	11.9	10.2	13.2	15.7	13.8	20.2	8.9	1	1	1	1	1	1	1	1	2.95763	High	0.793729	5.957e-05	0.0001925	34.36	0.793729
[K].MYSLESINNEIDQLNIINK.[S]	2xTMT6plex [N-Term; K19]; 2xPhospho [Y/S]; 1xOxidation [M1]	PBANKA_102960 2xPhospho [S276(86.4); S279(99.9)]	1	3	PBANKA_102960	conserved Plasmodium protein, unknown function	PBANKA_102960 [274-292]	0	2885.38		148	224.4	68.9	132.8	37.3	50.3	82.2	56	11.9	18	5.5	10.7	3	4	6.6	4.5	6.5	11	3.6	7.5	3	3.5	6.4	3.5	1	1	1	1	1	1	1	1	3.56939	High	-3.49756	5.957e-05	0.0002091	39.81	-3.49756
[K].GSYTNEEDNAPASEPYTDEDK.[N]	2xTMT6plex [N-Term; K21]; 1xPhospho [Y/T/S]		1	2	PBANKA_041600	high molecular weight rhoptry protein 3, putative (RhopH3)	PBANKA_041600 [885-905]	0	2870.23		88.5	97.4	78.3	177.3	102	101	92	63.6	24.7	27.2	21.9	49.6	28.5	28.2	25.7	17.8	13.5	16.6	14.2	34.8	28.5	24.4	24.9	13.8	1	1	1	1	1	1	1	1	4.61995	High	-4.23205	0	5.725e-08	53.23	-4.23205
[K].NSGTIIYNENK.[E]	2xTMT6plex [N-Term; K11]; 1xPhospho [S2(89.4)]	PBANKA_031160 1xPhospho [S242(89.4)]	1	3	PBANKA_031160	conserved Plasmodium protein, unknown function	PBANKA_031160 [241-251]	0	1790.91	S2(Phospho): 89.41	79.3	153.2	121.4	177.3	56.4	90	64.8	57.6	16.3	31.5	25	36.5	11.6	18.5	13.3	11.8	8.9	19.2	16.2	25.6	11.6	16	12.9	9.2	1	1	1	1	1	1	1	1	2.40055	High	-0.42655	0.00224	0.01753	21.54	-0.42655
[R].NDERSDYGHPNK.[R]	2xTMT6plex [N-Term; K12]; 1xPhospho [S/Y]		1	1	PBANKA_131440	conserved Plasmodium protein, unknown function	PBANKA_131440 [502-513]	1	1969.92	S5(Phospho): 50; Y7(Phospho): 50	89.1	134	71.3	129.8	88.8	90.7	121.5	74.8	18.9	28.4	15.1	27.5	18.8	19.2	25.7	15.8	10.3	17.3	9.8	19.3	18.8	16.6	24.9	12.3	1	1	1	1	1	1	1	1	2.30699	High	-0.33481	0.004714	0.0397	12.03	0.539557
[K].YTLFDNSNSDENVNNEDSTIEK.[G]	2xTMT6plex [N-Term; K22]; 2xDeamidated [N]; 1xPhospho [S/Y/T]		1	4	PBANKA_100850	translocon component PTEX150 (PTEX150)	PBANKA_100850 [294-315]	0	3088.36	S7(Phospho): 49.94; S9(Phospho): 49.94	80.4	63.4	62.2	170.1	138.8	168.6	50.8	65.6	4.6	3.6	3.5	9.7	7.9	9.6	2.9	3.7	2.5	2.2	2.3	6.8	7.9	8.3	2.8	2.9	1	1	1	1	1	1	1	1	2.2578	High	17.0915	0.005658	0.04961	34.56	17.0915
[K].HTNSNNNLVNNK.[N]	2xTMT6plex [N-Term; K12]; 1xPhospho [T/S]	PBANKA_133750 1xPhospho [S1425(98.7)]	1	7	PBANKA_133750	conserved Plasmodium protein, unknown function	PBANKA_133750 [1422-1433]	0	1906.95		125.2	193.9	108.9	190.4	47.4	44.2	43.8	46.2	414.1	641.2	360	629.5	156.9	146.2	144.8	152.7	226.1	390.9	233.7	442.1	156.9	126.4	140.2	118.6	4	4	4	4	4	4	4	4	5.93567	High	0.409544	0	3.484e-06	40.59	-0.0135938
[K].FPNQDDINDLIQHDEEEDGNEEYSDEGNETEGQGK.[E]	2xTMT6plex [N-Term; K35]; 1xPhospho [Y/T/S]; 1xDeamidated [Q/N]		1	12	PBANKA_101580	conserved Plasmodium protein, unknown function	PBANKA_101580 [121-155]	0	4548.9		64.3	100.8	59.7	103.1	117.1	88	117.1	149.8	8.8	13.8	8.2	14.1	16	12	16	20.5	4.8	8.4	5.3	9.9	16	10.4	15.5	15.9	2	2	2	2	2	2	2	2	2.69703	High	3.65287	8.7e-05	0.000426	35.14	4.83361
[-].MTEEEMIVETGSNTESEFDEQAELLEK.[K]	2xTMT6plex [N-Term; K27]; 1xAcetyl [N-Term]; 1xDeamidated [Q/N]; 1xPhospho [T/S]	PBANKA_060430 1xAcetyl [N-Term]	1	10	PBANKA_060430	conserved Plasmodium protein, unknown function	PBANKA_060430 [1-27]	0	3699.65	T2(Phospho): 53.27	56.9	122.3	70.2	85.5	130.5	62.3	171.1	101.3	2.7	5.9	3.4	4.1	6.3	3	8.3	4.9	1.5	3.6	2.2	2.9	6.3	2.6	8	3.8	1	1	1	1	1	1	1	1	1.42551	High	17.7305	0.004123	0.03425
[R].REENYNNDNENNNEK.[E]	2xTMT6plex [N-Term; K15]; 2xDeamidated [N6; N7]		1	1	PBANKA_100340	lysine decarboxylase, putative (UIS14)	PBANKA_100340 [1989-2003]	1	2356.07		77.2	67.1	53.5	146.5	127.7	124.7	139.5	63.8	6.2	5.4	4.3	11.8	10.3	10.1	11.3	5.2	3.4	3.3	2.8	8.3	10.3	8.7	10.9	4	1	1	1	1	1	1	1	1	1.45094	High	7.61473	0.00906	0.07868	28.16	7.61473
[R].SGNETNKSEESPNK.[N]	3xTMT6plex [N-Term; K7; K14]; 1xPhospho [T/S]	PBANKA_111520 1xPhospho [S628(99.8)]	1	2	PBANKA_111520	conserved Plasmodium protein, unknown function	PBANKA_111520 [621-634]	1	2288.14		65.8	107.4	96	157.5	90.2	100.7	114.8	67.5	35.9	58.6	52.4	85.9	49.2	54.9	62.6	36.8	19.6	35.7	34	60.3	49.2	47.5	60.6	28.6	1	1	1	1	1	1	1	1	2.90692	High	1.45159	5.957e-05	0.0003785	32.61	1.45159
[K].EQESFNLK.[Q]	2xTMT6plex [N-Term; K8]; 1xPhospho [S4(100)]	PBANKA_010270 1xPhospho [S345(100)]	1	1	PBANKA_010270	conserved Plasmodium protein, unknown function	PBANKA_010270 [342-349]	0	1532.78	S4(Phospho): 100	103.1	149.1	87.4	162.5	90.4	60.3	81.2	66	45.2	65.5	38.4	71.3	39.7	26.5	35.6	29	24.7	39.9	24.9	50.1	39.7	22.9	34.5	22.5	1	1	1	1	1	1	1	1	1.94442	High	1.5761	0.009163	0.08027
[K].YMSSSSTILNNKR.[N]	2xTMT6plex [N-Term; K12]; 2xPhospho [Y/S/T]; 1xOxidation [M2]		1	1	PBANKA_103370	conserved Plasmodium protein, unknown function	PBANKA_103370 [4-16]	1	2135		121.2	231.2	114.2	153.7	41	43.2	41.2	54.2	78.9	150.6	74.4	100.1	26.7	28.1	26.8	35.3	43.1	91.8	48.3	70.3	26.7	24.3	26	27.4	1	1	1	1	1	1	1	1	2.27659	High	2.40419	0.007722	0.06566	11.53	2.40419
[K].NNNSISNSFNTNNDIDNK.[Y]	2xTMT6plex [N-Term; K18]; 1xPhospho [S4(99.5)]	PBANKA_081130 1xPhospho [S431(99.5)]	1	2	PBANKA_081130	Ran-binding protein, putative	PBANKA_081130 [428-445]	0	2563.18	S4(Phospho): 99.52	99.5	139.2	77.8	150.7	78.2	93.7	74.8	85.9	20.9	29.2	16.3	31.6	16.4	19.7	15.7	18	11.4	17.8	10.6	22.2	16.4	17	15.2	14	1	1	1	1	1	1	1	1	2.21992	High	-0.555128	0.0009756	0.007982	30.52	-0.555128
[R].TNSNQLYDLPTQGPNINVQR.[T]	1xTMT6plex [N-Term]; 1xPhospho [T/Y/S]; 1xDeamidated [Q/N]	PBANKA_031190 1xPhospho [S36(98.5)]	1	5	PBANKA_031190	RING zinc finger protein, putative	PBANKA_031190 [34-53]	0	2582.24		111.9	124.3	40.2	123	93.7	110.2	91.7	104.9	13.7	15.3	4.9	15.1	11.5	13.5	11.3	12.9	7.5	9.3	3.2	10.6	11.5	11.7	10.9	10	1	1	1	1	1	1	1	1	3.8752	High	3.37248	3.638e-05	0.0001746	46.95	3.37248
[K].NGNTYDNNNNNAENADNNATK.[N]	2xTMT6plex [N-Term; K21]; 4xDeamidated [N]		1	2	PBANKA_051990	conserved Plasmodium protein, unknown function	PBANKA_051990 [569-589]	0	2744.19		64.8	72.1	46.2	108.3	114.7	137.5	146.1	110.4	6	6.7	4.3	10.1	10.7	12.8	13.6	10.3	3.3	4.1	2.8	7.1	10.7	11.1	13.2	8	1	1	1	1	1	1	1	1						32.88	7.85657
[K].NMNIHIDVENSDSNGDVDK.[N]	2xTMT6plex [N-Term; K19]; 2xDeamidated [N10; N14]; 1xOxidation [M2]; 1xPhospho [S11(85.9)]	PBANKA_050730 1xPhospho [S1900(85.9)]	1	3	PBANKA_050730	dynein heavy chain, putative	PBANKA_050730 [1890-1908]	0	2672.18	S11(Phospho): 85.94	94.9	135.1	73	138.8	81.1	89.1	93.3	94.7	21.4	30.5	16.5	31.3	18.3	20.1	21.1	21.4	11.7	18.6	10.7	22	18.3	17.4	20.4	16.6	1	1	1	1	1	1	1	1	2.01535	High	8.95807	0.0003306	0.001454	33.06	8.95807
[K].SFDTSEDFSNYNENNNFYNMHNDEYK.[T]	2xTMT6plex [N-Term; K26]; 1xOxidation [M20]; 1xPhospho [S1(99.7)]	PBANKA_090690 1xPhospho [S2257(99.7)]	1	2	PBANKA_090690	conserved Plasmodium protein, unknown function	PBANKA_090690 [2257-2282]	0	3792.55	S1(Phospho): 99.71	91.5	138.4	86.3	151.8	75.6	84.3	90.6	81.7	13.6	20.5	12.8	22.5	11.2	12.5	13.4	12.1	7.4	12.5	8.3	15.8	11.2	10.8	13	9.4	1	1	1	1	1	1	1	1	3.00893	High	1.959	0.0001278	0.0007077	33.83	1.959
[K].HGHIDEDTNEINER.[F]	1xTMT6plex [N-Term]		1	4	PBANKA_136530	conserved Plasmodium protein, unknown function	PBANKA_136530 [208-221]	0	1907.9		55.5	96.6	67.4	103	95.9	111.8	89	180.9	13.2	23	16	24.5	22.8	26.6	21.2	43	7.2	14	10.4	17.2	22.8	23	20.5	33.4	2	2	2	2	2	2	2	2	2.50251	High	-0.0943176	3.638e-05	0.0001757	33.74	-0.0943176
[K].NIHHSNGTEK.[R]	2xTMT6plex [N-Term; K10]; 1xDeamidated [N6]; 2xPhospho [S5(100); T8(100)]	PBANKA_142830 2xPhospho [S997(100); T1000(100)]	1	1	PBANKA_142830	conserved Plasmodium protein, unknown function	PBANKA_142830 [993-1002]	0	1755.79	S5(Phospho): 100; T8(Phospho): 100	51.1	83.8	47.7	77.2	147.1	130.7	140.7	121.6	3.3	5.4	3.1	5	9.5	8.4	9.1	7.9	1.8	3.3	2	3.5	9.5	7.3	8.8	6.1	1	1	1	1	1	1	1	1	1.51497	High	0.270308	0.002742	0.02403
[K].NENNLAESDDEEDNDLYINSYVK.[K]	2xTMT6plex [N-Term; K23]; 3xDeamidated [N4; N14; N]; 1xPhospho [S8(99.1)]	PBANKA_050810 1xPhospho [S691(99.1)]	1	3	PBANKA_050810	chromodomain-helicase-DNA-binding protein 1, putative (CHD1)	PBANKA_050810 [684-706]	0	3244.4	S8(Phospho): 99.08	72.2	112.3	62.3	106.3	101.7	123.5	92.1	129.5	7	10.8	6	10.3	9.8	11.9	8.9	12.5	3.8	6.6	3.9	7.2	9.8	10.3	8.6	9.7	1	1	1	1	1	1	1	1	3.12967	High	11.2583	0	6.965e-05	33.92	11.2583
[K].REFDDESASNGHER.[I]	1xTMT6plex [N-Term]; 1xPhospho [S9(96.5)]		1	7	PBANKA_145530	conserved Plasmodium protein, unknown function	PBANKA_145530 [42-55]	1	1957.82	S9(Phospho): 99.53	51	69.5	67	122.2	100.3	117.3	99	173.7	4.6	6.2	6	11	9	10.5	8.9	15.6	2.5	3.8	3.9	7.7	9	9.1	8.6	12.1	1	1	1	1	1	1	1	1	2.43449	High	0.0597425	0.0001278	0.0007611	27.49	0.0597425
[K].EDLDEIILNNENTDMNTANTNNNNNSDSNNNK.[I]	2xTMT6plex [N-Term; K32]; 1xDeamidated [N]; 1xOxidation [M15]		1	105	PBANKA_092990	heat shock protein 90, putative	PBANKA_092990 [597-628]	0	4083.83		91.5	63.6	62.8	185.3	98.6	82.1	128.3	88	13.9	9.7	9.5	28.2	15	12.5	19.5	13.4	7.6	5.9	6.2	19.8	15	10.8	18.9	10.4	2	2	2	2	2	2	2	2	3.00275	High	4.0108	0	1.652e-06	54.08	4.0108
[K].EITESEEEAQDGEK.[K]	2xTMT6plex [N-Term; K14]; 2xPhospho [T3(100); S5(100)]	PBANKA_080570 2xPhospho [T218(100); S220(100)]	1	20	PBANKA_080570	heat shock protein 90, putative (HSP90)	PBANKA_080570 [216-229]	0	2211.93	T3(Phospho): 100; S5(Phospho): 100	73.7	94	92.5	174.9	86.2	97.3	105.4	76.1	329.3	420.3	413.2	781.7	385.1	434.7	471.2	340	179.8	256.2	268.3	549	385.1	375.9	456.3	264.1	8	8	8	8	8	8	8	8	4.75544	High	1.22801	0.0001087	0.0006132	51.39	1.04093
[R].LSTEDNNDDDETKGSYTNEEDNAPASEPYTDEDK.[N]	3xTMT6plex [N-Term; K13; K34]; 1xPhospho [T/S/Y]; 2xDeamidated [N]		1	12	PBANKA_041600	high molecular weight rhoptry protein 3, putative (RhopH3)	PBANKA_041600 [872-905]	1	4577.95		72.4	88.2	80.4	159.9	60.1	133.6	142.1	63.1	4.6	5.6	5.1	10.1	3.8	8.4	9	4	2.5	3.4	3.3	7.1	3.8	7.3	8.7	3.1	1	1	1	1	1	1	1	1	2.00076	High	8.40916	0.002364	0.01921	28.84	8.40916
[K].NSLENGNYDSDK.[N]	2xTMT6plex [N-Term; K12]; 1xPhospho [S2(98.7)]	PBANKA_091830 1xPhospho [S260(100)]	1	2	PBANKA_091830	transporter, putative	PBANKA_091830 [259-270]	0	1893.86	S2(Phospho): 100	78.2	104.3	82.1	155.1	93.7	108.9	101.8	75.8	64.7	86.3	67.9	128.3	77.5	90.1	84.2	62.7	35.3	52.6	44.1	90.1	77.5	77.9	81.5	48.7	1	1	1	1	1	1	1	1	4.06827	High	0.365189	0	3.165e-05	50.98	0.365189
[K].REDQVNENEGDEK.[G]	2xTMT6plex [N-Term; K13]		1	2	PBANKA_010560	translation initiation factor IF-2, putative	PBANKA_010560 [26-38]	1	2020		61.9	103.4	75.9	119.1	92.3	100.1	136.7	110.7	10.8	18	13.2	20.8	16.1	17.5	23.9	19.3	5.9	11	8.6	14.6	16.1	15.1	23.1	15	1	1	1	1	1	1	1	1	2.12738	High	0.774833	0.0009311	0.007049	17.13	0.774833
[K].LELNPEGNAENNQTNENQDTNNEESEIK.[Y]	2xTMT6plex [N-Term; K28]; 3xDeamidated [N/Q]		1	8	PBANKA_111860	cell division cycle protein 48 homologue, putative	PBANKA_111860 [715-742]	0	3648.67		48.1	118.9	87.1	98.7	98.8	140	111	97.4	6	14.9	10.9	12.4	12.4	17.6	13.9	12.2	3.3	9.1	7.1	8.7	12.4	15.2	13.5	9.5	1	1	1	1	1	1	1	1	1.87821	High	13.3366	0.004156	0.03508	19.7	13.3366
[K].DTNEEIIQSEKDSNNTPENIK.[S]	3xTMT6plex [N-Term; K11; K21]; 1xDeamidated [N]; 2xPhospho [S13(90.9); S/T]	PBANKA_131420 2xPhospho [S320(90.9); S/T]	1	3	PBANKA_131420	conserved Plasmodium protein, unknown function	PBANKA_131420 [308-328]	1	3266.53	S9(Phospho): 54.56; S13(Phospho): 90.86; T16(Phospho): 54.55	45.1	106.8	89.3	109.7	97.7	133.1	96.7	121.7	5.7	13.5	11.2	13.8	12.3	16.8	12.2	15.3	3.1	8.2	7.3	9.7	12.3	14.5	11.8	11.9	1	1	1	1	1	1	1	1	2.69739	High	7.98798	0.0001087	0.0005708	31.42	7.98798
[K].YENNGYMMDNAEISTEEDIIVK.[K]	2xTMT6plex [N-Term; K22]; 1xPhospho [T/S]; 3xDeamidated [N3; N4; N10]; 2xOxidation [M7; M8]	PBANKA_110510 1xPhospho [T/S]	1	3	PBANKA_110510	DNA mismatch repair protein MSH6, putative (MSH6)	PBANKA_110510 [112-133]	0	3151.37		77.6	91.2	37.7	93.9	149.8	83.9	136.2	129.8	8.2	9.7	4	10	15.9	8.9	14.5	13.8	4.5	5.9	2.6	7	15.9	7.7	14	10.7	2	2	1	2	2	2	2	2						28.67	7.86173
[R].QAELEGSDLFEEDDGFVFGEEDEK.[K]	2xTMT6plex [N-Term; K24]; 1xPhospho [S7(100)]; 1xDeamidated [Q1]	PBANKA_102490 1xPhospho [S42(100)]	1	10	PBANKA_102490	DNA replication licensing factor MCM2, putative (MCM2)	PBANKA_102490 [36-59]	0	3273.43		71.3	118.3	58.5	91	127.8	123.3	148.7	61.1	22.5	37.4	18.5	28.8	40.4	39	47	19.3	12.3	22.8	12	20.2	40.4	33.7	45.5	15	5	5	5	5	5	5	5	4	3.14148	High	2.90079	5.957e-05	0.0002919	36.98	2.90079
[K].ISMIPSFLFFSSPSYTNCFISSELNGK.[D]	2xTMT6plex [N-Term; K27]; 4xPhospho [S2; T16; S21; S22]; 1xDeamidated [N25]	PBANKA_041160 4xPhospho [S601; T615; S620; S621]	1	1	PBANKA_041160	conserved Plasmodium protein, unknown function	PBANKA_041160 [600-626]	0	3795.62		56.8	54.1	38.5	101.1	73	76.3	89.8	310.3	5.7	5.4	3.9	10.1	7.3	7.6	9	31	3.1	3.3	2.5	7.1	7.3	6.6	8.7	24.1	1	1	1	1	1	1	1	1						25.58	2.76339
[R].NDTSTTNNGGANSNNSNGEGQEK.[K]	2xTMT6plex [N-Term; K23]; 1xPhospho [T/S]		1	8	PBANKA_090690	conserved Plasmodium protein, unknown function	PBANKA_090690 [1375-1397]	0	2848.24	S13(Phospho): 42.23; S16(Phospho): 42.23	40.6	58.2	64.9	113.6	126.3	141	104.1	151.3	3.7	5.2	5.9	10.3	11.4	12.7	9.4	13.6	2	3.2	3.8	7.2	11.4	11	9.1	10.6	1	1	1	1	1	1	1	1	2.38464	High	0.305567	0.0003512	0.001621	35.49	0.305567
[R].AILMDLEPGTMDSVR.[A]	1xTMT6plex [N-Term]; 2xOxidation [M4; M11]; 1xPhospho [T/S]	PBANKA_120690 1xPhospho [S75(96.3)]	1	3	PBANKA_120690	tubulin beta chain, putative	PBANKA_120690 [63-77]	0	1988.93	S13(Phospho): 96.31	86.2	162.5	87.7	116.4	86.7	94.5	89.5	76.5	3.5	6.6	3.5	4.7	3.5	3.8	3.6	3.1	1.9	4	2.3	3.3	3.5	3.3	3.5	2.4	1	1	1	1	1	1	1	1	3.0891	High	-3.98374	0.0001278	0.0007723	27.19	-3.98374
[K].GNEDENSEDELLYEQAEIDDNENNNDKHTEIEK.[G]	3xTMT6plex [N-Term; K27; K33]; 1xPhospho [S7(100)]; 1xDeamidated [N/Q]	PBANKA_041170 1xPhospho [S251(100)]	1	17	PBANKA_041170	co-chaperone p23, putative	PBANKA_041170 [245-277]	1	4661.08		61.6	64.9	61	132.4	95	101.8	121.6	161.8	6.2	6.6	6.2	13.4	9.6	10.3	12.3	16.4	3.4	4	4	9.4	9.6	8.9	11.9	12.7	1	1	1	1	1	1	1	1	4.75702	High	3.32981	3.638e-05	0.0001461	60.08	3.32981
[R].GEDDTDDDEEDEEVYTANNPNDVNAK.[S]	2xTMT6plex [N-Term; K26]; 1xPhospho [Y/T]; 3xDeamidated [N18; N19; N21]	PBANKA_141730 1xPhospho [T/Y]	1	2	PBANKA_141730	translocation protein SEC63, putative (SEC63)	PBANKA_141730 [601-626]	0	3454.37		78.7	41.6		211.3	167.9	54.2	213.7	32.7	4	2.1		10.8	8.6	2.8	10.9	1.7	2.2	1.3		7.6	8.6	2.4	10.6	1.3	1	1		1	1	1	1	1	1.23695	Medium	9.35012	0.0165	0.1633	20.72	2.45923
[R].SINGSIANK.[E]	2xTMT6plex [N-Term; K9]; 1xPhospho [S1(100)]	PBANKA_081200 1xPhospho [S7]	1	1	PBANKA_081200	DNA primase large subunit, putative	PBANKA_081200 [7-15]	0	1441.78	S1(Phospho): 100	111.5	173	90.2	152.2	64.6	59.1	60.1	89.2	62.8	97.4	50.8	85.7	36.4	33.3	33.9	50.2	34.3	59.4	33	60.2	36.4	28.8	32.8	39	1	1	1	1	1	1	1	1	2.21616	Medium	1.30314	0.01229	0.121	32.36	1.30314
[R].QSGNYNNPDLK.[D]	2xTMT6plex [N-Term; K11]; 1xPhospho [S/Y]	PBANKA_040600 1xPhospho [S289(100)]	1	2	PBANKA_040600	conserved Plasmodium protein, unknown function	PBANKA_040600 [288-298]	0	1787.87	S2(Phospho): 100	104.9	173.2	124	195.4	58.9	59.3	38.3	46	38.5	63.5	45.4	71.6	21.6	21.7	14	16.9	21	38.7	29.5	50.3	21.6	18.8	13.6	13.1	1	1	1	1	1	1	1	1	3.68471	High	1.60949	0.0001278	0.0008001	25.8	1.60949
[K].LSNDETGESSDIDFSVAINQNLK.[K]	2xTMT6plex [N-Term; K23]; 1xPhospho [S/T]		1	6	PBANKA_114040	exosome complex component RRP45, putative (RRP45)	PBANKA_114040 [482-504]	0	3034.47	S9(Phospho): 46.23; S10(Phospho): 46.23	58	46.5	42	115	137.5	113.5	149.8	137.7	5.3	4.3	3.9	10.5	12.6	10.4	13.7	12.6	2.9	2.6	2.5	7.4	12.6	9	13.3	9.8	1	1	1	1	1	1	1	1	2.92047	High	-4.43595	0	4.565e-05	46.21	-4.43595
[K].RPSQDDSINEEGNNENSQIVTNK.[D]	2xTMT6plex [N-Term; K23]; 1xPhospho [S/T]	PBANKA_040400 1xPhospho [S3031(98.9)]	2	2	PBANKA_040400	conserved Plasmodium protein, unknown function	PBANKA_040400 [3025-3047]	0	3126.47		43	92.5	96.1	130.9	119.5	110.2	121.3	86.4	6.4	13.8	14.3	19.5	17.8	16.4	18.1	12.9	3.5	8.4	9.3	13.7	17.8	14.2	17.5	10	1	1	1	1	1	1	1	1	2.68323	High	1.20864	5.957e-05	0.0003208	44.44	1.20864
[K].TQSYEDSSTENASTSYMSTLKTDEESNTAGEDR.[K]	2xTMT6plex [N-Term; K21]; 1xOxidation [M17]; 2xPhospho [S/T/Y]		1	20	PBANKA_136550	intra-erythrocytic P. berghei-induced structures protein 1 (IBIS1)	PBANKA_136550 [101-133]	1	4268.76	S26(Phospho): 93.28; T28(Phospho): 93.28	82.4	119.3	72.1	128.9	109.9	89.6	96.7	101.1	31.5	45.6	27.6	49.3	42	34.2	37	38.6	17.2	27.8	17.9	34.6	42	29.6	35.8	30	4	4	4	4	4	4	4	4	3.66424	High	0.478676	0	1.647e-05	46.99	0.478676
[K].INDSDNDEMFNHDPIAPEIYLVGK.[N]	2xTMT6plex [N-Term; K24]; 1xOxidation [M9]; 1xPhospho [S4(100)]	PBANKA_134850 1xPhospho [S165(100)]	1	2	PBANKA_134850	conserved Plasmodium protein, unknown function	PBANKA_134850 [162-185]	0	3300.55	S4(Phospho): 100	52.9	140.2	68.6	54.9	139.7	123.9	120.6	99.2	4.4	11.6	5.7	4.6	11.6	10.3	10	8.2	2.4	7.1	3.7	3.2	11.6	8.9	9.7	6.4	1	1	1	1	1	1	1	1	2.49841	High	-3.74575	0.0007263	0.0042	42.71	-3.74575
[K].HSTNTDILNFEK.[K]	2xTMT6plex [N-Term; K12]; 1xPhospho [T3(98.7)]	PBANKA_092770 1xPhospho [T1734(98.7)]	1	4	PBANKA_092770	conserved Plasmodium protein, unknown function	PBANKA_092770 [1732-1743]	0	1956.98	T3(Phospho): 98.71	125	197.2	114	186.2	43.5	46.3	48.4	39.4	36.8	58.1	33.6	54.8	12.8	13.6	14.2	11.6	20.1	35.4	21.8	38.5	12.8	11.8	13.8	9	1	1	1	1	1	1	1	1	3.11125	High	-3.91911	0.0001929	0.0009563	30.39	-3.91911
[R].NINMNNENDISIGNLSDDEYLFDDAENEK.[L]	2xTMT6plex [N-Term; K29]; 1xPhospho [S11(75.6)]; 1xOxidation [M4]	PBANKA_141790 1xPhospho [S375(75.6)]	1	44	PBANKA_141790	conserved Plasmodium protein, unknown function	PBANKA_141790 [365-393]	0	3899.72		39.8	110.6	65.8	58.7	106.4	178.4	139.2	101.3	5.3	14.8	8.8	7.8	14.2	23.8	18.6	13.5	2.9	9	5.7	5.5	14.2	20.6	18	10.5	1	2	2	2	2	2	2	2	4.64771	High	2.3606	0	2.127e-07	75.44	-5.33977
[R].ERSHDSDILEQNR.[Y]	1xTMT6plex [N-Term]; 1xDeamidated [N/Q]; 1xPhospho [S3(100)]	PBANKA_031600 1xPhospho [S143(100)]	1	3	PBANKA_031600	replication factor C subunit 1, putative	PBANKA_031600 [141-153]	1	1908.87	S3(Phospho): 100	69.8	139.1	89.6	116.2	82.8	105.1	86.8	110.7	28.6	56.9	36.7	47.6	33.9	43	35.5	45.3	15.6	34.7	23.8	33.4	33.9	37.2	34.4	35.2	1	1	1	1	1	1	1	1	5.22003	High	10.2366	0	5.375e-05	17.37	10.2366
[K].DNNNNNSNNNNNDEIEK.[N]	2xTMT6plex [N-Term; K17]; 1xDeamidated [N]		1	9	PBANKA_122840	mannose-6-phosphate isomerase, putative	PBANKA_122840 [63-79]	0	2435.11		93.7	105.7	84.1	178.7	82.6	102.5	96.6	56.1	54.2	61.2	48.7	103.4	47.8	59.3	55.9	32.4	29.6	37.3	31.6	72.6	47.8	51.3	54.1	25.2	1	1	1	1	1	1	1	1	4.71179	High	8.80944	0	7.32e-07	75.02	8.80944
[R].NNTENANNDNENDDTINGESR.[K]	1xTMT6plex [N-Term]; 1xDeamidated [N]		1	13	PBANKA_092540	dynein heavy chain, putative	PBANKA_092540 [4457-4477]	0	2580.09		65.8	68.6	49.9	117.4	130.8	89.2	128.9	149.4	11.2	11.6	8.5	19.9	22.2	15.1	21.9	25.4	6.1	7.1	5.5	14	22.2	13.1	21.2	19.7	2	2	2	2	2	2	2	2	3.44562	High	-0.460686	0	1.256e-06	67.82	-0.460686
[K].INDSDNDEMFNHDPIAPEIYLVGK.[N]	2xTMT6plex [N-Term; K24]; 1xDeamidated [N]; 1xOxidation [M9]; 1xPhospho [S4(99.7)]	PBANKA_134850 1xPhospho [S165(99.7)]	1	4	PBANKA_134850	conserved Plasmodium protein, unknown function	PBANKA_134850 [162-185]	0	3301.54	S4(Phospho): 99.69	70.5	64.9	64.3	150.2	157.2	89	171.4	32.5	6.4	5.9	5.9	13.7	14.3	8.1	15.6	3	3.5	3.6	3.8	9.6	14.3	7	15.1	2.3	1	1	1	1	1	1	1	1	1.91299	High	0.800954	0.0002156	0.001054	35.97	0.800954
[K].LNEFVENNEQNESEVSNNK.[N]	2xTMT6plex [N-Term; K19]; 1xDeamidated [N/Q]; 1xPhospho [S]		1	7	PBANKA_050610	conserved Plasmodium protein, unknown function	PBANKA_050610 [1473-1491]	0	2776.27	S16(Phospho): 99.99	75.9	136.6	77.2	106.8	105.5	101.1	109	87.8	20.1	36.3	20.5	28.3	28	26.8	28.9	23.3	11	22.1	13.3	19.9	28	23.2	28	18.1	2	2	2	2	2	2	2	2	3.9073	High	6.84954	0	1.549e-06	54.58	6.84954
[K].SLNETENIYPK.[S]	2xTMT6plex [N-Term; K11]; 1xPhospho [S1(100)]	PBANKA_123730 1xPhospho [S224(100)]	1	6	PBANKA_123730	inner membrane complex protein, putative	PBANKA_123730 [224-234]	0	1845.94		97	135.2	85.2	154.2	80.3	91.4	82.9	74	54.4	75.8	47.7	86.4	45	51.2	46.5	41.5	29.7	46.2	31	60.7	45	44.3	45	32.2	2	2	2	2	2	2	2	2	3.06544	High	-2.64049	0.0004851	0.002429	28.9	-2.64049
[K].MSSINQISDDMVNNNSEILNNYK.[L]	2xTMT6plex [N-Term; K23]; 1xDeamidated [N/Q]; 2xOxidation [M1; M11]; 1xPhospho [S/Y]		1	29	PBANKA_122440	ferlin, putative	PBANKA_122440 [561-583]	0	3214.47	S2(Phospho): 49.96; S3(Phospho): 49.96	93.7	127.5	64.9	124.8	117.5	92.6	110.1	68.9	19.8	26.9	13.7	26.3	24.8	19.5	23.2	14.5	10.8	16.4	8.9	18.5	24.8	16.9	22.5	11.3	2	2	2	2	2	2	2	2	2.66433	High	5.04451	0.0007888	0.004538	33.88	4.53603
[K].EIDEDINHKSDNDNLVGSANASSNDYVSVYPENVNR.[N]	2xTMT6plex [N-Term; K9]; 1xDeamidated [N]; 1xPhospho [S10(82.4)]	PBANKA_144990 1xPhospho [S1037(82.4)]	1	2	PBANKA_144990	CCR4-NOT transcription complex subunit 4, putative (NOT4)	PBANKA_144990 [1028-1063]	1	4533.07	S10(Phospho): 82.45	76.2		76.1	118.4	200.1	96.2	99.3	133.8	2.9		2.9	4.6	7.7	3.7	3.8	5.2	1.6		1.9	3.2	7.7	3.2	3.7	4	1		1	1	1	1	1	1	2.39367	High	5.12009	0.003682	0.03007
[K].EINTISYELEDSGSENEEENSEDNKKK.[N]	4xTMT6plex [N-Term; K25; K26; K27]; 3xPhospho [S12; S14; S21]; 2xDeamidated [N20; N]	PBANKA_123220 3xPhospho [S443; S445; S452]	1	3	PBANKA_123220	FACT complex subunit SPT16 (FACT-L)	PBANKA_123220 [432-458]	2	4288.9			74	41.7	57.8	143.1	144.7	167.6	171.2		6.6	3.7	5.1	12.7	12.8	14.9	15.2		4	2.4	3.6	12.7	11.1	14.4	11.8		1	1	1	1	1	1	1						23.07	7.61263
[R].YELLESHDLEDK.[Y]	2xTMT6plex [N-Term; K12]; 1xPhospho [S6(100)]	PBANKA_140650 1xPhospho [S56(100)]	1	2	PBANKA_140650	conserved Plasmodium protein, unknown function	PBANKA_140650 [51-62]	0	2028.99	S6(Phospho): 99.98	95	104.1	100.3	204.7	79.3	86	94.9	35.7	28.8	31.5	30.3	61.9	24	26	28.7	10.8	15.7	19.2	19.7	43.5	24	22.5	27.8	8.4	1	1	1	1	1	1	1	1	2.97294	High	1.6306	8.7e-05	0.0004535	33.94	1.6306
[K].HTNSNNNLVNNK.[N]	2xTMT6plex [N-Term; K12]; 1xDeamidated [N]; 1xPhospho [S/T]		1	19	PBANKA_133750	conserved Plasmodium protein, unknown function	PBANKA_133750 [1422-1433]	0	1907.94	S4(Phospho): 99.96	119.3	184.3	108.1	175	55.1	50.5	51.2	56.5	319.8	494.2	289.9	469.3	147.7	135.3	137.2	151.5	174.6	301.3	188.2	329.6	147.7	117	132.9	117.7	5	5	5	5	5	5	5	5	4.90731	High	0.213612	3.638e-05	0.000161	40.29	1.65317
[K].IEHDNIDTNEDDINIQNIFK.[S]	2xTMT6plex [N-Term; K20]; 1xPhospho [T8(100)]	PBANKA_102350 1xPhospho [T414(100)]	1	4	PBANKA_102350	conserved Plasmodium protein, unknown function	PBANKA_102350 [407-426]	0	2938.42	T8(Phospho): 100	47.3	121.6	106.1	119.7	110.6	104.9	111.4	78.4	7.1	18.4	16	18.1	16.7	15.8	16.8	11.8	3.9	11.2	10.4	12.7	16.7	13.7	16.3	9.2	1	1	1	1	1	1	1	1	3.69631	High	-7.52288	0	5.653e-05	42.68	2.01119
[K].NNYVDNDSDYLK.[A]	2xTMT6plex [N-Term; K12]; 1xPhospho [Y/S]; 1xDeamidated [N]	PBANKA_010480 1xPhospho [S140(92)]	1	7	PBANKA_010480	conserved Plasmodium protein, unknown function	PBANKA_010480 [133-144]	0	1998.91		50	112.7	90.5	108.5	130.8	136.9	90.6	79.9	6	13.6	10.9	13.1	15.8	16.5	10.9	9.7	3.3	8.3	7.1	9.2	15.8	14.3	10.6	7.5	1	1	1	1	1	1	1	1	1.95331	High	1.29987	0.0002967	0.001234	28.82	1.29987
[K].QNSVNIIK.[K]	2xTMT6plex [N-Term; K8]; 1xPhospho [S3(100)]	PBANKA_100580 1xPhospho [S36(100)]	1	2	PBANKA_100580	conserved Plasmodium protein, unknown function	PBANKA_100580 [34-41]	0	1453.82		116.1	181.5	114.3	181.8	48.3	53.4	47.5	56.9	207.7	324.8	204.5	325.4	86.5	95.6	85	101.8	113.4	198	132.8	228.5	86.5	82.7	82.3	79.1	2	2	2	2	2	2	2	2	3.1767	High	0.698702	0.0007888	0.004466	21.2	0.698702
[K].SSIDTDNEHNNNLNTMNSK.[T]	2xTMT6plex [N-Term; K19]; 1xOxidation [M16]; 1xPhospho [T/S]		1	3	PBANKA_130680	protein transport protein SEC7, putative (SEC7)	PBANKA_130680 [1720-1738]	0	2702.21	T15(Phospho): 49.93; S18(Phospho): 49.93	87.8	128.3	106.5	178.2	69.6	71.2	73.5	85.1	17.4	25.4	21.1	35.3	13.8	14.1	14.6	16.9	9.5	15.5	13.7	24.8	13.8	12.2	14.1	13.1	1	1	1	1	1	1	1	1	1.68845	High	-1.80652	0.002719	0.02264	29.08	-1.80652
[K].SINSHNEK.[N]	2xTMT6plex [N-Term; K8]; 1xPhospho [S1(100)]	PBANKA_121540 1xPhospho [S804]	1	1	PBANKA_121540	conserved Plasmodium protein, unknown function	PBANKA_121540 [804-811]	0	1466.74	S1(Phospho): 99.97	94.9	146	75.9	123.9	96.5	87.2	77.9	97.8	18.9	29	15.1	24.6	19.2	17.3	15.5	19.4	10.3	17.7	9.8	17.3	19.2	15	15	15.1	1	1	1	1	1	1	1	1	1.67715	Medium	0.771664	0.01936	0.1887	20.62	0.771664
[K].NLDKNSDIDSEDSRK.[I]	3xTMT6plex [N-Term; K4; K15]; 3xPhospho [S6(100); S10(100); S13(100)]	PBANKA_120210 3xPhospho [S653(100); S657(100); S660(100)]	1	1	PBANKA_120210	conserved Plasmodium protein, unknown function	PBANKA_120210 [648-662]	2	2663.2	S6(Phospho): 100; S10(Phospho): 100; S13(Phospho): 100	74.8	95.6	100.1	179.5	90.1	105.2	104.7	50	81.3	103.8	108.7	195.1	97.9	114.4	113.8	54.3	44.4	63.3	70.6	137	97.9	98.9	110.2	42.2	1	1	1	1	1	1	1	1	5.03388	High	-1.52912	0.0002581	0.001146	13.6	-1.52912
[K].NNENDGNNNNDKPQESDEKDEK.[L]	4xTMT6plex [N-Term; K12; K19; K22]; 1xPhospho [S16(100)]	PBANKA_080410 1xPhospho [S756(100)]	1	1	PBANKA_080410	conserved Plasmodium protein, unknown function	PBANKA_080410 [741-762]	1	3543.66	S16(Phospho): 100	70.9	91.5	85.9	154.7	84.1	101.4	106.9	104.6	22	28.4	26.6	48	26.1	31.5	33.1	32.4	12	17.3	17.3	33.7	26.1	27.2	32.1	25.2	1	1	1	1	1	1	1	1	3.29652	High	1.32479	0.003503	0.02816
[K].GIETHGSDK.[L]	2xTMT6plex [N-Term; K9]; 1xPhospho [T/S]	PBANKA_050920 1xPhospho [S266(100)]	1	4	PBANKA_050920	formin 2, putative	PBANKA_050920 [260-268]	0	1481.74		72.2	109.8	94.9	152.6	99.9	102.5	97.8	70.3	70.3	107	92.4	148.7	97.3	99.8	95.3	68.5	38.4	65.2	60	104.4	97.3	86.3	92.3	53.2	2	2	2	2	2	2	2	2	2.57832	High	0.804151	0.002818	0.02466	24.99	0.804151
[K].HVGTDTFDINNETTIMMEENENSENYIK.[S]	2xTMT6plex [N-Term; K28]; 1xPhospho [T/S]; 2xDeamidated [N20; N22]; 2xOxidation [M16; M17]	PBANKA_060630 1xPhospho [S/T]	1	3	PBANKA_060630	conserved Plasmodium protein, unknown function	PBANKA_060630 [491-518]	0	3860.68		53.3	101.8	56.7	69	159	71.7	136.1	152.3	2.7	5.2	2.9	3.6	8.2	3.7	7	7.9	1.5	3.2	1.9	2.5	8.2	3.2	6.8	6.1	1	1	1	1	1	1	1	1						12.89	11.6294
[K].DSYSDYEYSK.[N]	2xTMT6plex [N-Term; K10]; 1xPhospho [Y/S]		1	3	PBANKA_091070	conserved Plasmodium protein, unknown function	PBANKA_091070 [81-90]	0	1794.79	Y3(Phospho): 47.55; S4(Phospho): 47.55	77.3	109.2	84.2	144.7	117.1	85.9	92.7	88.8	13	18.4	14.2	24.3	19.7	14.5	15.6	14.9	7.1	11.2	9.2	17.1	19.7	12.5	15.1	11.6	1	1	1	1	1	1	1	1	1.86518	High	0.692476	0.004757	0.04022	17.75	0.692476
[R].STDKEEVEEINK.[I]	3xTMT6plex [N-Term; K4; K12]; 1xPhospho [T2(99.6)]		1	9	PBANKA_091610	nucleic acid binding protein, putative	PBANKA_091610 [19-30]	1	2188.14	S1(Phospho): 99.27	75.3	100.5	91.1	160.8	96.2	103.6	118.1	54.5	257.9	344	311.9	550.5	329.3	354.9	404.3	186.7	140.8	209.7	202.5	386.6	329.3	306.9	391.5	145	3	3	3	3	3	3	3	3	3.66522	High	-4.98634	0.0003306	0.001511	11.59	-4.98634
[K].GKDEVSEEEDDEENDEEESNEHNK.[N]	3xTMT6plex [N-Term; K2; K24]; 2xDeamidated [N14; N20]; 2xPhospho [S6(100); S19(100)]	PBANKA_080230 2xPhospho [S192(100); S205(100)]	1	5	PBANKA_080230	E3 ubiquitin-protein ligase, putative	PBANKA_080230 [187-210]	1	3684.47	S6(Phospho): 100; S19(Phospho): 100	76.4	114.5	98.1	159.3	83	93.3	115.3	60.2	36.4	54.6	46.8	76	39.6	44.5	55	28.7	19.9	33.3	30.4	53.4	39.6	38.5	53.3	22.3	3	3	3	3	3	3	3	3	3.17735	High	8.67152	0.001573	0.01218	37.87	8.67152
[R].VIKDDNNENNNSINNSDTMSSGSYR.[D]	2xTMT6plex [N-Term; K3]; 1xDeamidated [N]; 1xOxidation [M19]; 2xPhospho [S/T/Y]	PBANKA_092540 2xPhospho [S/Y/T]	1	11	PBANKA_092540	dynein heavy chain, putative	PBANKA_092540 [1822-1846]	1	3423.44	S20(Phospho): 42.54; S21(Phospho): 42.54; S23(Phospho): 42.54; Y24(Phospho): 42.54	56.5	115.6	75.1	91.4	107.6	102.7	96	155.1	13.6	27.7	18	21.9	25.8	24.6	23	37.2	7.4	16.9	11.7	15.4	25.8	21.3	22.3	28.9	2	2	2	2	2	2	2	2	1.75648	High	5.28971	0.002068	0.01553	28.98	6.63078
[K].DEVFDDQTSDYMSDEHEK.[I]	2xTMT6plex [N-Term; K18]; 1xDeamidated [Q7]; 1xOxidation [M12]; 2xPhospho [T8(84.9); S9(84.9)]	PBANKA_090660 2xPhospho [T428(84.9); S429(84.9)]	1	4	PBANKA_090660	coproporphyrinogen-III oxidase, putative (CPO)	PBANKA_090660 [421-438]	0	2825.08	T8(Phospho): 84.87; S9(Phospho): 84.87	87.7	63.3	75.8	193.2	86.5	123.1	107.1	63.4	6.6	4.8	5.7	14.5	6.5	9.3	8.1	4.8	3.6	2.9	3.7	10.2	6.5	8	7.8	3.7	1	1	1	1	1	1	1	1	1.45574	High	6.60912	0.002115	0.01634	21.61	6.60912
[K].NQNENQNENQNENQNENENK.[N]	2xTMT6plex [N-Term; K20]		1	3	PBANKA_031170	rhoptry neck protein 6, putative (RON6)	PBANKA_031170 [264-283]	0	2903.32		117.8	89.2	68.6	204.2	143.4	65.8	66.4	44.6	4.8	3.6	2.8	8.3	5.8	2.7	2.7	1.8	2.6	2.2	1.8	5.8	5.8	2.3	2.6	1.4	1	1	1	1	1	1	1	1	2.37225	High	0.374749	0	2.923e-05	37.24	0.374749
[K].INTVENEESENYNEEER.[G]	1xTMT6plex [N-Term]; 2xPhospho [T3(100); S9(81.8)]	PBANKA_145460 2xPhospho [T1920(100); S1926(81.8)]	1	6	PBANKA_145460	conserved Plasmodium protein, unknown function	PBANKA_145460 [1918-1934]	0	2486.98	T3(Phospho): 100; S9(Phospho): 96.61	89.4	129.6	90.7	151.6	75.8	93.7	73.7	95.5	22.2	32.2	22.5	37.6	18.8	23.2	18.3	23.7	12.1	19.6	14.6	26.4	18.8	20.1	17.7	18.4	1	1	1	1	1	1	1	1	4.56485	High	2.32049	0	3.953e-05	65.24	2.32049
[K].EITESEEEAQDGEK.[K]	2xTMT6plex [N-Term; K14]; 2xPhospho [T3(100); S5]; 1xDeamidated [Q10]	PBANKA_080570 2xPhospho [T218(100); S220(100)]	1	5	PBANKA_080570	heat shock protein 90, putative (HSP90)	PBANKA_080570 [216-229]	0	2212.92		79.1	94.7	88.2	166.2	87.1	108.6	95.7	80.4	99.8	119.4	111.2	209.6	109.9	136.9	120.7	101.5	54.5	72.8	72.2	147.2	109.9	118.4	116.9	78.8	3	3	3	3	3	3	3	3	4.43182	High	2.96183	5.957e-05	0.0003902	42.81	2.96183
[K].DKENENEATDDDTDSIGPKPLDINVK.[L]	4xTMT6plex [N-Term; K2; K19; K26]; 2xPhospho [T9(79.7); S15(79.7)]	PBANKA_121900 2xPhospho [T649(79.7); S655(79.7)]	1	1	PBANKA_121900	heat shock protein 90, putative	PBANKA_121900 [641-666]	1	3948.92	T9(Phospho): 79.68; S15(Phospho): 79.68	78.2	114.2	89.5	146.9	92.5	101.5	101.3	75.9	19.8	28.9	22.6	37.2	23.4	25.7	25.6	19.2	10.8	17.6	14.7	26.1	23.4	22.2	24.8	14.9	1	1	1	1	1	1	1	1	2.95156	High	-2.36348	0.0009311	0.007245
[R].NINMNNENDISIGNLSDDEYLFDDAENEK.[L]	2xTMT6plex [N-Term; K29]; 1xPhospho [S/Y]; 1xDeamidated [N]; 1xOxidation [M4]		1	158	PBANKA_141790	conserved Plasmodium protein, unknown function	PBANKA_141790 [365-393]	0	3900.7		50.5	82.4	83.5	126.3	107.4	151.6	152.6	45.7	5.1	8.4	8.5	12.8	10.9	15.4	15.5	4.6	2.8	5.1	5.5	9	10.9	13.3	15	3.6	1	2	2	2	2	2	2	2	3.09871	High	5.64407	0	1.355e-05	48.68	7.33397
[K].QSNSISPIK.[E]	2xTMT6plex [N-Term; K9]; 1xPhospho [S4(99.9)]	PBANKA_062130 1xPhospho [S304(99.9)]	1	2	PBANKA_062130	conserved Plasmodium protein, unknown function	PBANKA_062130 [301-309]	0	1511.82	S4(Phospho): 99.9	110.4	171.7	95.3	149	67.7	63.2	73.2	69.5	111.5	173.4	96.3	150.5	68.4	63.8	73.9	70.2	60.9	105.7	62.5	105.7	68.4	55.2	71.6	54.5	1	1	1	1	1	1	1	1	3.14597	High	1.73076	0.0004268	0.001837	38.37	1.73076
[K].VINGNLDSNVDINESDHIK.[R]	2xTMT6plex [N-Term; K19]; 2xDeamidated [N]; 1xPhospho [S15(99.9)]	PBANKA_132920 1xPhospho [S2541(99.9)]	1	3	PBANKA_132920	dynein beta chain, putative	PBANKA_132920 [2527-2545]	0	2636.29	S15(Phospho): 99.86	72	134.7	73	91.4	79.2	133	123.6	93.1	12.5	23.3	12.6	15.8	13.7	23	21.4	16.1	6.8	14.2	8.2	11.1	13.7	19.9	20.7	12.5	1	1	1	1	1	1	1	1	2.62447	High	6.25117	0.0001278	0.0007103	52.23	6.25117
[R].TPNVYVSK.[I]	2xTMT6plex [N-Term; K8]; 1xPhospho [T/Y/S]	PBANKA_090880 1xPhospho [T263(100)]	1	3	PBANKA_090880	conserved Plasmodium protein, unknown function	PBANKA_090880 [263-270]	0	1445.78		98	124.6	103.8	189.4	82.2	69.8	58	74.3	154.4	196.4	163.6	298.4	129.6	110	91.4	117.2	84.3	119.7	106.2	209.6	129.6	95.1	88.5	91	2	2	2	2	2	2	2	2	2.66013	High	-0.414029	0.001411	0.01082	30.88	0.599157
[K].EAENVDVENTDVENTDVENIDVK.[N]	2xTMT6plex [N-Term; K23]; 1xPhospho [T15(85)]; 1xDeamidated [N]	PBANKA_092770 1xPhospho [T920(85)]	1	11	PBANKA_092770	conserved Plasmodium protein, unknown function	PBANKA_092770 [906-928]	0	3129.44	T10(Phospho): 50; T15(Phospho): 50	56.5	59.3	59	119.7	124.5	118.1	139.5	123.3	5.3	5.6	5.5	11.2	11.7	11.1	13.1	11.6	2.9	3.4	3.6	7.9	11.7	9.6	12.7	9	1	1	1	1	1	1	1	1	3.06587	High	8.45531	0	2.784e-05	49.66	8.45531
[K].HNETENSNNNVNEK.[G]	2xTMT6plex [N-Term; K14]		1	2	PBANKA_142110	transcription elongation factor s-II, putative	PBANKA_142110 [112-125]	0	2101.03		63.1	70.2	56.7	116.8	102.2	100.3	123.9	166.8	5.3	5.9	4.8	9.8	8.6	8.4	10.4	14	2.9	3.6	3.1	6.9	8.6	7.3	10.1	10.9	1	1	1	1	1	1	1	1	2.72383	High	0.8696	0	9.314e-06	55.34	0.8696
[K].FESSYPEQSMDLEDMR.[L]	1xTMT6plex [N-Term]; 1xPhospho [S/Y]; 2xOxidation [M10; M15]	PBANKA_070770 1xPhospho [S720(99.5)]	1	2	PBANKA_070770	conserved Plasmodium protein, unknown function	PBANKA_070770 [712-727]	0	2304.92		64.3	111	85.7	121.9	95.1	111.9	118.5	91.5	7.5	13	10	14.2	11.1	13.1	13.8	10.7	4.1	7.9	6.5	10	11.1	11.3	13.4	8.3	1	1	1	1	1	1	1	1	1.80148	High	0.958243	0.0001087	0.0005244	17.34	0.958243
[R].TNSSLFFSNNDNMSNNNESK.[A]	2xTMT6plex [N-Term; K20]; 1xPhospho [T/S]; 1xDeamidated [N]; 1xOxidation [M13]	PBANKA_145780 1xPhospho [S263(86)]	1	221	PBANKA_145780	ADP-ribosylation factor GTPase-activating protein, putative (ARFGAP)	PBANKA_145780 [261-280]	0	2819.22		111.2	171	100.4	157.9	63.2	69.3	58.8	68	256	393.7	231.2	363.5	145.5	159.6	135.4	156.4	139.8	240	150.1	255.3	145.5	138	131.1	121.5	13	13	13	13	13	13	13	13	4.26646	High	1.45918	0	6.704e-05	67.46	0.160204
[R].ISHDDNYNK.[R]	2xTMT6plex [N-Term; K9]; 1xPhospho [S2(100)]	PBANKA_120270 1xPhospho [S38(100)]	1	7	PBANKA_120270	RNA-binding protein, putative	PBANKA_120270 [37-45]	0	1643.78	S2(Phospho): 100	87.8	98.6	84.3	168.8	88.6	98	104.4	69.5	143	160.6	137.4	275	144.4	159.7	170.2	113.2	78.1	97.9	89.2	193.1	144.4	138.1	164.8	87.9	3	3	3	3	3	3	3	3	3.91605	High	0.954266	0.0004851	0.00241	35.18	0.954266
[R].NSLNNMANSNNNQNNPNTPR.[N]	1xTMT6plex [N-Term]; 1xPhospho [S/T]; 2xDeamidated [N/Q]; 1xOxidation [M6]	PBANKA_070450 1xPhospho [T2741(96.6)]	1	11	PBANKA_070450	E3 ubiquitin-protein ligase, putative	PBANKA_070450 [2724-2743]	0	2555.08		65.8		68.1	106.2	82.8	217.1	199.6	60.4	2.4		2.5	3.8	3	7.9	7.2	2.2	1.3		1.6	2.7	3	6.8	7	1.7	1		1	1	1	1	1	1	1.8842	High	7.34825	0.0005936	0.002681	21.67	7.34825
[K].NNVSPSK.[S]	2xTMT6plex [N-Term; K7]; 1xPhospho [S4(100)]; 1xDeamidated [N1]	PBANKA_121930 1xPhospho [S560(99.4)]	1	1	PBANKA_121930	heat shock protein 110, putative (HSP110c)	PBANKA_121930 [557-563]	0	1284.66		91.1	106.3	68.7	141.7	100.1	84.6	102.1	105.4	28.4	33.1	21.4	44.1	31.2	26.4	31.8	32.8	15.5	20.2	13.9	31	31.2	22.8	30.8	25.5	1	1	1	1	1	1	1	1	1.69984	High	0.55252	0.005386	0.04738	15.72	0.55252
[R].VNSMNSIK.[C]	2xTMT6plex [N-Term; K8]; 1xOxidation [M4]; 2xPhospho [S3(100); S6(100)]	PBANKA_122700 2xPhospho [S269; S272]	1	2	PBANKA_122700	SF-assemblin, putative	PBANKA_122700 [267-274]	0	1526.71	S3(Phospho): 100; S6(Phospho): 100	72.4	60	39.6	112.5	85	137.1	93.8	199.7	7.3	6.1	4	11.4	8.6	13.9	9.5	20.2	4	3.7	2.6	8	8.6	12	9.2	15.7	1	1	1	1	1	1	1	1	1.61073	Medium	1.01354	0.02416	0.2403	25.09	1.01354
[K].NLSPNNEDNNLLIEENNELR.[R]	1xTMT6plex [N-Term]; 1xPhospho [S3(100)]	PBANKA_010220 1xPhospho [S826(100)]	1	2	PBANKA_010220	trophozoite exported protein 1, putative (TEX1)	PBANKA_010220 [824-843]	0	2663.25	S3(Phospho): 100	85.2	132.5	73.5	113.3	121.2	103.3	117.5	53.6	7	10.8	6	9.3	9.9	8.4	9.6	4.4	3.8	6.6	3.9	6.5	9.9	7.3	9.3	3.4	1	1	1	1	1	1	1	1	4.10688	High	-1.19206	0	3.397e-05	51.05	-1.19206
[K].STNSQSDLNDDDDASFTLR.[K]	1xTMT6plex [N-Term]; 1xPhospho [S/T]	PBANKA_090960 1xPhospho [S355(90)]	1	10	PBANKA_090960	transcription factor with AP2 domain(s), putative (ApiAP2)	PBANKA_090960 [350-368]	0	2410.02		71.7	112.2	72.3	110	111.3	92.5	106.9	123.2	28.4	44.5	28.6	43.6	44.1	36.7	42.3	48.8	15.5	27.1	18.6	30.6	44.1	31.7	41	37.9	3	3	3	3	3	3	3	3	4.07595	High	1.35111	0	5.823e-07	70.45	1.19915
[K].ITSTSENTGTNK.[V]	2xTMT6plex [N-Term; K12]; 1xPhospho [T2(77.3)]	PBANKA_112350 1xPhospho [T2426(77.3)]	1	8	PBANKA_112350	SNF2 helicase, putative (ISWI)	PBANKA_112350 [2425-2436]	0	1790.89	T2(Phospho): 77.32	79.4	136.2	95.1	133.6	89.6	77.6	93.9	94.6	41.4	71	49.6	69.6	46.7	40.5	48.9	49.3	22.6	43.3	32.2	48.9	46.7	35	47.4	38.3	2	2	2	2	2	2	2	2	2.18344	High	-0.0871912	0.0006943	0.003827	33.28	-0.0871912
[K].NDDTNNAEHENLNKSDNK.[L]	3xTMT6plex [N-Term; K14; K18]; 1xPhospho [S15(86.5)]	PBANKA_133200 1xPhospho [S45(100)]	1	2	PBANKA_133200	splicing factor U2AF large subunit, putative (U2AF2)	PBANKA_133200 [31-48]	1	2839.35	S15(Phospho): 100	70.9	100.9	100.3	163.3	99.7	117	109.9	38	37.9	54	53.6	87.3	53.3	62.6	58.8	20.3	20.7	32.9	34.8	61.3	53.3	54.1	56.9	15.8	1	1	1	1	1	1	1	1	5.35514	High	-0.923094	0	1.923e-06	25.52	-0.923094
[K].NIPFDENISEDSHILR.[N]	1xTMT6plex [N-Term]; 1xPhospho [S9(85.1)]	PBANKA_102380 1xPhospho [S415(85.1)]	1	2	PBANKA_102380	conserved Plasmodium protein, unknown function	PBANKA_102380 [407-422]	0	2208.05	S9(Phospho): 85.1	47.1	69.3	56.6	91.6	119.4	82.9	184	149	2.6	3.8	3.1	5	6.5	4.5	10	8.1	1.4	2.3	2	3.5	6.5	3.9	9.7	6.3	1	1	1	1	1	1	1	1	2.75551	High	1.36267	0.000388	0.001769	27.34	1.36267
[K].QDSCNNLDDKPEDRENDDMYEQNNEDVEEK.[K]	2xTMT6plex [K10; K30]; 1xAcetyl [N-Term]; 6xDeamidated [Q/N]	PBANKA_132100 1xAcetyl [N-Term]	1	2	PBANKA_132100	conserved Plasmodium protein, unknown function	PBANKA_132100 [238-267]	1	4136.68		112.3	100.6	39.1	133.5	65.7	144.9	102.2	101.5	12.8	11.5	4.5	15.2	7.5	16.5	11.7	11.6	7	7	2.9	10.7	7.5	14.3	11.3	9	1	1	1	1	1	1	1	1						36.08	9.8703
[K].HDDENCGYNEENMYEAYNGNPESMDYNEEMIK.[Q]	2xTMT6plex [N-Term; K32]; 2xPhospho [S23; Y]; 1xDeamidated [N]; 1xOxidation [M30]	PBANKA_052390 2xPhospho [S306; Y]	1	6	PBANKA_052390	glideosome associated protein with multiple membrane spans 2, putative (GAPM2)	PBANKA_052390 [284-315]	0	4482.68		64.2	69.4	63.3	127.4	133	110.4	112.4	119.9	5.3	5.7	5.2	10.5	11	9.1	9.3	9.9	2.9	3.5	3.4	7.4	11	7.9	9	7.7	1	1	1	1	1	1	1	1						19.07	6.70856
[K].ADNSSLNNNTLGNETFSIAYDEEK.[N]	2xTMT6plex [N-Term; K24]; 1xPhospho [S/Y/T]; 2xDeamidated [N]	PBANKA_100880 1xPhospho [S186(85)]	1	23	PBANKA_100880	glucose-6-phosphate isomerase, putative	PBANKA_100880 [182-205]	0	3186.44	S5(Phospho): 84.98	50.2	106.7	98.1	120.9	115.7	129.1	88.4	90.8	7.3	15.6	14.3	17.7	16.9	18.8	12.9	13.3	4	9.5	9.3	12.4	16.9	16.3	12.5	10.3	1	1	1	1	1	1	1	1	2.96918	High	12.2215	0.0001087	0.0005395	44.38	12.3364
[K].NSNHSNDIHNDEEAK.[W]	2xTMT6plex [N-Term; K15]; 1xPhospho [S]	PBANKA_091260 1xPhospho [S1117(88.6)]	1	9	PBANKA_091260	conserved Plasmodium protein, unknown function	PBANKA_091260 [1113-1127]	0	2262.02		78	125.4	81.8	121.3	102.5	110.3	104.9	75.9	42.9	68.9	45	66.6	56.3	60.6	57.6	41.7	23.4	42	29.2	46.8	56.3	52.4	55.8	32.4	3	4	4	4	4	4	4	4	3.76264	High	0.80695	0	1.95e-05	39.02	0.80695
[R].NNDFEEFENEEESEDEKIK.[E]	3xTMT6plex [N-Term; K17; K19]; 1xPhospho [S13(100)]	PBANKA_110460 1xPhospho [S285(100)]	1	4	PBANKA_110460	conserved Plasmodium protein, unknown function	PBANKA_110460 [273-291]	1	3141.44	S13(Phospho): 100	82.3	101.3	92.4	168	97.1	106.6	102.6	49.7	72.2	88.7	81	147.2	85.1	93.4	89.9	43.5	39.4	54.1	52.6	103.4	85.1	80.8	87.1	33.8	2	2	2	2	2	2	2	2	3.7312	High	3.44428	0	7.47e-05	37.36	3.44428
[K].NNELNIDQSLESENHDLGNK.[N]	2xTMT6plex [N-Term; K20]; 1xPhospho [S]		1	7	PBANKA_080800	cdc2-related protein kinase 4 (CRK4)	PBANKA_080800 [11-30]	0	2821.34	S12(Phospho): 84.08	73.8	116.1	83.3	125.4	105.3	96.2	93.3	106.7	25.6	40.4	29	43.6	36.6	33.4	32.4	37.1	14	24.6	18.8	30.6	36.6	28.9	31.4	28.8	2	2	2	2	2	2	2	2	3.21847	High	-4.50583	0	0.0001118	35.52	-5.39756
[K].FDSDNETTNK.[D]	2xTMT6plex [N-Term; K10]; 1xPhospho [S3(100)]	PBANKA_093720.2 1xPhospho [S706(100)]	2	8	PBANKA_093720.2	asparagine-rich antigen, putative	PBANKA_093720.2 [704-713]	0	1708.78	S3(Phospho): 100	86.1	99.3	89.7	171	87	94.6	97.9	74.4	368.3	425	383.8	731.6	372.3	404.8	419	318.2	201.1	259.1	249.2	513.8	372.3	350.1	405.8	247.1	5	5	5	5	5	5	5	5	3.53943	High	1.14105	0.0001742	0.0008394	40.5	1.14105
[K].NTDNNINENNSTNNDGIGNCDNR.[K]	1xTMT6plex [N-Term]; 2xDeamidated [N]; 1xCarbamidomethyl [C20]		1	3	PBANKA_145480	RNA-binding protein, putative	PBANKA_145480 [441-463]	0	2810.17		65	107.3	65.5	93.2	112.6	95.1	87.3	173.9	13.9	23	14	19.9	24.1	20.4	18.7	37.2	7.6	14	9.1	14	24.1	17.6	18.1	28.9	1	1	1	1	1	1	1	1	2.08211	High	11.2379	0.0004268	0.001812
[K].QNIDLIELNEDGNTNNNIDDSK.[Q]	2xTMT6plex [N-Term; K22]; 1xPhospho [T14(100)]; 1xDeamidated [N]	PBANKA_124270 1xPhospho [T680(100)]	1	9	PBANKA_124270	AP-1 complex subunit beta, putative	PBANKA_124270 [667-688]	0	3027.42			66.5	67.6	141.9	111.5	134.8	125.6	152.2		3.9	4	8.4	6.6	8	7.4	9		2.4	2.6	5.9	6.6	6.9	7.2	7		1	1	1	1	1	1	1	1.90169	High	1.28531	0.0001087	0.0004966	54.03	1.28531
[K].NPNEPILSDDELDK.[F]	2xTMT6plex [N-Term; K14]; 1xPhospho [S8(100)]	PBANKA_061040 1xPhospho [S1032(100)]	1	4	PBANKA_061040	ATPase, putative	PBANKA_061040 [1025-1038]	0	2137.05	S8(Phospho): 100	67.3	108.8	91.1	135.2	106.6	124.3	124	42.7	7.5	12.1	10.2	15.1	11.9	13.9	13.8	4.8	4.1	7.4	6.6	10.6	11.9	12	13.4	3.7	1	1	1	1	1	1	1	1	2.46371	High	-1.89092	5.957e-05	0.0003968	35.2	-1.89092
[R].GVDQNTNASELSYIR.[D]	1xTMT6plex [N-Term]; 2xPhospho [Y/T/S]	PBANKA_143810 2xPhospho [S140(92.6); S/Y/T]	1	2	PBANKA_143810	nucleus export protein BRR6, putative	PBANKA_143810 [132-146]	0	2055.9		77.9	86	65.5	133.2	148.9	114.8	102.5	71.2	5.5	6.1	4.6	9.4	10.5	8.1	7.2	5	3	3.7	3	6.6	10.5	7	7	3.9	1	1	1	1	1	1	1	1	2.58449	High	2.74034	5.957e-05	0.0002569	66.8	2.74034
[K].ESTLHLVLR.[L]	1xTMT6plex [N-Term]		12	2	PBANKA_114170	ubiquitin-60S ribosomal protein L40, putative	PBANKA_114170 [64-72]	0	1296.78		128.9	217.8	74.3	94.5	38.2	90.7	62.3	93.2	6.4	10.8	3.7	4.7	1.9	4.5	3.1	4.6	3.5	6.6	2.4	3.3	1.9	3.9	3	3.6	1	1	1	1	1	1	1	1	1.87413	High	-0.805112	0.0007888	0.0045	12.98	-0.805112
[R].NTTSNYNNVPDIIGK.[N]	2xTMT6plex [N-Term; K15]; 1xPhospho [T/S/Y]	PBANKA_020760 1xPhospho [S/T]	1	3	PBANKA_020760	asparagine-rich antigen, putative	PBANKA_020760 [306-320]	0	2188.11			81.9	48.7	66.3	53.2	169.3	177	203.5		4.9	2.9	4	3.2	10.2	10.6	12.2		3	1.9	2.8	3.2	8.8	10.3	9.5		1	1	1	1	1	1	1	1.3982	Medium	-0.891654	0.0164	0.1627	26.87	-0.891654
[K].NNTYNLLDSSTNSSASPR.[I]	1xTMT6plex [N-Term]; 2xPhospho [S/Y/T]	PBANKA_141790 2xPhospho [S160(78); S/T/Y]	1	4	PBANKA_141790	conserved Plasmodium protein, unknown function	PBANKA_141790 [152-169]	0	2329.99		116.5	78.3	38.1	161	137.8	75.6	113.1	79.6	6.6	4.4	2.2	9.1	7.8	4.3	6.4	4.5	3.6	2.7	1.4	6.4	7.8	3.7	6.2	3.5	1	1	1	1	1	1	1	1	2.2489	High	0.599576	0.0001087	0.0006118	38.01	0.599576
[K].EITESEEEAQDGEK.[K]	2xTMT6plex [N-Term; K14]; 1xPhospho [T3(100)]	PBANKA_080570 1xPhospho [T218(100)]	1	11	PBANKA_080570	heat shock protein 90, putative (HSP90)	PBANKA_080570 [216-229]	0	2131.97		84.4	104.7	92.6	166.5	89.5	98.7	105.1	58.5	222.3	275.7	244	438.7	235.8	260.1	276.9	154.1	121.4	168.1	158.4	308.1	235.8	224.9	268.2	119.7	6	6	6	6	6	6	6	6	4.59662	High	0.397095	0	1.931e-05	56.93	0.397095
[K].YATDINNYTSNGSDNENYDENENIR.[N]	1xTMT6plex [N-Term]; 1xPhospho [T/S/Y]; 2xDeamidated [N11; N]		1	13	PBANKA_072160	conserved Plasmodium protein, unknown function	PBANKA_072160 [284-308]	0	3236.3		66.8	74.7	56.1	113.1	134.1	129.4	90.1	135.8	5.1	5.7	4.3	8.7	10.3	9.9	6.9	10.4	2.8	3.5	2.8	6.1	10.3	8.6	6.7	8.1	1	1	1	1	1	1	1	1	2.27507	High	1.97244	0.0001929	0.001003	39.62	1.97244
[K].NNSDHNDNANEKNDEDGEMEK.[T]	3xTMT6plex [N-Term; K12; K21]; 1xDeamidated [N]; 1xOxidation [M19]		1	4	PBANKA_143160	serpentine receptor, putative (SR10)	PBANKA_143160 [101-121]	1	3123.4		47.6	94.2	65.3	79.8	145	117	124.3	126.8	3.5	6.9	4.8	5.8	10.6	8.6	9.1	9.3	1.9	4.2	3.1	4.1	10.6	7.4	8.8	7.2	1	1	1	1	1	1	1	1	1.86241	High	0.48862	0.0006943	0.003709	32.85	0.48862
[R].DVNELENSEFSK.[L]	2xTMT6plex [N-Term; K12]; 1xPhospho [S8(88.6)]	PBANKA_010820 1xPhospho [S1344(88.6)]	1	2	PBANKA_010820	conserved Plasmodium protein, unknown function	PBANKA_010820 [1337-1348]	0	1948.93		76.7	148.5	60.4	61.6	114.9	109.4	110.2	118.3	5.7	11	4.5	4.6	8.5	8.1	8.2	8.8	3.1	6.7	2.9	3.2	8.5	7	7.9	6.8	1	1	1	1	1	1	1	1	1.68724	High	0.809497	0.002742	0.02351	26.78	0.809497
[K].ETENPEQNNVSVENFQNEQDEHINNYNNSPK.[K]	2xTMT6plex [N-Term; K31]; 1xDeamidated [N/Q]; 1xPhospho [S29(80.8)]	PBANKA_061080 1xPhospho [S199(95.4)]	1	14	PBANKA_061080	eukaryotic initiation factor 2a, putative	PBANKA_061080 [189-219]	0	4213.86	S11(Phospho): 95.4	46.6	151.3	115.9	96.6	112.4	116.4	111.6	49.1	4.4	14.3	10.9	9.1	10.6	11	10.5	4.6	2.4	8.7	7.1	6.4	10.6	9.5	10.2	3.6	1	1	1	1	1	1	1	1	2.51767	High	-0.221331	0.001735	0.01363	31.26	7.17699
[R].TPQESNADDFIVIQDSPIK.[C]	2xTMT6plex [N-Term; K19]; 2xPhospho [T1(100); S16(100)]	PBANKA_135630 2xPhospho [T694(100); S709(100)]	1	2	PBANKA_135630	conserved Plasmodium protein, unknown function	PBANKA_135630 [694-712]	0	2735.3	T1(Phospho): 100; S16(Phospho): 100	38.7	79	114.8	155.9	104.2	105.3	124	78.1	5.9	12	17.4	23.6	15.8	16	18.8	11.8	3.2	7.3	11.3	16.6	15.8	13.8	18.2	9.2	1	1	1	1	1	1	1	1	4.41877	High	3.17645	0	1.876e-05	29.7	3.17645
[K].NHEQTENSEIEKEHEESIQDKDDNTNK.[K]	4xTMT6plex [N-Term; K12; K21; K27]; 2xPhospho [T/S]; 1xDeamidated [N/Q]	PBANKA_010870 2xPhospho [S464(98.6); T/S]	1	14	PBANKA_010870	conserved Plasmodium protein, unknown function	PBANKA_010870 [448-474]	2	4317.98		73.9	96.5	81.6	140.7	94.9	108.3	115.1	89	41.6	54.3	45.9	79.2	53.4	60.9	64.7	50.1	22.7	33.1	29.8	55.6	53.4	52.7	62.7	38.9	2	2	2	2	2	2	2	2	6.00033	High	7.58493	0	2.097e-06	50.12	6.87817
[K].NQSNPNNSNNINNNAVSQQR.[N]	1xTMT6plex [N-Term]; 1xDeamidated [N/Q]		1	18	PBANKA_145210	conserved Plasmodium protein, unknown function	PBANKA_145210 [265-284]	0	2457.17		63.6	67.1	56.7	116.4	79.7	148.9	78.1	189.5	3.1	3.3	2.8	5.7	3.9	7.3	3.8	9.3	1.7	2	1.8	4	3.9	6.3	3.7	7.2	1	1	1	1	1	1	1	1	2.20156	High	5.28945	0	6.129e-05	53.99	5.28945
[K].NDEETDEKK.[H]	3xTMT6plex [N-Term; K8; K9]; 1xPhospho [T5(100)]	PBANKA_135930 1xPhospho [T2191(100)]	1	1	PBANKA_135930	conserved Plasmodium protein, unknown function	PBANKA_135930 [2187-2195]	1	1874.94	T5(Phospho): 100	86.2	112.3	91.1	157.4	95.6	95.6	112.9	48.9	64.8	84.5	68.5	118.5	71.9	71.9	85	36.8	35.4	51.5	44.5	83.2	71.9	62.2	82.3	28.6	1	1	1	1	1	1	1	1	2.5889	High	1.0683	0.001882	0.01495
[K].EVDNTNQSDNQK.[K]	2xTMT6plex [N-Term; K12]; 1xPhospho [T/S]; 1xDeamidated [N6]	PBANKA_060480 1xPhospho [S521(98.9)]	1	2	PBANKA_060480	eukaryotic translation initiation factor 3 subunit 8, putative	PBANKA_060480 [514-525]	0	1930.88		92.6	113.8	81.9	152.3	91.6	99.2	76	92.7	35	43	31	57.5	34.6	37.5	28.7	35	19.1	26.2	20.1	40.4	34.6	32.4	27.8	27.2	1	1	1	1	1	1	1	1	2.61516	High	1.04258	5.957e-05	0.0003548	21.74	1.04258
[K].STQNKSPIQNNDVIEEINVNNNYGDDNR.[E]	2xTMT6plex [N-Term; K5]; 1xPhospho [S6(92.9)]	PBANKA_082980 1xPhospho [S93(92.9)]	1	4	PBANKA_082980	transcription initiation factor TFIID subunit 7, putative (TAF7)	PBANKA_082980 [88-115]	1	3742.77	S6(Phospho): 92.88	82.5	145.7	77.4	97.6	96	129.1	95.1	76.5	12.6	22.3	11.9	15	14.7	19.8	14.6	11.7	6.9	13.6	7.7	10.5	14.7	17.1	14.1	9.1	1	1	1	1	1	1	1	1	5.05824	High	1.20867	0	2.189e-07	33.46	1.20867
[R].NMGNSENAEHAENNEDSADNLSIQMDANEK.[Q]	2xTMT6plex [N-Term; K30]; 3xPhospho [S5; S17; S22]; 2xDeamidated [N]; 2xOxidation [M2; M25]	PBANKA_050730 3xPhospho [S4239; S4251; S4256]	1	3	PBANKA_050730	dynein heavy chain, putative	PBANKA_050730 [4235-4264]	0	4023.52		42.5	93.3	76.1	87.4	155	153.2	87.4	105.1	5.7	12.5	10.2	11.7	20.7	20.5	11.7	14	3.1	7.6	6.6	8.2	20.7	17.7	11.3	10.9	1	2	2	2	2	2	2	2						32.89	1.14314
[K].DDNNENNNSINNSDTMSSGSYRDVDIYKR.[N]	2xTMT6plex [N-Term; K28]; 1xOxidation [M16]; 2xPhospho [Y/S/T]		1	1	PBANKA_092540	dynein heavy chain, putative	PBANKA_092540 [1825-1853]	2	3971.68	S9(Phospho): 24.63; S13(Phospho): 24.63; T15(Phospho): 24.63; S17(Phospho): 24.63; Y21(Phospho): 55.51	85.8	80.8	62.9	143.6	111.7	55.5	119	140.7	7.1	6.7	5.2	12	9.3	4.6	9.9	11.7	3.9	4.1	3.4	8.4	9.3	4	9.6	9.1	1	1	1	1	1	1	1	1	1.88461	High	2.79344	0.001779	0.01382
[K].ENNSGGNNNELKSVFVVYCHGSTHSSIYEK.[I]	3xTMT6plex [N-Term; K12; K30]; 1xDeamidated [N9]; 1xCarbamidomethyl [C19]; 2xPhospho [S/T/Y]		1	1	PBANKA_122380	vacuolar proton translocating ATPase subunit A, putative	PBANKA_122380 [249-278]	1	4218.94	S22(Phospho): 43.58; T23(Phospho): 30.07; S25(Phospho): 30.07; S26(Phospho): 30.07; Y28(Phospho): 30.07	63.5	102.3	86.8	125.9	122.2	140.3	83.2	75.9	7.3	11.8	10	14.5	14.1	16.2	9.6	8.8	4	7.2	6.5	10.2	14.1	14	9.3	6.8	1	1	1	1	1	1	1	1	1.69115	High	2.8218	0.009454	0.08266
[R].SGSGENAVVSGSSVDDNDDDDIDQIASGQSENAQEK.[N]	2xTMT6plex [N-Term; K36]; 1xDeamidated [Q/N]		1	7	PBANKA_083100	merozoite surface protein 1 (MSP1)	PBANKA_083100 [1387-1422]	0	4098.84		54.7	111.2	84.5	101.1	113	90.5	122.5	122.6	6.8	13.8	10.5	12.5	14	11.2	15.2	15.2	3.7	8.4	6.8	8.8	14	9.7	14.7	11.8	1	1	1	1	1	1	1	1	2.46999	High	0.516983	0	2.46e-05	28.77	0.516983
[K].QISNTLISNDSK.[N]	2xTMT6plex [N-Term; K12]; 1xPhospho [S3(99.1)]	PBANKA_100280 1xPhospho [S648(99.1)]	1	2	PBANKA_100280	protein transport protein Sec24B, putative (SEC24B)	PBANKA_100280 [646-657]	0	1857.97		100	176.8	94.8	119.6	73.5	74.4	78	82.9	14.3	25.3	13.6	17.1	10.5	10.6	11.2	11.8	7.8	15.4	8.8	12	10.5	9.2	10.8	9.2	1	1	1	1	1	1	1	1	1.80625	High	-1.21841	0.0008711	0.006195	34.59	-1.21841
[K].MISTMSNLLVVDEGFDTK.[Y]	2xTMT6plex [N-Term; K18]; 1xDeamidated [N7]; 1xOxidation [M]; 1xPhospho [S/T]		1	3	PBANKA_111520	conserved Plasmodium protein, unknown function	PBANKA_111520 [1012-1029]	0	2555.24	S3(Phospho): 48.89; T4(Phospho): 48.89	93.2	107.6	81.8	158.3	94.6	94.6	109.7	60.2	24.7	28.5	21.7	42	25.1	25.1	29.1	16	13.5	17.4	14.1	29.5	25.1	21.7	28.2	12.4	1	1	1	1	1	1	1	1	2.53646	High	2.0192	0.006037	0.05441
[K].MVSAENFPENR.[S]	1xTMT6plex [N-Term]; 1xOxidation [M1]; 1xPhospho [S3(100)]	PBANKA_140620 1xPhospho [S672(100)]	1	4	PBANKA_140620	conserved Plasmodium protein, unknown function	PBANKA_140620 [670-680]	0	1618.71	S3(Phospho): 100	92.1	119.7	81.4	143.6	92.9	87	90.6	92.8	28.8	37.4	25.4	44.9	29	27.2	28.3	29	15.7	22.8	16.5	31.5	29	23.5	27.4	22.5	2	2	2	2	2	2	2	2	3.09031	High	1.97541	0.0002581	0.001158	44.75	1.97541
[K].EDSTLENIDNNEDAINSQSTAILK.[K]	2xTMT6plex [N-Term; K24]; 1xDeamidated [Q/N]		1	8	PBANKA_092230	threonine--tRNA ligase, putative (ThrRS)	PBANKA_092230 [719-742]	0	3093.55		112.3	119.3	40.5	112.3	125.3	91.2	111.3	88	12.8	13.6	4.6	12.8	14.3	10.4	12.7	10	7	8.3	3	9	14.3	9	12.3	7.8	1	1	1	1	1	1	1	1	3.03837	High	6.4754	0	1.979e-06	59.86	6.4754
[R].IFFNSHGSDNER.[D]	1xTMT6plex [N-Term]; 1xPhospho [S]	PBANKA_093300 1xPhospho [S16(100)]	1	2	PBANKA_093300	serine/threonine protein kinase, putative (CLK3)	PBANKA_093300 [9-20]	0	1731.77		85.6	95.8	87.2	166.3	110.4	76.3	108.5	69.9	14.7	16.4	14.9	28.5	18.9	13.1	18.6	12	8	10	9.7	20	18.9	11.3	18	9.3	1	1	1	1	1	1	1	1	2.87837	High	-3.22793	0.0004442	0.001919	26.79	-3.22793
[K].ADNSLSHSNMSMNSYGK.[L]	2xTMT6plex [N-Term; K17]; 2xOxidation [M10; M12]; 1xPhospho [S/Y]		1	8	PBANKA_143140	conserved Plasmodium protein, unknown function	PBANKA_143140 [454-470]	0	2413.06	S8(Phospho): 31.59; S11(Phospho): 31.59; S14(Phospho): 31.59	100.6	141.7	96.6	157.4	83.5	71.6	67.8	80.7	98.5	138.8	94.6	154.1	81.8	70.1	66.4	79.1	53.8	84.6	61.4	108.2	81.8	60.6	64.3	61.4	3	3	3	3	3	3	3	3	3.2253	High	-0.326408	0	1.009e-05	41.64	-0.326408
[K].ISSNEDIK.[Q]	2xTMT6plex [N-Term; K8]; 1xPhospho [S3(99.6)]	PBANKA_135830 1xPhospho [S923(99.6)]	1	1	PBANKA_135830	conserved Plasmodium protein, unknown function	PBANKA_135830 [921-928]	0	1443.75	S3(Phospho): 99.55	111.1	174.2	107.5	157	28.7	30.5	31.5	159.5	235.2	368.9	227.6	332.5	60.7	64.6	66.7	337.9	128.4	224.9	147.8	233.5	60.7	55.9	64.6	262.4	1	1	1	1	1	1	1	1	2.95048	High	2.56023	0.009365	0.08186
[K].YQQNSFNSSHDNMNISQNNATGQSK.[Y]	2xTMT6plex [N-Term; K25]; 1xDeamidated [N/Q]; 1xOxidation [M13]		1	3	PBANKA_090360	dynamin-like protein, putative (DYN1)	PBANKA_090360 [541-565]	0	3289.52		67.8	120.3	80.4	105.3	85.9	102.4	93.4	144.6	10.3	18.2	12.2	15.9	13	15.5	14.1	21.9	5.6	11.1	7.9	11.2	13	13.4	13.7	17	1	1	1	1	1	1	1	1	2.20226	Medium	-0.0156431	0.01201	0.118	34.4	-0.0156431
[R].YYSFNSNGESEK.[V]	2xTMT6plex [N-Term; K12]; 1xPhospho [S/Y]; 1xDeamidated [N]	PBANKA_040620 1xPhospho [S1273(97.7)]	1	14	PBANKA_040620	conserved Plasmodium protein, unknown function	PBANKA_040620 [1268-1279]	0	1963.87		114.6	165.3	92.2	148	74.4	74	68.4	63.1	150.7	217.3	121.2	194.6	97.8	97.4	89.9	83	82.3	132.5	78.7	136.7	97.8	84.2	87.1	64.5	6	6	6	6	6	6	6	6	3.10094	High	-4.51756	0.0004442	0.001919	34.36	0.330764
[K].NQNENQNENQNENQNENENKNENK.[N]	3xTMT6plex [N-Term; K20; K24]; 2xDeamidated [Q/N]		1	2	PBANKA_031170	rhoptry neck protein 6, putative (RON6)	PBANKA_031170 [264-287]	1	3619.67		68.2	156.9	139.6	157.7	108.7	68.7	66.5	33.7	6.8	15.6	13.9	15.7	10.8	6.8	6.6	3.3	3.7	9.5	9	11	10.8	5.9	6.4	2.6	1	1	1	1	1	1	1	1	3.36946	High	4.85207	0.0003512	0.001652	41.37	4.85207
[K].KNYNNSDEEQEDNEQIINATYNNEN.[-]	2xTMT6plex [N-Term; K1]; 1xDeamidated [Q10]; 1xPhospho [Y/S/T]	PBANKA_010950 1xPhospho [S260(83.6)]	1	1	PBANKA_010950	transcription factor with AP2 domain(s), putative (ApiAP2)	PBANKA_010950 [255-279]	1	3541.53	S6(Phospho): 83.62	71.6	57.2	60.2	142.9	146.8	118.5	98.2	104.7	6.8	5.4	5.7	13.5	13.9	11.2	9.3	9.9	3.7	3.3	3.7	9.5	13.9	9.7	9	7.7	1	1	1	1	1	1	1	1	4.20142	High	2.11709	0.0007106	0.00419	29.02	2.11709
[K].DHDNNSDINK.[E]	2xTMT6plex [N-Term; K10]; 1xPhospho [S6(100)]	PBANKA_132140 1xPhospho [S722(100)]	1	2	PBANKA_132140	large ribosomal subunit nuclear export factor, putative (UIS20)	PBANKA_132140 [717-726]	0	1709.79	S6(Phospho): 100	89.6	109.2	93.1	166.9	89.4	92.3	99.1	60.4	57	69.4	59.1	106.1	56.8	58.6	63	38.4	31.1	42.3	38.4	74.5	56.8	50.7	61	29.8	1	1	1	1	1	1	1	1	4.37702	High	0.518263	0	1.819e-05	40.82	0.518263
[K].NVVFINEIDSYDNESDEKENSVEGNISEMK.[Y]	3xTMT6plex [N-Term; K18; K30]; 1xPhospho [S/Y]; 1xDeamidated [N]; 1xOxidation [M29]		1	14	PBANKA_143620	histone-lysine N-methyltransferase, H3 lysine-4 specific, putative (SET10)	PBANKA_143620 [889-918]	1	4231.97		77	73.7	55.8	127.9	110.1	67	139.2	149.3	5.3	5.1	3.9	8.8	7.6	4.6	9.6	10.3	2.9	3.1	2.5	6.2	7.6	4	9.3	8	1	1	1	1	1	1	1	1	1.76674	High	2.70672	0.0006943	0.003606	27.74	2.70672
[R].TNSNQLYDLPTQGPNINVQR.[T]	1xTMT6plex [N-Term]; 1xPhospho [S/T/Y]		1	6	PBANKA_031190	RING zinc finger protein, putative	PBANKA_031190 [34-53]	0	2581.26	S3(Phospho): 98.61	113	109.6	30.5	107.7	83	135.9	103.9	116.3	15.4	14.9	4.2	14.7	11.3	18.5	14.1	15.8	8.4	9.1	2.7	10.3	11.3	16	13.7	12.3	1	1	1	1	1	1	1	1	5.51644	High	-2.22742	0	6.597e-07	56.3	-2.22742
[K].SKLELNPEGNAENNQTNENQDTNNEESEIK.[Y]	3xTMT6plex [N-Term; K2; K30]; 1xPhospho [T/S]; 2xDeamidated [N/Q]		1	29	PBANKA_111860	cell division cycle protein 48 homologue, putative	PBANKA_111860 [713-742]	1	4171.94	T16(Phospho): 49.26; T22(Phospho): 49.26	47.8	122.2	98.7	98.7	108	109.4	126.9	88.3	6.4	16.4	13.2	13.2	14.5	14.7	17	11.8	3.5	10	8.6	9.3	14.5	12.7	16.5	9.2	1	1	1	1	1	1	1	1	4.03085	High	5.11585	0	9.856e-08	65.82	3.52441
[K].NENEVIKNEEDAVGNDDEVYSNEE.[-]	2xTMT6plex [N-Term; K7]; 1xPhospho [S21(97.6)]	PBANKA_103890 1xPhospho [S1791(97.6)]	1	5	PBANKA_103890	conserved Plasmodium protein, unknown function	PBANKA_103890 [1771-1794]	1	3292.44	S21(Phospho): 97.65	73	102.6	77.6	124.9	100.8	114.6	118.4	88.1	17.4	24.4	18.5	29.8	24	27.3	28.2	21	9.5	14.9	12	20.9	24	23.6	27.3	16.3	2	2	2	2	2	2	2	2	3.01287	High	-0.58964	5.957e-05	0.0001972	36.33	-0.58964
[K].VESDDPNEVDVYDINK.[D]	2xTMT6plex [N-Term; K16]; 1xPhospho [S3(100)]	PBANKA_082080 1xPhospho [S905(100)]	1	2	PBANKA_082080	regulator of chromosome condensation, putative	PBANKA_082080 [903-918]	0	2389.12	S3(Phospho): 100	78.4	113.7	95.5	148.4	122.3	97.1	116.4	28.3	13.9	20.2	16.9	26.3	21.7	17.2	20.7	5	7.6	12.3	11	18.5	21.7	14.9	20	3.9	1	1	1	1	1	1	1	1	4.11421	High	1.56338	0	3.354e-05	45.24	1.56338
[K].GASFENMDEAEFDSSA.[-]	1xTMT6plex [N-Term]; 1xDeamidated [N6]; 1xOxidation [M7]; 1xPhospho [S15(98)]	PBANKA_103820 1xPhospho [S1593(83.7)]	1	2	PBANKA_103820	nuclear formin-like protein (MISFIT)	PBANKA_103820 [1579-1594]	0	2032.76	S15(Phospho): 83.68	89.2	57.7	56.3	161.9	51.4	145.5	109	128.9	6.6	4.3	4.2	12	3.8	10.8	8.1	9.5	3.6	2.6	2.7	8.4	3.8	9.3	7.8	7.4	1	1	1	1	1	1	1	1	1.95362	High	5.96488	0.001573	0.01186	29.15	8.79392
[K].NENDDNHIKDNQSNEENNEGNISTSSNR.[D]	2xTMT6plex [N-Term; K9]; 3xPhospho [S13(96.8); T/S]	PBANKA_070450 3xPhospho [S6504(96.8); S/T]	1	2	PBANKA_070450	E3 ubiquitin-protein ligase, putative	PBANKA_070450 [6492-6519]	1	3886.56		136.4	108.4	61	191.5	48	91.7	104.2	58.8	11.4	9	5.1	15.9	4	7.6	8.7	4.9	6.2	5.5	3.3	11.2	4	6.6	8.4	3.8	1	1	1	1	1	1	1	1	3.07945	High	1.1391	0.0001087	0.0006028	14.89	1.1391
[K].INLPSSQPDNTNPAASSSSSVK.[N]	2xTMT6plex [N-Term; K22]; 2xPhospho [S20(82.2); S/T]	PBANKA_093960 2xPhospho [S1633(82.2); S/T]	1	9	PBANKA_093960	polyadenylate-binding protein-interacting protein 1, putative (PAIP1)	PBANKA_093960 [1614-1635]	0	2819.33		69.9	88.1	81.9	140.9	106.3	100.5	119.8	92.6	23.8	30	27.9	48	36.2	34.2	40.8	31.5	13	18.3	18.1	33.7	36.2	29.6	39.5	24.5	3	3	3	3	3	3	3	3	2.65242	High	-5.47647	0.001396	0.01077	53.12	0.498607
[M].SDHETYDNIDAGASQTYPVQAGAIK.[K]	1xPhospho [S1]; 1xTMT6plex [K25]; 1xAcetyl [N-Term]; 3xDeamidated [N8; Q15; Q20]	PBANKA_060320 1xPhospho [S2]; 1xAcetyl [N-Term]	1	1	PBANKA_060320	eukaryotic translation initiation factor 5A, putative (EIF5A)	PBANKA_060320 [2-26]	0	3005.31		29.3	71.1	131.8	173.8	116.4	100.3	73	104.3	2.6	6.2	11.6	15.2	10.2	8.8	6.4	9.1	1.4	3.8	7.5	10.7	10.2	7.6	6.2	7.1	1	1	1	1	1	1	1	1						40.83	12.4975
[K].MNEISYNEDEQLILTDSTK.[V]	2xTMT6plex [N-Term; K19]; 1xPhospho [T/S/Y]; 2xDeamidated [N7; Q11]; 1xOxidation [M1]		1	2	PBANKA_050730	dynein heavy chain, putative	PBANKA_050730 [1223-1241]	0	2799.29		87.4	128.1	76.9	117.4	54.2	70.2	156.8	108.9	4	5.9	3.5	5.4	2.5	3.2	7.2	5	2.2	3.6	2.3	3.8	2.5	2.8	7	3.9	1	1	1	1	1	1	1	1	1.82206	High	14.4436	0.009558	0.08427	38.15	14.4436
[R].SQYTNENDNSTQSHNK.[I]	2xTMT6plex [N-Term; K16]		1	6	PBANKA_040110	serine/threonine protein kinase, putative (SRPK1)	PBANKA_040110 [1131-1146]	0	2325.11		28.4	91.1	106.7	113.1	115.8	95.3	115.9	133.8	4.8	15.3	17.9	18.9	19.4	16	19.4	22.4	2.6	9.3	11.6	13.3	19.4	13.8	18.8	17.4	1	2	2	2	2	2	2	2	2.92858	High	0.473005	0	5.714e-06	56.31	0.473005
[R].RNNDFEEFENEEESEDEKIK.[E]	3xTMT6plex [N-Term; K18; K20]; 1xPhospho [S14(100)]	PBANKA_110460 1xPhospho [S285(100)]	1	2	PBANKA_110460	conserved Plasmodium protein, unknown function	PBANKA_110460 [272-291]	2	3297.54	S14(Phospho): 100	80.8	117.3	93.8	145.5	105.8	88.4	100	68.4	19.8	28.7	22.9	35.6	25.9	21.6	24.5	16.7	10.8	17.5	14.9	25	25.9	18.7	23.7	13	1	1	1	1	1	1	1	1	2.87811	High	1.80378	0.0003692	0.001738	19.4	1.80378
[K].TNIASTQSNEISYLER.[N]	1xTMT6plex [N-Term]		1	2	PBANKA_146300	osmiophilic body protein (G377)	PBANKA_146300 [1340-1355]	0	2055.06		43.3	103.4	93.5	103.2	95.4	134	123.7	103.5	5.5	13.1	11.9	13.1	12.1	17	15.7	13.1	3	8	7.7	9.2	12.1	14.7	15.2	10.2	1	1	1	1	1	1	1	1	3.27676	High	0.295922	0	1.631e-06	43.68	0.295922
[K].QTYDYLTVDHNYNNYSQNEELDR.[I]	1xTMT6plex [N-Term]; 1xPhospho [Y/S/T]		1	6	PBANKA_145460	conserved Plasmodium protein, unknown function	PBANKA_145460 [1950-1972]	0	3203.38	Y12(Phospho): 33.05; Y15(Phospho): 33.05; S16(Phospho): 33.05	74.4	53.3	80.1	178.1	126.7	124	117.4	46	4.6	3.3	4.9	11	7.8	7.6	7.2	2.8	2.5	2	3.2	7.7	7.8	6.6	7	2.2	1	1	1	1	1	1	1	1	1.90397	High	1.6	0.0004782	0.002139	35.13	1.6
[K].KNNNNNEDVENDDSIEFYLMHGFSDDER.[N]	2xTMT6plex [N-Term; K1]; 1xPhospho [Y/S]; 1xDeamidated [N]; 1xOxidation [M20]	PBANKA_136530 1xPhospho [S535(99.9)]	1	3	PBANKA_136530	conserved Plasmodium protein, unknown function	PBANKA_136530 [512-539]	1	3915.67		72.6	65	71.6	149.8	103.8	129.6	156.6	51	5.3	4.8	5.2	11	7.6	9.5	11.5	3.7	2.9	2.9	3.4	7.7	7.6	8.2	11.1	2.9	1	1	1	1	1	1	1	1	3.44526	High	6.42846	0.003214	0.02668	71.31	6.42846
[K].NEEEDNEQISESDNELQIEK.[E]	2xTMT6plex [N-Term; K20]; 1xPhospho [S]		1	4	PBANKA_110460	conserved Plasmodium protein, unknown function	PBANKA_110460 [613-632]	0	2930.32	S10(Phospho): 50; S12(Phospho): 50	69.8	113.4	71	97.8	88.8	83.3	67.5	208.2	16.7	27.1	16.9	23.4	21.2	19.9	16.1	49.7	9.1	16.5	11	16.4	21.2	17.2	15.6	38.6	1	1	1	1	1	1	1	1	2.8811	High	-4.63586	3.638e-05	0.0001467	38.57	-4.63586
[K].IEDSDNTNK.[E]	2xTMT6plex [N-Term; K9]; 1xPhospho [S4(100)]	PBANKA_091020 1xPhospho [S272(100)]	1	3	PBANKA_091020	protein phosphatase 2C, putative	PBANKA_091020 [269-277]	0	1573.75		77.7	92.8	92.3	162.5	91.9	112.6	117.2	52.9	119.8	143	142.3	250.5	141.6	173.6	180.6	81.5	65.4	87.2	92.4	175.9	141.6	150.1	174.9	63.3	2	2	2	2	2	2	2	2	2.87766	High	0.259776	0.0008514	0.005643	30.36	0.755414
[-].MNISNMSEQSEQGSLNNSNISISENK.[N]	1xTMT6plex [K26]; 1xAcetyl [N-Term]; 2xOxidation [M1; M6]	PBANKA_060420 1xAcetyl [N-Term]	1	1	PBANKA_060420	zinc finger protein, putative	PBANKA_060420 [1-26]	0	3158.44		75.5	76.1	55.6	121.1	131.5	79	125.1	136.1	5.9	5.9	4.3	9.4	10.2	6.1	9.7	10.6	3.2	3.6	2.8	6.6	10.2	5.3	9.4	8.2	1	1	1	1	1	1	1	1						39.56	-0.352593
[K].SDSNSYSQHK.[S]	2xTMT6plex [N-Term; K10]; 1xPhospho [S1(90.6)]		1	3	PBANKA_123710	conserved Plasmodium protein, unknown function	PBANKA_123710 [4261-4270]	0	1690.78	S1(Phospho): 47.24; S3(Phospho): 47.24	93.6	130.8	78.1	126.5	77.6	91.2	86.8	115.5	21.6	30.2	18	29.2	17.9	21	20	26.7	11.8	18.4	11.7	20.5	17.9	18.2	19.4	20.7	1	1	1	1	1	1	1	1	2.40118	High	-0.658126	0.002742	0.02408	32.18	-0.441534
[K].ENDDGEGGQENLNENENMNDSNK.[I]	2xTMT6plex [N-Term; K23]; 1xOxidation [M18]		1	5	PBANKA_093890	IWS1-like protein, putative	PBANKA_093890 [60-82]	0	3040.31		78.2	97.2	54.1	101.5	95.4	93.5	101.1	179.1	15.6	19.4	10.8	20.2	19	18.6	20.1	35.7	8.5	11.8	7	14.2	19	16.1	19.5	27.7	2	2	2	2	2	2	2	2	2.86536	High	-0.564405	0	5.781e-06	63.98	-0.564405
[K].INENNTTVK.[F]	2xTMT6plex [N-Term; K9]; 1xPhospho [T7(99.1)]	PBANKA_136160 1xPhospho [T101(99.1)]	1	5	PBANKA_136160	E1-E2 ATPase, putative	PBANKA_136160 [95-103]	0	1570.82	T7(Phospho): 99.14	87.7	114.6	90.2	152.2	104.6	103	87.1	60.5	107.7	140.7	110.7	186.8	128.4	126.5	107	74.3	58.8	85.8	71.9	131.2	128.4	109.4	103.6	57.7	2	2	2	2	2	2	2	2	2.66693	High	-0.205203	0.0007263	0.004251	27.69	-0.205203
[K].DDESIKDQESVDEK.[R]	3xTMT6plex [N-Term; K6; K14]; 1xPhospho [S]		1	3	PBANKA_113820	RuvB-like helicase 3, putative (RUVB3)	PBANKA_113820 [455-468]	1	2404.17		84.5	100.4	88.9	159.7	99.8	107	103.8	55.9	127.8	151.7	134.5	241.5	150.9	161.8	157	84.5	69.8	92.5	87.3	169.6	150.9	139.9	152	65.6	2	2	2	2	2	2	2	2	3.17827	High	-0.253825	0.001171	0.008729	15.98	2.10718
[K].GNNSDNAGTSGNGFNMTTPTSYQISNNSSENDSK.[N]	2xTMT6plex [N-Term; K34]; 2xDeamidated [N/Q]; 1xOxidation [M16]		1	9	PBANKA_141440	exportin-1, putative	PBANKA_141440 [872-905]	0	3986.75		71.5	87.9	61.9	112	91.5	114.5	102.3	158.3	12.3	15.1	10.6	19.2	15.7	19.7	17.6	27.2	6.7	9.2	6.9	13.5	15.7	17	17	21.1	2	2	2	2	2	2	2	2	2.74375	High	0.291905	0	4.771e-06	42.53	0.904285
[R].INNEMNNDNEHNK.[N]	2xTMT6plex [N-Term; K13]; 1xDeamidated [N]; 1xOxidation [M5]		1	3	PBANKA_112910	DNA polymerase epsilon, catalytic subunit a, putative	PBANKA_112910 [2219-2231]	0	2060.97		57.8	169.6	130.7	111.6	103.4	81.8	93.3	51.8	5.3	15.6	12	10.3	9.5	7.5	8.6	4.8	2.9	9.5	7.8	7.2	9.5	6.5	8.3	3.7	1	1	1	1	1	1	1	1	1.07892	High	0.940131	0.009558	0.08435
[K].SYISSENK.[H]	2xTMT6plex [N-Term; K8]; 1xPhospho [S4(100)]	PBANKA_091260 1xPhospho [S531(100)]	1	2	PBANKA_091260	conserved Plasmodium protein, unknown function	PBANKA_091260 [528-535]	0	1465.73	S4(Phospho): 99.96	102.3	150	92.6	141.7	76.7	83.9	79.9	73	117.4	172.2	106.3	162.6	88	96.3	91.7	83.8	64.1	105	69	114.2	88	83.3	88.8	65.1	1	1	1	1	1	1	1	1	2.72689	High	1.87267	0.00274	0.02338	23.78	1.87267
[K].HMSEDECSQYGEKYENCYENIDDEDELR.[N]	2xTMT6plex [N-Term; K13]; 2xPhospho [S3; S/Y]; 1xOxidation [M2]	PBANKA_101490 2xPhospho [S256; Y/S]	1	4	PBANKA_101490	coatamer protein, beta subunit, putative	PBANKA_101490 [254-281]	1	4077.58		122.9	118.7	33.9	115	82.9	71.6	110.5	144.5	11.7	11.3	3.2	11	7.9	6.8	10.5	13.8	6.4	6.9	2.1	7.7	7.9	5.9	10.2	10.7	1	1	1	1	1	1	1	1						34.85	-9.66668
[K].NHYNDSDNNTDANNYSSYNNDPLGDTK.[V]	2xTMT6plex [N-Term; K27]; 1xPhospho [S/T/Y]		1	6	PBANKA_130550	acid cluster protein 33 homologue, putative	PBANKA_130550 [328-354]	0	3600.52	S6(Phospho): 37.4; T10(Phospho): 37.4	60.4	130.1	90.4	96.8	103	97.7	101	120.7	5.9	12.6	8.8	9.4	10	9.5	9.8	11.7	3.2	7.7	5.7	6.6	10	8.2	9.5	9.1	1	1	1	1	1	1	1	1	2.26875	High	1.78084	0.0001742	0.0008876	29.25	1.78084
[K].NNINSGDYLR.[N]	1xTMT6plex [N-Term]; 1xPhospho [S5(100)]	PBANKA_060560 1xPhospho [S263(100)]	1	1	PBANKA_060560	conserved Plasmodium protein, unknown function	PBANKA_060560 [259-268]	0	1474.69	S5(Phospho): 100	100.7	138.7	88.8	144.7	67.9	71.6	84	103.6	66.7	91.9	58.8	95.8	45	47.4	55.7	68.6	36.4	56	38.2	67.3	45	41	53.9	53.3	1	1	1	1	1	1	1	1	2.29233	High	1.32555	0.005766	0.05224	12.64	1.32555
[K].HHGSDNPNGIK.[H]	2xTMT6plex [N-Term; K11]; 1xPhospho [S4(100)]	PBANKA_141780 1xPhospho [S31(100)]	1	2	PBANKA_141780	N2,N2-dimethylguanosine tRNA methyltransferase, putative	PBANKA_141780 [28-38]	0	1713.85	S4(Phospho): 100	109.5	96.6	45.4	136	97.3	115.6	104.2	95.4	12.3	10.8	5.1	15.2	10.9	13	11.7	10.7	6.7	6.6	3.3	10.7	10.9	11.2	11.3	8.3	1	1	1	1	1	1	1	1	2.62267	High	-1.18622	0.0002581	0.001147	31.71	-1.18622
[K].NKDSIVNEMPDEEYVLK.[I]	3xTMT6plex [N-Term; K2; K17]; 1xOxidation [M9]; 1xPhospho [S4(100)]	PBANKA_060120 1xPhospho [S5183(100)]	1	2	PBANKA_060120	dynein heavy chain, putative	PBANKA_060120 [5180-5196]	1	2806.42	S4(Phospho): 100	123.7	144.8	79.2	158.3	78.9	81.2	67	66.9	46	53.8	29.4	58.8	29.3	30.2	24.9	24.8	25.1	32.8	19.1	41.3	29.3	26.1	24.1	19.3	1	1	1	1	1	1	1	1	3.36194	High	-3.86098	5.957e-05	0.0003131	29.65	-3.86098
[K].YNNELSEEHDTTHLIDK.[K]	2xTMT6plex [N-Term; K17]; 1xDeamidated [N]; 1xPhospho [Y/S/T]		1	2	PBANKA_061580	exported serine/threonine protein kinase (EST)	PBANKA_061580 [651-667]	0	2597.22	Y1(Phospho): 71.95	78.3	106.6	71.6	117.5	108.5	101.7	113	102.8	23.3	31.7	21.3	34.9	32.2	30.2	33.6	30.5	12.7	19.3	13.8	24.5	32.2	26.1	32.5	23.7	1	1	1	1	1	1	1	1	2.39734	High	9.93321	0.001384	0.01052
[K].YEHLKDEDNVNNYENVPNYENANNENTDNEK.[L]	3xTMT6plex [N-Term; K5; K31]; 1xDeamidated [N]; 1xPhospho [T27(96.2)]	PBANKA_050920 1xPhospho [T313(94)]	1	22	PBANKA_050920	formin 2, putative	PBANKA_050920 [287-317]	1	4510.02	T27(Phospho): 93.95	111.7	113.6	91.6	189.8	64	93.2	104.2	32	14.8	15.1	12.2	25.2	8.5	12.4	13.8	4.2	8.1	9.2	7.9	17.7	8.5	10.7	13.4	3.3	1	1	1	1	1	1	1	1	5.00098	High	6.30403	5.957e-05	0.0002045	44.66	6.30403
[K].NNAQQSSQQEQNTAENK.[A]	2xTMT6plex [N-Term; K17]		1	15	PBANKA_091440	heat shock protein 70, putative (UIS24)	PBANKA_091440 [639-655]	0	2377.17		78.9	142.8	88.3	106.8	114.9	99.2	103.7	65.4	25.5	46.1	28.5	34.5	37.1	32	33.5	21.1	13.9	28.1	18.5	24.2	37.1	27.7	32.4	16.4	5	5	5	5	5	5	5	4	2.96509	High	1.04619	0	2.449e-05	58.34	1.61671
[R].RSVSAIPHVNNNINR.[R]	1xTMT6plex [N-Term]; 2xPhospho [S2(100); S4(100)]	PBANKA_144300 2xPhospho [S761(100); S763(100)]	1	1	PBANKA_144300	NIMA related kinase 1, putative (NEK1)	PBANKA_144300 [760-774]	1	2080.01	S2(Phospho): 100; S4(Phospho): 100	82.4	113.6	84.9	136.3	90.9	92.3	105.7	93.7	18.7	25.8	19.3	30.9	20.6	20.9	24	21.2	10.2	15.7	12.5	21.7	20.6	18.1	23.2	16.5	1	1	1	1	1	1	1	1	3.04185	High	0.818113	0.0006943	0.00376	10.91	0.818113
[K].ENENDDRNSDGEEKNEEIK.[K]	3xTMT6plex [N-Term; K14; K19]; 1xPhospho [S9(100)]	PBANKA_121200 1xPhospho [S1964(100)]	1	1	PBANKA_121200	conserved Plasmodium protein, unknown function	PBANKA_121200 [1956-1974]	2	3031.41	S9(Phospho): 100	79.6	109.1	94.2	150.2	87.9	93.1	115.7	70.2	65.2	89.4	77.2	123	72	76.3	94.8	57.6	35.6	54.5	50.1	86.4	72	66	91.8	44.7	1	1	1	1	1	1	1	1	3.46905	High	1.98341	0.000962	0.00775
[R].GEDDTDDDEEDEEVYTANNPNDVNAK.[S]	2xTMT6plex [N-Term; K26]; 1xPhospho [T5(100)]	PBANKA_141730 1xPhospho [T605(100)]	1	25	PBANKA_141730	translocation protein SEC63, putative (SEC63)	PBANKA_141730 [601-626]	0	3451.42		77.7	98.5	82.4	140.2	103.3	109.5	107.5	80.8	97.4	123.5	103.4	175.9	129.6	137.4	134.8	101.3	53.2	75.3	67.1	123.5	129.6	118.8	130.5	78.7	7	7	7	7	7	7	7	7	4.30698	High	-3.80035	0	1.759e-05	65.71	-2.4132
[K].LNNNIQLDEEQVSNGR.[N]	1xTMT6plex [N-Term]; 1xPhospho [S13(100)]; 2xDeamidated [Q6; N14]	PBANKA_091030 1xPhospho [S2195(100)]	1	2	PBANKA_091030	guanylyl cyclase, putative (GCalpha)	PBANKA_091030 [2183-2198]	0	2153.99		48.6	101.1	92.3	109.7	101	117.8	111.4	118	5.7	11.8	10.8	12.8	11.8	13.8	13	13.8	3.1	7.2	7	9	11.8	11.9	12.6	10.7	1	1	1	1	1	1	1	1	2.40626	High	9.1942	0.0006378	0.003017	22.09	9.1942
[M].TEEEMIVETGSNTESEFDEQAELLEK.[K]	2xPhospho [T/S]; 1xTMT6plex [K26]; 1xAcetyl [N-Term]; 2xDeamidated [N12; Q20]; 1xOxidation [M5]	PBANKA_060430 2xPhospho [T/S]; 1xAcetyl [N-Term]	1	12	PBANKA_060430	conserved Plasmodium protein, unknown function	PBANKA_060430 [2-27]	0	3436.39		43.3	53.3	38.7	67.3	127	133.2	173.8	163.5	2.9	3.6	2.6	4.6	8.6	9	11.8	11.1	1.6	2.2	1.7	3.2	8.6	7.8	11.4	8.6	1	1	1	1	1	1	1	1						30.12	10.2721
[R].QNQTFNTIPNDVNSNDENELSYNQNR.[N]	1xTMT6plex [N-Term]; 1xDeamidated [N]; 1xPhospho [T7(83.6)]	PBANKA_021220 1xPhospho [T2348(83.6)]	1	8	PBANKA_021220	conserved Plasmodium protein, unknown function	PBANKA_021220 [2342-2367]	0	3378.47	T7(Phospho): 83.55	69.3	80.5	79.9	141.7	117.7	155.6	123	32.5	4.9	5.7	5.7	10.1	8.4	11.1	8.8	2.3	2.7	3.5	3.7	7.1	8.4	9.6	8.5	1.8	1	1	1	1	1	1	1	1	2.24307	High	1.41046	0.0001742	0.0008937	16.5	1.41046
[K].INLSEYNYVINNSDHSDEEEDDDDHHYISDNNYK.[N]	2xTMT6plex [N-Term; K34]; 2xDeamidated [N]; 2xPhospho [Y/S]		1	28	PBANKA_091640	ubiquitin-like protein, putative	PBANKA_091640 [20-53]	0	4735.92	Y8(Phospho): 62.17; S13(Phospho): 66.16	54.2	85	84.7	121.9	116.8	86.8	111.9	138.8	10.3	16.1	16	23.1	22.1	16.4	21.2	26.3	5.6	9.8	10.4	16.2	22.1	14.2	20.5	20.4	2	3	3	3	3	3	3	3	3.04343	High	9.45754	3.638e-05	0.0001531	46.22	9.45754
[K].INTTEQLK.[E]	2xTMT6plex [N-Term; K8]; 1xPhospho [T3(99.3)]	PBANKA_092410 1xPhospho [T339(99.3)]	1	1	PBANKA_092410	conserved Plasmodium protein, unknown function	PBANKA_092410 [337-344]	0	1484.81	T3(Phospho): 99.29	112.7	157.6	100.4	159.8	61.5	80.5	66.4	61.2	152.4	213.1	135.7	216	83.1	108.8	89.7	82.8	83.2	129.9	88.1	151.7	83.1	94.1	86.9	64.3	1	1	1	1	1	1	1	1	2.50525	High	0.552474	0.005006	0.04254	8.43	0.552474
[K].LNFESEKEGEMENDNTDNIIQNEMK.[Q]	3xTMT6plex [N-Term; K7; K25]; 1xPhospho [S/T]; 2xDeamidated [N]; 2xOxidation [M11; M24]	PBANKA_114550 1xPhospho [S/T]	1	6	PBANKA_114550	conserved Plasmodium protein, unknown function	PBANKA_114550 [508-532]	1	3772.71		79.5	120.5	72.6	105.8	111.3	115.7	104.4	90.1	36.8	55.8	33.6	49	51.5	53.5	48.3	41.7	20.1	34	21.8	34.4	51.5	46.3	46.8	32.4	4	4	4	4	4	4	4	4						42.56	10.5869
[R].DADQINSGEK.[E]	2xTMT6plex [N-Term; K10]; 1xPhospho [S7(100)]	PBANKA_135930 1xPhospho [S994(100)]	1	4	PBANKA_135930	conserved Plasmodium protein, unknown function	PBANKA_135930 [988-997]	0	1614.78	S7(Phospho): 100	80.4	96.8	90.9	158	101.4	102.7	118.6	51.2	80	96.3	90.4	157.2	100.9	102.2	118	51	43.7	58.7	58.7	110.4	100.9	88.4	114.3	39.6	1	1	1	1	1	1	1	1	3.30977	High	-0.464239	5.957e-05	0.0003601	28.05	-0.0189915
[R].GYNDPSNLYSGNFNK.[Q]	2xTMT6plex [N-Term; K15]; 1xPhospho [S10(82)]; 1xDeamidated [N7]	PBANKA_040110 1xPhospho [S986(87.3)]	1	2	PBANKA_040110	serine/threonine protein kinase, putative (SRPK1)	PBANKA_040110 [977-991]	0	2229.03	S10(Phospho): 87.33	99.1	144.5	110.8	168	70.2	63.9	58.2	85.2	17.2	25.1	19.3	29.2	12.2	11.1	10.1	14.8	9.4	15.3	12.5	20.5	12.2	9.6	9.8	11.5	1	1	1	1	1	1	1	1	2.40672	High	9.02396	0.001035	0.008392	32.21	9.02396
[K].FDNIEVSSSDDEVK.[K]	2xTMT6plex [N-Term; K14]; 1xPhospho [S]		1	5	PBANKA_131240	conserved Plasmodium protein, unknown function	PBANKA_131240 [10-23]	0	2122		90.7	44.2	46.8	159.5	132	79.3	130	117.4	10.4	5.1	5.4	18.4	15.2	9.1	15	13.5	5.7	3.1	3.5	12.9	15.2	7.9	14.5	10.5	1	1	1	1	1	1	1	1	1.94529	High	3.12086	0.0002581	0.001138	29.59	3.12086
[K].SGGNITVNNSK.[D]	2xTMT6plex [N-Term; K11]; 1xPhospho [S1(100)]	PBANKA_010240 1xPhospho [S931(100)]	1	4	PBANKA_010240	conserved Plasmodium protein, unknown function	PBANKA_010240 [931-941]	0	1628.84		103.7	150.3	109.5	166.6	60.8	61	63.6	84.6	104.8	151.9	110.6	168.3	61.4	61.6	64.2	85.5	57.2	92.6	71.8	118.2	61.4	53.3	62.2	66.4	2	2	2	2	2	2	2	2	3.08858	High	1.75736	0.0003306	0.001583	31.46	2.21528
[K].KNSDINIDYDSSIYR.[N]	2xTMT6plex [N-Term; K1]; 1xPhospho [S3(100)]	PBANKA_020700 1xPhospho [S547(100)]	1	2	PBANKA_020700	calcium-transporting ATPase, putative (SERCA)	PBANKA_020700 [545-559]	1	2341.15		84.8	138.3	87.9	118	86.5	93.1	94.1	97.3	51.3	83.7	53.1	71.3	52.3	56.3	56.9	58.8	28	51	34.5	50.1	52.3	48.7	55.1	45.7	1	1	1	1	1	1	1	1	3.97065	High	-2.6021	8.7e-05	0.0004705	38.82	-2.6021
[R].NDTSTTNNGGANSNNSNGEGQEK.[K]	2xTMT6plex [N-Term; K23]; 2xPhospho [S13; S16]; 3xDeamidated [N/Q]	PBANKA_090690 2xPhospho [S1387; S1390]	1	3	PBANKA_090690	conserved Plasmodium protein, unknown function	PBANKA_090690 [1375-1397]	0	2931.16		26.7	114.8	104	78.8	108.3	137.2	118.1	112	4.4	18.9	17.1	13	17.8	22.5	19.4	18.4	2.4	11.5	11.1	9.1	17.8	19.5	18.8	14.3	1	2	2	2	2	2	2	2						44.54	7.07475
[K].SDGENIQK.[E]	2xTMT6plex [N-Term; K8]; 1xPhospho [S1(100)]	PBANKA_100340 1xPhospho [S1954(100)]	1	2	PBANKA_100340	lysine decarboxylase, putative (UIS14)	PBANKA_100340 [1954-1961]	0	1428.71	S1(Phospho): 100	87.2	102.1	76.4	140.6	108.8	119.3	112.3	53.2	72.7	85.1	63.8	117.3	90.8	99.6	93.7	44.4	39.7	51.9	41.4	82.4	90.8	86.1	90.7	34.5	1	1	1	1	1	1	1	1	2.95379	High	0.470032	0.0006896	0.003176	23.69	0.470032
[R].TNSSLFFSNNDNMSNNNESK.[A]	2xTMT6plex [N-Term; K20]; 2xDeamidated [N]; 1xOxidation [M13]; 1xPhospho [S/T]	PBANKA_145780 1xPhospho [S263(90.1)]	1	85	PBANKA_145780	ADP-ribosylation factor GTPase-activating protein, putative (ARFGAP)	PBANKA_145780 [261-280]	0	2820.21	S3(Phospho): 45.9; S4(Phospho): 45.9	109.5	164.8	96.7	140.8	70	73	66.9	78.4	172.9	260.2	152.6	222.3	110.5	115.2	105.6	123.7	94.4	158.6	99.1	156.1	110.5	99.6	102.3	96.1	10	10	10	10	10	10	10	10	3.48102	High	6.14768	5.957e-05	0.0003451	56.43	8.92263
[R].NTNTNNVDNVDISNQDDDNDDNNNLISEK.[L]	2xTMT6plex [N-Term; K29]; 1xDeamidated [N/Q]		1	27	PBANKA_141570	transcription factor with AP2 domain(s), putative (ApiAP2)	PBANKA_141570 [1694-1722]	0	3722.69		76.5	86.6	72	133.2	95.1	106.4	90.9	139.2	15.2	17.2	14.3	26.5	18.9	21.2	18.1	27.7	8.3	10.5	9.3	18.6	18.9	18.3	17.5	21.5	1	2	2	2	2	2	2	2	2.6816	High	7.19304	5.957e-05	0.0003646	33.77	5.31117
[K].DYPYDYPLSSNAYNSGEPK.[A]	2xTMT6plex [N-Term; K19]; 1xPhospho [Y/S]		1	5	PBANKA_110160	chromosome assembly factor 1, putative	PBANKA_110160 [639-657]	0	2718.24	Y13(Phospho): 63.2	98.6	115.7	42	91.8	129.6	121.9	125.3	75.2	13	15.3	5.5	12.1	17.1	16.1	16.5	9.9	7.1	9.3	3.6	8.5	17.1	13.9	16	7.7	1	1	1	1	1	1	1	1	2.53188	High	0.396576	0.0002967	0.001289	38.01	0.396576
[K].NKEEEEDDEGNTSNK.[M]	3xTMT6plex [N-Term; K2; K15]; 1xPhospho [T12(90.3)]	PBANKA_112270 1xPhospho [T1699(90.3)]	1	2	PBANKA_112270	tyrosine kinase-like protein, putative (TKL4)	PBANKA_112270 [1688-1702]	1	2505.16	T12(Phospho): 90.33	66.8	123.1	83.6	100	102.3	106.9	103.2	114.1	27.7	51	34.7	41.4	42.4	44.3	42.7	47.3	15.1	31.1	22.5	29.1	42.4	38.3	41.4	36.7	1	1	1	1	1	1	1	1	3.16361	High	-0.442175	3.638e-05	0.000157	28.02	-0.442175
[K].QNSDTEIPEK.[R]	2xTMT6plex [N-Term; K10]; 1xPhospho [S3(100)]	PBANKA_092370 1xPhospho [S8(100)]	1	4	PBANKA_092370	ethanolamine kinase, putative (EK)	PBANKA_092370 [6-15]	0	1698.84	S3(Phospho): 100	95.6	105.9	108.1	195.6	80.3	83.4	95.6	35.5	68.7	76.1	77.6	140.5	57.7	59.9	68.7	25.5	37.5	46.4	50.4	98.7	57.7	51.8	66.5	19.8	1	1	1	1	1	1	1	1	3.48505	High	-0.784142	0.0006943	0.003604	21.58	-0.784142
[K].IFNYLEINENDDNSNEGENNYK.[N]	2xTMT6plex [N-Term; K22]; 1xDeamidated [N]; 1xPhospho [S14(100)]	PBANKA_132920 1xPhospho [S2200(100)]	1	24	PBANKA_132920	dynein beta chain, putative	PBANKA_132920 [2187-2208]	0	3187.41	S14(Phospho): 99.96	53.6	66.3	52.6	90.3	145.6	117.6	125.9	148	7.7	9.5	7.5	13	20.9	16.9	18.1	21.2	4.2	5.8	4.9	9.1	20.9	14.6	17.5	16.5	2	2	2	3	3	3	3	3	3.09139	High	2.10775	0	7.077e-06	43.79	2.10775
[K].LKEEINVNSDNDSDIGIK.[Y]	3xTMT6plex [N-Term; K2; K18]; 1xDeamidated [N]; 2xPhospho [S9(100); S13(100)]	PBANKA_083130 2xPhospho [S410(100); S414(100)]	1	3	PBANKA_083130	peptidyl-prolyl cis-trans isomerase, putative (CYP72)	PBANKA_083130 [402-419]	1	2851.4	S9(Phospho): 100; S13(Phospho): 100	63.2	53.4	56.2	123.6	119.4	165.4	101.9	116.9	6.4	5.4	5.7	12.5	12.1	16.8	10.3	11.8	3.5	3.3	3.7	8.8	12.1	14.5	10	9.2	1	1	1	1	1	1	1	1	3.01333	High	1.66466	0.0004851	0.002369	35.11	1.66466
[R].YPMHMNYNLQNNSNQQR.[N]	1xTMT6plex [N-Term]; 1xDeamidated [N/Q]; 2xOxidation [M3; M5]		1	16	PBANKA_103270	RNA binding protein Bruno, putative (HoBo)	PBANKA_103270 [324-340]	0	2414.08		80.6	96	74.3	133.1	77.2	103.9	112.1	122.7	13.4	15.9	12.3	22.1	12.8	17.2	18.6	20.3	7.3	9.7	8	15.5	12.8	14.9	18	15.8	1	1	1	1	1	1	1	1	3.04046	High	8.80785	0	0.0001006	37.92	8.80785
[K].VEYDSLENVSK.[Q]	2xTMT6plex [N-Term; K11]; 1xPhospho [S5(99.5)]	PBANKA_142590 1xPhospho [S296(99.5)]	1	7	PBANKA_142590	conserved Plasmodium protein, unknown function	PBANKA_142590 [292-302]	0	1820.91	S5(Phospho): 93.74	86	96.1	96.3	173.4	99.5	87.8	98.8	62.1	48.2	53.8	53.9	97.1	55.7	49.1	55.3	34.8	26.3	32.8	35	68.2	55.7	42.5	53.6	27	3	3	3	3	3	3	3	3	2.77421	High	1.05386	0.0002804	0.001223	44.52	1.45609
[K].SSDANNYK.[E]	2xTMT6plex [N-Term; K8]		1	2	PBANKA_061320	DNA polymerase alpha, putative	PBANKA_061320 [1129-1136]	0	1356.72		61	140.7	86	75.9	122.4	95.3	117.8	100.8	7.3	16.9	10.3	9.1	14.7	11.4	14.1	12.1	4	10.3	6.7	6.4	14.7	9.9	13.7	9.4	1	1	1	1	1	1	1	1	1.37566	High	-0.441291	0.001573	0.01217	17.58	-0.441291
[-].MYNSNGNNNTGNVAGTTYGAVYNQGSYDYNSEK.[E]	1xTMT6plex [K33]; 1xAcetyl [N-Term]; 2xDeamidated [N/Q]; 1xOxidation [M1]	PBANKA_146140 1xAcetyl [N-Term]	1	7	PBANKA_146140	bax inhibitor 1, putative	PBANKA_146140 [1-33]	0	3856.64		73	146.2	104.8	115.2	95	43.4	103	119.3	6.2	12.5	8.9	9.8	8.1	3.7	8.8	10.2	3.4	7.6	5.8	6.9	8.1	3.2	8.5	7.9	1	1	1	1	1	1	1	1						17.94	4.55662
[K].GNEYTAGENHGSDTGNNNGGNNVYPR.[D]	1xTMT6plex [N-Term]; 1xDeamidated [N]		1	6	PBANKA_113590	conserved Plasmodium protein, unknown function	PBANKA_113590 [3120-3145]	0	2938.28		44.6	94.1	61.6	61.9	132.1	128.6	127.4	149.9	2.6	5.4	3.5	3.6	7.6	7.4	7.3	8.6	1.4	3.3	2.3	2.5	7.6	6.4	7.1	6.7	1	1	1	1	1	1	1	1	2.53568	High	0.515632	5.957e-05	0.0002554	32.83	0.515632
[K].LELNPEGNAENNQTNENQDTNNEESEIK.[Y]	2xTMT6plex [N-Term; K28]; 1xPhospho [T14(95.2)]; 2xDeamidated [Q/N]	PBANKA_111860 1xPhospho [T728(95.2)]	1	46	PBANKA_111860	cell division cycle protein 48 homologue, putative	PBANKA_111860 [715-742]	0	3727.65	T14(Phospho): 95.21	50.4	105.4	98.9	115.2	122.6	128.3	122.3	56.9	6	12.6	11.9	13.8	14.7	15.4	14.7	6.8	3.3	7.7	7.7	9.7	14.7	13.3	14.2	5.3	1	1	1	1	1	1	1	1	2.88839	High	6.72969	5.957e-05	0.0002295	33.83	6.72969
[K].GAYILEDFENNNDK.[Q]	2xTMT6plex [N-Term; K14]		1	2	PBANKA_010910	transketolase, putative (TK)	PBANKA_010910 [538-551]	0	2100.06		49	105.8	104.2	118.7	81.8	107.3	105.6	127.6	6.2	13.5	13.2	15.1	10.4	13.6	13.4	16.2	3.4	8.2	8.6	10.6	10.4	11.8	13	12.6	1	1	1	1	1	1	1	1	2.23424	High	-3.049	0.0003692	0.001668	32.56	-3.049
[K].SEHIGNDNTTSSNINNR.[S]	1xTMT6plex [N-Term]; 1xDeamidated [N]; 1xPhospho [T/S]		1	10	PBANKA_091180	DnaJ protein, putative	PBANKA_091180 [57-73]	0	2182.96	T9(Phospho): 24.95; T10(Phospho): 24.95; S11(Phospho): 24.95; S12(Phospho): 24.95	72.7	55.5	61.1	139.6	109.7	130.9	45.8	184.8	6.2	4.8	5.2	12	9.4	11.2	3.9	15.8	3.4	2.9	3.4	8.4	9.4	9.7	3.8	12.3	1	1	1	1	1	1	1	1	1.56532	High	-1.20977	0.002755	0.02419	10.97	10.7011
[K].NVSNEQNDNQSNAFVNDGNSDNELLEDYPEDEDEDE.[-]	1xTMT6plex [N-Term]; 1xPhospho [S/Y]		1	20	PBANKA_100850	translocon component PTEX150 (PTEX150)	PBANKA_100850 [884-919]	0	4425.74		38.5	45.1	30.1	56.7	97	76.2	62.8	393.5	5.3	6.2	4.2	7.8	13.4	10.5	8.7	54.3	2.9	3.8	2.7	5.5	13.4	9.1	8.4	42.2	1	1	1	1	1	1	1	1	3.34285	High	1.40485	0	2.038e-05	43.37	0.52223
[R].TNSSLFFSNNDNMSNNNESK.[A]	2xTMT6plex [N-Term; K20]; 1xPhospho [T/S]; 1xOxidation [M13]	PBANKA_145780 1xPhospho [S263(80.7)]	1	35	PBANKA_145780	ADP-ribosylation factor GTPase-activating protein, putative (ARFGAP)	PBANKA_145780 [261-280]	0	2818.24		100.2	148.3	95.9	140.5	72.6	80.5	68.9	93	153.8	227.7	147.2	215.7	111.5	123.5	105.7	142.8	84	138.8	95.6	151.5	111.5	106.8	102.4	110.9	8	8	8	8	8	8	8	8	3.22659	High	-5.71105	0.003302	0.02751	62.93	-4.71005
[K].MFSIQMQAIPALMCGRDIIAIAETGSGK.[T]	2xPhospho [S3; T24]; 1xTMT6plex [K28]; 1xAcetyl [N-Term]; 2xDeamidated [Q5; Q7]; 1xOxidation [M1]	PBANKA_110830 2xPhospho [S594; T615]; 1xAcetyl [N-Term]	1	1	PBANKA_110830	pre-mRNA-processing ATP-dependent RNA helicase PRP5, putative (PRP5)	PBANKA_110830 [592-619]	1	3401.55		74.3	71.2	79.8	155.4	152.6	63.1	138.7	64.9	5.3	5.1	5.7	11.1	10.9	4.5	9.9	4.6	2.9	3.1	3.7	7.8	10.9	3.9	9.6	3.6	1	1	1	1	1	1	1	1						15.11	-1.88284
[K].FNTANSINEQK.[L]	2xTMT6plex [N-Term; K11]; 1xPhospho [S6(98.8)]	PBANKA_091260 1xPhospho [S1645(98.8)]	1	2	PBANKA_091260	conserved Plasmodium protein, unknown function	PBANKA_091260 [1640-1650]	0	1803.9	S6(Phospho): 98.82	82.7	141.2	88.2	110.9	71.4	104.5	107.5	93.6	25.3	43.1	27	33.9	21.8	31.9	32.8	28.6	13.8	26.3	17.5	23.8	21.8	27.6	31.8	22.2	1	1	1	1	1	1	1	1	2.4153	High	1.16139	0.0008111	0.005019	46.73	1.16139
[K].NEEYEDEDDEEADK.[K]	2xTMT6plex [N-Term; K14]		1	2	PBANKA_114590	conserved rodent malaria protein, unknown function	PBANKA_114590 [89-102]	0	2187.95		82.3	94.5	78.3	141.8	92.8	113.9	97.7	98.6	36.4	41.8	34.7	62.8	41.1	50.4	43.3	43.6	19.9	25.5	22.5	44.1	41.1	43.6	41.9	33.9	1	1	1	1	1	1	1	1	3.41557	High	0.994631	0	5.002e-06	57.98	0.994631
[K].IANSIDEEK.[L]	2xTMT6plex [N-Term; K9]; 1xPhospho [S4(100)]	PBANKA_110520 1xPhospho [S235(100)]	1	2	PBANKA_110520	conserved Plasmodium protein, unknown function	PBANKA_110520 [232-240]	0	1556.8	S4(Phospho): 100	92.1	123.1	88.6	142.5	100	86.8	96.1	70.7	77.3	103.3	74.4	119.6	83.9	72.9	80.6	59.4	42.2	63	48.3	84	83.9	63	78.1	46.1	1	1	1	1	1	1	1	1	2.97339	High	0.0547984	0.0004851	0.002178	25.49	0.0547984
[K].DKDILDSVEINDSGNITSDDIK.[E]	3xTMT6plex [N-Term; K2; K22]; 1xPhospho [S/T]; 1xDeamidated [N15]	PBANKA_124300 1xPhospho [T78(88.4)]	1	3	PBANKA_124300	palmitoyltransferase (DHHC7)	PBANKA_124300 [62-83]	1	3174.59		89.7	95.5	83.1	157.7	104.3	126.4	111.4	32	12.6	13.5	11.7	22.2	14.7	17.8	15.7	4.5	6.9	8.2	7.6	15.6	14.7	15.4	15.2	3.5	1	1	1	1	1	1	1	1	3.7579	High	3.47999	0	1.148e-05	60.17	3.47999
[K].TANDDDDNDIDLFGDSNNDDK.[S]	2xTMT6plex [N-Term; K21]; 1xPhospho [T/S]; 2xDeamidated [N8; N]	PBANKA_081420 1xPhospho [S105(100)]	1	3	PBANKA_081420	elongation factor 1-beta, putative	PBANKA_081420 [90-110]	0	2868.16		65.8	82.6	97.3	156.9	110.2	105.5	113.8	68	15.9	20	23.6	38	26.7	25.6	27.6	16.5	8.7	12.2	15.3	26.7	26.7	22.1	26.7	12.8	1	1	1	1	1	1	1	1	4.47054	High	7.58595	0	2.036e-06	73.15	7.58595
[R].SSEEANNSETHINNK.[N]	2xTMT6plex [N-Term; K15]; 1xPhospho [S/T]		1	6	PBANKA_082690	protein kinase, putative	PBANKA_082690 [1711-1725]	0	2212.03		62.6	101.2	74.9	100.7	93.2	104.7	116	146.8	18.7	30.2	22.3	30	27.8	31.2	34.6	43.8	10.2	18.4	14.5	21.1	27.8	27	33.5	34	2	2	2	2	2	2	2	2	1.56012	High	0.723598	0.00766	0.06485	26.31	2.04803
[K].YHSDSEIAK.[Q]	2xTMT6plex [N-Term; K9]; 1xPhospho [S3(100)]	PBANKA_080790 1xPhospho [S2498(99.7)]	1	4	PBANKA_080790	conserved Plasmodium protein, unknown function	PBANKA_080790 [2496-2504]	0	1587.78		88.8	135.3	97.4	137.9	85.6	85.5	87.2	82.3	138.1	210.5	151.4	214.4	133.1	133	135.6	128	75.4	128.3	98.3	150.6	133.1	115	131.3	99.4	1	1	1	1	1	1	1	1	2.70224	High	0.350181	0.0004268	0.001821	25.82	0.350181
[R].NNIDIDDIDSMDK.[N]	2xTMT6plex [N-Term; K13]; 1xOxidation [M11]; 1xPhospho [S10(100)]	PBANKA_123350 1xPhospho [S1141(100)]	1	2	PBANKA_123350	mRNA-binding protein PUF1 (PUF1)	PBANKA_123350 [1132-1144]	0	2061.95	S10(Phospho): 100	74.4	98.3	99.4	156.4	106.5	116.2	91.4	57.4	11.2	14.8	14.9	23.5	16	17.5	13.7	8.6	6.1	9	9.7	16.5	16	15.1	13.3	6.7	1	1	1	1	1	1	1	1	2.46441	High	-4.54101	0.0004851	0.002279	32.56	-4.54101
[K].TQSYEDSSTENASTSYMSTLKTDEESNTAGEDR.[K]	2xTMT6plex [N-Term; K21]; 2xPhospho [S/T]; 2xDeamidated [N11; N27]; 1xOxidation [M17]	PBANKA_136550 2xPhospho [T/S]	1	5	PBANKA_136550	intra-erythrocytic P. berghei-induced structures protein 1 (IBIS1)	PBANKA_136550 [101-133]	1	4270.73		98.6	113		177.8	86.1	79.7	75.6	169.1	4.6	5.2		8.3	4	3.7	3.5	7.9	2.5	3.2		5.8	4	3.2	3.4	6.1	1	1		1	1	1	1	1						33.68	6.13451
[R].SINGSIANK.[E]	2xTMT6plex [N-Term; K9]; 1xDeamidated [N3]; 1xPhospho [S1(100)]	PBANKA_081200 1xPhospho [S7(100)]	1	12	PBANKA_081200	DNA primase large subunit, putative	PBANKA_081200 [7-15]	0	1442.77	S1(Phospho): 100	110.4	170.6	114.2	158.5	61.8	59.4	63.7	61.4	573.3	886.3	593.3	823.4	320.9	308.5	330.8	318.9	313	540.3	385.2	578.3	320.9	266.8	320.4	247.7	5	5	5	5	5	5	5	5	3.85091	High	0.112734	0.0001929	0.0009485	32.59	-0.141091
[R].NSLNNMANSNNNQNNPNTPR.[N]	1xTMT6plex [N-Term]; 1xDeamidated [N/Q]; 1xOxidation [M6]		1	27	PBANKA_070450	E3 ubiquitin-protein ligase, putative	PBANKA_070450 [2724-2743]	0	2474.13		54	102.3	75.6	87.6	95.7	107.6	115.1	162.2	12.6	23.9	17.7	20.5	22.4	25.2	27	38	6.9	14.6	11.5	14.4	22.4	21.8	26.1	29.5	2	3	3	3	3	3	3	3	4.26599	High	8.02003	0	2.032e-08	96.1	8.02003
[R].ENSDDESEEDRK.[K]	2xTMT6plex [N-Term; K12]; 1xPhospho [S]	PBANKA_114580 1xPhospho [S68(100)]	1	1	PBANKA_114580	conserved rodent malaria protein, unknown function	PBANKA_114580 [66-77]	1	1990.86		94.1	114.8	99.1	167.9	119.2	91.4	58.9	54.5	21.8	26.6	22.9	38.9	27.6	21.2	13.6	12.6	11.9	16.2	14.9	27.3	27.6	18.3	13.2	9.8	1	1	1	1	1	1	1	1	2.5463	High	0.672848	0.0009311	0.007403	16.29	0.672848
[K].GNEYTAGENHGSDTGNNNGGNNVYPR.[D]	1xTMT6plex [N-Term]; 3xDeamidated [N18; N]		1	2	PBANKA_113590	conserved Plasmodium protein, unknown function	PBANKA_113590 [3120-3145]	0	2940.25		49.5	105.9	95.4	106	110.7	67	127.2	138.3	7.5	16.1	14.5	16.1	16.8	10.2	19.3	21	4.1	9.8	9.4	11.3	16.8	8.8	18.7	16.3	1	1	1	1	1	1	1	1	1.42473	High	5.0565	0.007228	0.06152	8.65	5.0565
[R].LPSSSEGDQLK.[K]	2xTMT6plex [N-Term; K11]; 2xPhospho [S5(92.4); S]	PBANKA_061160 2xPhospho [S10(100); S11(99.3)]	1	3	PBANKA_061160	ribonucleoside-diphosphate reductase, large subunit, putative	PBANKA_061160 [8-18]	0	1778.84	S3(Phospho): 100; S4(Phospho): 99.27	104	146.1	104.8	159.1	67.8	72.8	71.4	74	45.4	63.8	45.7	69.5	29.6	31.8	31.2	32.3	24.8	38.9	29.7	48.8	29.6	27.5	30.2	25.1	2	2	2	2	2	2	2	2	2.52833	High	-0.312675	0.0007888	0.004589	34.85	-1.41821
[K].EGNPVEEGNVETPSTSLIEDDYNNK.[S]	2xTMT6plex [N-Term; K25]		1	2	PBANKA_091020	protein phosphatase 2C, putative	PBANKA_091020 [187-211]	0	3208.55		58.6	109.9	103.2	126.7	130	120.3	107.4	43.8	5.9	11	10.3	12.7	13	12	10.7	4.4	3.2	6.7	6.7	8.9	13	10.4	10.4	3.4	1	1	1	1	1	1	1	1	3.31678	High	-3.74822	0	2.179e-06	56.87	-3.74822
[R].EVSRETISTESTVTQNACPLR.[R]	1xTMT6plex [N-Term]; 1xCarbamidomethyl [C18]; 1xPhospho [S/T]		1	4	PBANKA_061160	ribonucleoside-diphosphate reductase, large subunit, putative	PBANKA_061160 [815-835]	1	2687.29	S8(Phospho): 45.29; T9(Phospho): 45.29	87.6	143.9	87.6	112.1	93.8	95.5	85.7	93.8	38.8	63.8	38.8	49.7	41.6	42.3	38	41.6	21.2	38.9	25.2	34.9	41.6	36.6	36.8	32.3	1	1	1	1	1	1	1	1	2.243	High	1.33122	0.0004851	0.00232
[K].GDIDGMDTSNINNNTNDINNNK.[N]	2xTMT6plex [N-Term; K22]; 2xDeamidated [N]; 1xOxidation [M6]		1	4	PBANKA_123160	transcription factor with AP2 domain(s), putative (ApiAP2)	PBANKA_123160 [81-102]	0	2869.32		84.6	106.2	97.8	160.2	89.9	101.7	95.4	64.3	26.9	33.8	31.1	51	28.6	32.4	30.4	20.5	14.7	20.6	20.2	35.8	28.6	28	29.4	15.9	1	1	1	1	1	1	1	1	2.49273	High	-2.56166	0.001882	0.01492	22.76	-2.56166
[R].SDGIQGGNNEVQAGSESIIEK.[N]	2xTMT6plex [N-Term; K21]		1	2	PBANKA_134910	merozoite surface protein 7 (MSP7)	PBANKA_134910 [187-207]	0	2590.34		98.5	149	89.3	125.7	85.6	96	71.2	84.7	18.9	28.5	17.1	24.1	16.4	18.4	13.6	16.2	10.3	17.4	11.1	16.9	16.4	15.9	13.2	12.6	1	1	1	1	1	1	1	1	3.3646	High	1.85125	0	9.964e-05	58.5	1.85125
[K].GNSKEYAANNIEETIPININN.[-]	2xTMT6plex [N-Term; K4]; 1xPhospho [Y/T/S]; 1xDeamidated [N18]		1	2	PBANKA_124300	palmitoyltransferase (DHHC7)	PBANKA_124300 [378-398]	1	2857.4		113.8	191.5	117.7	147.1	73.1	63.1	32.1	61.6	13.6	22.8	14	17.5	8.7	7.5	3.8	7.3	7.4	13.9	9.1	12.3	8.7	6.5	3.7	5.7	1	1	1	1	1	1	1	1	3.68164	High	8.42622	0.001283	0.009848	22.85	8.42622
[K].DFTSDEQATNYISMERESDNSIR.[K]	1xTMT6plex [N-Term]; 1xDeamidated [N20]; 1xOxidation [M14]; 2xPhospho [S18(88.6); S21(95.8)]	PBANKA_112990 2xPhospho [S826(88.6); S829(95.8)]	1	2	PBANKA_112990	conserved Plasmodium protein, unknown function	PBANKA_112990 [809-831]	1	3114.25	S18(Phospho): 88.64; S21(Phospho): 95.81	59.4	129.6	85.8	81.7	104.8	132.7	111.7	94.2	7.1	15.6	10.3	9.8	12.6	16	13.4	11.3	3.9	9.5	6.7	6.9	12.6	13.8	13	8.8	1	1	1	1	1	1	1	1	1.92435	High	7.19344	0.00271	0.02219
[K].EIDSNNNDDDIEIFNELANEEK.[E]	2xTMT6plex [N-Term; K22]; 2xDeamidated [N]; 1xPhospho [S4(100)]	PBANKA_093960 1xPhospho [S2100(100)]	1	19	PBANKA_093960	polyadenylate-binding protein-interacting protein 1, putative (PAIP1)	PBANKA_093960 [2097-2118]	0	3120.38	S4(Phospho): 100	67.9	103.7	96.8	136.5	101.1	129.9	119	45.1	16.9	25.8	24	33.9	25.1	32.3	29.5	11.2	9.2	15.7	15.6	23.8	25.1	27.9	28.6	8.7	4	4	4	4	4	4	4	3	2.71899	High	9.64944	5.957e-05	0.0003503	55.69	8.71055
[K].EEDFDGETKDSENDPKEEK.[N]	4xTMT6plex [N-Term; K9; K16; K19]; 1xPhospho [T/S]	PBANKA_101670 1xPhospho [S247(85.4)]	1	3	PBANKA_101670	conserved Plasmodium protein, unknown function	PBANKA_101670 [237-255]	2	3237.55		72.4	90.2	96	155.4	96.2	104.3	102.5	83	16.9	21	22.3	36.2	22.4	24.3	23.9	19.3	9.2	12.8	14.5	25.4	22.4	21	23.1	15	1	1	1	1	1	1	1	1	2.33333	High	-0.794837	0.0001087	0.0004963	24.16	-0.794837
[R].ENYYNSNDENDGNNENNENNENNENDK.[N]	2xTMT6plex [N-Term; K27]; 1xPhospho [S6(91.2)]	PBANKA_144780 1xPhospho [S57(91.2)]	1	4	PBANKA_144780	conserved Plasmodium protein, unknown function	PBANKA_144780 [52-78]	0	3757.48	S6(Phospho): 91.24	97.5	133.7	87.1	135.9	119.6	101.3	62.2	62.8	23.8	32.6	21.3	33.2	29.2	24.7	15.2	15.3	13	19.9	13.8	23.3	29.2	21.4	14.7	11.9	2	2	2	2	2	2	2	2	3.2591	High	0.336549	0	4.976e-05	57.98	-0.618247
[K].YTHNENENSMK.[E]	2xTMT6plex [N-Term; K11]; 1xOxidation [M10]; 1xPhospho [S9(100)]	PBANKA_091910 1xPhospho [S163(100)]	1	2	PBANKA_091910	parasitophorous vacuolar protein 1, putative (PV1)	PBANKA_091910 [155-165]	0	1920.86	S9(Phospho): 99.97	78.2	102.6	90.7	143.5	79.5	103.8	91.9	109.9	10.6	13.9	12.3	19.5	10.8	14.1	12.5	14.9	5.8	8.5	8	13.7	10.8	12.2	12.1	11.6	1	1	1	1	1	1	1	1	1.45534	High	0.594525	0.003177	0.02639	22.14	0.594525
[K].DVLDYSNNNNNELEGNK.[N]	2xTMT6plex [N-Term; K17]; 1xPhospho [Y5(88.9)]; 3xDeamidated [N9; N]	PBANKA_100200 1xPhospho [Y76(88.9)]	1	10	PBANKA_100200	conserved Plasmodium protein, unknown function	PBANKA_100200 [72-88]	0	2493.11		40	79.6	89.5	109.9	99.8	143	125.6	112.6	5.9	11.6	13.1	16.1	14.6	20.9	18.4	16.5	3.2	7.1	8.5	11.3	14.6	18.1	17.8	12.8	1	1	1	1	1	1	1	1	2.60026	High	7.43561	5.957e-05	0.0002806	45.8	7.43561
[K].EINTISYELEDSGSENEEENSEDNK.[K]	2xTMT6plex [N-Term; K25]; 2xPhospho [S/T/Y]; 2xDeamidated [N16; N]		1	19	PBANKA_123220	FACT complex subunit SPT16 (FACT-L)	PBANKA_123220 [432-456]	0	3494.42		38.7	110	90.1	77.6	125.6	124.6	114.3	119.1	11.7	33.3	27.3	23.5	38	37.7	34.6	36.1	6.4	20.3	17.7	16.5	38	32.6	33.5	28	3	4	4	4	4	4	4	4	3.60394	High	6.16957	0	9.546e-07	69.97	6.16957
[K].RMDFFEENHISENSQDEEETNLK.[K]	2xTMT6plex [N-Term; K23]; 2xPhospho [S11(94.8); T/S]; 1xDeamidated [N/Q]; 1xOxidation [M2]	PBANKA_091000 2xPhospho [S1225(94.8); S1228(94.8)]	1	3	PBANKA_091000	conserved Plasmodium protein, unknown function	PBANKA_091000 [1215-1237]	1	3476.46		53	105.3	100.2	118.4	101.2	138	80.3	103.6	5.9	11.6	11.1	13.1	11.2	15.3	8.9	11.5	3.2	7.1	7.2	9.2	11.2	13.2	8.6	8.9	1	1	1	1	1	1	1	1	2.44413	High	4.00041	0.0008711	0.006195	27.87	4.00041
[K].LSQENNSVHEK.[E]	2xTMT6plex [N-Term; K11]; 1xPhospho [S7(100)]	PBANKA_092400 1xPhospho [S221(100)]	1	2	PBANKA_092400	conserved Plasmodium protein, unknown function	PBANKA_092400 [215-225]	0	1822.91	S7(Phospho): 100	81	111	97.6	148.3	97.1	103.3	97.2	64.4	49.1	67.3	59.1	89.8	58.8	62.6	58.9	39	26.8	41	38.4	63.1	58.8	54.1	57	30.3	1	1	1	1	1	1	1	1	3.5357	High	0.739101	5.957e-05	0.0002996	36.33	0.739101
[K].LGNMGGDMSNLAGLGGMDQFK.[N]	1xPhospho [S9]; 1xTMT6plex [K21]; 1xAcetyl [N-Term]; 1xDeamidated [N/Q]; 2xOxidation [M17; M]	PBANKA_131740 1xPhospho [S180]; 1xAcetyl [N-Term]	1	2	PBANKA_131740	co-chaperone p23, putative	PBANKA_131740 [172-192]	0	2497.06		69.8	100	58.7	86.8	131.5	117.9	150.5	84.7	7.3	10.5	6.2	9.1	13.8	12.4	15.8	8.9	4	6.4	4	6.4	13.8	10.7	15.3	6.9	1	1	1	1	1	1	1	1						34.73	6.43345
[K].NTNIVETGSEK.[Q]	2xTMT6plex [N-Term; K11]; 2xPhospho [T7; S9]	PBANKA_121160 2xPhospho [T561; S563]	1	1	PBANKA_121160	conserved Plasmodium protein, unknown function	PBANKA_121160 [555-565]	0	1809.84		55.7	113.2	105.2	120.5	130.6	94.4	101.9	78.4	7.5	15.3	14.2	16.2	17.6	12.7	13.7	10.6	4.1	9.3	9.2	11.4	17.6	11	13.3	8.2	1	1	1	1	1	1	1	1						29.02	-0.795332
[K].LLNDDNNIDNSSYNK.[V]	2xTMT6plex [N-Term; K15]; 1xDeamidated [N14]; 2xPhospho [S11(86.3); S/Y]		2	2	PBANKA_000630	BIR protein,PIR protein	PBANKA_000630 [183-197]	0	2358.03	S11(Phospho): 66.67; S12(Phospho): 66.67; Y13(Phospho): 66.67	91.9	130.8	89.8	132.5	72.4	100.1	90.3	92.2	21.4	30.5	20.9	30.9	16.9	23.4	21.1	21.5	11.7	18.6	13.6	21.7	16.9	20.2	20.4	16.7	1	1	1	1	1	1	1	1	1.35457	High	4.57283	0.003214	0.0267
[K].IEQTDNEENEIHK.[E]	2xTMT6plex [N-Term; K13]; 1xPhospho [T4(100)]	PBANKA_094230 1xPhospho [T378(100)]	1	6	PBANKA_094230	radial spoke head protein, putative	PBANKA_094230 [375-387]	0	2137.02		91.4	111.1	95.4	160.1	88.4	94.7	97	61.9	123.1	149.6	128.5	215.6	119.1	127.5	130.6	83.3	67.2	91.2	83.4	151.4	119.1	110.3	126.5	64.7	3	3	3	3	3	3	3	3	4.53605	High	1.65324	0	3.09e-05	53.99	1.65324
[K].SEHASDQDVK.[K]	2xTMT6plex [N-Term; K10]		1	2	PBANKA_132970	26S proteasome regulatory subunit RPN2, putative (RPN2)	PBANKA_132970 [421-430]	0	1573.82		43.9	119.7	108.9	100.7	90.1	92.3	115.4	129.2	3.8	10.5	9.5	8.8	7.9	8.1	10.1	11.3	2.1	6.4	6.2	6.2	7.9	7	9.8	8.8	1	1	1	1	1	1	1	1	2.36354	High	-0.104906	0.0001087	0.0006125	30.01	-0.104906
[R].SMVHNISESEK.[K]	2xTMT6plex [N-Term; K11]; 1xOxidation [M2]; 1xPhospho [S1(100)]	PBANKA_040740 1xPhospho [S287(100)]	1	2	PBANKA_040740	serine/threonine protein kinase, putative (ARK2)	PBANKA_040740 [287-297]	0	1814.88	S1(Phospho): 100	87.9	98.9	75	137.2	91.5	96.5	110	102.9	25.1	28.2	21.4	39.2	26.1	27.5	31.4	29.4	13.7	17.2	13.9	27.5	26.1	23.8	30.4	22.8	1	1	1	1	1	1	1	1	2.79821	High	0.315802	0.0001929	0.0009917	32.63	0.315802
[K].NNNGDNKNDDNNDPGVEK.[N]	3xTMT6plex [N-Term; K7; K18]; 1xDeamidated [N2]		1	1	PBANKA_135370	nucleolar complex protein 2, putative	PBANKA_135370 [800-817]	1	2661.3		109.9	128.9	54.2	107.5	122.1	96.9	99.3	81.2	10.6	12.5	5.2	10.4	11.8	9.4	9.6	7.9	5.8	7.6	3.4	7.3	11.8	8.1	9.3	6.1	1	1	1	1	1	1	1	1	1.41559	High	0.261908	0.008801	0.07635
[K].LDVDTQSETIENNNFEK.[N]	2xTMT6plex [N-Term; K17]; 1xPhospho [S/T]	PBANKA_091750 1xPhospho [S131(98.5)]	1	6	PBANKA_091750	structural maintenance of chromosome protein, putative	PBANKA_091750 [125-141]	0	2534.21	S7(Phospho): 98.53	94.2	126.9	69.9	110.7	92	100.7	108	97.6	43.6	58.7	32.3	51.3	42.6	46.6	50	45.2	23.8	35.8	21	36	42.6	40.3	48.4	35.1	2	2	2	2	2	2	2	2	3.90777	High	-5.55189	0	1.44e-05	63.57	-5.55189
[K].NIESVNSEK.[N]	2xTMT6plex [N-Term; K9]; 1xPhospho [S7(99.6)]	PBANKA_020830 1xPhospho [S499(99.6)]	1	4	PBANKA_020830	novel putative transporter 1 (NPT1)	PBANKA_020830 [493-501]	0	1557.79	S7(Phospho): 100	84.1	101.4	82.7	140.4	105.6	120.1	105.6	60.1	121.8	146.8	119.8	203.3	153	173.9	152.9	87	66.5	89.5	77.8	142.8	153	150.4	148.1	67.6	2	2	2	2	2	2	2	2	3.51949	High	0.518695	0.0003306	0.001418	39.98	0.745147
[K].INETDIFDDDGQHGVEFLDDESDEEDQGEINNDR.[K]	1xTMT6plex [N-Term]; 2xDeamidated [Q/N]; 1xPhospho [S22(100)]	PBANKA_090560 1xPhospho [S136(97.3)]	1	49	PBANKA_090560	translation initiation factor eIF-1A, putative	PBANKA_090560 [115-148]	0	4235.7	S22(Phospho): 100	69	76.9	39.2	81.2	117.1	123.7	168.3	124.6	6.8	7.5	3.9	8	11.5	12.1	16.5	12.2	3.7	4.6	2.5	5.6	11.5	10.5	16	9.5	2	2	1	2	2	2	2	2	5.60599	High	-0.577152	0	2.553e-09	49.95	7.8381
[K].NDDSDQEIK.[N]	2xTMT6plex [N-Term; K9]; 1xPhospho [S4(100)]	PBANKA_081360 1xPhospho [S830(100)]	1	3	PBANKA_081360	conserved Plasmodium protein, unknown function	PBANKA_081360 [827-835]	0	1601.75		89.1	106.5	88.6	150.7	93	103.5	105.8	62.8	94.5	112.9	94	159.8	98.6	109.7	112.1	66.6	51.6	68.8	61	112.2	98.6	94.9	108.6	51.7	2	2	2	2	2	2	2	2	2.65371	High	0.220898	0.0008711	0.006324	23.14	0.220898
[R].SEEFSNLDGYKVSSDEK.[T]	3xTMT6plex [N-Term; K11; K17]; 1xDeamidated [N6]; 2xPhospho [S5(95.1); S13(82.1)]	PBANKA_140500 2xPhospho [S417(95.1); S425(82.1)]	1	6	PBANKA_140500	conserved Plasmodium protein, unknown function	PBANKA_140500 [413-429]	1	2782.27	S5(Phospho): 95.1; S13(Phospho): 82.07	75.7	99.8	81.1	126.5	101.3	105.1	121.6	88.9	26.7	35.3	28.6	44.7	35.8	37.1	43	31.4	14.6	21.5	18.6	31.4	35.8	32.1	41.6	24.4	2	2	2	2	2	2	2	2	2.88529	High	8.42257	0.002899	0.025	13.79	8.42257
[K].SDIYNNNEEDKDNTSSEDINEK.[H]	3xTMT6plex [N-Term; K11; K22]; 1xDeamidated [N]; 3xPhospho [T14(98.1); S15(98.1); S16(98.1)]	PBANKA_120210 3xPhospho [T1024(98.1); S1025(98.1); S1026(98.1)]	1	4	PBANKA_120210	conserved Plasmodium protein, unknown function	PBANKA_120210 [1011-1032]	1	3501.45	T14(Phospho): 98.07; S15(Phospho): 98.07; S16(Phospho): 98.07	85.4	102.9	75.8	130.3	106.3	113.4	85.5	100.4	19.6	23.6	17.4	29.9	24.4	26	19.6	23	10.7	14.4	11.3	21	24.4	22.5	19	17.9	1	1	1	1	1	1	1	1	2.08863	High	6.15864	0.0009311	0.007016	19.02	6.15864
[K].IQDNDEDTDIK.[G]	2xTMT6plex [N-Term; K11]; 1xPhospho [T8(100)]	PBANKA_144820 1xPhospho [T3060(100)]	1	4	PBANKA_144820	asparagine/aspartate rich protein, putative	PBANKA_144820 [3053-3063]	0	1843.87	T8(Phospho): 100	80.6	94.6	94.5	158.2	93.8	94.8	108	75.6	131.9	154.9	154.6	259	153.5	155.2	176.8	123.7	72	94.4	100.4	181.9	153.5	134.2	171.2	96.1	2	2	2	2	2	2	2	2	4.28037	High	0.0546087	0	3.04e-05	63.58	0.0546087
[K].RLPSSSEGDQLK.[K]	2xTMT6plex [N-Term; K12]; 1xPhospho [S4(92.9)]; 1xDeamidated [Q10]	PBANKA_061160 1xPhospho [S10(92.9)]	1	3	PBANKA_061160	ribonucleoside-diphosphate reductase, large subunit, putative	PBANKA_061160 [7-18]	1	1855.96		109.5	157.4	110.3	160.2	68.2	61.2	66.3	66.8	323.3	464.6	325.5	472.7	201.3	180.7	195.7	197.1	176.5	283.2	211.3	332	201.3	156.3	189.5	153.1	1	1	1	1	1	1	1	1	4.92774	High	0.372071	0	0.0001109	42.46	0.372071
[K].RGNADDNDNTTEQADNQNSNDK.[K]	2xTMT6plex [N-Term; K22]		1	4	PBANKA_031230	conserved Plasmodium protein, unknown function	PBANKA_031230 [45-66]	1	2894.31		73.6	114.5	72.8	96.4	141.8	170.4	111.4	19.1	10.4	16.2	10.3	13.7	20.1	24.2	15.8	2.7	5.7	9.9	6.7	9.6	20.1	20.9	15.3	2.1	2	2	2	2	2	2	2	1	3.1944	High	-1.23312	0	2.584e-05	50.77	-1.23312
[K].DIDDDESLYER.[M]	1xTMT6plex [N-Term]; 1xPhospho [Y/S]	PBANKA_113880 1xPhospho [S1500(99.9)]	1	4	PBANKA_113880	conserved Plasmodium protein, unknown function	PBANKA_113880 [1494-1504]	0	1678.7		45.6	91.6	102.3	122.5	80	105.6	146.5	105.9	6	12.1	13.6	16.2	10.6	14	19.4	14	3.3	7.4	8.8	11.4	10.6	12.1	18.8	10.9	1	1	1	1	1	1	1	1	2.75772	High	-0.529132	5.957e-05	0.0003388	48.42	-0.529132
[K].LYGQPGANTPPPGDEDVDSDEL.[-]	1xTMT6plex [N-Term]		1	4	PBANKA_081890	heat shock protein 70, putative	PBANKA_081890 [630-651]	0	2515.17		67.9	138	101	105.5	109.8	104.7	42	131.2	9.5	19.4	14.2	14.8	15.4	14.7	5.9	18.4	5.2	11.8	9.2	10.4	15.4	12.7	5.7	14.3	2	2	2	2	2	2	2	2	2.7885	High	0.61446	0.0003512	0.001641	26.21	0.61446
[K].TEVVNETASDTSNGILDDTK.[D]	2xTMT6plex [N-Term; K20]; 2xPhospho [T/S]	PBANKA_103160 2xPhospho [S282(84.2); T/S]	1	4	PBANKA_103160	ribosome maturation protein SBDS, putative	PBANKA_103160 [274-293]	0	2727.24		89.1	95.7	70.3	134.3	104.9	121.3	113.1	71.3	21.1	22.6	16.6	31.8	24.8	28.7	26.7	16.9	11.5	13.8	10.8	22.3	24.8	24.8	25.9	13.1	1	1	1	1	1	1	1	1	3.49984	High	1.6062	0	2.296e-06	50.71	1.6062
[R].NIIQETFNYVNNLNK.[Q]	1xPhospho [Y/T]; 1xTMT6plex [K15]; 1xAcetyl [N-Term]; 1xDeamidated [N/Q]	PBANKA_131160 1xPhospho [Y/T]; 1xAcetyl [N-Term]	1	4	PBANKA_131160	calponin homology domain-containing protein, putative	PBANKA_131160 [1131-1145]	0	2176.05		78.3	107.9	74.7	112.7	82.4	139.5	94.3	110.2	12.3	16.9	11.7	17.7	12.9	21.9	14.8	17.3	6.7	10.3	7.6	12.4	12.9	18.9	14.3	13.4	1	1	1	1	1	1	1	1						25.69	-0.261016
[K].TAFNSGSK.[T]	2xTMT6plex [N-Term; K8]; 1xPhospho [T/S]	PBANKA_041600 1xPhospho [S835(100)]	1	2	PBANKA_041600	high molecular weight rhoptry protein 3, putative (RhopH3)	PBANKA_041600 [829-836]	0	1349.69		98.9	124.4	99.7	162	79.6	79.9	86.7	68.8	111.4	140.1	112.3	182.4	89.6	90	97.6	77.5	60.8	85.4	72.9	128.1	89.6	77.8	94.5	60.2	1	1	1	1	1	1	1	1	2.75542	High	0.481888	0.001096	0.008605	21.32	0.481888
[K].SNPDIDIDIDNVNNEDNTSQSSKK.[S]	3xTMT6plex [N-Term; K23; K24]; 2xPhospho [S/T]	PBANKA_145210 2xPhospho [S/T]	1	6	PBANKA_145210	conserved Plasmodium protein, unknown function	PBANKA_145210 [1428-1451]	1	3509.63		78.8	48.5	70.4	166.5	115.6	57.5	98.5	164.4	5.9	3.6	5.2	12.4	8.6	4.3	7.3	12.2	3.2	2.2	3.4	8.7	8.6	3.7	7.1	9.5	1	1	1	1	1	1	1	1						23.42	1.15302
[K].GLDYYLENDQESDSK.[N]	2xTMT6plex [N-Term; K15]; 1xPhospho [S12(99.8)]	PBANKA_020830 1xPhospho [S249(99.8)]	1	2	PBANKA_020830	novel putative transporter 1 (NPT1)	PBANKA_020830 [238-252]	0	2314.05	S12(Phospho): 99.84	103.8	100.8	94.6	185.1	79	88.6	97.8	50.3	21.8	21.2	19.9	38.9	16.6	18.6	20.5	10.6	11.9	12.9	12.9	27.3	16.6	16.1	19.9	8.2	1	1	1	1	1	1	1	1	2.78148	High	0.397981	0	0.000122	45.81	0.397981
[R].GNADDNDNTTEQADNQNSNDKK.[Q]	3xTMT6plex [N-Term; K21; K22]; 1xPhospho [T10(84.6)]	PBANKA_031230 1xPhospho [T55(84.6)]	1	2	PBANKA_031230	conserved Plasmodium protein, unknown function	PBANKA_031230 [46-67]	1	3175.44	T10(Phospho): 84.59	64.5	143.8	103.2	97.9	90.2	86.4	79	135	7.5	16.7	12	11.4	10.5	10.1	9.2	15.7	4.1	10.2	7.8	8	10.5	8.7	8.9	12.2	1	1	1	1	1	1	1	1	1.81071	High	-0.203579	0.002742	0.02408
[K].TEKGNEDENSEDELLYEQAEIDDNENNNDK.[H]	3xTMT6plex [N-Term; K3; K30]		1	2	PBANKA_041170	co-chaperone p23, putative	PBANKA_041170 [242-271]	1	4200.94		123	136.7	47.3	109.4	115.7	80.4	88.5	98.9	15.2	16.9	5.9	13.5	14.3	9.9	10.9	12.2	8.3	10.3	3.8	9.5	14.3	8.6	10.6	9.5	1	1	1	1	1	1	1	1	2.86939	High	-1.72703	0	5.707e-06	59.86	-1.72703
[K].KTSNNSDNLANLNNSDENISFEMK.[N]	3xTMT6plex [N-Term; K1; K24]; 1xDeamidated [N]; 1xOxidation [M23]; 2xPhospho [T2(78.1); S3(78.1)]	PBANKA_041550 2xPhospho [T961(78.1); S962(78.1)]	1	12	PBANKA_041550	beta subunit of coatomer complex, putative (SEC27)	PBANKA_041550 [960-983]	1	3563.62	T2(Phospho): 78.11; S3(Phospho): 78.11	48.1	117.8	108.2	106.6	93.4	121.4	101.2	103.4	6.2	15.3	14	13.8	12.1	15.7	13.1	13.4	3.4	9.3	9.1	9.7	12.1	13.6	12.7	10.4	1	1	1	1	1	1	1	1	2.97145	High	2.12637	0.0004607	0.002018	35.21	2.12637
[R].NNNSDEEEIAIPIHR.[K]	1xTMT6plex [N-Term]; 1xPhospho [S4(100)]	PBANKA_132130 1xPhospho [S149(100)]	1	2	PBANKA_132130	conserved Plasmodium protein, unknown function	PBANKA_132130 [146-160]	0	2059.96	S4(Phospho): 100	79.8	136	95.5	117.2	83.5	112.9	85	90.1	13	22.1	15.6	19.1	13.6	18.4	13.8	14.7	7.1	13.5	10.1	13.4	13.6	15.9	13.4	11.4	1	1	1	1	1	1	1	1	5.3731	High	-0.460989	0	2.173e-08	56.93	-0.460989
[K].HSGDEEDYTYENDDNYR.[K]	1xTMT6plex [N-Term]; 1xPhospho [S2(100)]	PBANKA_144550 1xPhospho [S351(100)]	1	2	PBANKA_144550	conserved Plasmodium protein, unknown function	PBANKA_144550 [350-366]	0	2430.92	S2(Phospho): 100	112.8	115.8	38.4	101.5	116.9	114.4	94.3	106	16.3	16.7	5.5	14.7	16.9	16.5	13.6	15.3	8.9	10.2	3.6	10.3	16.9	14.3	13.2	11.9	1	1	1	1	1	1	1	1	3.45892	High	1.29011	3.638e-05	0.000175	20.49	1.29011
[R].NNNNKNNNNNNNNNNNNNK.[N]	3xTMT6plex [N-Term; K5; K19]; 7xDeamidated [N2; N3; N4; N6; N7; N8; N9]		1	1	PBANKA_090670	conserved Plasmodium protein, unknown function	PBANKA_090670 [1350-1368]	1	2908.31		48.6	74	83.8	117.1	110.1	112	117.8	136.6	3.7	5.6	6.3	8.8	8.3	8.4	8.9	10.3	2	3.4	4.1	6.2	8.3	7.3	8.6	8	1	1	1	1	1	1	1	1						22.82	1.56439
[K].DNKSDEDNELEHEQK.[K]	3xTMT6plex [N-Term; K3; K15]; 1xPhospho [S4(100)]	PBANKA_040620 1xPhospho [S1667(100)]	1	2	PBANKA_040620	conserved Plasmodium protein, unknown function	PBANKA_040620 [1664-1678]	1	2597.23		90.3	93	86.6	161.6	94.6	100.3	104.7	68.9	94.1	96.9	90.3	168.4	98.6	104.5	109.1	71.8	51.4	59.1	58.6	118.3	98.6	90.4	105.7	55.8	1	1	1	1	1	1	1	1	4.61149	High	1.31978	0.0006213	0.002869	21.64	1.31978
[R].ALDINDLNSNTSR.[N]	1xTMT6plex [N-Term]; 1xPhospho [T11(90.2)]	PBANKA_040890 1xPhospho [T714(90.7)]	1	2	PBANKA_040890	conserved Plasmodium protein, unknown function	PBANKA_040890 [704-716]	0	1741.83	T11(Phospho): 90.67	120.6	163.8	98.9	151.4	67.5	83	47.4	67.4	22.3	30.3	18.3	28.1	12.5	15.4	8.8	12.5	12.2	18.5	11.9	19.7	12.5	13.3	8.5	9.7	1	1	1	1	1	1	1	1	1.28851	High	-1.24262	0.005755	0.05174
[K].SIEYQSSITIDK.[S]	2xTMT6plex [N-Term; K12]; 1xPhospho [Y/S/T]		1	4	PBANKA_135680	conserved Plasmodium protein, unknown function	PBANKA_135680 [4614-4625]	0	1921.99	Y4(Phospho): 47.51; S6(Phospho): 47.51	55.7	109.6	94.9	106.7	97.2	128.7	108.8	98.4	7.5	14.8	12.8	14.4	13.1	17.3	14.7	13.3	4.1	9	8.3	10.1	13.1	15	14.2	10.3	1	1	1	1	1	1	1	1	2.45288	High	-4.98136	0.0004851	0.002198	31.99	-4.98136
[R].DSAPTQSVDSEIEMNEINETK.[V]	2xTMT6plex [N-Term; K21]; 1xOxidation [M14]; 2xPhospho [T5(78.1); S7(78.1)]	PBANKA_010840 2xPhospho [T1508; S1510]	1	1	PBANKA_010840	conserved Plasmodium protein, unknown function	PBANKA_010840 [1504-1524]	0	2971.29	T5(Phospho): 78.14; S7(Phospho): 78.14	64.4	96.2	78.3	108.5	123.1	83.6	155.4	90.6	3.3	4.9	4	5.6	6.3	4.3	8	4.6	1.8	3	2.6	3.9	6.3	3.7	7.7	3.6	1	1	1	1	1	1	1	1	1.07859	Medium	-2.47647	0.03469	0.3347	29.14	-2.47647
[K].NEKSDISIDDK.[N]	3xTMT6plex [N-Term; K3; K11]; 2xPhospho [S4(100); S7(100)]	PBANKA_133090 2xPhospho [S79(100); S82(100)]	1	2	PBANKA_133090	conserved Plasmodium protein, unknown function	PBANKA_133090 [76-86]	1	2111.03	S4(Phospho): 100; S7(Phospho): 100	89.9	108.5	90.2	150.5	104.5	99.3	100.6	56.6	81.7	98.6	81.9	136.7	94.9	90.2	91.4	51.4	44.6	60.1	53.2	96	94.9	78	88.5	39.9	2	2	2	2	2	2	2	2	2.10883	High	0.404084	0.004499	0.03784	21.43	0.404084
[K].ASTQSTESGNNQNNINENNTVEK.[N]	2xTMT6plex [N-Term; K23]		1	2	PBANKA_135930	conserved Plasmodium protein, unknown function	PBANKA_135930 [1539-1561]	0	2951.43		127.2	155.7	67.8	125.3	105.3	120.5	49	49.2	11	13.5	5.9	10.8	9.1	10.4	4.2	4.2	6	8.2	3.8	7.6	9.1	9	4.1	3.3	1	1	1	1	1	1	1	1	2.7432	High	1.14753	0	7.886e-06	44.85	1.14753
[R].EELIQSNSITSEK.[N]	2xTMT6plex [N-Term; K13]; 1xDeamidated [N/Q]; 1xPhospho [S6(91.9)]	PBANKA_060090 1xPhospho [S53(91.9)]	1	8	PBANKA_060090	conserved Plasmodium protein, unknown function	PBANKA_060090 [48-60]	0	2017.01	S6(Phospho): 91.91	110.3	144.3	105.6	166.2	87.1	76	73.6	37	11.9	15.6	11.4	17.9	9.4	8.2	8	4	6.5	9.5	7.4	12.6	9.4	7.1	7.7	3.1	1	1	1	1	1	1	1	1	2.00959	High	10.0469	0.0009266	0.006977	24.1	10.0469
[K].LTDNEETQK.[H]	2xTMT6plex [N-Term; K9]; 1xPhospho [T2(100)]	PBANKA_131030 1xPhospho [T633(100)]	1	2	PBANKA_131030	conserved Plasmodium protein, unknown function, fragment	PBANKA_131030 [632-640]	0	1615.8		80.3	88.8	104.5	176.4	83.5	103.1	104.7	58.9	21.1	23.3	27.4	46.3	21.9	27.1	27.5	15.5	11.5	14.2	17.8	32.5	21.9	23.4	26.6	12	1	1	1	1	1	1	1	1	3.22519	High	0.23594	0.0004851	0.002246	23.21	0.23594
[K].ENTDNENFSITK.[Y]	2xTMT6plex [N-Term; K12]; 1xPhospho [T3(100)]	PBANKA_146370 1xPhospho [T1245(100)]	1	4	PBANKA_146370	DNA repair protein rhp16, putative	PBANKA_146370 [1243-1254]	0	1949.93	T3(Phospho): 100	76.7	99.3	87.9	136.8	98.6	118.6	111.3	70.7	61.7	79.9	70.7	110.1	79.3	95.4	89.5	56.9	33.7	48.7	45.9	77.3	79.3	82.5	86.7	44.2	2	2	2	2	2	2	2	2	3.2767	High	0.678898	5.957e-05	0.0003561	49.2	0.678898
[K].HKQTDSINDNSSK.[T]	3xTMT6plex [N-Term; K2; K13]; 2xPhospho [T4(100); S]	PBANKA_083120 2xPhospho [T864; S866]	1	2	PBANKA_083120	diacylglycerol kinase, putative	PBANKA_083120 [861-873]	1	2321.11		64.6	93.6	84	119.5	95.7	112.1	102.3	128.1	15.4	22.3	20	28.5	22.8	26.7	24.4	30.5	8.4	13.6	13	20	22.8	23.1	23.6	23.7	1	1	1	1	1	1	1	1	2.02097	Low	1.31306	0.5865	1	22.17	1.31306
[K].NETSDDNTIIK.[N]	2xTMT6plex [N-Term; K11]; 1xPhospho [T/S]	PBANKA_103410 1xPhospho [S991(79.3)]	1	2	PBANKA_103410	DNA repair helicase, putative	PBANKA_103410 [988-998]	0	1787.88	S4(Phospho): 79.27	93.5	109.1	76.5	134.8	101.6	108.4	104	72	40.5	47.2	33.1	58.4	44	46.9	45	31.2	22.1	28.8	21.5	41	44	40.6	43.6	24.2	1	1	1	1	1	1	1	1	1.8819	High	-2.8597	0.00724	0.06159	24.67	-2.8597
[R].ENDSNYGK.[D]	2xTMT6plex [N-Term; K8]; 1xPhospho [S/Y]	PBANKA_144550 1xPhospho [Y274(93.5)]	1	3	PBANKA_144550	conserved Plasmodium protein, unknown function	PBANKA_144550 [269-276]	0	1464.68		94.8	114.1	91.6	153.1	80.8	107.5	89.8	68.4	61.7	74.3	59.6	99.7	52.6	70	58.4	44.5	33.7	45.3	38.7	70	52.6	60.5	56.6	34.6	2	2	2	2	2	2	2	2	1.99343	High	0.0476256	0.003664	0.02935	26.93	0.0476256
[R].IESASYNNK.[H]	2xTMT6plex [N-Term; K9]; 1xPhospho [Y/S]	PBANKA_131920 1xPhospho [S838(100)]	1	3	PBANKA_131920	AP-1 complex subunit gamma, putative	PBANKA_131920 [836-844]	0	1563.78		117.2	163.1	110.5	163.7	72.8	62.3	60.9	49.5	207.7	288.9	195.8	289.9	128.9	110.4	107.9	87.7	113.4	176.1	127.1	203.6	128.9	95.5	104.5	68.1	1	1	1	1	1	1	1	1	3.29536	High	0.949611	0.0006943	0.003697	28.43	0.949611
[K].NHDDNNSGNINTGNSGGSSDISR.[A]	1xTMT6plex [N-Term]; 1xDeamidated [N]		1	10	PBANKA_040140	conserved Plasmodium protein, unknown function	PBANKA_040140 [220-242]	0	2562.13		66.8	66.7	82.9	148.1	101	88.5	125.9	120.1	11.2	11.2	13.9	24.8	16.9	14.8	21.1	20.1	6.1	6.8	9	17.4	16.9	12.8	20.4	15.6	2	2	2	2	2	2	2	2	6.08507	High	-0.347116	0	1.113e-09	78.2	-0.347116
[K].NQVETSENNNDVENR.[I]	1xTMT6plex [N-Term]		1	6	PBANKA_072000	conserved Plasmodium protein, unknown function	PBANKA_072000 [274-288]	0	1990.93		62.6	99.1	80.1	105.4	99.7	115.1	119	119.1	26.7	42.3	34.2	45	42.6	49.1	50.8	50.9	14.6	25.8	22.2	31.6	42.6	42.5	49.2	39.5	3	3	3	3	3	3	3	3	5.11786	High	1.50702	0	6.202e-08	102.45	1.50702
[K].LQNMHSNNNSNYSDEK.[K]	2xTMT6plex [N-Term; K16]; 1xDeamidated [N]; 1xOxidation [M4]; 1xPhospho [S13(78.1)]	PBANKA_130630 1xPhospho [S939]	1	4	PBANKA_130630	conserved Plasmodium protein, unknown function	PBANKA_130630 [927-942]	0	2450.07	S13(Phospho): 78.07	64.1	123.6	89.1	95.8	107.6	102.7	92.6	124.7	14.3	27.6	19.9	21.4	24	22.9	20.7	27.8	7.8	16.8	12.9	15	24	19.8	20	21.6	1	1	1	1	1	1	1	1	1.24916	Medium	8.46946	0.01138	0.1091	20.93	8.46946
[K].NTNNASIINQR.[N]	1xTMT6plex [N-Term]; 1xPhospho [T/S]	PBANKA_132790 1xPhospho [S1736(100)]	1	2	PBANKA_132790	conserved Plasmodium protein, unknown function	PBANKA_132790 [1731-1741]	0	1553.76		53	104.2	90.4	100.8	103.7	89.3	139.5	119.1	6.6	13	11.2	12.5	12.9	11.1	17.3	14.8	3.6	7.9	7.3	8.8	12.9	9.6	16.8	11.5	1	1	1	1	1	1	1	1	3.75759	High	0.0858348	0	6.4e-05	47.55	0.0858348
[K].EYTYDTDDNSDKEKQSDEENK.[S]	4xTMT6plex [N-Term; K12; K14; K21]; 3xPhospho [S16(91.8); Y/T/S]	PBANKA_140440 3xPhospho [S174(91.8); Y/T/S]	1	1	PBANKA_140440	conserved Plasmodium protein, unknown function	PBANKA_140440 [159-179]	2	3709.59	Y4(Phospho): 59.52; T6(Phospho): 59.29; S16(Phospho): 91.79	84.8	97	88.8	151.4	90.2	120.9	100.8	66.1	28.4	32.5	29.7	50.7	30.2	40.5	33.8	22.1	15.5	19.8	19.3	35.6	30.2	35	32.7	17.2	1	1	1	1	1	1	1	1	2.51449	High	-0.139894	0.003165	0.02623
[R].RNNDFEEFENEEESEDEK.[I]	2xTMT6plex [N-Term; K18]; 1xPhospho [S14(100)]	PBANKA_110460 1xPhospho [S285(100)]	1	2	PBANKA_110460	conserved Plasmodium protein, unknown function	PBANKA_110460 [272-289]	1	2827.2		79.2	146	101.8	113.2	80.7	119.1	97.8	62.2	12.5	23	16	17.8	12.7	18.7	15.4	9.8	6.8	14	10.4	12.5	12.7	16.2	14.9	7.6	1	1	1	1	1	1	1	1	2.85906	High	-1.87114	0.0003171	0.001364	30.85	-1.87114
[R].QNQTFNTIPNDVNSNDENELSYNQNR.[N]	1xTMT6plex [N-Term]; 1xPhospho [T/S/Y]; 2xDeamidated [N18; N23]		1	2	PBANKA_021220	conserved Plasmodium protein, unknown function	PBANKA_021220 [2342-2367]	0	3379.45		81.5	137.6	56.8	61.5	105.5	129.3	111.6	116.2	6.4	10.8	4.5	4.8	8.3	10.2	8.8	9.1	3.5	6.6	2.9	3.4	8.3	8.8	8.5	7.1	1	1	1	1	1	1	1	1	3.31161	High	9.9105	5.957e-05	0.0002405	27.17	9.9105
[K].DIGASNNYSQNIDK.[Q]	2xTMT6plex [N-Term; K14]; 1xPhospho [S5(100)]	PBANKA_123650 1xPhospho [S653(100)]	1	8	PBANKA_123650	conserved Plasmodium protein, unknown function, fragment	PBANKA_123650 [649-662]	0	2077		117.4	167.6	119.1	170.8	56.1	60.8	51.6	56.5	90.7	129.4	92	131.9	43.3	46.9	39.9	43.6	49.5	78.9	59.7	92.6	43.3	40.6	38.6	33.9	2	2	2	2	2	2	2	2	3.36353	High	1.11866	5.957e-05	0.0002888	46.55	0.854183
[R].MSTNVENK.[T]	2xTMT6plex [N-Term; K8]; 1xOxidation [M1]; 1xPhospho [T/S]	PBANKA_142080 1xPhospho [T1149]	1	1	PBANKA_142080	conserved Plasmodium protein, unknown function	PBANKA_142080 [1147-1154]	0	1476.72	S2(Phospho): 50; T3(Phospho): 50	137.3	204.2	127.5	175.4	26.1	46.7	21.5	61.3	21.1	31.3	19.6	26.9	4	7.2	3.3	9.4	11.5	19.1	12.7	18.9	4	6.2	3.2	7.3	1	1	1	1	1	1	1	1	1.38413	Medium	0.330189	0.0377	0.3613	18.45	0.341749
[K].GNEDENSEDELLYEQAEIDDNENNNDKHTEIEK.[G]	3xTMT6plex [N-Term; K27; K33]; 2xDeamidated [N]; 1xPhospho [S7(93.1)]	PBANKA_041170 1xPhospho [S251(93.1)]	1	3	PBANKA_041170	co-chaperone p23, putative	PBANKA_041170 [245-277]	1	4662.06	S7(Phospho): 93.12	74	148.5	75.1	63.5	48.8	174	112.2	104	5.3	10.7	5.4	4.6	3.5	12.5	8.1	7.5	2.9	6.5	3.5	3.2	3.5	10.8	7.8	5.8	1	1	1	1	1	1	1	1	2.2605	High	4.34873	0.003188	0.02658
[K].DVLSANSNIQVGGYDK.[K]	2xTMT6plex [N-Term; K16]; 1xDeamidated [N/Q]; 1xPhospho [S7(98.7)]	PBANKA_130130 1xPhospho [S241(98.7)]	1	4	PBANKA_130130	trailer hitch homolog, putative (CITH)	PBANKA_130130 [235-250]	0	2219.1	S7(Phospho): 98.7	75.2	132.7	63.2	63.6	102.6	134	124.6	104.1	6.2	11	5.2	5.3	8.5	11.1	10.3	8.6	3.4	6.7	3.4	3.7	8.5	9.6	10	6.7	1	1	1	1	1	1	1	1	2.02344	High	2.69062	0.0002581	0.001154	27.7	2.69062
[R].SLGEGQDNNFSDR.[E]	1xTMT6plex [N-Term]; 1xDeamidated [N/Q]; 1xPhospho [S1(100)]	PBANKA_120270 1xPhospho [S576(100)]	1	4	PBANKA_120270	RNA-binding protein, putative	PBANKA_120270 [576-588]	0	1748.73	S1(Phospho): 100	73.1	143.8	106.5	112.3	89.6	93.5	108.6	72.7	7.5	14.8	10.9	11.5	9.2	9.6	11.2	7.5	4.1	9	7.1	8.1	9.2	8.3	10.8	5.8	1	1	1	1	1	1	1	1	2.55548	High	0.124655	0.0002581	0.001119	37.53	0.124655
[R].SIDNATK.[T]	2xTMT6plex [N-Term; K7]; 1xPhospho [S1(100)]	PBANKA_092770 1xPhospho [S1151(100)]	1	2	PBANKA_092770	conserved Plasmodium protein, unknown function	PBANKA_092770 [1151-1157]	0	1286.68	S1(Phospho): 100	112.8	148.3	114.5	176.3	61.1	63.4	60.1	63.6	124.7	164	126.6	194.9	67.6	70.1	66.5	70.3	68.1	100	82.2	136.9	67.6	60.6	64.4	54.6	2	2	2	2	2	2	2	2	2.23021	High	0.437639	0.008269	0.0724	18.82	0.627385
[R].AYSESLGLITDELR.[K]	1xTMT6plex [N-Term]; 1xPhospho [S3(87.9)]	PBANKA_122410 1xPhospho [S7(98.3)]	1	4	PBANKA_122410	kinesin-like protein, putative	PBANKA_122410 [5-18]	0	1875.93	S3(Phospho): 87.93	57	121.9	90.5	88.6	78.6	138.9	118.7	105.7	6.6	14.1	10.5	10.3	9.1	16.1	13.7	12.2	3.6	8.6	6.8	7.2	9.1	13.9	13.3	9.5	1	1	1	1	1	1	1	1	3.49407	High	0.634174	5.957e-05	0.0002821	47.96	-3.91369
[K].VDILTQEMHNR.[L]	1xTMT6plex [N-Term]; 1xOxidation [M8]		1	2	PBANKA_133190	eukaryotic initiation factor 4a, putative (eIF4A)	PBANKA_133190 [275-285]	0	1600.83		131	99.7	74.4	193.5	60.8	76.5	72	92.1	7.3	5.6	4.2	10.8	3.4	4.3	4	5.2	4	3.4	2.7	7.6	3.4	3.7	3.9	4	1	1	1	1	1	1	1	1	1.87557	High	0.304075	0.0006943	0.003346	30.03	0.304075
[R].SRSIIER.[E]	1xTMT6plex [N-Term]; 1xPhospho [S3(99.8)]	PBANKA_130400 1xPhospho [S19(99.8)]	1	1	PBANKA_130400	conserved Plasmodium protein, unknown function	PBANKA_130400 [17-23]	1	1169.62	S3(Phospho): 99.84	115.7	171.6	142.9	196.7	56.7	41.6	34.1	40.7	23.4	34.8	29	39.9	11.5	8.4	6.9	8.2	12.8	21.2	18.8	28	11.5	7.3	6.7	6.4	1	1	1	1	1	1	1	1	2.18563	High	-0.665703	0.005553	0.04883	17.75	-0.665703
[K].LEGYVNNCNTIYDTTSHYENNIK.[N]	2xTMT6plex [N-Term; K23]; 2xDeamidated [N20; N21]; 1xCarbamidomethyl [C8]; 2xPhospho [T/Y/S]		1	2	PBANKA_121290	conserved Plasmodium protein, unknown function	PBANKA_121290 [1047-1069]	0	3382.46	T10(Phospho): 59.86; Y12(Phospho): 40.65	46.3	97.6	107.7	121.8	87.8	109.3	126	103.5	6.2	13.1	14.5	16.4	11.8	14.7	16.9	13.9	3.4	8	9.4	11.5	11.8	12.7	16.4	10.8	1	1	1	1	1	1	1	1	1.88982	High	0.644441	0.00813	0.07049
[R].SDSKILDDEDIDNYNDDDTGLDK.[F]	3xTMT6plex [N-Term; K4; K23]; 1xPhospho [S/Y/T]; 1xDeamidated [N]		1	4	PBANKA_140250	conserved Plasmodium protein, unknown function	PBANKA_140250 [357-379]	1	3383.55		109.2	174.6	121.3	153.9	69.2	59.1	70.9	41.8	20.5	32.8	22.8	28.9	13	11.1	13.3	7.9	11.2	20	14.8	20.3	13	9.6	12.9	6.1	1	1	1	1	1	1	1	1	2.42575	High	4.43895	0.001396	0.01078	28.01	4.43895
[K].NAEIENLNEQILSDNTNENLK.[N]	2xTMT6plex [N-Term; K21]; 2xPhospho [S13(100); T16]; 2xDeamidated [N8; Q/N]	PBANKA_111520 2xPhospho [S43(100); T46(100)]	1	2	PBANKA_111520	conserved Plasmodium protein, unknown function	PBANKA_111520 [31-51]	0	3035.39		87.4	55.9	56.7	149.6	132.3	132.5	138	47.4	6.4	4.1	4.2	11	9.7	9.7	10.1	3.5	3.5	2.5	2.7	7.7	9.7	8.4	9.8	2.7	1	1	1	1	1	1	1	1	2.75145	High	11.7926	5.957e-05	0.0002927	34.79	11.7926
[K].NEDNNNILNQASNTTSQEIEK.[K]	2xTMT6plex [N-Term; K21]; 1xPhospho [T/S]; 1xDeamidated [Q/N]		1	10	PBANKA_051650	conserved Plasmodium protein, unknown function	PBANKA_051650 [89-109]	0	2915.37		117.2	109.6	47.2	124.2	91.8	115.9	93.9	100.3	12.6	11.8	5.1	13.4	9.9	12.5	10.1	10.8	6.9	7.2	3.3	9.4	9.9	10.8	9.8	8.4	1	1	1	1	1	1	1	1	2.32191	High	2.06754	8.7e-05	0.0004596	32.69	2.06754
[-].MDLSDEDEIDIDEILK.[Q]	1xPhospho [S4]; 1xTMT6plex [K16]; 1xAcetyl [N-Term]; 1xOxidation [M1]	PBANKA_091010 1xPhospho [S4]; 1xAcetyl [N-Term]	1	2	PBANKA_091010	beta-catenin-like protein 1, putative	PBANKA_091010 [1-16]	0	2260		94.7	127.2	73.5	113.2	79.5	94.3	30.8	186.9	4.8	6.4	3.7	5.7	4	4.7	1.5	9.4	2.6	3.9	2.4	4	4	4.1	1.5	7.3	1	1	1	1	1	1	1	1						59.76	1.45022
[K].SQNEDNTIILSSTSPQNSNALSK.[K]	2xTMT6plex [N-Term; K23]; 1xPhospho [S/T]; 2xDeamidated [N/Q]		1	54	PBANKA_100580	conserved Plasmodium protein, unknown function	PBANKA_100580 [195-217]	0	2988.45		67.4	95.6	72.3	103.6	96.5	114.6	126	123.9	23.3	33	25	35.7	33.3	39.5	43.5	42.7	12.7	20.1	16.2	25.1	33.3	34.2	42.1	33.2	4	4	4	4	4	4	4	4	4.23399	High	6.49382	0	3.718e-07	49.17	7.29484
[M].SLNFSDDDIYENK.[G]	1xPhospho [S]; 1xTMT6plex [K13]; 1xAcetyl [N-Term]	PBANKA_050540 1xPhospho [S]; 1xAcetyl [N-Term]	1	2	PBANKA_050540	conserved Plasmodium protein, unknown function	PBANKA_050540 [2-14]	0	1910.83		108.3	116.2	70.9	138.3	82.5	125	95.8	63	14.8	15.9	9.7	18.9	11.3	17.1	13.1	8.6	8.1	9.7	6.3	13.3	11.3	14.8	12.7	6.7	1	1	1	1	1	1	1	1						41.95	1.09517
[K].LNEFETSEIDEEGSNDDSFLDDEYVR.[S]	1xTMT6plex [N-Term]; 1xDeamidated [N15]; 1xPhospho [Y/S/T]		1	35	PBANKA_092540	dynein heavy chain, putative	PBANKA_092540 [155-180]	0	3377.39	T6(Phospho): 33.3; S7(Phospho): 33.3; S14(Phospho): 33.3	35	48.6	24.3	35.4	54.5	65.2	89.4	447.5	7.3	10.2	5.1	7.4	11.4	13.6	18.7	93.6	4	6.2	3.3	5.2	11.4	11.8	18.1	72.7	2	2	1	2	2	2	2	2	5.63438	High	6.15457	0	1.363e-09	99.2	6.15457
[R].TTSYNSNDNNK.[D]	2xTMT6plex [N-Term; K11]; 1xPhospho [S6(86.9)]	PBANKA_071280 1xPhospho [S251(86.9)]	1	2	PBANKA_071280	conserved protein, unknown function	PBANKA_071280 [246-256]	0	1795.83	S6(Phospho): 86.89	67.1	96.9	91.6	128.4	74.4	95.2	105.3	141	17	24.6	23.3	32.6	18.9	24.2	26.7	35.8	9.3	15	15.1	22.9	18.9	20.9	25.9	27.8	1	1	1	1	1	1	1	1	2.06639	High	0.133395	0.000822	0.00529	13.27	0.133395
[K].NENEDEEDVDEEEDEESGDDEYNNYSEK.[N]	2xTMT6plex [N-Term; K28]; 1xPhospho [S17(84.4)]	PBANKA_112350 1xPhospho [S892(84.4)]	1	5	PBANKA_112350	SNF2 helicase, putative (ISWI)	PBANKA_112350 [876-903]	0	3907.49	S17(Phospho): 84.4	74.5	111.8	82.4	110.9	93.3	82	110.9	134.1	32.1	48.1	35.4	47.7	40.1	35.3	47.7	57.7	17.5	29.3	23	33.5	40.1	30.5	46.2	44.8	2	2	2	2	2	2	2	2	3.61025	High	1.11611	0	2.052e-06	58.23	1.60378
[K].YEAVNNTNQNTENDNNK.[M]	2xTMT6plex [N-Term; K17]; 1xDeamidated [N/Q]		1	7	PBANKA_144230	conserved Plasmodium protein, unknown function	PBANKA_144230 [197-213]	0	2441.16		82.8	115.8	76.9	110.6	102.2	112.1	114.7	84.9	17.6	24.6	16.3	23.5	21.7	23.8	24.4	18	9.6	15	10.6	16.5	21.7	20.6	23.6	14	1	1	1	1	1	1	1	1	1.6044	High	10.8593	0.0063	0.05602	28.11	10.8593
[R].SLLSSNDNIVQNYTHENYTDEK.[L]	2xTMT6plex [N-Term; K22]; 1xPhospho [Y/S/T]	PBANKA_112650 1xPhospho [T861(85.2)]	1	2	PBANKA_112650	acetyl-CoA synthetase, putative (ACS)	PBANKA_112650 [848-869]	0	3122.47		80.1	137.3	93.8	109.3	95.3	87.7	91.7	104.8	17.2	29.5	20.2	23.5	20.5	18.8	19.7	22.5	9.4	18	13.1	16.5	20.5	16.3	19.1	17.5	1	1	1	1	1	1	1	1	1.64392	High	-3.66057	0.004123	0.03454	14.91	-3.66057
[K].ENINDHENTDNNYSNGYIEGLK.[K]	2xTMT6plex [N-Term; K22]; 2xDeamidated [N12; N]; 1xPhospho [T/Y/S]		1	8	PBANKA_142010	conserved Plasmodium protein, unknown function	PBANKA_142010 [774-795]	0	3093.37	T9(Phospho): 25; Y13(Phospho): 25; S14(Phospho): 25; Y17(Phospho): 25	58.1	119.8	90.5	90.4	123.8	99.1	113.1	105.2	7.3	15.1	11.4	11.4	15.6	12.5	14.2	13.3	4	9.2	7.4	8	15.6	10.8	13.8	10.3	1	1	1	1	1	1	1	1	2.187	High	2.76189	0.0001278	0.0007076	34.42	2.76189
[K].TPDEYSPKDDR.[D]	2xTMT6plex [N-Term; K8]; 1xPhospho [Y/S/T]	PBANKA_120270 1xPhospho [S698(92.4)]	1	2	PBANKA_120270	RNA-binding protein, putative	PBANKA_120270 [693-703]	1	1860.88	Y5(Phospho): 50; S6(Phospho): 50	79.8	98	101	157.9	90.2	108.6	113.6	51	124.7	153.2	157.9	246.9	141.1	169.9	177.7	79.7	68.1	93.4	102.5	173.4	141.1	146.9	172.1	61.9	2	2	2	2	2	2	2	2	3.04936	High	0.519939	0.002541	0.02095	9.39	0.519939
[K].ESENENTEK.[G]	2xTMT6plex [N-Term; K9]; 1xPhospho [S2(100)]	PBANKA_112530 1xPhospho [S115(100)]	1	4	PBANKA_112530	conserved Plasmodium protein, unknown function	PBANKA_112530 [114-122]	0	1617.74	S2(Phospho): 100	80.8	88.8	82.9	142.9	112.8	103.2	125.1	63.5	83.7	92	85.9	148.1	116.9	107	129.7	65.8	45.7	56.1	55.8	104	116.9	92.5	125.6	51.1	2	2	2	2	2	2	2	2	3.65336	High	0.268486	5.957e-05	0.0003334	32.6	0.20134
[K].QQINDEEDDELNQYSDDEDEEDDEENDEDNYNSNR.[G]	1xTMT6plex [N-Term]; 1xPhospho [Y/S]		1	28	PBANKA_131100	conserved Plasmodium protein, unknown function (UIS21)	PBANKA_131100 [321-355]	0	4590.69	Y14(Phospho): 49.79; S15(Phospho): 49.79	66.1	72.2	66	115.7	136.5	117.4	120	106	5.9	6.4	5.9	10.3	12.1	10.4	10.6	9.4	3.2	3.9	3.8	7.2	12.1	9	10.3	7.3	1	1	1	1	1	1	1	1	4.49087	High	0.508709	0	3.712e-08	88.42	1.04053
[R].ETNNTSINSDYSNYDPK.[T]	2xTMT6plex [N-Term; K17]; 2xPhospho [Y/S/T]		1	5	PBANKA_122760	adenylyl cyclase beta, putative (ACbeta)	PBANKA_122760 [1475-1491]	0	2580.09		82.8	131.5	66.3	79.7	102.2	114.5	84.5	138.6	15.4	24.4	12.3	14.8	19	21.3	15.7	25.8	8.4	14.9	8	10.4	19	18.4	15.2	20	1	1	1	1	1	1	1	1	2.43157	High	-0.563756	5.957e-05	0.0002441	30.52	-0.563756
[K].GFYNVENEQNIEDQSQYR.[N]	1xTMT6plex [N-Term]; 1xPhospho [S15(88.2)]	PBANKA_051740 1xPhospho [S236(88.2)]	1	4	PBANKA_051740	myb2 transcription factor, putative (Myb2)	PBANKA_051740 [222-239]	0	2542.11	S15(Phospho): 88.25		113.5	68.1	76.6	163.4	82.2	113.1	183.1		5.9	3.5	4	8.5	4.3	5.9	9.5		3.6	2.3	2.8	8.5	3.7	5.7	7.4		1	1	1	1	1	1	1	2.119	High	-0.215585	0.0006213	0.002795	25.09	-0.215585
[R].ENDTANDSENISNNIQITNNPLNEDR.[N]	1xTMT6plex [N-Term]; 1xPhospho [T/S]		1	3	PBANKA_070450	E3 ubiquitin-protein ligase, putative	PBANKA_070450 [2791-2816]	0	3253.44			86.1	61.4	86.7	159.5	167.5	149.6	89.2		4.1	2.9	4.1	7.6	8	7.1	4.2		2.5	1.9	2.9	7.6	6.9	6.9	3.3		1	1	1	1	1	1	1	1.63139	High	-0.91812	0.000861	0.005791	19.01	-0.91812
[R].MTNYVNYGAK.[I]	2xTMT6plex [N-Term; K10]; 1xOxidation [M1]		1	2	PBANKA_142330	DNA/RNA-binding protein Alba 1, putative (ALBA1)	PBANKA_142330 [21-30]	0	1634.86		92.7	143.6	89.2	113.9	113.6	88.3	70.2	88.6	33.2	51.3	31.9	40.7	40.6	31.6	25.1	31.7	18.1	31.3	20.7	28.6	40.6	27.3	24.3	24.6	1	1	1	1	1	1	1	1	2.52293	High	-2.61888	0.0003692	0.001733	31.34	-2.61888
[R].EKEESDENESNHSENDDEEENEDDQNEEK.[K]	3xTMT6plex [N-Term; K2; K29]; 1xDeamidated [N15]; 3xPhospho [S5(100); S10(100); S13(100)]	PBANKA_091200 3xPhospho [S757(100); S762(100); S765(100)]	1	1	PBANKA_091200	conserved Plasmodium protein, unknown function	PBANKA_091200 [753-781]	1	4423.65	S5(Phospho): 100; S10(Phospho): 100; S13(Phospho): 100	77.3	166.2	156.1	163.5	65.9	78.1	64.5	28.3	4.6	9.8	9.2	9.7	3.9	4.6	3.8	1.7	2.5	6	6	6.8	3.9	4	3.7	1.3	1	1	1	1	1	1	1	1	2.73973	High	4.9329	0.004255	0.03599
[K].SYASDSTFTDVHTYDR.[N]	1xTMT6plex [N-Term]; 2xPhospho [S6(98.9); T7(98.9)]	PBANKA_135130 2xPhospho [S824(97.8); S826(98.9)]	1	8	PBANKA_135130	conserved Plasmodium protein, unknown function	PBANKA_135130 [821-836]	0	2253.89	S6(Phospho): 98.9; T7(Phospho): 98.9	84	107.6	79.1	122.8	96.8	87.5	98.5	123.5	18.3	23.5	17.3	26.8	21.1	19.1	21.5	26.9	10	14.3	11.2	18.8	21.1	16.5	20.8	20.9	1	1	1	1	1	1	1	1	4.04435	High	-0.618198	0	4.235e-06	65.27	-0.618198
[K].MPNESDGKEISENIMDR.[E]	2xTMT6plex [N-Term; K8]; 1xPhospho [S5(95.4)]; 2xOxidation [M1; M15]	PBANKA_141900 1xPhospho [S782(95.4)]	1	2	PBANKA_141900	conserved Plasmodium protein, unknown function	PBANKA_141900 [778-794]	1	2535.15		52	118.2	113.4	115.7	105	78	90.3	127.4	6.8	15.4	14.8	15.1	13.7	10.2	11.8	16.6	3.7	9.4	9.6	10.6	13.7	8.8	11.4	12.9	1	1	1	1	1	1	1	1	1.60859	High	-0.506586	0.003423	0.0279	25.17	-0.506586
[K].SDSNDIDK.[T]	2xTMT6plex [N-Term; K8]; 1xPhospho [S1(100)]	PBANKA_041610 1xPhospho [S1209(100)]	1	2	PBANKA_041610	dynein heavy chain, putative	PBANKA_041610 [1209-1216]	0	1431.68	S1(Phospho): 100	79	99.4	97.4	149.5	94.6	109.7	105.8	64.6	89.6	112.7	110.4	169.4	107.2	124.3	120	73.3	48.9	68.7	71.7	119	107.2	107.5	116.2	56.9	2	2	2	2	2	2	2	2	2.63777	High	-0.475708	0.005527	0.04849	12.29	-0.475708
[K].ALIEQENNNNNLEIIDSDKNVR.[K]	2xTMT6plex [N-Term; K19]; 1xPhospho [S17]; 1xDeamidated [N20]	PBANKA_090800 1xPhospho [S167]	1	1	PBANKA_090800	conserved Plasmodium protein, unknown function	PBANKA_090800 [151-172]	1	3094.55		68.4	109.6	84.7	106.3	119.9	86.3	73	151.8	3.5	5.6	4.3	5.4	6.1	4.4	3.7	7.7	1.9	3.4	2.8	3.8	6.1	3.8	3.6	6	1	1	1	1	1	1	1	1						16.96	4.33547
[K].IETNSLNNNASQNNQNNYLNK.[Q]	2xTMT6plex [N-Term; K21]; 1xPhospho [T/S/Y]; 1xDeamidated [Q/N]	PBANKA_051990 1xPhospho [S1421(94)]	1	8	PBANKA_051990	conserved Plasmodium protein, unknown function	PBANKA_051990 [1417-1437]	0	2946.4		108.2	133.4	47.3	86.3	85.2	117.1	110.9	111.6	14.1	17.4	6.2	11.2	11.1	15.3	14.5	14.5	7.7	10.6	4	7.9	11.1	13.2	14	11.3	1	1	1	1	1	1	1	1	1.74026	High	7.90285	0.005658	0.04974	23.05	7.90285
[K].DITDSISINNDEINSK.[L]	2xTMT6plex [N-Term; K16]; 1xDeamidated [N]; 2xPhospho [S5(85.2); S7(99.4)]	PBANKA_113610 2xPhospho [S175(85.2); S177(99.4)]	1	3	PBANKA_113610	conserved Plasmodium protein, unknown function	PBANKA_113610 [171-186]	0	2397.09	S5(Phospho): 85.19; S7(Phospho): 99.35	56.9	65.5	82	128.4	136	133.3	131.3	66.6	3.8	4.4	5.5	8.7	9.2	9	8.9	4.5	2.1	2.7	3.6	6.1	9.2	7.8	8.6	3.5	1	1	1	1	1	1	1	1	2.29478	High	10.7405	0.003115	0.02575	31.58	10.7405
[K].DGSIDNNEYK.[N]	2xTMT6plex [N-Term; K10]; 1xPhospho [S3(100)]	PBANKA_020880 1xPhospho [S469(100)]	1	2	PBANKA_020880	ubiquitin carboxyl-terminal hydrolase 1, putative (UBP1)	PBANKA_020880 [467-476]	0	1692.79		83.8	95.5	90.6	150.3	105.2	107.8	101.7	65.1	68	77.4	73.5	121.9	85.3	87.4	82.5	52.8	37.1	47.2	47.7	85.6	85.3	75.6	79.9	41	2	2	2	2	2	2	2	2	2.31435	High	1.96961	0.00554	0.04881	28.68	0.122813
[K].QNVESENMVENDQGMANELLQK.[R]	2xTMT6plex [N-Term; K22]; 1xPhospho [S5(100)]; 1xDeamidated [Q/N]; 2xOxidation [M8; M15]	PBANKA_010270 1xPhospho [S29(100)]	1	41	PBANKA_010270	conserved Plasmodium protein, unknown function	PBANKA_010270 [25-46]	0	3091.4		61.9	108.2	85.6	99.6	114.5	116.9	97.2	116	18.5	32.3	25.6	29.8	34.2	34.9	29	34.6	10.1	19.7	16.6	20.9	34.2	30.2	28.1	26.9	2	3	3	3	3	3	3	3	3.08686	High	5.64244	0	7.948e-05	41.89	5.64244
[K].DMSVFIDDSNFSDGNDHETK.[Y]	2xTMT6plex [N-Term; K20]; 2xDeamidated [N10; N15]; 1xOxidation [M2]; 1xPhospho [S12(77.7)]	PBANKA_061820 1xPhospho [S547(77.7)]	1	5	PBANKA_061820	phosphoinositide-binding protein, putative	PBANKA_061820 [536-555]	0	2829.19	S12(Phospho): 77.66	64	63	73.5	131	113	138.7	105.8	111	5.5	5.4	6.3	11.2	9.7	11.9	9.1	9.5	3	3.3	4.1	7.9	9.7	10.3	8.8	7.4	1	1	1	1	1	1	1	1	1.87144	High	4.67926	0.002742	0.02387	18.99	4.67926
[K].LELNPEGNAENNQTNENQDTNNEESEIK.[Y]	2xTMT6plex [N-Term; K28]		1	5	PBANKA_111860	cell division cycle protein 48 homologue, putative	PBANKA_111860 [715-742]	0	3645.72		78.9	97.4	89.4	139	105.9	111.6	109.8	67.9	57	70.4	64.5	100.4	76.5	80.6	79.3	49.1	31.1	42.9	41.9	70.5	76.5	69.7	76.8	38.1	3	3	3	3	3	3	3	3	5.00806	High	-2.28337	0	4.002e-08	56.81	-2.28337
[R].EVSDEITSISTSDINK.[V]	2xTMT6plex [N-Term; K16]; 1xDeamidated [N15]; 1xPhospho [S3(100)]	PBANKA_080120 1xPhospho [S386(100)]	1	3	PBANKA_080120	erythrocyte membrane-associated antigen, putative	PBANKA_080120 [384-399]	0	2277.12	S3(Phospho): 100	76.9	93.2	84.7	134.2	102.7	110.4	99.2	98.8	25.5	30.8	28	44.4	34	36.5	32.8	32.7	13.9	18.8	18.2	31.2	34	31.6	31.8	25.4	2	2	2	2	2	2	2	2	3.02257	High	6.45159	0.001735	0.01346	15.9	6.45159
[K].LDSNDVGDK.[K]	2xTMT6plex [N-Term; K9]; 1xPhospho [S3]	PBANKA_041790 1xPhospho [S784(100)]	1	3	PBANKA_041790	conserved Plasmodium protein, unknown function	PBANKA_041790 [782-790]	0	1500.73		144.7	188.9	125.2	190.4	34.4	42.3	36.4	37.7	261.7	341.7	226.4	344.3	62.3	76.6	65.8	68.1	142.9	208.3	147	241.8	62.3	66.2	63.7	52.9	2	2	2	2	2	2	2	2	3.03955	High	1.01838	0.0006378	0.003023	28.36	0.521381
[K].NSEKNGENNDENDDEDEQIK.[I]	3xTMT6plex [N-Term; K4; K20]; 1xPhospho [S2(100)]	PBANKA_144850 1xPhospho [S440(100)]	1	2	PBANKA_144850	sentrin-specific protease 1, putative (SENP1)	PBANKA_144850 [439-458]	1	3103.39	S2(Phospho): 100	77.5	111.5	90.9	125.3	95.9	106.7	102.2	90	49.3	70.9	57.8	79.6	60.9	67.8	65	57.2	26.9	43.2	37.5	55.9	60.9	58.6	62.9	44.4	2	2	2	2	2	2	2	2	2.42658	High	-1.02884	0.00271	0.02227	9.69	-1.02884
[K].TNSFNSTNENNNNEQNAQGEIK.[V]	2xTMT6plex [N-Term; K22]; 1xPhospho [T/S]; 2xDeamidated [N/Q]	PBANKA_130700 1xPhospho [S288(90.7)]	1	38	PBANKA_130700	conserved Plasmodium protein, unknown function	PBANKA_130700 [286-307]	0	3007.33		92.2	132	83	114	82.8	89.4	92.9	113.8	23.3	33.3	20.9	28.8	20.9	22.5	23.4	28.7	12.7	20.3	13.6	20.2	20.9	19.5	22.7	22.3	2	2	2	2	2	2	2	2	1.87409	High	9.26448	0.001939	0.01522	33.65	9.26448
[R].NLNSNTDEINTK.[E]	2xTMT6plex [N-Term; K12]; 1xPhospho [T/S]		1	9	PBANKA_090690	conserved Plasmodium protein, unknown function	PBANKA_090690 [1946-1957]	0	1900.94	T6(Phospho): 99.44	99.4	127.4	96.1	147.1	86	83.8	84.1	76.1	112.6	144.4	108.9	166.7	97.5	94.9	95.3	86.3	61.5	88	70.7	117.1	97.5	82.1	92.3	67	3	3	3	3	3	3	3	3	3.85518	High	2.04849	0	6.405e-05	55.13	2.04849
[K].LNTINLDNR.[K]	1xTMT6plex [N-Term]; 1xPhospho [T3]	PBANKA_060550 1xPhospho [T156(100)]	1	1	PBANKA_060550	conserved Plasmodium protein, unknown function	PBANKA_060550 [154-162]	0	1381.7		128.7	167.9	124.6	187.6	46.2	53.1	48.7	43.1	112.6	147	109	164.2	40.4	46.5	42.6	37.7	61.5	89.6	70.8	115.3	40.4	40.2	41.3	29.3	1	1	1	1	1	1	1	1	2.61466	High	-3.99562	0.005381	0.04687	14.3	-3.99562
[K].RGNADDNDNTTEQADNQNSNDK.[K]	2xTMT6plex [N-Term; K22]; 1xDeamidated [Q/N]		1	7	PBANKA_031230	conserved Plasmodium protein, unknown function	PBANKA_031230 [45-66]	1	2895.3		92.1	85.4	77.5	150.9	181.4	68.5	109.4	34.7	5.1	4.8	4.3	8.4	10.1	3.8	6.1	1.9	2.8	2.9	2.8	5.9	10.1	3.3	5.9	1.5	1	1	1	1	1	1	1	1	3.28707	High	7.78273	5.957e-05	0.0002633	57.2	7.78273
[R].DDESNNYVLDNDSNEELDK.[I]	2xTMT6plex [N-Term; K19]; 1xPhospho [S13(97.8)]	PBANKA_092640 1xPhospho [S246(85.4)]	1	8	PBANKA_092640	serine/threonine protein kinase, putative	PBANKA_092640 [234-252]	0	2766.2	S13(Phospho): 100	80	110.2	85.7	122.5	104.3	102.4	115.7	79.3	60.8	83.8	65.2	93.1	79.3	77.8	88	60.3	33.2	51.1	42.3	65.4	79.3	67.3	85.2	46.8	4	4	4	4	4	4	4	4	3.43396	High	-4.53457	0	2.94e-05	55.19	-4.53457
[R].NSNSENNNGNNNYNSTNNENTNDK.[S]	2xTMT6plex [N-Term; K24]		1	4	PBANKA_041490	dynein light intermediate chain 2, putative	PBANKA_041490 [652-675]	0	3144.39		105.6	86.5	66	154.8	61	129.5	62.9	133.6	6.4	5.2	4	9.4	3.7	7.9	3.8	8.1	3.5	3.2	2.6	6.6	3.7	6.8	3.7	6.3	1	1	1	1	1	1	1	1	2.16752	High	3.12651	0	9.506e-05	50	3.12651
[K].QNIDLIELNEDGNTNNNIDDSK.[Q]	2xTMT6plex [N-Term; K22]		1	4	PBANKA_124270	AP-1 complex subunit beta, putative	PBANKA_124270 [667-688]	0	2946.47		84.5	115.4	71.8	103.5	115.1	90.5	113.1	106.2	18.1	24.8	15.4	22.2	24.7	19.4	24.3	22.8	9.9	15.1	10	15.6	24.7	16.8	23.5	17.7	2	2	2	2	2	2	2	2	2.99769	High	1.28468	0	2.617e-05	38.66	0.750661
[K].GDISNEASVNEEYNNSNSGK.[N]	2xTMT6plex [N-Term; K20]; 1xPhospho [S/Y]	PBANKA_093900 1xPhospho [S736(98.9)]	1	3	PBANKA_093900	ion channel protein, putative	PBANKA_093900 [719-738]	0	2666.2		77.7	105.3	81.2	118.4	94.6	101.4	78.1	143.2	13.6	18.4	14.2	20.6	16.5	17.7	13.6	25	7.4	11.2	9.2	14.5	16.5	15.3	13.2	19.4	1	1	1	1	1	1	1	1	3.41978	High	2.75398	0	4.935e-05	54.81	2.75398
[K].NDDKKSGDEEESDK.[N]	4xTMT6plex [N-Term; K4; K5; K14]; 1xPhospho [S]	PBANKA_135920 1xPhospho [S98(100)]	1	1	PBANKA_135920	DNA/RNA-binding protein Alba 2, putative (ALBA2)	PBANKA_135920 [93-106]	2	2592.28	S6(Phospho): 100	92.7	117.7	98.7	150.5	98.4	105.4	94.7	42	71.1	90.2	75.6	115.3	75.4	80.8	72.6	32.2	38.8	55	49.1	81	75.4	69.9	70.3	25	1	1	1	1	1	1	1	1	3.00522	High	1.73283	0.003033	0.02557
[K].NPIAAVSNSRIDIDNEMPK.[W]	2xTMT6plex [N-Term; K19]; 1xDeamidated [N]; 1xOxidation [M17]; 1xPhospho [S7(95.7)]	PBANKA_081990 1xPhospho [S171(95.7)]	1	3	PBANKA_081990	nucleosome assembly protein (NAPS)	PBANKA_081990 [165-183]	1	2639.32	S7(Phospho): 95.67	85.2	143.1	113.9	135.8	74.3	104.8	70.4	72.5	25.1	42.2	33.6	40	21.9	30.9	20.8	21.4	13.7	25.7	21.8	28.1	21.9	26.7	20.1	16.6	1	1	1	1	1	1	1	1	2.0765	High	9.48723	0.0009266	0.006935	29.63	9.48723
[R].NMGNSENAEHAENNEDSADNLSIQMDANEK.[Q]	2xTMT6plex [N-Term; K30]; 3xPhospho [S5; S17; S22]; 3xDeamidated [N/Q]; 2xOxidation [M2; M25]	PBANKA_050730 3xPhospho [S4239; S4251; S4256]	1	4	PBANKA_050730	dynein heavy chain, putative	PBANKA_050730 [4235-4264]	0	4024.51		85.4	118.2	84.9		135.6	95.6	190.4	90	4	5.6	4		6.4	4.5	9	4.2	2.2	3.4	2.6		6.4	3.9	8.7	3.3	1	1	1		1	1	1	1						30.47	9.17898
[K].NEVLGEANDNSPNNDTDQLGK.[R]	2xTMT6plex [N-Term; K21]; 1xPhospho [S/T]; 2xDeamidated [N/Q]		1	13	PBANKA_050320	eukaryotic translation initiation factor subunit eIF2A, putative	PBANKA_050320 [886-906]	0	2784.26		68.6	131.4	77.6	71.8	112.4	97.1	149.5	91.5	5.3	10.2	6	5.6	8.7	7.5	11.6	7.1	2.9	6.2	3.9	3.9	8.7	6.5	11.2	5.5	1	1	1	1	1	1	1	1	1.52303	High	15.0424	0.004123	0.03424	26.14	15.0424
[R].LPSSSEGDQLK.[K]	2xTMT6plex [N-Term; K11]; 1xPhospho [S3(99.6)]	PBANKA_061160 1xPhospho [S10(99.6)]	1	49	PBANKA_061160	ribonucleoside-diphosphate reductase, large subunit, putative	PBANKA_061160 [8-18]	0	1698.87	S3(Phospho): 92.05	104.4	127.1	101.9	161.2	77	80.3	81.5	66.7	640.9	780.5	625.3	989.5	472.9	492.7	500.2	409.3	349.9	475.8	406	694.9	472.9	426.1	484.4	317.9	16	16	16	16	16	16	16	16	3.68014	High	-3.87888	0.0002581	0.001117	61.71	-4.41778
[K].EDDVKDEVTEETA.[-]	2xTMT6plex [N-Term; K5]; 1xPhospho [T]	PBANKA_020500 1xPhospho [T171(97.9)]	1	2	PBANKA_020500	conserved Plasmodium protein, unknown function	PBANKA_020500 [160-172]	1	2017.93		87.3	100.9	81.7	135.7	104.2	95.1	95.7	99.5	22.7	26.2	21.3	35.3	27.1	24.7	24.9	25.9	12.4	16	13.8	24.8	27.1	21.4	24.1	20.1	1	1	1	1	1	1	1	1	2.07207	High	1.27618	0.004938	0.04148	27.57	1.27618
[K].YENNGYMMDNAEISTEEDIIVK.[K]	2xTMT6plex [N-Term; K22]; 2xOxidation [M7; M8]; 1xPhospho [S/T/Y]	PBANKA_110510 1xPhospho [S125(91.7)]	1	3	PBANKA_110510	DNA mismatch repair protein MSH6, putative (MSH6)	PBANKA_110510 [112-133]	0	3148.41	S14(Phospho): 91.67	54.4	103.1	82	87	103	133.3	109.1	128.1	6.2	11.8	9.4	10	11.8	15.3	12.5	14.7	3.4	7.2	6.1	7	11.8	13.2	12.1	11.4	1	1	1	1	1	1	1	1	2.79589	High	-2.24352	0	6.633e-05	39.26	-2.24352
[K].LNGEYFENMTGSVR.[L]	1xTMT6plex [N-Term]; 1xDeamidated [N2]; 1xOxidation [M9]; 1xPhospho [S12(85.6)]	PBANKA_143140 1xPhospho [S482(85.6)]	1	5	PBANKA_143140	conserved Plasmodium protein, unknown function	PBANKA_143140 [471-484]	0	1942.85	S12(Phospho): 87.62	58.4	69.7	65.5	102.9	167.9	93.4	50.5	191.6	2.7	3.3	3.1	4.8	7.9	4.4	2.4	9	1.5	2	2	3.4	7.9	3.8	2.3	7	1	1	1	1	1	1	1	1	1.95885	High	-0.676581	0.0005205	0.002565	36.76	-0.676581
[K].NNNNHYIINDNK.[N]	2xTMT6plex [N-Term; K12]		1	2	PBANKA_122300	conserved Plasmodium protein, unknown function	PBANKA_122300 [821-832]	0	1931.01		100.7	144.3	103.7	140.9	91.3	79.8	75	64.4	30.2	43.3	31.1	42.3	27.4	23.9	22.5	19.3	16.5	26.4	20.2	29.7	27.4	20.7	21.8	15	1	1	1	1	1	1	1	1	2.10179	High	-0.453234	0.0006943	0.003469	14.02	-0.453234
[R].NQNYLTNENYNSR.[R]	1xTMT6plex [N-Term]; 1xPhospho [Y/S/T]		1	3	PBANKA_060560	conserved Plasmodium protein, unknown function	PBANKA_060560 [2126-2138]	0	1938.85	Y10(Phospho): 50; S12(Phospho): 50	84	122.1	84.8	113.7	88	92.4	94.1	120.8	24.7	35.9	25	33.5	25.9	27.2	27.7	35.5	13.5	21.9	16.2	23.5	25.9	23.5	26.8	27.6	1	1	1	1	1	1	1	1	3.366	High	2.49469	0.0001929	0.0009381	34.88	2.49469
[R].IEESLGANGSFAGDK.[F]	2xTMT6plex [N-Term; K15]; 1xPhospho [S]	PBANKA_121430 1xPhospho [S435(100)]	1	8	PBANKA_121430	enolase, putative (ENO)	PBANKA_121430 [426-440]	0	2033		52.8	92.3	100.6	121.9	106.5	122.8	117.9	85.2	19.2	33.6	36.7	44.4	38.8	44.8	43	31	10.5	20.5	23.8	31.2	38.8	38.7	41.6	24.1	3	3	3	3	3	3	3	3	3.24786	High	-4.48901	0	1.126e-05	58.35	-3.31814
[K].GNRNSNSENNNGNNNYNSTNNENTNDK.[S]	2xTMT6plex [N-Term; K27]; 2xDeamidated [N]		1	5	PBANKA_041490	dynein light intermediate chain 2, putative	PBANKA_041490 [649-675]	1	3473.52		51	96.7	73.1	76.9	126	58.7	130.1	187.6	3.1	5.9	4.5	4.7	7.7	3.6	8	11.5	1.7	3.6	2.9	3.3	7.7	3.1	7.7	8.9	1	1	1	1	1	1	1	1						25.2	-0.470057
[K].EKYDGYEDNLNDIDDVDTHDGNR.[T]	2xTMT6plex [N-Term; K2]; 1xPhospho [Y/T]	PBANKA_093500 1xPhospho [T80(100)]	1	2	PBANKA_093500	conserved Plasmodium protein, unknown function	PBANKA_093500 [63-85]	1	3250.42		69.5	121.8	98.8	113	92.7	118.9	103.3	82	17.8	31.2	25.3	28.9	23.7	30.4	26.4	21	9.7	19	16.4	20.3	23.7	26.3	25.6	16.3	1	1	1	1	1	1	1	1	3.61609	High	-1.23559	0	9.829e-06	59.45	-1.23559
[K].INYETDSNNDIEK.[E]	2xTMT6plex [N-Term; K13]; 2xPhospho [T/S/Y]	PBANKA_094260 2xPhospho [T469(96.1); S471(96.1)]	1	4	PBANKA_094260	conserved Plasmodium protein, unknown function	PBANKA_094260 [465-477]	0	2172.95	T5(Phospho): 96.06; S7(Phospho): 96.06	44.9	114.3	92.3	76	100.2	110.8	113.6	147.9	8.2	21	16.9	14	18.4	20.4	20.9	27.2	4.5	12.8	11	9.8	18.4	17.6	20.2	21.1	2	2	2	2	2	2	2	2	2.50281	High	-0.278988	5.957e-05	0.0003796	31.63	1.40633
[K].IINNNNNNNNNNNNNNNNNNNNNNNNNK.[Y]	2xTMT6plex [N-Term; K28]; 1xDeamidated [N]		1	20	PBANKA_133750	conserved Plasmodium protein, unknown function	PBANKA_133750 [1120-1147]	0	3683.66		87.1	131.9	92.9	119.2	68.3	69.7	112.7	118.2	13	19.7	13.9	17.8	10.2	10.4	16.8	17.6	7.1	12	9	12.5	10.2	9	16.3	13.7	1	1	1	1	1	1	1	1	2.16878	High	1.18335	0	6.152e-05	56.56	1.18335
[R].MGDDSLNPDNDLSDDKDSDDESSDGSDK.[Q]	1xPhospho [S5]; 2xTMT6plex [K16; K28]; 1xAcetyl [N-Term]; 1xDeamidated [N]	PBANKA_093840 1xPhospho [S312]; 1xAcetyl [N-Term]	1	2	PBANKA_093840	endoplasmic reticulum-resident calcium binding protein, putative	PBANKA_093840 [308-335]	1	3569.42		104.7	125	51.3	94.9	83.3	71.6	201.6	67.5	4.4	5.2	2.2	4	3.5	3	8.5	2.8	2.4	3.2	1.4	2.8	3.5	2.6	8.2	2.2	1	1	1	1	1	1	1	1						17.45	6.10902
[K].DNHTDVDADFLK.[F]	2xTMT6plex [N-Term; K12]; 1xPhospho [T4(100)]	PBANKA_062220 1xPhospho [T1968(100)]	1	2	PBANKA_062220	conserved Plasmodium protein, unknown function	PBANKA_062220 [1965-1976]	0	1927.92		71.4	100.4	92.1	127.8	87.9	122.1	94.5	103.9	15.8	22.1	20.3	28.2	19.4	26.9	20.9	22.9	8.6	13.5	13.2	19.8	19.4	23.3	20.2	17.8	1	1	1	1	1	1	1	1	3.59389	High	-5.08242	3.638e-05	0.0001542	39.56	-5.08242
[K].SNPEINLK.[R]	2xTMT6plex [N-Term; K8]; 1xPhospho [S1(100)]	PBANKA_082710 1xPhospho [S132(100)]	1	1	PBANKA_082710	protein kinase, putative	PBANKA_082710 [132-139]	0	1452.79	S1(Phospho): 100	97.2	125.7	93.2	139.7	83.7	76.9	90.7	92.9	78.4	101.4	75.2	112.6	67.5	62	73.1	74.9	42.8	61.8	48.8	79.1	67.5	53.6	70.8	58.2	1	1	1	1	1	1	1	1	2.69166	High	-4.58179	0.004119	0.03415	22.77	-4.58179
[K].NIENSDAPYNSGNYNETAIHTK.[L]	2xTMT6plex [N-Term; K22]; 1xPhospho [Y/T/S]		1	11	PBANKA_091260	conserved Plasmodium protein, unknown function	PBANKA_091260 [252-273]	0	2990.39		118.8	121.7	62.2	130.2	91.4	87.8	78.7	109.3	34.4	35.3	18	37.7	26.5	25.4	22.8	31.7	18.8	21.5	11.7	26.5	26.5	22	22.1	24.6	2	2	2	2	2	2	2	2	3.79907	High	3.38846	0	5.864e-06	51.24	3.38846
[R].YYSFNSNGESEK.[V]	2xTMT6plex [N-Term; K12]; 1xPhospho [S6(99.9)]	PBANKA_040620 1xPhospho [S1273(98.3)]	1	4	PBANKA_040620	conserved Plasmodium protein, unknown function	PBANKA_040620 [1268-1279]	0	1962.89	S6(Phospho): 98.32	112.4	158.7	108.5	148.9	67.2	65.9	66.9	71.5	129.5	182.9	125.1	171.6	77.4	76	77.1	82.4	70.7	111.5	81.2	120.5	77.4	65.7	74.7	64	2	2	2	2	2	2	2	2	3.121	High	-3.86316	0.0004442	0.001913	31.81	-3.63865
[K].INTNDSEIHQR.[K]	1xTMT6plex [N-Term]; 2xPhospho [T3(100); S6(100)]	PBANKA_130390 2xPhospho [T259(100); S262(100)]	1	2	PBANKA_130390	conserved Plasmodium protein, unknown function	PBANKA_130390 [257-267]	0	1715.74	T3(Phospho): 100; S6(Phospho): 100	88.6	124.7	96.8	133.3	76.2	94.9	89.1	96.5	42.3	59.5	46.2	63.6	36.4	45.3	42.5	46.1	23.1	36.3	30	44.7	36.4	39.2	41.2	35.8	1	1	1	1	1	1	1	1	2.98878	High	1.03327	0.0007888	0.004552	23.92	1.03327
[K].ADNSSLNNNTLGNETFSIAYDEEK.[N]	2xTMT6plex [N-Term; K24]; 1xPhospho [S/T/Y]; 1xDeamidated [N]		1	28	PBANKA_100880	glucose-6-phosphate isomerase, putative	PBANKA_100880 [182-205]	0	3185.46		49.3	101.9	95.7	100.3	108.6	98.4	134.9	110.9	10.1	20.8	19.6	20.5	22.2	20.1	27.6	22.7	5.5	12.7	12.7	14.4	22.2	17.4	26.7	17.6	2	2	2	2	2	2	2	2	3.61637	High	8.31874	0	8.638e-06	54.32	8.31874
[K].HDNNMTLK.[V]	2xTMT6plex [N-Term; K8]; 1xOxidation [M5]		1	1	PBANKA_101790	phosphoenolpyruvate carboxylase (PEPC)	PBANKA_101790 [952-959]	0	1446.78		58.6	122	89.9	83.1	97.5	102.6	90.8	155.5	7.3	15.3	11.2	10.4	12.2	12.8	11.4	19.4	4	9.3	7.3	7.3	12.2	11.1	11	15.1	1	1	1	1	1	1	1	1	1.14093	High	0.387148	0.009528	0.08378
[R].NETVENIDMNELQK.[K]	2xTMT6plex [N-Term; K14]; 1xPhospho [T3(100)]; 1xOxidation [M9]	PBANKA_133750 1xPhospho [T2723(100)]	1	4	PBANKA_133750	conserved Plasmodium protein, unknown function	PBANKA_133750 [2721-2734]	0	2231.07		105.6	148	101.5	139.6	73.2	82.2	69.3	80.6	70.7	99.1	67.9	93.4	49	55	46.4	53.9	38.6	60.4	44.1	65.6	49	47.6	44.9	41.9	2	2	2	2	2	2	2	2	3.3838	High	1.55218	5.957e-05	0.0003122	50.72	1.55218
[R].TNLLGEQTENNNVIENDKQSYSNSR.[K]	2xTMT6plex [N-Term; K18]; 2xPhospho [S22(80.3); S/Y/T]	PBANKA_093720.2 2xPhospho [T/S/Y]	2	5	PBANKA_093720.2	asparagine-rich antigen, putative	PBANKA_093720.2 [946-970]	1	3485.6		75.2	108.9	86.5	116.1	97.2	87.3	118.5	110.4	12.5	18	14.3	19.2	16.1	14.5	19.6	18.3	6.8	11	9.3	13.5	16.1	12.5	19	14.2	2	2	2	2	2	2	2	2	2.57875	Medium	1.62634	0.01056	0.09837	35.56	1.62634
[K].DLSTNHELYENDSKEEFQEK.[K]	3xTMT6plex [N-Term; K14; K20]; 2xPhospho [S3(78.8); Y/S/T]	PBANKA_092160 2xPhospho [S328(78.8); Y/S/T]	1	4	PBANKA_092160	RNA-binding protein, putative	PBANKA_092160 [326-345]	1	3302.51	S3(Phospho): 78.78; Y9(Phospho): 50; S13(Phospho): 50	79.7	103.3	92.2	135.1	80	115.5	107.1	87.2	43.4	56.3	50.2	73.6	43.6	62.9	58.3	47.5	23.7	34.3	32.6	51.7	43.6	54.4	56.5	36.9	1	1	1	1	1	1	1	1	4.50948	High	0.179226	5.957e-05	0.0003056	21.64	0.179226
[K].SIEVHSPK.[K]	2xTMT6plex [N-Term; K8]; 2xPhospho [S1(100); S6(100)]	PBANKA_080300 2xPhospho [S4(100); S9(100)]	1	2	PBANKA_080300	origin recognition complex subunit 2, putative (ORC2)	PBANKA_080300 [4-11]	0	1514.74	S1(Phospho): 100; S6(Phospho): 100	85.8	85	92.7	162.7	100	103	109.9	61.1	84.1	83.3	90.9	159.5	98	100.9	107.7	59.9	45.9	50.8	59	112	98	87.3	104.3	46.5	2	2	2	2	2	2	2	2	3.23822	High	0.259739	0.003596	0.02856	12.92	0.259739
[K].EGELTDKDENEIDENGNIEEGK.[D]	3xTMT6plex [N-Term; K7; K22]; 1xPhospho [T5(100)]	PBANKA_082290 1xPhospho [T286(100)]	1	6	PBANKA_082290	conserved Plasmodium protein, unknown function	PBANKA_082290 [282-303]	1	3244.53		98.1	93.4	98.8	179.7	79.8	102.3	88.1	59.7	46.3	44.1	46.7	84.9	37.7	48.3	41.6	28.2	25.3	26.9	30.3	59.6	37.7	41.8	40.3	21.9	2	2	2	2	2	2	2	2	3.66909	High	-0.634892	5.957e-05	0.0003958	25.58	-0.160456
[K].KTTDSESATNK.[D]	3xTMT6plex [N-Term; K1; K11]; 2xPhospho [S/T]	PBANKA_143920 2xPhospho [T304; S308]	1	1	PBANKA_143920	polyadenylate-binding protein, putative (PABP)	PBANKA_143920 [302-312]	1	2028.99	T3(Phospho): 71.74; S7(Phospho): 73.72	78.3	102.1	98.9	143.6	97.2	102.4	100.4	77.1	36.1	47.1	45.6	66.2	44.8	47.2	46.3	35.5	19.7	28.7	29.6	46.5	44.8	40.8	44.8	27.6	1	1	1	1	1	1	1	1	1.92972	Medium	0.952634	0.04092	0.3874	16.64	0.952634
[K].LEEENQLIESDVEK.[E]	2xTMT6plex [N-Term; K14]; 1xPhospho [S10(100)]	PBANKA_061040 1xPhospho [S298(100)]	1	10	PBANKA_061040	ATPase, putative	PBANKA_061040 [289-302]	0	2213.1		77.1	90.4	91.4	143.1	111.8	112.9	104.2	69	40.3	47.2	47.7	74.8	58.4	59	54.4	36.1	22	28.8	31	52.5	58.4	51	52.7	28	4	4	4	4	4	4	4	4	3.93252	High	1.18006	0	3.064e-06	55.88	1.18006
[K].NNENDGNNNNDKPQESDEKDEKLEDSIDGAGR.[N]	4xTMT6plex [N-Term; K12; K19; K22]; 1xPhospho [S]		1	1	PBANKA_080410	conserved Plasmodium protein, unknown function	PBANKA_080410 [741-772]	2	4557.14	S16(Phospho): 50; S26(Phospho): 50	78.9	88	96.5	155.3	89.8	99.1	110.3	82.1	35.2	39.2	43	69.2	40	44.2	49.2	36.6	19.2	23.9	27.9	48.6	40	38.2	47.6	28.4	1	1	1	1	1	1	1	1	2.98661	High	-0.377012	0.0001929	0.0009826
[R].GENISEQNQNTEINNNGIK.[N]	2xTMT6plex [N-Term; K19]; 1xPhospho [S5(100)]; 1xDeamidated [N]	PBANKA_133140 1xPhospho [S2007(100)]	1	5	PBANKA_133140	conserved Plasmodium protein, unknown function	PBANKA_133140 [2003-2021]	0	2655.27		73.5	104.4	86.6	117.3	89.2	113.9	101.7	113.4	24.7	35.1	29.1	39.4	30	38.3	34.2	38.1	13.5	21.4	18.9	27.7	30	33.1	33.1	29.6	2	2	2	2	2	2	2	2	3.22057	High	-0.394099	0	2.699e-05	77.5	-0.394099
[K].GGGNNVNHNASSVNK.[I]	2xTMT6plex [N-Term; K15]; 1xPhospho [S]		1	2	PBANKA_060950	kinesin-7, putative	PBANKA_060950 [642-656]	0	2006.98	S11(Phospho): 50; S12(Phospho): 50	39.4	61.2	148.2	196.3	130.7	63.1	118.6	42.5	2.7	4.3	10.3	13.7	9.1	4.4	8.3	3	1.5	2.6	6.7	9.6	9.1	3.8	8	2.3	1	1	1	1	1	1	1	1	1.06188	High	1.36499	0.005695	0.05077
[K].YNYNSVDESDEQK.[D]	2xTMT6plex [N-Term; K13]; 2xPhospho [Y/S]; 1xDeamidated [N4]	PBANKA_133090 2xPhospho [S403(97.8); S407(100)]	1	2	PBANKA_133090	conserved Plasmodium protein, unknown function	PBANKA_133090 [399-411]	0	2209.9		71.6	102	102.2	139.2	103.1	84.3	113.8	83.9	12.1	17.2	17.3	23.5	17.4	14.2	19.2	14.2	6.6	10.5	11.2	16.5	17.4	12.3	18.6	11	1	1	1	1	1	1	1	1	1.93363	High	9.80722	0.003641	0.02914	19.1	9.80722
[R].RQSGNYNNPDLK.[D]	2xTMT6plex [N-Term; K12]; 1xPhospho [S3(100)]	PBANKA_040600 1xPhospho [S289(100)]	1	6	PBANKA_040600	conserved Plasmodium protein, unknown function	PBANKA_040600 [287-298]	1	1943.97	S3(Phospho): 100	124.1	162.1	114.7	168.3	60	62.2	51.1	57.5	220.7	288.4	203.9	299.3	106.8	110.5	91	102.2	120.5	175.8	132.4	210.2	106.8	95.6	88.1	79.4	3	3	3	3	3	3	3	3	3.85765	High	0.0484811	0.0001278	0.000728	31.81	0.0484811
[K].QTDTGNEYIDGDNINENDK.[N]	2xTMT6plex [N-Term; K19]		1	2	PBANKA_110480	actin-like protein, putative (ALP2b)	PBANKA_110480 [134-152]	0	2613.23		76.7	108.8	81.3	110	89	114.6	110	109.6	17.6	24.9	18.6	25.2	20.4	26.2	25.2	25.1	9.6	15.2	12.1	17.7	20.4	22.7	24.4	19.5	1	1	1	1	1	1	1	1	2.35874	High	0.89098	5.957e-05	0.0002152	32.48	0.89098
[R].SNANNSDQNNPNNSITNSGNNR.[N]	1xTMT6plex [N-Term]; 1xDeamidated [N]; 1xPhospho [S14(86.6)]	PBANKA_120260 1xPhospho [S77(86.6)]	1	4	PBANKA_120260	E3 ubiquitin-protein ligase, putative	PBANKA_120260 [64-85]	0	2656.12	S14(Phospho): 86.59	78.4	81	83.7	145.3	120.2	152.3	62.9	76.3	4.8	4.9	5.1	8.8	7.3	9.3	3.8	4.6	2.6	3	3.3	6.2	7.3	8	3.7	3.6	1	1	1	1	1	1	1	1	2.29209	High	8.88378	0.0006213	0.002824	38.1	8.88378
[R].AFDDAITEFDNVSEDSYK.[D]	2xTMT6plex [N-Term; K18]; 1xPhospho [S/Y/T]	PBANKA_071260 1xPhospho [S222(100)]	1	29	PBANKA_071260	14-3-3 protein (14-3-3I)	PBANKA_071260 [210-227]	0	2604.18		86.7	97.7	89.1	145.4	111.2	114.3	123.4	32.2	250.7	282.5	257.5	420.5	321.5	330.5	356.9	93	136.9	172.2	167.2	295.3	321.5	285.8	345.6	72.2	13	13	13	13	13	13	13	13	4.68462	High	-3.54042	0	3.681e-06	66.79	1.24081
[M].AEEFTDDIGVFSK.[K]	1xPhospho [T5]; 1xTMT6plex [K13]; 1xAcetyl [N-Term]	PBANKA_052280 1xPhospho [T6]; 1xAcetyl [N-Term]	1	1	PBANKA_052280	40S ribosomal protein S19, putative (RPS19)	PBANKA_052280 [2-14]	0	1808.82		80.6	112.5	70.2	96.2	101.9	109.5	84.6	144.4	15.8	22	13.7	18.8	19.9	21.4	16.5	28.2	8.6	13.4	8.9	13.2	19.9	18.5	16	21.9	1	1	1	1	1	1	1	1						34.56	-0.0179421
[K].SHIYYTSNSNQK.[F]	2xTMT6plex [N-Term; K12]; 1xPhospho [S/T/Y]	PBANKA_135680 1xPhospho [S6040(99.9)]	1	2	PBANKA_135680	conserved Plasmodium protein, unknown function	PBANKA_135680 [6032-6043]	0	1979.96		71.1	116.1	78.2	90.5	106.6	105.5	110.5	121.4	16.7	27.2	18.3	21.2	25	24.7	25.9	28.5	9.1	16.6	11.9	14.9	25	21.4	25.1	22.1	1	1	1	1	1	1	1	1	3.10942	High	1.18966	5.957e-05	0.0003809	34.32	1.18966
[K].SRLSEQDDEIEEKSSDNNFGEGK.[E]	3xTMT6plex [N-Term; K13; K23]; 2xPhospho [S]		1	1	PBANKA_020880	ubiquitin carboxyl-terminal hydrolase 1, putative (UBP1)	PBANKA_020880 [327-349]	2	3460.58	S4(Phospho): 72.44; S15(Phospho): 72.78	78.8	90.6	71.9	117.9	114.9	106.6	109.4	109.8	19.4	22.3	17.7	29	28.3	26.2	27	27	10.6	13.6	11.5	20.4	28.3	22.7	26.1	21	1	1	1	1	1	1	1	1	2.4831	High	1.03677	0.0008383	0.005464	20.03	1.03677
[R].RYTIGGDSGIQK.[N]	2xTMT6plex [N-Term; K12]; 1xPhospho [Y/T/S]		1	3	PBANKA_143520	conserved Plasmodium protein, unknown function	PBANKA_143520 [167-178]	1	1832.97	Y2(Phospho): 50; T3(Phospho): 50	76.3	107.3	71.7	97.2	96.9	116.6	106	128	84.1	118.3	79	107.1	106.8	128.5	116.8	141	45.9	72.1	51.3	75.2	106.8	111.1	113.1	109.5	1	1	1	1	1	1	1	1	5.72787	High	1.70503	0	1.154e-05	34.07	1.70503
[K].MASKDDSASSEVPTEDHK.[I]	3xTMT6plex [N-Term; K4; K18]; 1xOxidation [M1]; 1xPhospho [S3(99.1)]	PBANKA_112770 1xPhospho [S136(99.1)]	1	10	PBANKA_112770	nicotinate phosphoribosyltransferase, putative (NAPRT)	PBANKA_112770 [134-151]	1	2717.29	S3(Phospho): 75.72	109.4	154.4	118.8	160.5	67.7	62.5	65.9	60.8	205.3	289.9	223	301.3	127.1	117.3	123.6	114.1	112.1	176.7	144.8	211.6	127.1	101.4	119.7	88.6	4	4	4	4	4	4	4	4	3.82624	High	1.31634	5.957e-05	0.000338	21.29	1.31634
[K].EIETENNESIEDPKDQNDIEK.[V]	3xTMT6plex [N-Term; K14; K21]; 2xDeamidated [N6; N7]; 1xPhospho [T/S]	PBANKA_144820 1xPhospho [S2690(98.8)]	1	1	PBANKA_144820	asparagine/aspartate rich protein, putative	PBANKA_144820 [2682-2702]	1	3258.54	S9(Phospho): 98.82	71.4	106.1	82.7	106.2	111.5	111.9	92.4	117.8	31.1	46.3	36	46.3	48.6	48.8	40.3	51.4	17	28.2	23.4	32.5	48.6	42.2	39	39.9	1	1	1	1	1	1	1	1	3.33921	High	6.32865	5.957e-05	0.0004044
[K].QFPEIEDEENVNSNK.[N]	2xTMT6plex [N-Term; K15]; 1xPhospho [S13(100)]	PBANKA_070470 1xPhospho [S92(100)]	1	6	PBANKA_070470	conserved Plasmodium protein, unknown function	PBANKA_070470 [80-94]	0	2330.1		61.9	84.7	82.4	114.9	107	128.6	107.6	113	13.2	18	17.6	24.5	22.8	27.4	22.9	24.1	7.2	11	11.4	17.2	22.8	23.7	22.2	18.7	2	2	2	2	2	2	2	2	2.87233	High	0.346279	8.7e-05	0.0004628	45.61	0.346279
[R].NDNVNNNNNNNGISNDGK.[K]	2xTMT6plex [N-Term; K18]; 2xDeamidated [N]		1	9	PBANKA_070730	histone acetyltransferase GCN5, putative (GCN5)	PBANKA_070730 [418-435]	0	2391.12		88.7	98.2	96.1	156.8	77.6	105.1	103.2	74.3	28.6	31.7	31	50.5	25	33.9	33.2	23.9	15.6	19.3	20.1	35.5	25	29.3	32.2	18.6	1	1	1	1	1	1	1	1	2.79789	High	0.55705	0	5.514e-05	35.1	0.55705
[K].EDISSSDITMDIPK.[C]	2xTMT6plex [N-Term; K14]; 1xPhospho [S/T]; 1xOxidation [M10]		1	13	PBANKA_100610	flap endonuclease 1, putative (FEN1)	PBANKA_100610 [459-472]	0	2105.01		68	99.8	83	108.4	108.5	101.5	127.5	103.2	18.7	27.4	22.8	29.8	29.8	27.9	35	28.3	10.2	16.7	14.8	20.9	29.8	24.1	33.9	22	3	3	3	3	3	3	3	3	2.1332	High	-2.02652	0.004123	0.03436	33.07	-0.286812
[K].GNSTDINMNNTTNVYLASEEK.[V]	2xTMT6plex [N-Term; K21]; 1xPhospho [S/T/Y]; 1xOxidation [M8]		1	4	PBANKA_041610	dynein heavy chain, putative	PBANKA_041610 [4906-4926]	0	2869.33		79	155.4	63.2	40.5	102.1	103.4	114.1	142.3	7.5	14.8	6	3.8	9.7	9.8	10.8	13.5	4.1	9	3.9	2.7	9.7	8.5	10.5	10.5	1	1	1	1	1	1	1	1	2.00859	High	1.56416	0.0005205	0.00252	31.69	1.56416
[K].FNNTSNLDNEHPYSINSYNDETENR.[N]	1xTMT6plex [N-Term]; 2xPhospho [S/Y/T]	PBANKA_092580 2xPhospho [S1189(83); Y/S/T]	1	6	PBANKA_092580	conserved Plasmodium protein, unknown function	PBANKA_092580 [1173-1197]	0	3376.36		78.5	93.5	66.5	106.1	103.8	122.3	104.1	125.2	23.8	28.4	20.2	32.2	31.5	37.1	31.6	38	13	17.3	13.1	22.6	31.5	32.1	30.6	29.5	2	2	2	2	2	2	2	2	3.51877	High	-0.530822	0	2.139e-06	59.54	-0.530822
[K].DATPGEDQTSANGTTTTVTSTTDAK.[T]	2xTMT6plex [N-Term; K25]; 1xPhospho [T/S]		1	40	PBANKA_143920	polyadenylate-binding protein, putative (PABP)	PBANKA_143920 [313-337]	0	3008.4		79	91.4	91.2	142.9	95	115.2	99.1	86.2	162.1	187.7	187.3	293.5	195	236.5	203.4	177	88.5	114.4	121.6	206.1	195	204.5	197	137.5	7	7	7	7	7	7	7	7	4.45666	High	1.86587	0	4.426e-07	87.34	1.86587
[K].IRDNSEGNNNENEEGK.[E]	2xTMT6plex [N-Term; K16]; 1xPhospho [S5(100)]	PBANKA_120210 1xPhospho [S667(100)]	1	3	PBANKA_120210	conserved Plasmodium protein, unknown function	PBANKA_120210 [663-678]	1	2357.08	S5(Phospho): 100	74.9	99.5	91.6	129.9	96.6	115.2	107.5	84.9	76.2	101.2	93.2	132.1	98.3	117.3	109.4	86.4	41.6	61.7	60.5	92.8	98.3	101.4	105.9	67.1	2	2	2	2	2	2	2	2	4.64811	High	-1.0505	0	5.622e-05	34.6	-1.0505
[K].NFSYQEEDEEEDEEDEESDSNDDDFGEK.[S]	2xTMT6plex [N-Term; K28]; 2xDeamidated [Q5; N21]; 2xPhospho [S18(75); S20(75)]	PBANKA_141560 2xPhospho [S741(98.7); S743(98.7)]	1	8	PBANKA_141560	DNA replication licensing factor MCM4, putative (MCM4)	PBANKA_141560 [724-751]	0	3994.42	S18(Phospho): 98.73; S20(Phospho): 98.73	91.4	84.4	45	103.2	120.8	130.2	125.1	99.8	23.4	21.7	11.6	26.5	31	33.4	32.1	25.6	12.8	13.2	7.5	18.6	31	28.9	31.1	19.9	3	3	3	3	3	3	3	3	3.66417	High	6.51088	0	2.964e-06	34.91	6.51088
[R].MGDDSLNPDNDLSDDKDSDDESSDGSDK.[Q]	3xTMT6plex [N-Term; K16; K28]; 2xDeamidated [N7; N10]; 1xOxidation [M1]; 1xPhospho [S]		1	8	PBANKA_093840	endoplasmic reticulum-resident calcium binding protein, putative	PBANKA_093840 [308-335]	1	3773.55	S13(Phospho): 64.54	82.2	121.1	84.7	109.1	103.7	123.4	111.4	64.4	49.5	72.8	51	65.6	62.4	74.2	67	38.8	27	44.4	33.1	46.1	62.4	64.2	64.9	30.1	2	2	2	2	2	2	2	2	2.4077	High	6.37399	0.0001742	0.000886	25.07	6.37399
[K].EYEEILDTASENEVEEK.[N]	2xTMT6plex [N-Term; K17]; 1xPhospho [T/S/Y]	PBANKA_135640 1xPhospho [S413(98.1)]	1	11	PBANKA_135640	DNA repair protein RAD5, putative (RAD5)	PBANKA_135640 [404-420]	0	2565.19	S10(Phospho): 98.1	74.9	91.6	92.6	139.1	100.6	104.5	122.4	74.3	40.1	49	49.6	74.5	53.9	56	65.6	39.8	21.9	29.9	32.2	52.3	53.9	48.4	63.5	30.9	3	3	3	3	3	3	3	3	3.25341	High	-4.29883	0	2.761e-05	45.97	-0.515644
[K].NSSNTSINNYYK.[N]	2xTMT6plex [N-Term; K12]; 1xPhospho [S/Y/T]	PBANKA_061530 1xPhospho [T399(91.2)]	1	5	PBANKA_061530	conserved Plasmodium protein, unknown function	PBANKA_061530 [395-406]	0	1942.93		96.5	118	85.9	132.1	94.3	99.6	81.6	92	19	23.3	16.9	26.1	18.6	19.7	16.1	18.2	10.4	14.2	11	18.3	18.6	17	15.6	14.1	1	1	1	1	1	1	1	1	1.65517	High	4.049	0.002719	0.02254	19.22	0.18508
[R].REENYNNDNENNNEK.[E]	2xTMT6plex [N-Term; K15]		1	2	PBANKA_100340	lysine decarboxylase, putative (UIS14)	PBANKA_100340 [1989-2003]	1	2354.1		83.1	95	82	132.4	109.8	107.7	110	80.1	55.7	63.6	55	88.7	73.6	72.2	73.7	53.7	30.4	38.8	35.7	62.3	73.6	62.4	71.4	41.7	1	1	1	1	1	1	1	1	4.98971	High	0.860237	0	8.141e-08	38.44	0.860237
[K].NMNDISDDYLLTMDDK.[N]	2xTMT6plex [N-Term; K16]; 1xPhospho [S6(100)]; 1xDeamidated [N]; 2xOxidation [M2; M13]	PBANKA_132920 1xPhospho [S4527(100)]	1	4	PBANKA_132920	dynein beta chain, putative	PBANKA_132920 [4522-4537]	0	2474.08		55.6	87.4	84.3	105.3	121.3	131.8	135.2	79.1	7.5	11.8	11.4	14.2	16.4	17.8	18.3	10.7	4.1	7.2	7.4	10	16.4	15.4	17.7	8.3	1	1	1	1	1	1	1	1	2.38104	High	8.52961	0.002719	0.02262	17.65	8.52961
[K].EEIHEEINEINNLANSDIESNNEEHKK.[M]	3xTMT6plex [N-Term; K26; K27]; 1xDeamidated [N]; 2xPhospho [S16(100); S20(100)]	PBANKA_050680 2xPhospho [S667(100); S671(100)]	1	14	PBANKA_050680	conserved Plasmodium protein, unknown function	PBANKA_050680 [652-678]	1	4039.88	S16(Phospho): 100; S20(Phospho): 100	103.1	115.9	76.6	131.3	103.8	91.5	109.1	68.8	33	37.1	24.5	42	33.2	29.3	34.9	22	18	22.6	15.9	29.5	33.2	25.3	33.8	17.1	2	2	2	2	2	2	2	2	5.21082	High	5.35043	0	1.976e-06	51.28	5.35043
[K].GFIVDSDEEEEEEEEGK.[K]	2xTMT6plex [N-Term; K17]; 1xPhospho [S6(100)]	PBANKA_103600 1xPhospho [S205(100)]	1	11	PBANKA_103600	conserved Plasmodium protein, unknown function	PBANKA_103600 [200-216]	0	2508.1		83.2	111.2	79.4	112.3	119	111.1	110	73.8	53.3	71.2	50.8	71.9	76.2	71.1	70.4	47.3	29.1	43.4	33	50.5	76.2	61.5	68.2	36.7	5	5	5	5	5	5	5	5	3.23863	High	2.07507	0	3.489e-05	54.85	2.07507
[R].NVENINSQDNFSK.[T]	2xTMT6plex [N-Term; K13]; 1xPhospho [S]	PBANKA_122610 1xPhospho [S4674(100)]	1	4	PBANKA_122610	conserved Plasmodium protein, unknown function	PBANKA_122610 [4663-4675]	0	2046.99	S7(Phospho): 100	89.7	122.5	83.8	116.2	89.5	101.7	98.9	97.7	29.7	40.5	27.7	38.4	29.6	33.6	32.7	32.3	16.2	24.7	18	27	29.6	29.1	31.7	25.1	1	1	1	1	1	1	1	1	2.99256	High	2.18138	5.957e-05	0.0002729	44.4	2.18138
[R].NTIETISDLDNINSNDDKNK.[K]	3xTMT6plex [N-Term; K18; K20]; 1xDeamidated [N]; 2xPhospho [S7(88); S14(99.7)]	PBANKA_145530 2xPhospho [S82(88); S89(99.7)]	1	3	PBANKA_145530	conserved Plasmodium protein, unknown function	PBANKA_145530 [76-95]	1	3111.47	S7(Phospho): 87.96; S14(Phospho): 99.67	63.6	94.9	104.4	135.3	76	93.6	128	104.3	7.7	11.5	12.6	16.4	9.2	11.3	15.5	12.6	4.2	7	8.2	11.5	9.2	9.8	15	9.8	1	1	1	1	1	1	1	1	2.64109	High	-2.4763	0.0001742	0.0008452	39.67	-2.4763
[R].NIGNNIMMSSDDLTISR.[R]	1xTMT6plex [N-Term]; 1xPhospho [S9(90.8)]; 2xOxidation [M7; M8]	PBANKA_114150 1xPhospho [S115(90.8)]	1	12	PBANKA_114150	SNARE associated Golgi protein, putative	PBANKA_114150 [107-123]	0	2222	S9(Phospho): 89.96	91.9	117.3	78.8	117.3	100.4	92.2	97.1	105	97.1	123.8	83.2	123.9	106	97.4	102.5	110.9	53	75.5	54	87	106	84.2	99.3	86.1	4	4	4	4	4	4	4	4	4.4962	High	-4.21095	0	2.302e-06	61.79	-0.585104
[K].NIPFDENISEDSHILR.[N]	1xTMT6plex [N-Term]; 2xPhospho [S9(100); S12(100)]	PBANKA_102380 2xPhospho [S415(100); S418(100)]	1	4	PBANKA_102380	conserved Plasmodium protein, unknown function	PBANKA_102380 [407-422]	0	2288.02	S9(Phospho): 100; S12(Phospho): 100	80.2	135.7	90	97	88.6	102.4	129.7	76.4	8.2	13.9	9.2	10	9.1	10.5	13.3	7.9	4.5	8.5	6	7	9.1	9.1	12.9	6.1	2	2	2	2	2	2	2	2	3.54339	High	4.53305	0.0003171	0.001373	50.56	4.53305
[K].LSNSNNSEDNNQINDISR.[H]	1xTMT6plex [N-Term]		1	2	PBANKA_010330	conserved Plasmodium protein, unknown function	PBANKA_010330 [276-293]	0	2263.07		78.9	149.1	99.5	95.9	89.2	77.8	90	119.7	23.1	43.6	29.1	28.1	26.1	22.8	26.3	35	12.6	26.6	18.9	19.7	26.1	19.7	25.5	27.2	1	1	1	1	1	1	1	1	5.03136	High	1.29109	0	6.457e-09	100.17	1.29109
[R].YNNTGSNNNISNNNSGVIANHEGSEIYSR.[V]	1xTMT6plex [N-Term]; 2xDeamidated [N]		1	10	PBANKA_121470	conserved Plasmodium protein, unknown function	PBANKA_121470 [508-536]	0	3370.54		40.5	100.1	103.4	97.2	90	143.3	124.4	101.1	10.6	26.2	27.1	25.5	23.6	37.6	32.6	26.5	5.8	16	17.6	17.9	23.6	32.5	31.6	20.6	2	2	2	2	2	2	2	2	4.14951	High	6.19674	0	2.247e-07	57.95	6.19674
[K].NDNNKDSTDIEK.[A]	3xTMT6plex [N-Term; K5; K12]; 1xPhospho [S7(98.4)]	PBANKA_136010 1xPhospho [S216(98.4)]	1	1	PBANKA_136010	nucleoside transporter 1 (NT1)	PBANKA_136010 [210-221]	1	2160.08	S7(Phospho): 98.45	101.8	107.4	94.2	161.4	81	83.3	94.8	76.1	54.4	57.4	50.4	86.3	43.3	44.5	50.7	40.7	29.7	35	32.7	60.6	43.3	38.5	49.1	31.6	1	1	1	1	1	1	1	1	2.56337	High	0.264796	0.002364	0.01923
[K].NYNISSQDENKNDK.[Y]	3xTMT6plex [N-Term; K11; K14]; 2xPhospho [S5(99.8); S6(99.3)]	PBANKA_144050 2xPhospho [S229(85); S/Y]	1	2	PBANKA_144050	conserved Plasmodium protein, unknown function	PBANKA_144050 [224-237]	1	2516.17	S5(Phospho): 99.84; S6(Phospho): 99.29	96.3	119.7	89	134.4	93.6	104.3	113	49.8	113.6	141.1	104.9	158.5	110.3	122.9	133.2	58.7	62	86	68.1	111.3	110.3	106.3	129	45.6	1	1	1	1	1	1	1	1	3.29125	High	1.50927	0.0005032	0.002475	14.17	1.50927
[K].KGEEEEIDEFEEEGDEEDNSLNNDGVPQK.[S]	3xTMT6plex [N-Term; K1; K29]; 1xPhospho [S20(100)]; 1xDeamidated [N]	PBANKA_090110 1xPhospho [S364(100)]	1	6	PBANKA_090110	serine/threonine protein kinase, putative	PBANKA_090110 [345-373]	1	4091.82		57.7	116.3	110.4	113.3	96.9	124.8	118.8	61.9	7.3	14.8	14	14.4	12.3	15.8	15.1	7.9	4	9	9.1	10.1	12.3	13.7	14.6	6.1	1	1	1	1	1	1	1	1	2.78893	High	2.66496	3.638e-05	0.0001612	25.8	2.66496
[K].THFENMGTNDNINQDQR.[K]	1xTMT6plex [N-Term]; 1xOxidation [M6]; 1xPhospho [T8(100)]	PBANKA_091660 1xPhospho [T41(100)]	1	2	PBANKA_091660	oxysterol-binding protein, putative	PBANKA_091660 [34-50]	0	2359	T8(Phospho): 99.99	61.9	61.9	53.6	96.2	99.3	125.2	119	182.9	6.2	6.2	5.4	9.7	10	12.6	12	18.4	3.4	3.8	3.5	6.8	10	10.9	11.6	14.3	1	1	1	1	1	1	1	1	2.41719	High	0.54217	0.0001087	0.0005918	21.46	0.54217
[K].TASKEYLNRLSTEDNNDDDETK.[G]	3xTMT6plex [N-Term; K4; K22]; 2xPhospho [S3(85); S/Y/T]		1	2	PBANKA_041600	high molecular weight rhoptry protein 3, putative (RhopH3)	PBANKA_041600 [863-884]	2	3405.57	S3(Phospho): 65.55; S11(Phospho): 43.87; T12(Phospho): 43.87	88.2	101.2	99.1	155.6	106	94.2	104.3	51.5	76.4	87.6	85.8	134.7	91.8	81.5	90.4	44.5	41.7	53.4	55.7	94.6	91.8	70.5	87.5	34.6	2	2	2	2	2	2	2	2	3.0687	High	-5.84202	0.008121	0.07048	24.72	-3.38274
[K].DAEPQNSIK.[N]	2xTMT6plex [N-Term; K9]; 1xPhospho [S7(100)]	PBANKA_050730 1xPhospho [S1887(100)]	1	8	PBANKA_050730	dynein heavy chain, putative	PBANKA_050730 [1881-1889]	0	1539.78		83.3	92.7	92.3	147.6	91.5	109.3	116.4	66.9	213	237.2	236	377.6	234.1	279.5	297.7	171	116.3	144.6	153.2	265.2	234.1	241.7	288.3	132.8	4	4	4	4	4	4	4	4	3.26507	High	0.488746	0.0006943	0.003961	30.44	0.836763
[K].NEEYNDDQMYSVENDGTEEEDYR.[A]	1xTMT6plex [N-Term]; 1xPhospho [Y10(85.9)]; 1xOxidation [M9]	PBANKA_080790 1xPhospho [Y2256(85.9)]	1	4	PBANKA_080790	conserved Plasmodium protein, unknown function	PBANKA_080790 [2247-2269]	0	3169.19		99.6	98.8	70.2	133.2	95.3	105.4	89.9	107.6	17	16.9	12	22.8	16.3	18	15.4	18.4	9.3	10.3	7.8	16	16.3	15.6	14.9	14.3	1	1	1	1	1	1	1	1	2.93747	High	2.06317	3.638e-05	0.0001635	33.17	2.06317
[K].NQQNENQNNNHITK.[E]	2xTMT6plex [N-Term; K14]		1	1	PBANKA_101150	conserved Plasmodium protein, unknown function	PBANKA_101150 [2477-2490]	0	2154.11		83.7	57.7	50.5	125.1	107.8	104.3	130.7	140.3	7.1	4.9	4.3	10.7	9.2	8.9	11.2	12	3.9	3	2.8	7.5	9.2	7.7	10.8	9.3	1	1	1	1	1	1	1	1	1.75431	High	-0.658325	0.0006943	0.003332
[K].NNSNEIVK.[Y]	2xTMT6plex [N-Term; K8]; 1xPhospho [S3]	PBANKA_114250 1xPhospho [S211(100)]	1	1	PBANKA_114250	signal recognition particle receptor alpha subunit, putative	PBANKA_114250 [209-216]	0	1455.76		85.4	109.7	107.7	154.5	87.6	97.6	89.1	68.4	85	109.2	107.2	153.8	87.2	97.1	88.7	68.1	46.4	66.6	69.6	108	87.2	84	85.9	52.9	1	1	1	1	1	1	1	1	2.81369	High	0.189205	0.001573	0.01218	18.73	0.189205
[K].SQEALNADK.[S]	2xTMT6plex [N-Term; K9]; 1xPhospho [S1(100)]	PBANKA_146500 1xPhospho [S244(100)]; 1xPhospho [S505(100)]; 1xPhospho [S864(100)]; 1xPhospho [S1241(100)]; 1xPhospho [S1756(100)]; 1xPhospho [S2289(100)]; 1xPhospho [S2969(100)]; 1xPhospho [S3667(100)]	1	4	PBANKA_146500	fam-c protein	PBANKA_146500 [244-252]; [262-270]; [360-368]; [378-386]; [516-524]; [534-542]; [681-689]; [699-707]	0	1513.77	S1(Phospho): 100	104.4	115.8	104.5	170	81.5	83.3	80.1	60.4	379.3	420.8	379.5	617.5	296.2	302.5	291	219.5	207.1	256.5	246.4	433.7	296.2	261.6	281.8	170.5	2	2	2	2	2	2	2	2	4.08626	High	1.07818	3.638e-05	0.0001595	29.23	1.07818
[K].NEEANLTDGK.[R]	2xTMT6plex [N-Term; K10]; 1xPhospho [T7(100)]	PBANKA_111820 1xPhospho [T541(100)]	1	2	PBANKA_111820	conserved Plasmodium protein, unknown function	PBANKA_111820 [535-544]	0	1628.79		91.6	117.8	91.9	133.1	95.7	90.7	91.7	87.5	57.1	73.5	57.3	83	59.7	56.5	57.2	54.6	31.2	44.8	37.2	58.3	59.7	48.9	55.4	42.4	1	1	1	1	1	1	1	1	2.30115	High	1.17317	0.0003306	0.001602	23.19	1.17317
[K].RGNADDNDNTTEQADNQNSNDKK.[Q]	3xTMT6plex [N-Term; K22; K23]		1	2	PBANKA_031230	conserved Plasmodium protein, unknown function	PBANKA_031230 [45-67]	2	3251.57		66.1	65.1	64.9	114.8	173.3	164.2	151.6		5.5	5.4	5.4	9.5	14.4	13.6	12.6		3	3.3	3.5	6.7	14.4	11.8	12.2		1	1	1	1	1	1	1		2.45616	High	0.712421	8.7e-05	0.0004379	23.31	0.712421
[K].EKSDESSVVNNK.[I]	3xTMT6plex [N-Term; K2; K12]; 2xPhospho [S3(100); S6(84.5)]	PBANKA_080160 2xPhospho [S255(100); S258(84.5)]	1	1	PBANKA_080160	conserved Plasmodium protein, unknown function	PBANKA_080160 [253-264]	1	2183.06	S3(Phospho): 99.99; S6(Phospho): 84.51	78.3	112.4	96.2	126	97.9	101.8	109.9	77.5	31	44.5	38	49.8	38.7	40.2	43.5	30.6	16.9	27.1	24.7	35	38.7	34.8	42.1	23.8	1	1	1	1	1	1	1	1	2.10119	High	-1.77467	0.005386	0.04717	21.11	-1.77467
[K].SDVTEEGVTMNIISSDDNYNYEETR.[G]	1xTMT6plex [N-Term]; 1xPhospho [T/S/Y]; 1xDeamidated [N]; 1xOxidation [M10]		1	20	PBANKA_130690	serine/threonine protein kinase, putative (SRPK2)	PBANKA_130690 [87-111]	0	3207.34	S14(Phospho): 23.79; S15(Phospho): 23.79; Y19(Phospho): 23.79; Y21(Phospho): 23.79	50.1	140.4	108.7	76.6	90.9	115.3	92	126.1	5.7	15.9	12.3	8.7	10.3	13.1	10.4	14.3	3.1	9.7	8	6.1	10.3	11.3	10.1	11.1	1	1	1	1	1	1	1	1	1.57775	High	5.0259	0.00137	0.01046	19.39	5.0259
[K].TGNNGNTNNNEQNNIQNGDELNNK.[N]	2xTMT6plex [N-Term; K24]; 1xDeamidated [N]		1	8	PBANKA_100850	translocon component PTEX150 (PTEX150)	PBANKA_100850 [60-83]	0	3089.45		74.4	88.8	89.5	134.9	99.8	85.9	80	146.6	28	33.5	33.7	50.8	37.6	32.4	30.2	55.2	15.3	20.4	21.9	35.7	37.6	28	29.2	42.9	2	2	2	2	2	2	2	2	3.87426	High	-2.82009	0	4.032e-07	50.56	-2.82009
[K].ENNYYDNYSNNNMDDYDNFSVPR.[E]	1xTMT6plex [N-Term]; 1xDeamidated [N]; 1xOxidation [M13]; 1xPhospho [Y/S]	PBANKA_010390 1xPhospho [Y334(75.4)]	1	64	PBANKA_010390	RNA-binding protein, putative	PBANKA_010390 [319-341]	0	3189.23	Y8(Phospho): 49.15; S9(Phospho): 49.15	66.1	94.7	65.7	85.6	121.4	118.9	126	121.5	11	15.7	10.9	14.2	20.2	19.8	21	20.2	6	9.6	7.1	10	20.2	17.1	20.3	15.7	2	2	2	2	2	2	2	2	3.54765	High	5.77575	0	7.525e-07	75.32	5.77575
[K].DVNHMNNPNNIYGNSHR.[S]	1xTMT6plex [N-Term]; 1xOxidation [M5]		1	7	PBANKA_051280	merozoite TRAP-like protein, putative (MTRAP)	PBANKA_051280 [478-494]	0	2241.04		37.3	74.7	74.6	77.2	150.1	114.2	96	175.8	3.8	7.7	7.7	8	15.5	11.8	9.9	18.2	2.1	4.7	5	5.6	15.5	10.2	9.6	14.1	1	2	2	2	2	2	2	2	3.28915	High	1.18491	0	1.324e-05	35.54	1.18491
[K].DMVENPQAYAAAPVAASSAQK.[D]	2xTMT6plex [N-Term; K21]; 1xPhospho [S/Y]; 1xDeamidated [Q7]; 1xOxidation [M2]	PBANKA_091800 1xPhospho [S284(84.5)]	1	4	PBANKA_091800	60S acidic ribosomal protein P0, putative	PBANKA_091800 [267-287]	0	2674.28		75.1	119.8	107.5	129.6	87.8	112.3	94.3	73.6	20.9	33.3	29.9	36	24.4	31.2	26.2	20.5	11.4	20.3	19.4	25.3	24.4	27	25.4	15.9	2	2	2	2	2	2	2	2	2.63209	High	7.24747	0.0005032	0.002472	45.75	7.24747
[K].SESNANVSSNVDPTNSGDTQR.[K]	1xTMT6plex [N-Term]; 1xPhospho [S/T]; 1xDeamidated [N15]	PBANKA_051750 1xPhospho [S246(87.9)]	1	2	PBANKA_051750	bromodomain protein, putative	PBANKA_051750 [244-264]	0	2489.06		99.6	111.3	73.4	124.4	80.7	113.8	95.3	101.5	16.3	18.2	12	20.4	13.2	18.6	15.6	16.6	8.9	11.1	7.8	14.3	13.2	16.1	15.1	12.9	1	1	1	1	1	1	1	1	3.38838	High	-0.51835	0	3.135e-05	48.15	-0.51835
[K].DETRDEYVDSEYEK.[F]	2xTMT6plex [N-Term; K14]; 1xPhospho [Y/T/S]	PBANKA_061540 1xPhospho [Y474(89.8)]	1	8	PBANKA_061540	serine--tRNA ligase, putative	PBANKA_061540 [463-476]	1	2316.03		84.6	101.6	95.6	144.2	97.8	110.7	116.7	48.7	373.6	448.5	422.2	636.8	431.8	488.6	515.2	215.2	204	273.4	274.1	447.2	431.8	422.5	498.9	167.1	4	4	4	4	4	4	4	4	4.70651	High	1.15477	0	2.573e-05	24.71	1.15477
[K].RKSEDHDHK.[N]	3xTMT6plex [N-Term; K2; K9]; 1xPhospho [S3(100)]	PBANKA_120080 1xPhospho [S10(100)]	1	2	PBANKA_120080	RNA-binding protein, putative	PBANKA_120080 [8-16]	2	1919.01		81.7	98.7	94.1	141.2	107.3	100.3	115.4	61.2	60.3	72.8	69.5	104.2	79.2	74	85.2	45.2	32.9	44.4	45.1	73.2	79.2	64	82.5	35.1	2	2	2	2	2	2	2	2	2.51688	High	0.222424	0.00852	0.07415	17.02	0.222424
[K].LNYDSSVK.[K]	2xTMT6plex [N-Term; K8]; 1xPhospho [S5(98.6)]	PBANKA_145040 1xPhospho [S533(98.6)]	1	1	PBANKA_145040	conserved Plasmodium protein, unknown function	PBANKA_145040 [529-536]	0	1463.75	S5(Phospho): 98.56	77.8	99.5	78.5	113.4	102.1	109.2	110.1	109.4	37.7	48.2	38	55	49.5	53	53.4	53	20.6	29.4	24.7	38.6	49.5	45.8	51.7	41.2	1	1	1	1	1	1	1	1	1.67909	High	1.46949	0.004523	0.03793	14.16	1.46949
[R].LPSSSEGDQLK.[K]	2xTMT6plex [N-Term; K11]; 1xPhospho [S3(90.1)]; 1xDeamidated [Q9]	PBANKA_061160 1xPhospho [S10]	1	1	PBANKA_061160	ribonucleoside-diphosphate reductase, large subunit, putative	PBANKA_061160 [8-18]	0	1699.86		116	134.5	101.7	162.3	69.4	85.4	73.2	57.5	38.5	44.6	33.7	53.8	23	28.3	24.3	19.1	21	27.2	21.9	37.8	23	24.5	23.5	14.8	1	1	1	1	1	1	1	1	2.6512	Medium	-3.88088	0.03132	0.3037	42.03	-3.88088
[R].NASDIENYNTTK.[G]	2xTMT6plex [N-Term; K12]; 1xPhospho [S3(100)]	PBANKA_061580 1xPhospho [S42(100)]	1	2	PBANKA_061580	exported serine/threonine protein kinase (EST)	PBANKA_061580 [40-51]	0	1907.92		85.7	124	90.4	116.4	97.5	88.4	108.7	88.8	31	44.8	32.7	42	35.2	31.9	39.2	32.1	16.9	27.3	21.2	29.5	35.2	27.6	38	24.9	1	1	1	1	1	1	1	1	3.62238	High	0.856723	0.0001742	0.0008194	36.12	0.856723
[K].VSSDNTTAASVK.[I]	2xTMT6plex [N-Term; K12]; 1xPhospho [S/T]	PBANKA_123010 1xPhospho [S985(100)]	1	2	PBANKA_123010	ribonuclease, putative, fragment	PBANKA_123010 [976-987]	0	1717.88		85.6	104	77.7	118.6	112.9	111.3	97	92.9	18.5	22.5	16.8	25.6	24.4	24.1	21	20.1	10.1	13.7	10.9	18	24.4	20.8	20.3	15.6	1	1	1	1	1	1	1	1	2.11286	High	-3.20534	0.00054	0.00257	20.78	-3.20534
[R].NHYNNMTNDDENFSNESLEGR.[R]	1xTMT6plex [N-Term]; 1xOxidation [M6]; 1xPhospho [S17(99.5)]	PBANKA_121660 1xPhospho [S772(99.5)]	1	2	PBANKA_121660	cyclic amine resistance locus protein, putative (CARL)	PBANKA_121660 [756-776]	0	2825.13	S17(Phospho): 99.52	55.5	109.1	86.9	84	133.9	100.3	117.4	112.8	6.6	13	10.3	10	15.9	11.9	13.9	13.4	3.6	7.9	6.7	7	15.9	10.3	13.5	10.4	1	1	1	1	1	1	1	1	2.82394	High	2.20737	0	0.0001242	39.68	2.20737
[K].SHLDTEIGKPDDLENSNDTITEDTK.[N]	3xTMT6plex [N-Term; K9; K25]; 1xPhospho [T/S]; 2xDeamidated [N15; N17]		1	5	PBANKA_123150	ubiquitin carboxyl-terminal hydrolase 2, putative	PBANKA_123150 [764-788]	0	3556.7		90	113.6	82.9	121.3	113.3	97.4	100.1	81.4	19.2	24.3	17.7	25.9	24.2	20.8	21.4	17.4	10.5	14.8	11.5	18.2	24.2	18	20.7	13.5	1	1	1	1	1	1	1	1	3.63065	High	12.578	5.957e-05	0.0002539	47.97	12.578
[K].GDIDGMDTSNINNNTNDINNNK.[N]	2xTMT6plex [N-Term; K22]; 1xOxidation [M6]		1	2	PBANKA_123160	transcription factor with AP2 domain(s), putative (ApiAP2)	PBANKA_123160 [81-102]	0	2867.35		72.1	112.2	96	116.8	83.7	77.2	101.1	140.9	13.2	20.5	17.6	21.4	15.3	14.1	18.5	25.8	7.2	12.5	11.4	15	15.3	12.2	17.9	20	1	1	1	1	1	1	1	1	1.76097	High	0.634552	0.0003306	0.001524	19.8	0.634552
[R].NENYSQHQISR.[E]	1xTMT6plex [N-Term]; 1xPhospho [S5(90.8)]	PBANKA_070450 1xPhospho [S2784(90.8)]	1	3	PBANKA_070450	E3 ubiquitin-protein ligase, putative	PBANKA_070450 [2780-2790]	0	1684.76	S5(Phospho): 90.8	112	135.7	77.1	121.7	84.1	84.4	98.3	86.8	16.1	19.5	11.1	17.5	12.1	12.1	14.1	12.5	8.8	11.9	7.2	12.3	12.1	10.5	13.7	9.7	1	1	1	1	1	1	1	1	2.15558	High	0.117876	0.0001929	0.0009563	25.7	0.117876
[K].VNEESDDEELK.[E]	2xTMT6plex [N-Term; K11]; 1xPhospho [S5(100)]	PBANKA_145680 1xPhospho [S215(100)]	1	4	PBANKA_145680	vacuolar-sorting protein SNF7, putative	PBANKA_145680 [211-221]	0	1844.86	S5(Phospho): 100	89.3	99.7	94.1	149.8	98.8	104.9	113.7	49.6	251.3	280.5	264.9	421.6	277.9	295.3	320	139.7	137.2	171	172	296.1	277.9	255.4	309.9	108.5	2	2	2	2	2	2	2	2	4.04226	High	1.14267	0.0001278	0.0006866	51.52	1.14267
[K].ENEDNENDSDYDGEHTGSNKENR.[G]	2xTMT6plex [N-Term; K20]; 2xPhospho [S9(84.8); Y/T/S]	PBANKA_132020 2xPhospho [S1375(84.8); S1384(85.1)]	1	3	PBANKA_132020	conserved Plasmodium protein, unknown function	PBANKA_132020 [1367-1389]	1	3286.28		94.6	93.7	64.3	122.1	86.8	129	123.1	86.3	17.2	17.1	11.7	22.2	15.8	23.5	22.4	15.7	9.4	10.4	7.6	15.6	15.8	20.3	21.7	12.2	1	1	1	1	1	1	1	1	3.20737	High	-1.16035	0.001467	0.01123	35.12	-1.16035
[K].NENDDNHIKDNQSNEENNEGNISTSSNR.[D]	2xTMT6plex [N-Term; K9]; 1xPhospho [S13(100)]	PBANKA_070450 1xPhospho [S6504(100)]	1	11	PBANKA_070450	E3 ubiquitin-protein ligase, putative	PBANKA_070450 [6492-6519]	1	3726.63	S13(Phospho): 99.98	96.3	96.2	79.7	143.3	104.7	104.7	103.5	71.6	44.7	44.6	37	66.5	48.6	48.6	48	33.2	24.4	27.2	24	46.7	48.6	42	46.5	25.8	3	4	4	4	4	4	4	4	6.06601	High	0.806941	0	2.984e-10	56.46	0.806941
[R].NVIHGSDSVASANR.[E]	1xTMT6plex [N-Term]		1	6	PBANKA_114240	nucleoside diphosphate kinase b, putative	PBANKA_114240 [112-125]	0	1655.87		71.2	97.2	64.8	88	112.1	124.5	115.8	126.3	11.2	15.3	10.2	13.8	17.6	19.5	18.2	19.8	6.1	9.3	6.6	9.7	17.6	16.9	17.6	15.4	2	2	2	2	2	2	2	2	3.07624	High	1.57495	0	2.489e-06	56.27	1.57495
[R].NDDGGIESDENKK.[N]	3xTMT6plex [N-Term; K12; K13]; 1xPhospho [S8(100)]	PBANKA_142870 1xPhospho [S1192(100)]	1	19	PBANKA_142870	eukaryotic translation initiation factor 3 subunit 10, putative	PBANKA_142870 [1185-1197]	1	2188.07	S8(Phospho): 100	91.3	105.5	89.2	139.8	94.9	107.8	111	60.4	879	1016	858.4	1345.7	913.6	1037.8	1068.9	581.5	479.9	619.4	557.3	945.1	913.6	897.5	1035.2	451.6	11	11	11	11	11	11	11	11	4.19866	High	0.716624	5.957e-05	0.0002043	43.25	0.66698
[K].SATDTNMDINIDK.[D]	2xTMT6plex [N-Term; K13]; 1xOxidation [M7]; 1xPhospho [S1(99.8)]	PBANKA_123780 1xPhospho [S722(99.8)]	1	3	PBANKA_123780	multidrug resistance protein, putative (MDR1)	PBANKA_123780 [722-734]	0	1991.94	S1(Phospho): 99.85	89.3	99.9	101.3	159.2	82.5	101	94	72.8	49.3	55.1	55.9	87.9	45.5	55.7	51.8	40.2	26.9	33.6	36.3	61.7	45.5	48.2	50.2	31.2	2	2	2	2	2	2	2	2	3.02767	High	-0.0807793	3.638e-05	0.0001325	30.95	-0.0807793
[K].ENYISDEDVK.[D]	2xTMT6plex [N-Term; K10]; 1xPhospho [Y/S]	PBANKA_112350 1xPhospho [S1346(100)]	1	4	PBANKA_112350	SNF2 helicase, putative (ISWI)	PBANKA_112350 [1342-1351]	0	1749.83		95.4	109.7	90.4	142.6	96.3	99.6	96.6	69.5	114.1	131.2	108.1	170.6	115.2	119.2	115.7	83.2	62.3	80	70.2	119.8	115.2	103.1	112	64.6	2	2	2	2	2	2	2	2	3.07256	High	1.35591	0.0003306	0.001571	31.78	-0.360918
[R].SDSKILDDEDIDNYNDDDTGLDK.[F]	3xTMT6plex [N-Term; K4; K23]; 1xPhospho [S3(87.5)]	PBANKA_140250 1xPhospho [S359(89.8)]	1	6	PBANKA_140250	conserved Plasmodium protein, unknown function	PBANKA_140250 [357-379]	1	3382.57		120.1	171.2	113.8	146.3	55.3	59.3	74.1	59.9	68.1	97.1	64.5	83	31.4	33.6	42	34	37.2	59.2	41.9	58.3	31.4	29.1	40.7	26.4	2	2	2	2	2	2	2	2	5.30944	High	0.270226	0	1.088e-07	48.96	0.270226
[K].SQNNENDGNDENNDIQDDENNDIPNDDNGK.[K]	2xTMT6plex [N-Term; K30]; 1xDeamidated [N28]		1	2	PBANKA_061970	rhoptry-associated leucine zipper-like protein 1, putative (RALP1)	PBANKA_061970 [235-264]	0	3834.61		67.9	147.4	111.3	95	82.4	92.1	87	116.9	7.3	15.9	12	10.3	8.9	9.9	9.4	12.6	4	9.7	7.8	7.2	8.9	8.6	9.1	9.8	1	1	1	1	1	1	1	1	2.20176	High	7.77114	0.0006213	0.00293	22.02	7.77114
[K].DIETEKNDNNEEGSSNDQVKPENEEK.[A]	4xTMT6plex [N-Term; K6; K20; K26]; 2xPhospho [S14(92); S15(92)]	PBANKA_142500 2xPhospho [S39(99.4); S40(99.4)]	1	4	PBANKA_142500	RNA-binding protein, putative	PBANKA_142500 [26-51]	1	4067.88	S14(Phospho): 100; S15(Phospho): 100	81.7	104.8	90	128.3	96.6	105.7	115.3	77.4	107.9	138.4	118.9	169.4	127.6	139.6	152.3	102.2	58.9	84.4	77.2	119	127.6	120.7	147.5	79.4	2	2	2	2	2	2	2	2	6.60253	High	-0.630423	0	2.058e-08	31.72	-0.630423
[R].SDETGDENDKVEDIIR.[K]	2xTMT6plex [N-Term; K10]; 1xPhospho [T4(100)]	PBANKA_122680 1xPhospho [T95(100)]	1	2	PBANKA_122680	DNA repair protein RAD54, putative	PBANKA_122680 [92-107]	1	2373.12	T4(Phospho): 99.97	81.1	92.3	90.5	140.4	96	110.9	109.9	78.8	113.9	129.8	127.2	197.4	134.9	155.9	154.4	110.7	62.2	79.1	82.6	138.6	134.9	134.8	149.5	86	1	1	1	1	1	1	1	1	4.30078	High	0.688928	5.957e-05	0.0002797	25.61	0.688928
[-].MADAESVDNNVVIEEK.[A]	1xPhospho [S6]; 1xTMT6plex [K16]; 1xAcetyl [N-Term]; 1xOxidation [M1]	PBANKA_040540 1xPhospho [S6]; 1xAcetyl [N-Term]	1	1	PBANKA_040540	40S ribosomal protein S12, putative	PBANKA_040540 [1-16]	0	2129.95		58.5	115.6	84.6	78.2	98.4	134.6	89.7	140.4	7.1	14.1	10.3	9.5	12	16.4	10.9	17.1	3.9	8.6	6.7	6.7	12	14.2	10.6	13.3	1	1	1	1	1	1	1	1						40.51	-0.701329
[K].DDDEIYNNLTESESMDNINLNK.[K]	2xTMT6plex [N-Term; K22]; 1xOxidation [M15]; 1xPhospho [T/S/Y]		1	10	PBANKA_135630	conserved Plasmodium protein, unknown function	PBANKA_135630 [128-149]	0	3140.4	T10(Phospho): 33.08; S12(Phospho): 33.08; S14(Phospho): 33.08	56.9	52.5	102.8	164	144.4	71.9	136.9	70.6	6.2	5.7	11.2	17.9	15.8	7.9	15	7.7	3.4	3.5	7.3	12.6	15.8	6.8	14.5	6	1	1	2	2	2	2	2	2	1.55588	High	1.53023	0.001384	0.0106	40.57	1.53023
[K].TEEGNDSGKDNK.[A]	3xTMT6plex [N-Term; K9; K12]; 1xPhospho [S7(100)]	PBANKA_135720 1xPhospho [S871(100)]	1	2	PBANKA_135720	heat shock protein 110, putative (HSP110)	PBANKA_135720 [865-876]	1	2061.01	S7(Phospho): 100	98.4	135.7	92.3	123.3	86.6	101.5	87.4	74.7	25.5	35.1	23.9	31.9	22.4	26.2	22.6	19.3	13.9	21.4	15.5	22.4	22.4	22.7	21.9	15	1	1	1	1	1	1	1	1	2.53586	High	2.10391	5.957e-05	0.0004101	24.8	2.10391
[R].REENYNNDNENNNEK.[E]	2xTMT6plex [N-Term; K15]; 1xDeamidated [N]		1	5	PBANKA_100340	lysine decarboxylase, putative (UIS14)	PBANKA_100340 [1989-2003]	1	2355.08		87.8	88.9	84.7	144.9	103.1	106.1	116	68.7	53.3	54	51.4	88	62.6	64.4	70.4	41.7	29.1	32.9	33.4	61.8	62.6	55.7	68.2	32.4	2	2	2	2	2	2	2	2	4.15867	High	7.30998	0	1.739e-05	38.83	7.30998
[R].TINGNNNQNNSSSNDGNASNDR.[N]	1xTMT6plex [N-Term]; 2xDeamidated [N]		1	5	PBANKA_120260	E3 ubiquitin-protein ligase, putative	PBANKA_120260 [602-623]	0	2538.09		91.5	118.2	64.8	93.5	99.9	96.5	80.3	155.3	12.8	16.6	9.1	13.1	14	13.5	11.3	21.8	7	10.1	5.9	9.2	14	11.7	10.9	16.9	2	2	2	2	2	2	2	2	2.27421	High	-0.443388	0.0001278	0.000689	25.75	-0.443388
[R].NGGNTSTTGGGSITSTIGNTTNNVNTSNDNTK.[E]	2xTMT6plex [N-Term; K32]; 1xPhospho [T/S]; 4xDeamidated [N4; N19; N22; N23]	PBANKA_093960 1xPhospho [T/S]	1	7	PBANKA_093960	polyadenylate-binding protein-interacting protein 1, putative (PAIP1)	PBANKA_093960 [1304-1335]	0	3641.63		78.7	147	116.6	118.1	98.7	70	103.1	67.8	13	24.3	19.3	19.5	16.3	11.6	17	11.2	7.1	14.8	12.5	13.7	16.3	10	16.5	8.7	1	1	1	1	1	1	1	1						32.97	11.5212
[K].IEENDELDQDIDSDDMDINNNINVK.[G]	2xTMT6plex [N-Term; K25]; 1xDeamidated [N/Q]; 1xOxidation [M16]; 1xPhospho [S13(100)]	PBANKA_083110 1xPhospho [S476(100)]	1	34	PBANKA_083110	conserved Plasmodium protein, unknown function	PBANKA_083110 [464-488]	0	3475.53	S13(Phospho): 100	87.2	84.2	73.7	133.9	100	130	106.6	84.5	42.7	41.2	36	65.5	48.9	63.6	52.1	41.3	23.3	25.1	23.4	46	48.9	55	50.5	32.1	4	4	4	4	4	4	4	4	3.11466	High	0.419297	0	4.064e-05	50.38	5.26624
[K].GLGDSEDDVNK.[E]	2xTMT6plex [N-Term; K11]; 1xPhospho [S5(100)]	PBANKA_082800 1xPhospho [S203(100)]	1	2	PBANKA_082800	zinc finger protein, putative	PBANKA_082800 [199-209]	0	1686.8	S5(Phospho): 100	95	85.1	81.8	154.5	92.8	111.5	111.4	67.9	104.9	94	90.4	170.7	102.5	123.2	123.1	75.1	57.3	57.3	58.7	119.9	102.5	106.5	119.2	58.3	1	1	1	1	1	1	1	1	3.40691	High	1.35817	5.957e-05	0.0003097	43.62	1.35817
[K].SNPDIDIDIDNVNNEDNTSQSSK.[K]	2xTMT6plex [N-Term; K23]; 1xDeamidated [N/Q]; 1xPhospho [T/S]	PBANKA_145210 1xPhospho [S/T]	1	8	PBANKA_145210	conserved Plasmodium protein, unknown function	PBANKA_145210 [1428-1450]	0	3073.39	T18(Phospho): 40.85; S19(Phospho): 40.85	57.9	77.8	60.9	85.5	191.2	153.5	122.4	50.9	3.7	4.9	3.9	5.4	12.1	9.7	7.7	3.2	2	3	2.5	3.8	12.1	8.4	7.5	2.5	1	1	1	1	1	1	1	1	1.14382	Medium	4.98707	0.01331	0.1314	21.09	4.98707
[R].SNSNSFSK.[L]	2xTMT6plex [N-Term; K8]; 1xPhospho [S]	PBANKA_132890 1xPhospho [S1022(100)]	1	1	PBANKA_132890	potassium channel, putative	PBANKA_132890 [1020-1027]	0	1408.69		87.6	117.9	79.8	108.7	98.5	105.2	91	111.3	131.3	176.8	119.7	163	147.7	157.7	136.5	166.9	71.7	107.8	77.7	114.5	147.7	136.4	132.2	129.6	1	1	1	1	1	1	1	1	2.86244	High	0.551336	0.003766	0.03084	18.47	-0.19478
[K].NDTTSNDDEEQINTEDYYDEK.[R]	2xTMT6plex [N-Term; K21]; 1xPhospho [T/Y/S]	PBANKA_145460 1xPhospho [S658(90.4)]	1	10	PBANKA_145460	conserved Plasmodium protein, unknown function	PBANKA_145460 [654-674]	0	3076.28		84.4	80.1	73.1	133.2	116.9	121.7	113.6	77	12.3	11.6	10.6	19.4	17	17.7	16.5	11.2	6.7	7.1	6.9	13.6	17	15.3	16	8.7	1	1	1	1	1	1	1	1	4.38632	High	-5.25541	0	6.238e-06	58.69	-2.99358
[K].NQQNSKNDQDSDDINIDDIDEITK.[A]	3xTMT6plex [N-Term; K6; K24]; 2xPhospho [S5(95.3); T23(82.1)]		1	1	PBANKA_140620	conserved Plasmodium protein, unknown function	PBANKA_140620 [1158-1181]	1	3624.66	S5(Phospho): 66.67; S11(Phospho): 66.67; T23(Phospho): 66.67	60.8	133.9	100.9	84.8	134.4	82.6	128.2	74.5	7.1	15.7	11.9	10	15.8	9.7	15.1	8.8	3.9	9.6	7.7	7	15.8	8.4	14.6	6.8	1	1	1	1	1	1	1	1	1.65086	High	2.12318	0.003759	0.03039	13.28	2.12318
[K].EFNDGSTTNESDDDRESEYEDSDENEEIK.[L]	2xTMT6plex [N-Term; K29]; 1xDeamidated [N]; 3xPhospho [S/T/Y]		1	8	PBANKA_114590	conserved rodent malaria protein, unknown function	PBANKA_114590 [47-75]	1	4097.51	S6(Phospho): 48.53; T7(Phospho): 48.53; T8(Phospho): 58.14; S22(Phospho): 70.55	58.5	123.4	119	117.3	74.2	94.1	96.8	116.7	5.7	12	11.6	11.4	7.2	9.1	9.4	11.3	3.1	7.3	7.5	8	7.2	7.9	9.1	8.8	1	1	1	1	1	1	1	1	2.18109	High	7.52666	0.003682	0.02994	31.03	7.52666
[K].GESTYVESESESEKNVK.[K]	3xTMT6plex [N-Term; K14; K17]; 3xPhospho [S8(85.1); S12(91.6); S/T/Y]	PBANKA_060630 3xPhospho [S815; S817; S819]	1	1	PBANKA_060630	conserved Plasmodium protein, unknown function	PBANKA_060630 [808-824]	1	2829.25	Y5(Phospho): 50.32; S8(Phospho): 63.89; S10(Phospho): 78.31; S12(Phospho): 58.4	84.9	122.7	76.5	96.2	111.9	88.8	103.9	115.1	12.8	18.5	11.6	14.5	16.9	13.4	15.7	17.4	7	11.3	7.5	10.2	16.9	11.6	15.2	13.5	1	1	1	1	1	1	1	1	1.67575	Low	2.83104	0.07629	0.5865	22.41	1.74765
[K].NIDSENDDNKVEK.[E]	3xTMT6plex [N-Term; K10; K13]; 1xPhospho [S4(100)]	PBANKA_051530 1xPhospho [S132(100)]	1	3	PBANKA_051530	conserved Plasmodium protein, unknown function	PBANKA_051530 [129-141]	1	2287.14	S4(Phospho): 100	86.8	108.2	89.2	129.9	98.4	95.3	101	91	70.1	87.4	72.1	104.9	79.5	77	81.6	73.5	38.3	53.3	46.8	73.7	79.5	66.6	79	57.1	1	1	1	1	1	1	1	1	3.36359	High	-1.26553	0.0001087	0.0004981	22.38	-1.26553
[K].ENELNHGTSNSNNNNMENGGEK.[K]	2xTMT6plex [N-Term; K22]; 1xPhospho [T8(75.5)]; 2xDeamidated [N]; 1xOxidation [M16]	PBANKA_143140 1xPhospho [T168(75.5)]	1	13	PBANKA_143140	conserved Plasmodium protein, unknown function	PBANKA_143140 [161-182]	0	2959.24		49.9	47.9	119.9	182.9	118.7	135.1	60.3	85.2	2.6	2.5	6.2	9.4	6.1	6.9	3.1	4.4	1.4	1.5	4	6.6	6.1	6	3	3.4	1	1	1	1	1	1	1	1	1.18346	High	7.64599	0.003766	0.03077	24.33	7.64599
[K].QNNHINGTTPDTQNNVEDR.[A]	1xTMT6plex [N-Term]; 1xPhospho [T]; 1xDeamidated [N6]		1	4	PBANKA_141820	protein phosphatase PP2A regulatory subunit A, putative	PBANKA_141820 [274-292]	0	2477.09		100.6	118.8	76.9		77.4	167.5	149.5	109.3	4	4.8	3.1		3.1	6.7	6	4.4	2.2	2.9	2		3.1	5.8	5.8	3.4	1	1	1		1	1	1	1	1.43575	High	3.19963	0.00179	0.0141	12.63	3.19963
[K].TEVVNETASDTSNGILDDTKDKDEAQVNEDK.[H]	4xTMT6plex [N-Term; K20; K22; K31]; 2xPhospho [T/S]	PBANKA_103160 2xPhospho [T280(87.5); S/T]	1	11	PBANKA_103160	ribosome maturation protein SBDS, putative	PBANKA_103160 [274-304]	2	4457.13	T7(Phospho): 87.48; S9(Phospho): 48.87	85.9	117.3	85.2	114.1	98.3	105.7	114.9	78.6	41.9	57.2	41.6	55.7	48	51.6	56.1	38.4	22.9	34.9	27	39.1	48	44.6	54.3	29.8	3	3	3	3	3	3	3	3	3.16962	High	-1.25134	5.957e-05	0.0002847	31.69	-1.25134
[K].EFNDGSTTNESDDDRESEYEDSDENEEIK.[L]	2xTMT6plex [N-Term; K29]; 1xDeamidated [N25]; 1xPhospho [S/T/Y]		1	1	PBANKA_114590	conserved rodent malaria protein, unknown function	PBANKA_114590 [47-75]	1	3937.58	S6(Phospho): 14.29; T7(Phospho): 14.29; T8(Phospho): 14.29; S11(Phospho): 14.29; S17(Phospho): 14.29; Y19(Phospho): 14.29; S22(Phospho): 14.29		181.7	86.5	52.6	109.1	168.9	122.6	78.5		11.3	5.4	3.3	6.8	10.5	7.6	4.9		6.9	3.5	2.3	6.8	9.1	7.4	3.8		1	1	1	1	1	1	1	1.08851	High	6.04568	0.007914	0.06813
[K].NETNSIDDNNNNNNDKNNR.[Y]	2xTMT6plex [N-Term; K16]; 2xDeamidated [N13; N14]; 1xPhospho [S5(96.1)]	PBANKA_070380 1xPhospho [S630(96.1)]	1	1	PBANKA_070380	conserved Plasmodium protein, unknown function	PBANKA_070380 [626-644]	1	2759.19	S5(Phospho): 96.14	74.7	54.2	66.2	136.5	132.2	112.1	109.2	114.9	6.8	4.9	6	12.4	12	10.2	9.9	10.4	3.7	3	3.9	8.7	12	8.8	9.6	8.1	1	1	1	1	1	1	1	1	1.88294	High	0.429328	0.0009311	0.007327
[K].IDHSNSILSR.[K]	1xTMT6plex [N-Term]; 2xPhospho [S6(99.9); S9(100)]	PBANKA_123710 2xPhospho [S7527(99.5); S]	1	4	PBANKA_123710	conserved Plasmodium protein, unknown function	PBANKA_123710 [7519-7528]	0	1530.69	S6(Phospho): 99.88; S9(Phospho): 100	88.7	118	81.3	111.8	79.2	106.4	92.6	122	54.8	72.8	50.2	69.1	48.9	65.7	57.2	75.3	29.9	44.4	32.6	48.5	48.9	56.8	55.4	58.5	1	2	2	2	2	2	2	2	2.75352	High	-0.0191554	0.0006943	0.004088	21.14	-0.0191554
[K].SIHGINQDEFDSNSK.[N]	2xTMT6plex [N-Term; K15]; 1xPhospho [S1(100)]	PBANKA_080320 1xPhospho [S1473(100)]	1	2	PBANKA_080320	inositol-phosphate phosphatase, putative	PBANKA_080320 [1473-1487]	0	2229.06	S1(Phospho): 100	101.7	103.2	72	131.8	82.8	99.5	104.6	104.3	22	22.3	15.6	28.5	17.9	21.5	22.6	22.5	12	13.6	10.1	20	17.9	18.6	21.9	17.5	1	1	1	1	1	1	1	1	3.2662	High	1.65206	0.0001087	0.0005831	38.24	1.65206
[K].IMDLNSTNSYK.[N]	2xTMT6plex [N-Term; K11]; 1xOxidation [M2]; 1xPhospho [S9(77.5)]	PBANKA_030180 1xPhospho [S221]	1	1	PBANKA_030180	conserved Plasmodium protein, unknown function	PBANKA_030180 [213-223]	0	1839.9	S9(Phospho): 77.51	72.2	170.3	182.2	174	42.1	85.1	35.3	38.9	5.5	13	13.9	13.2	3.2	6.5	2.7	3	3	7.9	9	9.3	3.2	5.6	2.6	2.3	1	1	1	1	1	1	1	1	1.15758	Low	1.03297	0.06643	0.5372	25.46	1.03297
[K].NKEDSTNDDNSNLNGNNSNVNNSVNNESNSENK.[R]	3xTMT6plex [N-Term; K2; K33]; 2xDeamidated [N]		1	6	PBANKA_122840	mannose-6-phosphate isomerase, putative	PBANKA_122840 [148-180]	1	4284.96		81.2	119.6	89	109.7	98.6	116	74.7	111.2	13.9	20.5	15.2	18.8	16.9	19.9	12.8	19.1	7.6	12.5	9.9	13.2	16.9	17.2	12.4	14.8	1	1	1	1	1	1	1	1	3.19166	High	4.15386	0	4.523e-06	45.15	4.15386
[K].KNESENMDQENYNEISLNEELVAEGLAK.[V]	3xTMT6plex [N-Term; K1; K28]; 1xOxidation [M7]; 1xPhospho [S4(100)]	PBANKA_091230 1xPhospho [S509(100)]	1	4	PBANKA_091230	tudor staphylococcal nuclease, putative (TSN)	PBANKA_091230 [506-533]	1	3993.92	S4(Phospho): 99.99	54.1	106.1	110.4	116.1	107.6	133.3	100.9	71.5	7.7	15.1	15.7	16.5	15.3	19	14.4	10.2	4.2	9.2	10.2	11.6	15.3	16.4	13.9	7.9	1	1	1	1	1	1	1	1	4.01393	High	-4.00664	0	5.879e-05	41.07	-4.00664
[K].SERSVDTEENK.[N]	2xTMT6plex [N-Term; K11]; 2xPhospho [T7; S]	PBANKA_091750 2xPhospho [S24(98); T27(100)]	1	1	PBANKA_091750	structural maintenance of chromosome protein, putative	PBANKA_091750 [21-31]	1	1911.85		74.2	108	104.8	133.7	107.6	103.5	119.4	48.7	30.4	44.3	43	54.8	44.1	42.4	48.9	20	16.6	27	27.9	38.5	44.1	36.7	47.4	15.5	1	1	1	1	1	1	1	1	2.92144	High	0.135188	0.002152	0.01667	13.85	0.135188
[K].DVGISNNNDNIELNEGNQDSHSNIDDIKDGDNK.[K]	3xTMT6plex [N-Term; K28; K33]; 1xDeamidated [N]		1	3	PBANKA_143240	perforin-like protein 2 (PLP2)	PBANKA_143240 [404-436]	1	4301.06		42.1	105.9	106.3	94	103.1	102.1	135.6	110.8	5.7	14.3	14.3	12.7	13.9	13.8	18.3	14.9	3.1	8.7	9.3	8.9	13.9	11.9	17.7	11.6	1	1	1	1	1	1	1	1	3.50272	High	6.26997	0	3.553e-05	39.84	6.26997
[K].DVNHMNNPNNIYGNSHR.[S]	1xTMT6plex [N-Term]; 1xDeamidated [N14]; 1xOxidation [M5]		1	2	PBANKA_051280	merozoite TRAP-like protein, putative (MTRAP)	PBANKA_051280 [478-494]	0	2242.03		86.2	106.6	48.3	73.4	71.7	178.7	145.7	89.4	3.8	4.8	2.2	3.3	3.2	8	6.5	4	2.1	2.9	1.4	2.3	3.2	6.9	6.3	3.1	1	1	1	1	1	1	1	1	1.66866	High	0.364476	0.000861	0.005978	22.43	0.364476
[K].EGNPVEEGNVETPSTSLIEDDYNNK.[S]	2xTMT6plex [N-Term; K25]; 1xPhospho [S/T/Y]; 3xDeamidated [N9; N]		1	13	PBANKA_091020	protein phosphatase 2C, putative	PBANKA_091020 [187-211]	0	3291.47		85.8	105.5	90.4	132.6	100.3	120.8	101	63.6	16.7	20.5	17.6	25.8	19.5	23.5	19.6	12.4	9.1	12.5	11.4	18.1	19.5	20.3	19	9.6	2	2	2	2	2	2	2	2	2.70151	High	10.7596	8.7e-05	0.0004722	37.27	10.7596
[K].GIESETELPSDLLSK.[Q]	2xTMT6plex [N-Term; K15]; 1xPhospho [S4(100)]	PBANKA_094310 1xPhospho [S1973(100)]	1	8	PBANKA_094310	CCR4-NOT transcription complex subunit 1, putative (NOT1)	PBANKA_094310 [1970-1984]	0	2156.11	S4(Phospho): 100	61.7	109.6	91.2	96.6	103.2	115.4	105.8	116.4	41.9	74.5	61.9	65.6	70.1	78.4	71.9	79.1	22.9	45.4	40.2	46.1	70.1	67.8	69.6	61.4	3	3	3	3	3	3	3	3	3.86983	High	1.2543	3.638e-05	0.0001644	38.65	1.2543
[K].AANENYNNNNTTSEENATTSETPAEK.[K]	2xTMT6plex [N-Term; K26]; 2xDeamidated [N]		1	13	PBANKA_143920	polyadenylate-binding protein, putative (PABP)	PBANKA_143920 [276-301]	0	3274.49		66.2	88.9	50.1	67.9	126.5	94.5	156	149.9	9.2	12.3	6.9	9.4	17.5	13.1	21.6	20.7	5	7.5	4.5	6.6	17.5	11.3	20.9	16.1	2	2	2	2	2	2	2	2	1.91369	High	0.112673	8.7e-05	0.000447	39.42	0.112673
[K].NEENASEIGLNK.[E]	2xTMT6plex [N-Term; K12]; 1xPhospho [S6(100)]	PBANKA_145720 1xPhospho [S1258(100)]	1	4	PBANKA_145720	double C2-like domain-containing protein, putative (DOC2)	PBANKA_145720 [1253-1264]	0	1855.92		88.8	105.6	94.9	141.7	113.3	103.7	105.6	46.4	112.8	134.2	120.6	180	144	131.7	134.1	59	61.6	81.8	78.3	126.4	144	113.9	129.9	45.8	2	2	2	2	2	2	2	2	3.45209	High	1.07479	0	7.995e-05	54.48	1.07479
[R].SIDNLLEETNK.[K]	2xTMT6plex [N-Term; K11]; 1xPhospho [S1(100)]	PBANKA_080210 1xPhospho [S565(100)]	1	2	PBANKA_080210	phosphoinositide-binding protein, putative	PBANKA_080210 [565-575]	0	1813.93		80.9	91.9	92.4	141.7	92.3	96	119.1	85.7	12.3	13.9	14	21.5	14	14.6	18.1	13	6.7	8.5	9.1	15.1	14	12.6	17.5	10.1	1	1	1	1	1	1	1	1	2.82845	High	-3.45025	0.000388	0.001797	28.68	-3.45025
[K].KEDEESTNANSYIK.[E]	3xTMT6plex [N-Term; K1; K14]; 1xPhospho [S6(97)]	PBANKA_120490 1xPhospho [S178(97)]	1	2	PBANKA_120490	conserved Plasmodium protein, unknown function	PBANKA_120490 [173-186]	1	2395.2	S6(Phospho): 97	85.9	115.5	90.6	122	102.3	113.1	106.9	63.7	144.1	193.9	152.2	204.9	171.7	189.9	179.5	107	78.7	118.2	98.8	143.9	171.7	164.2	173.8	83.1	1	1	1	1	1	1	1	1	4.40248	High	0.521738	0	7.427e-05	8.97	0.521738
[K].NYLDHNNNNNNDNNNDK.[N]	2xTMT6plex [N-Term; K17]		1	4	PBANKA_123680	conserved Plasmodium protein, unknown function	PBANKA_123680 [196-212]	0	2504.16		80.4	79.6	79.1	135.1	105.5	101.3	102.1	116.8	48.4	47.9	47.6	81.3	63.5	60.9	61.4	70.3	26.4	29.2	30.9	57.1	63.5	52.7	59.5	54.6	2	2	2	2	2	2	2	2	4.18683	High	1.40901	0	4.549e-06	56.48	1.40901
[K].NDEHNENDTELSKDIDEFESDQDDDNK.[I]	3xTMT6plex [N-Term; K13; K27]; 2xPhospho [T9(93.7); S12(79.3)]	PBANKA_103640 2xPhospho [T536(93.7); S539(79.3)]	1	4	PBANKA_103640	BOP1-like protein, putative	PBANKA_103640 [528-554]	1	4057.7	T9(Phospho): 93.7; S12(Phospho): 79.29	71.5	115.6	135.2	162.1	87.8	80.2	125.4	22.3	6.6	10.7	12.5	15	8.1	7.4	11.6	2.1	3.6	6.5	8.1	10.5	8.1	6.4	11.2	1.6	1	1	1	1	1	1	1	1	3.25404	High	-2.22578	0	4.65e-05	38.8	-2.22578
[K].ENSYIDIQR.[N]	1xTMT6plex [N-Term]; 1xPhospho [Y/S]		1	1	PBANKA_081700	sugar transporter, putative	PBANKA_081700 [17-25]	0	1446.68		127.5	137.8	90.9	155.7	70.4	73.5	76.6	67.7	33.7	36.4	24	41.2	18.6	19.4	20.2	17.9	18.4	22.2	15.6	28.9	18.6	16.8	19.6	13.9	1	1	1	1	1	1	1	1	1.89873	High	0.369409	0.004156	0.0351	13.06	0.369409
[K].DILLPNDTEDENK.[N]	2xTMT6plex [N-Term; K13]; 1xPhospho [T8(100)]; 1xDeamidated [N6]	PBANKA_010530 1xPhospho [T186(100)]	1	3	PBANKA_010530	conserved Plasmodium protein, unknown function	PBANKA_010530 [179-191]	0	2054.99		38.4	103.3	135.5	130.9	130.9	106.3	113.5	41.2	3.8	10.3	13.6	13.1	13.1	10.6	11.4	4.1	2.1	6.3	8.8	9.2	13.1	9.2	11	3.2	1	1	1	1	1	1	1	1	1.64162	High	9.11063	0.001804	0.01412	29.71	4.65549
[R].NSERNNSEYGNRK.[N]	2xTMT6plex [N-Term; K13]; 2xDeamidated [N5; N6]; 1xPhospho [Y9(81.2)]	PBANKA_142500 1xPhospho [Y552(90.2)]	1	1	PBANKA_142500	RNA-binding protein, putative	PBANKA_142500 [544-556]	2	2107.98	Y9(Phospho): 90.22	88.1	91	41	82.2	108.8	123.2	128.4	137.2	11.9	12.3	5.5	11.1	14.7	16.7	17.3	18.5	6.5	7.5	3.6	7.8	14.7	14.4	16.8	14.4	1	1	1	1	1	1	1	1	2.37567	High	0.605006	0.007355	0.06238
[K].SNDGYSDKEYDK.[N]	3xTMT6plex [N-Term; K8; K12]; 1xPhospho [Y/S]		1	1	PBANKA_110940	phosphatidylinositol 4-kinase, putative (PI4K)	PBANKA_110940 [1057-1068]	1	2188.04	Y5(Phospho): 49.96; S6(Phospho): 49.96	96.1	98	82.8	142.6	106.7	100.4	107.2	66.2	64.5	65.8	55.6	95.7	71.6	67.4	72	44.4	35.2	40.1	36.1	67.2	71.6	58.3	69.7	34.5	1	1	1	1	1	1	1	1	1.64518	High	-0.141669	0.005107	0.04352
[K].DIETEKNDNNEEGSSNDQVKPENEEK.[A]	4xTMT6plex [N-Term; K6; K20; K26]; 1xPhospho [S15(78.6)]	PBANKA_142500 1xPhospho [S40(78.6)]	1	9	PBANKA_142500	RNA-binding protein, putative	PBANKA_142500 [26-51]	1	3987.91		91.1	113.7	95.6	137.3	99.4	97.2	100.5	65	198.9	248.2	208.7	299.6	217	212.2	219.3	141.9	108.6	151.3	135.5	210.4	217	183.5	212.4	110.2	4	4	4	4	4	4	4	4	5.88084	High	-2.35161	0	1.025e-06	40.83	-2.17988
[R].ISSNNNTNK.[R]	2xTMT6plex [N-Term; K9]; 1xPhospho [T7(94.9)]; 1xDeamidated [N]	PBANKA_102960 1xPhospho [S351(91.2)]	1	4	PBANKA_102960	conserved Plasmodium protein, unknown function	PBANKA_102960 [349-357]	0	1530.76		129.3	160.5	134.9	194.6	51.2	47	42.5	39.8	161.4	200.3	168.3	242.8	63.9	58.6	53.1	49.7	88.1	122.1	109.3	170.5	63.9	50.7	51.4	38.6	2	2	2	2	2	2	2	2	3.02808	High	0.0866544	0.006563	0.05776	19.57	-0.961184
[K].EGSDPQTNANK.[G]	2xTMT6plex [N-Term; K11]; 1xPhospho [S3(100)]	PBANKA_132300 1xPhospho [S18(100)]	1	2	PBANKA_132300	conserved Plasmodium protein, unknown function	PBANKA_132300 [16-26]	0	1698.81	S3(Phospho): 100	102.1	99	86.6	154.8	94.7	109.8	97.1	56	62.5	60.5	53	94.7	57.9	67.2	59.4	34.2	34.1	36.9	34.4	66.5	57.9	58.1	57.5	26.6	1	1	1	1	1	1	1	1	3.54308	High	0.00958373	0.0006943	0.003447	24.45	0.00958373
[K].NISYSNDNTK.[K]	2xTMT6plex [N-Term; K10]; 1xPhospho [T9(83.5)]		1	6	PBANKA_090690	conserved Plasmodium protein, unknown function	PBANKA_090690 [2173-2182]	0	1693.82	T9(Phospho): 83.5	92.4	125.5	97.7	129.8	88.8	91.5	93.1	81.2	121.4	164.9	128.3	170.6	116.7	120.1	122.4	106.6	66.3	100.5	83.3	119.8	116.7	103.9	118.5	82.8	2	2	2	2	2	2	2	2	3.54264	High	0.436252	0.0006943	0.003657	36.6	0.436252
[R].FHENEVITDDINDEEIDIDQINNINNNNVIAK.[N]	2xTMT6plex [N-Term; K32]		1	2	PBANKA_083260	proteasome subunit beta type-6, putative	PBANKA_083260 [105-136]	0	4183.08		61	126	87	72.2	97.1	115.6	127.2	113.8	4.2	8.7	6	5	6.7	8	8.8	7.9	2.3	5.3	3.9	3.5	6.7	6.9	8.5	6.1	1	1	1	1	1	1	1	1	3.89822	High	2.91962	0	2.332e-05	43.38	2.91962
[R].ILDDDKSQDSSFNDHLHK.[K]	3xTMT6plex [N-Term; K6; K18]; 3xPhospho [S7(100); S10(100); S11(100)]	PBANKA_140350 3xPhospho [S491(100); S494(100); S495(100)]	1	1	PBANKA_140350	conserved Plasmodium protein, unknown function	PBANKA_140350 [485-502]	1	3041.37	S7(Phospho): 100; S10(Phospho): 100; S11(Phospho): 100	74.1	101.5	87.4	115.3	98.2	107.1	108.1	108.4	15.9	21.8	18.8	24.8	21.1	23	23.2	23.3	8.7	13.3	12.2	17.4	21.1	19.9	22.5	18.1	1	1	1	1	1	1	1	1	3.03839	High	1.06446	0.001283	0.009967
[K].TIPEGSQNVDGSVYSISTNISTSGR.[V]	1xTMT6plex [N-Term]; 1xDeamidated [Q/N]; 1xPhospho [S/T/Y]		1	8	PBANKA_144820	asparagine/aspartate rich protein, putative	PBANKA_144820 [445-469]	0	2879.35	S21(Phospho): 47.13; S23(Phospho): 47.13	60	85.4	74.2	96.1	135	91.4	71.7	186.2	3.1	4.4	3.9	5	7	4.7	3.7	9.7	1.7	2.7	2.5	3.5	7	4.1	3.6	7.5	1	1	1	1	1	1	1	1	3.48936	High	1.25678	3.638e-05	0.0001589	50.1	1.25678
[R].RQSGNYNNPDLK.[D]	2xTMT6plex [N-Term; K12]; 1xPhospho [S3(100)]; 1xDeamidated [N/Q]	PBANKA_040600 1xPhospho [S289(100)]	1	4	PBANKA_040600	conserved Plasmodium protein, unknown function	PBANKA_040600 [287-298]	1	1944.96		123	155.1	117.1	167.2	57.7	63.4	58.5	58.1	111.7	140.9	106.4	151.9	52.4	57.6	53.2	52.8	61	85.9	69.1	106.7	52.4	49.8	51.5	41	2	2	2	2	2	2	2	2	3.22116	High	10.683	0.007275	0.06173	21.39	0.32718
[K].ENNNTNHQNVHIEDQETQQNK.[Y]	2xTMT6plex [N-Term; K21]		1	4	PBANKA_130680	protein transport protein SEC7, putative (SEC7)	PBANKA_130680 [1862-1882]	0	2992.45		76.1	111.8	98.9	123.1	105.8	106.5	105.8	71.9	22.9	33.6	29.7	37	31.8	32	31.8	21.6	12.5	20.5	19.3	26	31.8	27.7	30.8	16.8	2	2	2	2	2	2	2	2	3.16934	High	1.59958	0	3.68e-05	31.34	-1.17433
[K].NTYEDSNLIQSLSK.[N]	2xTMT6plex [N-Term; K14]; 1xDeamidated [Q/N]; 1xPhospho [S13(100)]	PBANKA_102550 1xPhospho [S1678(100)]	1	3	PBANKA_102550	NOT family protein, putative	PBANKA_102550 [1666-1679]	0	2151.06	S13(Phospho): 99.99	119.9	172.4	120.8	150.8	59.6	61.7	62.4	52.5	30.6	44	30.8	38.4	15.2	15.7	15.9	13.4	16.7	26.8	20	27	15.2	13.6	15.4	10.4	1	1	1	1	1	1	1	1	3.35294	High	6.87724	0	0.0001191	51.07	6.87724
[K].GHNNTIANQNGVTTSNNK.[D]	2xTMT6plex [N-Term; K18]; 1xDeamidated [Q/N]		1	3	PBANKA_093960	polyadenylate-binding protein-interacting protein 1, putative (PAIP1)	PBANKA_093960 [1389-1406]	0	2343.21		57	116.6	102.1	96.7	117.4	88.7	85.8	135.7	7.1	14.6	12.8	12.1	14.7	11.1	10.7	17	3.9	8.9	8.3	8.5	14.7	9.6	10.4	13.2	1	1	1	1	1	1	1	1	3.87615	High	2.22947	0	6.122e-07	70.95	2.22947
[K].NNTVDTVDDIEEGNDNVVGENK.[N]	2xTMT6plex [N-Term; K22]		1	2	PBANKA_130500	conserved Plasmodium protein, unknown function	PBANKA_130500 [28-49]	0	2848.38		100	99.5	75.3	136	95.5	94.7	94	105	26.4	26.2	19.9	35.9	25.2	25	24.8	27.7	14.4	16	12.9	25.2	25.2	21.6	24	21.5	1	1	1	1	1	1	1	1	3.28216	High	2.61464	0	1.482e-07	58.95	2.61464
[K].EKDNNSGEENSNSEQK.[L]	3xTMT6plex [N-Term; K2; K16]; 2xPhospho [S6(100); S]; 1xDeamidated [N]	PBANKA_093720.2 2xPhospho [S428(100); S]	2	8	PBANKA_093720.2	asparagine-rich antigen, putative	PBANKA_093720.2 [423-438]	1	2657.16		85.7	99.2	85.7	130.6	99.1	113.5	106.3	79.8	106.4	123.2	106.4	162.2	123	141	132	99.1	58.1	75.1	69.1	113.9	123	121.9	127.8	77	4	4	4	4	4	4	4	4	2.93414	High	0.533967	0.001818	0.01423	35.75	0.533967
[R].YSQNINNNNNNNNNNNNMR.[D]	1xTMT6plex [N-Term]; 4xDeamidated [N]; 1xOxidation [M18]		1	17	PBANKA_020480	secreted ookinete protein, putative (PSOP24)	PBANKA_020480 [746-764]	0	2529.05		34.1	62.3	55.3	57	149.8	146.8	119.7	175	4.9	9	8	8.3	21.7	21.3	17.3	25.4	2.7	5.5	5.2	5.8	21.7	18.4	16.8	19.7	1	2	2	2	2	2	2	2						29.73	8.47472
[K].TTEENGNSNFNNNK.[Y]	2xTMT6plex [N-Term; K14]; 1xDeamidated [N5]; 1xPhospho [S8(89.4)]	PBANKA_101140 1xPhospho [S316(89.4)]	1	2	PBANKA_101140	DNA topoisomerase II, putative	PBANKA_101140 [309-322]	0	2121.95	S8(Phospho): 89.44	77.6	87.5	85	130.7	111.3	105.1	121.5	81.3	25.5	28.7	27.9	42.9	36.5	34.5	39.9	26.7	13.9	17.5	18.1	30.1	36.5	29.8	38.6	20.7	1	1	1	1	1	1	1	1	3.32319	High	1.19887	0	7.914e-05	55.04	1.19887
[R].FHQELSDITVTEEEENEEYK.[K]	2xTMT6plex [N-Term; K20]; 2xPhospho [S6(100); T/Y]	PBANKA_135830 2xPhospho [S1339(100); T1342(96.6)]	1	2	PBANKA_135830	conserved Plasmodium protein, unknown function	PBANKA_135830 [1334-1353]	0	3087.35		51.6	104.9	106.4	106.9	95.5	128.2	102.2	104.3	6	12.3	12.5	12.5	11.2	15	12	12.2	3.3	7.5	8.1	8.8	11.2	13	11.6	9.5	1	1	1	1	1	1	1	1	2.32578	High	-0.197037	0.0002156	0.001074	31.72	-0.197037
[K].EGATSNNEQGNTTK.[V]	2xTMT6plex [N-Term; K14]		1	2	PBANKA_031330	MtN3-like protein	PBANKA_031330 [164-177]	0	1908.97		74.3	80.3	81.8	129.4	170.6	97	127	39.6	5.3	5.7	5.9	9.3	12.2	6.9	9.1	2.8	2.9	3.5	3.8	6.5	12.2	6	8.8	2.2	1	1	1	1	1	1	1	1	2.57672	High	0.332393	0	5.659e-05	51.85	0.332393
[K].TSFPNNENNSR.[S]	1xTMT6plex [N-Term]; 1xPhospho [S10(100)]	PBANKA_123330 1xPhospho [S84(100)]	1	1	PBANKA_123330	ATP-dependent RNA helicase DDX23, putative (DDX23)	PBANKA_123330 [75-85]	0	1588.7	S10(Phospho): 99.97	89.1	106.6	82.2	122.5	95.1	85.6	111.5	107.5	20.7	24.8	19.1	28.5	22.1	19.9	25.9	25	11.3	15.1	12.4	20	22.1	17.2	25.1	19.4	1	1	1	1	1	1	1	1	1.63549	High	0.647167	0.005381	0.04686
[K].NEDDDSEDVDKVNEQYK.[E]	3xTMT6plex [N-Term; K11; K17]; 1xPhospho [S6(100)]	PBANKA_090670 1xPhospho [S882(100)]	1	5	PBANKA_090670	conserved Plasmodium protein, unknown function	PBANKA_090670 [877-893]	1	2809.3		93.8	93.2	93.7	157.8	97.2	99.5	109.4	55.4	110.8	110.1	110.7	186.4	114.9	117.6	129.3	65.4	60.5	67.1	71.9	130.9	114.9	101.7	125.2	50.8	2	2	2	2	2	2	2	2	5.02061	High	-0.558507	0	1.023e-05	41.09	-0.558507
[K].INLVSHNNFLSSEEENEKR.[E]	2xTMT6plex [N-Term; K18]; 2xPhospho [S]	PBANKA_133770 2xPhospho [S320(100); S321(100)]	1	2	PBANKA_133770	conserved Plasmodium protein, unknown function	PBANKA_133770 [310-328]	1	2877.36		75.9	99.9	81.5	110.5	130.5	108.7	99.2	93.7	21.8	28.7	23.4	31.8	37.5	31.2	28.5	26.9	11.9	17.5	15.2	22.3	37.5	27	27.6	20.9	1	1	1	1	1	1	1	1	4.58598	High	-2.03566	0	1.71e-05	34.47	-2.03566
[K].LDGAITDSNDNQISNDENDSKK.[K]	3xTMT6plex [N-Term; K21; K22]; 2xPhospho [S/T]; 1xDeamidated [N/Q]	PBANKA_134870 2xPhospho [T251(81.8); S259(98.8)]	1	4	PBANKA_134870	conserved Plasmodium protein, unknown function	PBANKA_134870 [246-267]	1	3241.48		92.2	97.5	89.4	146.3	99.3	114	93.8	67.5	13.2	13.9	12.8	20.9	14.2	16.3	13.4	9.7	7.2	8.5	8.3	14.7	14.2	14.1	13	7.5	1	1	1	1	1	1	1	1	2.38937	High	8.39604	0.001506	0.01143	17.18	8.39604
[K].TNNDSTIFEN.[-]	1xTMT6plex [N-Term]; 1xPhospho [T/S]	PBANKA_092390 1xPhospho [S137(99.3)]	1	4	PBANKA_092390	U6 snRNA-associated Sm-like protein LSm1, putative (LSM1)	PBANKA_092390 [133-142]	0	1463.63		96.6	97.2	61.2	114.1	119.9	125.2	94.1	91.7	28.2	28.4	17.9	33.3	35	36.5	27.5	26.8	15.4	17.3	11.6	23.4	35	31.6	26.6	20.8	2	2	2	2	2	2	2	2	1.76986	High	1.4222	0.002364	0.01904	29.1	1.4222
[K].HFNEYNHNENTGNNNIGVNDDNMGNNK.[F]	2xTMT6plex [N-Term; K27]; 1xDeamidated [N]; 1xOxidation [M23]		1	12	PBANKA_124390	conserved Plasmodium protein, unknown function	PBANKA_124390 [562-588]	0	3564.58		58.4	108.4	101.3	105.5	117.7	108.2	104.8	95.7	19.8	36.7	34.3	35.7	39.9	36.7	35.5	32.4	10.8	22.4	22.3	25.1	39.9	31.7	34.4	25.2	2	2	2	2	2	2	2	2	3.3083	High	0.595252	0	9.73e-06	47.37	0.595252
[K].LEGNSAETTATTANNETESINDNNENHVK.[E]	2xTMT6plex [N-Term; K29]; 1xPhospho [T/S]; 4xDeamidated [N21; N]	PBANKA_142420 1xPhospho [S/T]	1	7	PBANKA_142420	conserved Plasmodium protein, unknown function	PBANKA_142420 [134-162]	0	3659.61		54.4	111.2	84.6	74.7	104.9	110.5	115.5	144	11	22.5	17.1	15.1	21.2	22.3	23.3	29.1	6	13.7	11.1	10.6	21.2	19.3	22.6	22.6	2	2	2	2	2	2	2	2						31.64	11.7504
[K].SPSENSSPSK.[T]	2xTMT6plex [N-Term; K10]; 1xPhospho [S3(96.7)]	PBANKA_121930 1xPhospho [S570(96.7)]	1	8	PBANKA_121930	heat shock protein 110, putative (HSP110c)	PBANKA_121930 [568-577]	0	1557.76		84.8	105.3	93.1	132.7	89.4	101.1	101.8	91.9	151.7	188.3	166.5	237.4	159.9	180.9	182.2	164.4	82.8	114.8	108.1	166.7	159.9	156.4	176.4	127.7	4	4	4	4	4	4	4	4	3.08983	High	0.12376	0.002954	0.02523	33.09	1.2992
[K].GSNSFNDDLK.[N]	2xTMT6plex [N-Term; K10]; 1xPhospho [S]	PBANKA_112250 1xPhospho [S477(100)]	1	4	PBANKA_112250	conserved Plasmodium protein, unknown function	PBANKA_112250 [474-483]	0	1634.78		114.8	156.9	108.4	141.6	77.7	57.1	71.6	71.8	171.6	234.6	162	211.7	116.2	85.3	107	107.4	93.7	143	105.2	148.7	116.2	73.8	103.6	83.4	2	2	2	2	2	2	2	2	2.91801	High	0.313567	0.0002967	0.001285	30.25	0.313567
[R].KLEENPVDMSQEENNVSDNK.[Y]	3xTMT6plex [N-Term; K1; K20]; 1xDeamidated [N/Q]; 1xOxidation [M9]; 2xPhospho [S10(100); S17(100)]	PBANKA_130170 2xPhospho [S393(100); S400(100)]	1	5	PBANKA_130170	splicing factor 3A subunit 1, putative (SF3A1)	PBANKA_130170 [384-403]	1	3183.44	S10(Phospho): 100; S17(Phospho): 100	50.5	106.7	99.1	92.7	128	126	109.6	87.4	7.1	15.1	14	13.1	18.1	17.8	15.5	12.4	3.9	9.2	9.1	9.2	18.1	15.4	15	9.6	1	1	1	1	1	1	1	1	2.62531	High	5.51961	0.0004268	0.001842	34.91	5.51961
[K].NIDSIHFR.[K]	1xTMT6plex [N-Term]; 1xPhospho [S4]	PBANKA_100340 1xPhospho [S1606(100)]	1	1	PBANKA_100340	lysine decarboxylase, putative (UIS14)	PBANKA_100340 [1603-1610]	0	1310.65		107.3	90.9	70.7	148.8	121.9	140.9	60.5	59.1	6.8	5.7	4.5	9.4	7.7	8.9	3.8	3.7	3.7	3.5	2.9	6.6	7.7	7.7	3.7	2.9	1	1	1	1	1	1	1	1	1.66278	High	-3.41899	0.00871	0.0757	12.74	-3.41899
[K].DENSENNNELNQLNNEMNNEQNSEVNNED.[-]	1xTMT6plex [N-Term]; 1xOxidation [M17]		1	2	PBANKA_051750	bromodomain protein, putative	PBANKA_051750 [461-489]	0	3652.5		68.3	77	74.1	114.8	123.9	150.2	145.3	46.5	5.7	6.4	6.2	9.5	10.3	12.5	12.1	3.9	3.1	3.9	4	6.7	10.3	10.8	11.7	3	1	1	1	1	1	1	1	1	2.09655	High	-2.93349	0.0008012	0.004723	29.5	-2.93349
[K].EDNNSNPDLNLNEQSK.[N]	2xTMT6plex [N-Term; K16]; 1xPhospho [S5(100)]	PBANKA_051270 1xPhospho [S13(100)]	1	15	PBANKA_051270	conserved Plasmodium protein, unknown function	PBANKA_051270 [9-24]	0	2369.1		97.4	87.3	88.2	160.7	151.4	79.5	62.7	72.9	294.3	263.8	266.5	485.5	457.5	240.3	189.4	220.3	160.7	160.8	173	341	457.5	207.8	183.4	171.1	7	7	7	7	7	7	7	7	4.69809	High	-0.165927	0	8.162e-07	47.89	-0.165927
[K].HLDNHSNISNTNEEAIYNSK.[K]	2xTMT6plex [N-Term; K20]; 2xPhospho [S6(83.6); Y/S/T]; 2xDeamidated [N]		1	11	PBANKA_140350	conserved Plasmodium protein, unknown function	PBANKA_140350 [564-583]	0	2920.28		81.3	125.4	91.2	105.4	82	108.4	94.3	112	13.2	20.3	14.8	17.1	13.3	17.6	15.3	18.2	7.2	12.4	9.6	12	13.3	15.2	14.8	14.1	1	1	1	1	1	1	1	1	1.70318	High	6.23498	0.001183	0.009101	27.64	6.23498
[K].GNDGQTGNVVNSEQDQDSNMNK.[R]	2xTMT6plex [N-Term; K22]; 1xOxidation [M20]; 2xPhospho [S12(99); S18(99)]	PBANKA_090690 2xPhospho [S521(99); S527(99)]	1	2	PBANKA_090690	conserved Plasmodium protein, unknown function	PBANKA_090690 [510-531]	0	2985.23	S12(Phospho): 98.95; S18(Phospho): 98.95	104.5	118	72.6	119.2	125.8	88.2	89.6	82.2	16.9	19	11.7	19.2	20.3	14.2	14.5	13.3	9.2	11.6	7.6	13.5	20.3	12.3	14	10.3	1	1	1	1	1	1	1	1	2.01663	High	-0.320835	0.0004851	0.002301	28.91	-0.320835
[M].AAIDHNVQDELVDYEDDDNMLDNK.[D]	1xTMT6plex [K24]; 1xAcetyl [N-Term]; 1xDeamidated [N19]; 1xOxidation [M20]	PBANKA_030680 1xAcetyl [N-Term]	1	2	PBANKA_030680	ATP-dependent RNA helicase UAP56, putative (UAP56)	PBANKA_030680 [2-25]	0	3079.35		63.1	105.1	88.5	97.1	104.1	99.4	124	118.8	18.1	30.2	25.4	27.9	29.9	28.6	35.6	34.1	9.9	18.4	16.5	19.6	29.9	24.7	34.5	26.5	2	2	2	2	2	2	2	2						47.99	5.60236
[R].SLDGNGSGPSK.[K]	2xTMT6plex [N-Term; K11]; 1xPhospho [S1(100)]	PBANKA_142430 1xPhospho [S209(100)]	1	8	PBANKA_142430	conserved Plasmodium protein, unknown function	PBANKA_142430 [209-219]	0	1556.77	S1(Phospho): 100	86.8	99.6	91.1	138	89.2	99	95.5	100.8	405	464.7	425.3	644.2	416.2	461.8	445.7	470.5	221.1	283.3	276.1	452.4	416.2	399.4	431.6	365.4	4	4	4	4	4	4	4	4	4.17645	High	0.598669	0	4.023e-05	36.91	0.598669
[K].TNDALNSPVNNNSTIVENGQNTVVVNK.[N]	2xTMT6plex [N-Term; K27]; 3xDeamidated [N/Q]; 1xPhospho [S/T]		1	30	PBANKA_061040	ATPase, putative	PBANKA_061040 [27-53]	0	3396.66	S7(Phospho): 24.63; S13(Phospho): 24.63; T14(Phospho): 24.63; T22(Phospho): 24.63	60.6	100.5	90.5	101.3	87.7	136.8	112.8	109.7	7.3	12.1	10.9	12.2	10.6	16.5	13.6	13.3	4	7.4	7.1	8.6	10.6	14.3	13.2	10.3	1	1	1	1	1	1	1	1	2.61107	High	5.65327	0.0001087	0.0005025	32.14	4.45329
[K].NMSNLGGINK.[L]	2xTMT6plex [N-Term; K10]; 1xOxidation [M2]; 1xPhospho [S3(100)]	PBANKA_080120 1xPhospho [S594(100)]	1	4	PBANKA_080120	erythrocyte membrane-associated antigen, putative	PBANKA_080120 [592-601]	0	1601.81	S3(Phospho): 100	66.9	100.9	87.2	105.1	113.6	108.2	126.7	91.4	16.3	24.6	21.3	25.6	27.7	26.4	30.9	22.3	8.9	15	13.8	18	27.7	22.8	29.9	17.3	1	1	1	1	1	1	1	1	2.53164	High	-1.24154	0.001396	0.0108	22.93	-1.24154
[K].QSNLSSSIQLNNNENDPK.[K]	2xTMT6plex [N-Term; K18]; 1xDeamidated [N]; 1xPhospho [S]		1	18	PBANKA_103160	ribosome maturation protein SBDS, putative	PBANKA_103160 [245-262]	0	2541.22	S5(Phospho): 43.43; S7(Phospho): 43.43	80.7	116.1	89.9	111.8	89.5	98.8	99.3	113.9	46.2	66.4	51.4	63.9	51.2	56.5	56.8	65.2	25.2	40.5	33.4	44.9	51.2	48.9	55	50.6	3	3	3	3	3	3	3	3	2.1604	High	8.41057	0.005231	0.04422	44.08	8.41057
[K].KGNNENENDETDVNDESTEK.[N]	3xTMT6plex [N-Term; K1; K20]; 1xPhospho [T11(99.6)]	PBANKA_121150 1xPhospho [T136(99.6)]	1	2	PBANKA_121150	U3 snoRNA-associated small subunit rRNA processing protein, putative	PBANKA_121150 [126-145]	1	3048.39		54.3	163.1	139.9	95.3	103.2	88.4	111.5	44.3	5.7	17.1	14.6	10	10.8	9.3	11.7	4.6	3.1	10.4	9.5	7	10.8	8	11.3	3.6	1	1	1	1	1	1	1	1	1.80742	High	-0.561863	0.004701	0.03939	24.16	-0.561863
[R].YNNDNQNDQFSK.[R]	2xTMT6plex [N-Term; K12]; 1xPhospho [Y/S]	PBANKA_071210 1xPhospho [S855(100)]	1	2	PBANKA_071210	DNA helicase, putative	PBANKA_071210 [845-856]	0	2024.91		88.2	101.2	93.7	141.4	105.9	70.8	118.8	80	20.1	23.1	21.4	32.3	24.2	16.2	27.2	18.3	11	14.1	13.9	22.7	24.2	14	26.3	14.2	1	1	1	1	1	1	1	1	2.20435	High	0.729795	0.0004607	0.002056	35.1	0.729795
[K].SNQNDSTNDSLYNTSSNNSSNTLEMLK.[K]	2xTMT6plex [N-Term; K27]; 1xOxidation [M25]; 1xPhospho [S/T/Y]		1	33	PBANKA_142510	karyopherin alpha, putative (KARalpha)	PBANKA_142510 [65-91]	0	3532.58	T22(Phospho): 89.08	56.1	90.7	94.3	109.9	107.4	109.9	114.2	117.6	12.3	19.8	20.6	24.1	23.5	24.1	25	25.8	6.7	12.1	13.4	16.9	23.5	20.8	24.2	20	3	3	3	3	3	3	3	3	2.87679	High	-3.50902	0.0003692	0.001705	63.9	-3.31516
[K].NEQESEQENEHKNEDYAK.[K]	3xTMT6plex [N-Term; K12; K18]; 1xPhospho [S5(100)]	PBANKA_090310 1xPhospho [S574(100)]	1	5	PBANKA_090310	nucleolar preribosomal assembly protein, putative	PBANKA_090310 [570-587]	1	2988.38		90.8	104	99.4	149.7	86.8	98.1	108.5	62.8	159.3	182.6	174.5	262.7	152.3	172.2	190.5	110.2	87	111.3	113.3	184.5	152.3	148.9	184.5	85.6	3	3	3	3	3	3	3	3	5.44458	High	0.897493	0	3.109e-06	42.82	0.897493
[K].ENNEMSVK.[G]	2xTMT6plex [N-Term; K8]; 1xOxidation [M5]; 1xPhospho [S6(100)]	PBANKA_121900 1xPhospho [S20(100)]	1	2	PBANKA_121900	heat shock protein 90, putative	PBANKA_121900 [15-22]	0	1504.71	S6(Phospho): 100	79	83.6	110.6	169	83.7	103.7	120.2	50.3	21.2	22.5	29.7	45.4	22.5	27.9	32.3	13.5	11.6	13.7	19.3	31.9	22.5	24.1	31.3	10.5	1	1	1	1	1	1	1	1	1.87046	High	0.571433	0.00731	0.06207	23.56	0.571433
[K].VMNRDEEDNNSDEK.[V]	2xTMT6plex [N-Term; K14]; 1xPhospho [S11(100)]; 1xOxidation [M2]	PBANKA_145460 1xPhospho [S2006(100)]; 1xPhospho [S4015(100)]; 1xPhospho [S6038(100)]; 1xPhospho [S8075(100)]; 1xPhospho [S10140(100)]	1	4	PBANKA_145460	conserved Plasmodium protein, unknown function	PBANKA_145460 [1996-2009]; [2010-2023]; [2024-2037]; [2038-2051]; [2066-2079]	1	2248.98		79.8	102.6	96.4	132.5	102.4	104.4	119.1	62.8	200.6	257.9	242.3	332.9	257.4	262.3	299.2	157.7	109.5	157.2	157.3	233.8	257.4	226.8	289.8	122.5	3	3	3	3	3	3	3	3	2.46694	High	0.000535521	0.007554	0.06392	22	0.000535521
[K].KTPSASDNDSVPPS.[-]	2xTMT6plex [N-Term; K1]; 1xPhospho [S4(89.8)]		1	15	PBANKA_052480	early transcribed membrane protein,small exported protein (SEP1)	PBANKA_052480 [102-115]	1	1939.94	S4(Phospho): 88.33	92.7	94.5	73.6	127.4	147.4	85.4	72.1	106.8	142.3	145	113.1	195.6	226.3	131.1	110.7	164	77.7	88.4	73.4	137.4	226.3	113.4	107.2	127.4	5	5	5	5	5	5	5	5	3.10168	High	0.858248	0.001573	0.01194	43.67	-1.02949
[K].SNKNGNNNASDQEGTEEDSLIIDEESVNQAIR.[E]	2xTMT6plex [N-Term; K3]; 1xPhospho [S/T]; 2xDeamidated [N/Q]		1	7	PBANKA_051650	conserved Plasmodium protein, unknown function	PBANKA_051650 [344-375]	1	4030.84		119.2	70	69.2	182.2	130.2	101.2	67.2	60.7	5.3	3.1	3.1	8.1	5.8	4.5	3	2.7	2.9	1.9	2	5.7	5.8	3.9	2.9	2.1	1	1	1	1	1	1	1	1	1.64772	High	-0.615827	0.004381	0.0364	21.98	3.56338
[K].NNNNESPSIPNHSDNSNDLSNIK.[Y]	2xTMT6plex [N-Term; K23]; 3xPhospho [S8(80.9); S16(84.1); S20(96.6)]	PBANKA_010330 3xPhospho [S1596(86.5); S]	1	4	PBANKA_010330	conserved Plasmodium protein, unknown function	PBANKA_010330 [1581-1603]	0	3222.35	S8(Phospho): 80.89; S16(Phospho): 84.11; S20(Phospho): 96.57	99.9	75	45.4	119.6	119.4	131.2	143.1	66.4	6.8	5.1	3.1	8.1	8.1	8.9	9.7	4.5	3.7	3.1	2	5.7	8.1	7.7	9.4	3.5	1	1	1	1	1	1	1	1	2.04389	High	-0.966742	5.957e-05	0.0002579	29.27	-0.966742
[K].KQYHSPNENDNTHQDSTTDDEER.[K]	2xTMT6plex [N-Term; K1]; 4xPhospho [S5; S16; T17; T18]	PBANKA_061370 4xPhospho [S11; S22; T23; T24]	1	1	PBANKA_061370	RNA-binding protein, putative	PBANKA_061370 [7-29]	1	3538.33		73.5	95.9	75.6	102.3	98.6	113.5	102.8	137.8	14.8	19.4	15.2	20.6	19.9	22.9	20.8	27.8	8.1	11.8	9.9	14.5	19.9	19.8	20.1	21.6	1	1	1	1	1	1	1	1						19.65	0.189037
[K].TEKGNEDENSEDELLYEQAEIDDNENNNDK.[H]	3xTMT6plex [N-Term; K3; K30]; 1xDeamidated [Q/N]		1	3	PBANKA_041170	co-chaperone p23, putative	PBANKA_041170 [242-271]	1	4201.93		93	109.1	51.2	83.5	121.6	136.6	95.8	109.3	10.6	12.5	5.9	9.5	13.9	15.6	10.9	12.5	5.8	7.6	3.8	6.7	13.9	13.5	10.6	9.7	1	1	1	1	1	1	1	1	2.79837	High	3.4718	0.0002581	0.001119	42.74	3.4718
[K].IGDESKSNEEEKPR.[D]	3xTMT6plex [N-Term; K6; K12]; 1xPhospho [S]	PBANKA_130680 1xPhospho [S2980(89.2)]	1	2	PBANKA_130680	protein transport protein SEC7, putative (SEC7)	PBANKA_130680 [2974-2987]	1	2385.23		89.6	117.4	100	135.3	106.4	116.8	101	33.5	44.7	58.6	49.9	67.5	53.1	58.3	50.4	16.7	24.4	35.7	32.4	47.4	53.1	50.4	48.8	13	1	1	1	1	1	1	1	1	2.34979	High	1.71486	0.00852	0.07409	12.65	1.71486
[R].ERSHDSDILEQNR.[Y]	1xTMT6plex [N-Term]; 1xPhospho [S3(100)]	PBANKA_031600 1xPhospho [S143(100)]	1	13	PBANKA_031600	replication factor C subunit 1, putative	PBANKA_031600 [141-153]	1	1907.88		99.3	128	88.8	122.6	90.3	83.7	90.7	96.6	77.1	99.4	69	95.3	70.1	65	70.4	75.1	42.1	60.6	44.8	66.9	70.1	56.2	68.2	58.3	4	4	4	4	4	4	4	4	3.07059	High	-0.311384	5.957e-05	0.0003812	26.78	0.936268
[K].KNSDNLNTPYTDISYNTNDQK.[K]	3xTMT6plex [N-Term; K1; K21]; 1xPhospho [S3(99.1)]	PBANKA_102730 1xPhospho [S649(99.1)]	1	3	PBANKA_102730	conserved Plasmodium protein, unknown function	PBANKA_102730 [647-667]	1	3212.57	S3(Phospho): 96.73	96.4	116.9	92.2	134.4	95.6	87.1	84	93.5	57.5	69.7	55	80.2	57	51.9	50.1	55.8	31.4	42.5	35.7	56.3	57	44.9	48.5	43.3	2	2	2	2	2	2	2	2	2.71381	High	-4.37722	0.006621	0.05804	26.63	-4.46803
[K].NINTSQSYLK.[D]	2xTMT6plex [N-Term; K10]; 1xPhospho [S7(77.8)]	PBANKA_142390 1xPhospho [S93(77.8)]	1	2	PBANKA_142390	translation initiation factor SUI1, putative	PBANKA_142390 [87-96]	0	1705.89	S7(Phospho): 77.82	77.8	102.2	94.3	126.8	97.6	102.7	105.1	93.4	28.2	37.1	34.2	46	35.4	37.2	38.1	33.9	15.4	22.6	22.2	32.3	35.4	32.2	36.9	26.3	1	1	1	1	1	1	1	1	1.8117	High	1.43282	0.00228	0.01795	25.66	1.43282
[K].EINNENNNK.[K]	2xTMT6plex [N-Term; K9]; 2xDeamidated [N6; N7]		1	1	PBANKA_114280	conserved Plasmodium protein, unknown function	PBANKA_114280 [5-13]	0	1548.79		93.2	118.2	84.6	118.4	126.5	79.2	104.6	75.3	18.5	23.5	16.8	23.5	25.1	15.7	20.8	14.9	10.1	14.3	10.9	16.5	25.1	13.6	20.1	11.6	1	1	1	1	1	1	1	1	1.86522	Medium	12.9094	0.0119	0.1155	32.53	12.9094
[K].DIIQNNVSDTELNDSK.[C]	2xTMT6plex [N-Term; K16]; 1xPhospho [S/T]		1	8	PBANKA_144500	subpellicular microtubule protein 2, putative (SPM2)	PBANKA_144500 [103-118]	0	2343.15	S8(Phospho): 49.47; T10(Phospho): 49.47	65.4	109.4	95.5	104.5	92.6	122.3	96.7	113.6	19.4	32.5	28.3	31	27.5	36.3	28.7	33.7	10.6	19.8	18.4	21.8	27.5	31.4	27.8	26.2	2	2	2	2	2	2	2	2	2.24256	High	1.16534	0	0.0001136	45.7	1.16534
[K].NTDTLSTASTGIIEYGSSSK.[T]	2xTMT6plex [N-Term; K20]; 1xPhospho [T/S/Y]; 1xDeamidated [N1]		1	10	PBANKA_071650	RNA-binding protein, putative	PBANKA_071650 [93-112]	0	2571.25		119.4	158.6	101.6	135.6	71.8	53.4	83.2	76.4	16.3	21.7	13.9	18.5	9.8	7.3	11.4	10.4	8.9	13.2	9	13	9.8	6.3	11	8.1	1	1	1	1	1	1	1	1	2.73108	High	7.83438	5.957e-05	0.0003596	24.19	7.83438
[K].ISSSSPDIHNEDIQDENQPLYESHYSNNEGETVNFEK.[D]	2xTMT6plex [N-Term; K37]; 1xDeamidated [N/Q]; 1xPhospho [S/Y/T]		1	76	PBANKA_100200	conserved Plasmodium protein, unknown function	PBANKA_100200 [35-71]	0	4805.14	Y21(Phospho): 62.75	80.2	66.9	53.5	109.6	143.4	136.2	116.9	93.3	5.3	4.4	3.5	7.3	9.5	9	7.7	6.2	2.9	2.7	2.3	5.1	9.5	7.8	7.5	4.8	1	1	1	1	1	1	1	1	4.62255	High	5.42607	0	4.412e-07	45.72	3.07899
[R].NDNNIDSDDERDVTNSDEIGDITNSNIEEK.[Y]	2xTMT6plex [N-Term; K30]; 2xPhospho [S/T]; 3xDeamidated [N3; N4; N15]	PBANKA_092540 2xPhospho [T4737; S]	1	2	PBANKA_092540	dynein heavy chain, putative	PBANKA_092540 [4724-4753]	1	4001.66		65.2	78.6	50.6	76	132.7	137.7	98.9	160.3	4.8	5.7	3.7	5.6	9.7	10.1	7.2	11.7	2.6	3.5	2.4	3.9	9.7	8.7	7	9.1	1	1	1	1	1	1	1	1						25.96	7.19634
[K].RNSDESPISNNSNYNHK.[I]	2xTMT6plex [N-Term; K17]; 2xPhospho [S3(100); S6(100)]	PBANKA_100950 2xPhospho [S2807(100); S2810(100)]	1	3	PBANKA_100950	NAD(P)H-dependent glutamate synthase, putative	PBANKA_100950 [2805-2821]	1	2594.14	S3(Phospho): 100; S6(Phospho): 100	81	80.6	86.2	141.8	109	102.1	110.1	89.3	42.9	42.6	45.6	75	57.7	54	58.2	47.3	23.4	26	29.6	52.7	57.7	46.7	56.4	36.7	2	2	2	2	2	2	2	2	5.65477	High	0.338657	0	1.795e-07	29.81	0.338657
[K].ENNSGGNNNELK.[S]	2xTMT6plex [N-Term; K12]		1	4	PBANKA_122380	vacuolar proton translocating ATPase subunit A, putative	PBANKA_122380 [249-260]	0	1747.9		80	105	96.7	129.7	91.7	117.4	109.8	69.7	72.7	95.5	87.9	117.9	83.4	106.7	99.9	63.3	39.7	58.2	57.1	82.8	83.4	92.3	96.7	49.2	2	2	2	2	2	2	2	2	3.61554	High	1.03856	0	2.756e-05	47.51	-0.00901092
[K].EDDNNNTDIK.[Y]	2xTMT6plex [N-Term; K10]		1	3	PBANKA_110510	DNA mismatch repair protein MSH6, putative (MSH6)	PBANKA_110510 [192-201]	0	1635.82		81.7	97.8	82.9	120.8	98.7	105.3	109	103.8	35.3	42.3	35.9	52.3	42.7	45.6	47.2	44.9	19.3	25.8	23.3	36.7	42.7	39.4	45.7	34.9	1	1	1	1	1	1	1	1	2.52946	High	0.143349	5.957e-05	0.0003242	34.73	0.143349
[K].DNNANQSYSFNNNDDNANQNSSFNK.[K]	2xTMT6plex [N-Term; K25]; 1xDeamidated [N/Q]		1	30	PBANKA_071970	conserved Plasmodium protein, unknown function	PBANKA_071970 [411-435]	0	3295.45		80.8	93.9	83.8	124.9	120.1	103.1	111.4	82.1	17.2	20	17.9	26.6	25.6	22	23.7	17.5	9.4	12.2	11.6	18.7	25.6	19	23	13.6	1	1	1	1	1	1	1	1	3.86129	High	5.53409	0	2.255e-06	49.5	2.10362
[K].ELDSLITNGSEIGNNSGR.[S]	1xTMT6plex [N-Term]; 1xPhospho [S16(78.1)]; 2xDeamidated [N]	PBANKA_121950 1xPhospho [S31(85.6)]	1	8	PBANKA_121950	chloroquine resistance transporter, putative (CRT)	PBANKA_121950 [22-39]	0	2187		98.2	79.6	51.1	116.3	84.3	88.6	176.7	105.2	3.8	3.1	2	4.6	3.3	3.5	6.9	4.1	2.1	1.9	1.3	3.2	3.3	3	6.7	3.2	1	1	1	1	1	1	1	1	2.45996	High	2.28454	0.0001929	0.001023	29.09	2.28454
[K].LVNSDDEEYDENLNMKK.[N]	3xTMT6plex [N-Term; K16; K17]; 1xPhospho [S4(100)]; 1xDeamidated [N14]; 1xOxidation [M15]	PBANKA_140700 1xPhospho [S251(100)]	1	2	PBANKA_140700	conserved Plasmodium protein, unknown function	PBANKA_140700 [248-264]	1	2840.35		84.8	109	71.4	97.9	90.8	109.3	100	136.8	18.1	23.3	15.2	20.9	19.4	23.4	21.4	29.2	9.9	14.2	9.9	14.7	19.4	20.2	20.7	22.7	1	1	1	1	1	1	1	1	2.75533	High	2.96009	0.0009311	0.006997	25.72	2.96009
[K].YYSETPNEEGYNVEHNEMTSNNNNNK.[C]	2xTMT6plex [N-Term; K26]; 1xPhospho [Y/T/S]; 1xDeamidated [N]; 1xOxidation [M18]		1	4	PBANKA_146310	conserved Plasmodium protein, unknown function	PBANKA_146310 [333-358]	0	3646.53	Y11(Phospho): 41.71	79.3	75.8	80	135.6	115.5	151.9	96.9	65	5.5	5.2	5.5	9.4	8	10.5	6.7	4.5	3	3.2	3.6	6.6	8	9.1	6.5	3.5	1	1	1	1	1	1	1	1	1.51941	High	-0.499954	0.003653	0.02919	20.84	-0.499954
[K].LELNPEGNAENNQTNENQDTNNEESEIKYEITR.[H]	2xTMT6plex [N-Term; K28]; 1xPhospho [S/T/Y]; 2xDeamidated [N/Q]	PBANKA_111860 1xPhospho [T746]	1	7	PBANKA_111860	cell division cycle protein 48 homologue, putative	PBANKA_111860 [715-747]	1	4389.99			78.3	65.8	96.6	195.9	197.5	101.2	64.7		3.1	2.6	3.8	7.8	7.9	4	2.6		1.9	1.7	2.7	7.8	6.8	3.9	2		1	1	1	1	1	1	1	1.69849	Medium	3.23281	0.012	0.1174	16.91	3.23281
[K].YNHSNNNNINNNK.[I]	2xTMT6plex [N-Term; K13]; 1xPhospho [S4(86)]	PBANKA_142460 1xPhospho [S307(86)]	1	1	PBANKA_142460	conserved Plasmodium protein, unknown function	PBANKA_142460 [304-316]	0	2097.99	S4(Phospho): 85.98	74.8	107.9	82.5	101.2	103.4	99.4	113.9	116.8	14.1	20.3	15.6	19.1	19.5	18.7	21.5	22	7.7	12.4	10.1	13.4	19.5	16.2	20.8	17.1	1	1	1	1	1	1	1	1	1.51953	High	1.9967	0.008499	0.07388
[K].MNSNAYEENDSFVGEHNNK.[N]	2xTMT6plex [N-Term; K19]; 1xOxidation [M1]; 1xPhospho [S3(100)]	PBANKA_060560 1xPhospho [S1878(100)]	1	23	PBANKA_060560	conserved Plasmodium protein, unknown function	PBANKA_060560 [1876-1894]	0	2753.19	S3(Phospho): 100	101.6	126.7	94.7	133.6	93	86.4	80.1	84	319.2	398.1	297.4	419.8	292.1	271.4	251.5	264	174.3	242.7	193.1	294.8	292.1	234.7	243.6	205	8	8	8	8	8	8	8	8	5.13223	High	1.98324	0	3.055e-05	40.1	0.303293
[R].GSITNTPINQK.[S]	2xTMT6plex [N-Term; K11]; 1xPhospho [S2(99.9)]	PBANKA_083620 1xPhospho [S222(99.9)]	1	2	PBANKA_083620	conserved Plasmodium protein, unknown function	PBANKA_083620 [221-231]	0	1710.92		83.4	103.2	85.9	122	100.4	112	107.9	85.1	18.7	23.1	19.3	27.3	22.5	25.1	24.2	19.1	10.2	14.1	12.5	19.2	22.5	21.7	23.4	14.8	1	1	1	1	1	1	1	1	3.06622	High	1.59982	0.0004851	0.002244	27.72	1.59982
[K].LENEYQNSMSK.[E]	2xTMT6plex [N-Term; K11]; 1xOxidation [M9]; 1xPhospho [S10(82.1)]	PBANKA_143140 1xPhospho [S52(92.4)]	1	2	PBANKA_143140	conserved Plasmodium protein, unknown function	PBANKA_143140 [43-53]	0	1896.88	S10(Phospho): 92.43	86.8	96.4	92.3	141	114.2	90.4	110.1	68.9	22.9	25.4	24.3	37.2	30.1	23.8	29	18.2	12.5	15.5	15.8	26.1	30.1	20.6	28.1	14.1	1	1	1	1	1	1	1	1	2.85446	High	1.43566	0.0002967	0.001285	38.9	1.43566
[R].TDSVMNIEK.[L]	2xTMT6plex [N-Term; K9]; 1xOxidation [M5]; 1xPhospho [S3(98.8)]	PBANKA_100340 1xPhospho [S2039(99.9)]	1	5	PBANKA_100340	lysine decarboxylase, putative (UIS14)	PBANKA_100340 [2037-2045]	0	1590.79	S3(Phospho): 99.43	89.3	127.1	100.5	124.8	93.8	98.8	85.8	79.9	123.1	175	138.5	171.9	129.2	136.1	118.2	110.1	67.2	106.7	89.9	120.7	129.2	117.7	114.5	85.5	2	2	2	2	2	2	2	2	2.97188	High	-2.71054	0.0004268	0.001856	32.45	-0.361647
[K].ILDSDENK.[T]	2xTMT6plex [N-Term; K8]; 1xPhospho [S4(100)]	PBANKA_123430 1xPhospho [S1279(100)]	1	1	PBANKA_123430	carbon catabolite repressor protein 4, putative (CCR4)	PBANKA_123430 [1276-1283]	0	1471.74	S4(Phospho): 100	102.9	117.5	85.4	132.2	87.2	97.9	110.7	66.1	112.5	128.4	93.3	144.5	95.3	107	121	72.2	61.4	78.3	60.6	101.5	95.3	92.5	117.2	56.1	1	1	1	1	1	1	1	1	3.07002	High	0.160908	0.001584	0.01247
[R].NIDNDDSNNSSSNYNNNSTK.[N]	2xTMT6plex [N-Term; K20]; 2xPhospho [S/T/Y]		1	11	PBANKA_140190	conserved Plasmodium protein, unknown function	PBANKA_140190 [133-152]	0	2835.15		91.6	129	82	100.7	105.6	116.6	76.3	98.2	11.5	16.2	10.3	12.7	13.3	14.7	9.6	12.4	6.3	9.9	6.7	8.9	13.3	12.7	9.3	9.6	1	1	1	1	1	1	1	1	1.89549	High	3.70292	0.0001087	0.0005822	25.93	3.70292
[K].SNTYMYDINNNSASGMK.[N]	2xTMT6plex [N-Term; K17]; 1xPhospho [T3(86.9)]; 2xOxidation [M5; M16]	PBANKA_134320 1xPhospho [S1887(99.6)]	1	6	PBANKA_134320	conserved Plasmodium protein, unknown function	PBANKA_134320 [1876-1892]	0	2480.09		101.5	108	89	144.5	88.2	86.7	89.1	93.1	172.9	183.9	151.6	246.2	150.2	147.7	151.8	158.5	94.4	112.1	98.4	172.9	150.2	127.7	147	123.1	3	3	3	3	3	3	3	3	3.99433	High	1.34746	0	5.02e-06	56.96	1.34746
[K].HVGTDTFDINNETTIMMEENENSENYIK.[S]	2xTMT6plex [N-Term; K28]; 1xPhospho [T/Y/S]; 1xDeamidated [N]; 2xOxidation [M16; M17]	PBANKA_060630 1xPhospho [S513(97.5)]	1	9	PBANKA_060630	conserved Plasmodium protein, unknown function	PBANKA_060630 [491-518]	0	3859.7		35.3	90.4	103.3	93.6	87.7	102.9	144.7	142	5.3	13.6	15.6	14.1	13.2	15.5	21.8	21.4	2.9	8.3	10.1	9.9	13.2	13.4	21.1	16.6	1	2	2	2	2	2	2	2	3.35044	High	6.30161	0	0.0001232	37.17	6.30161
[K].DDESIKDQESVDEKR.[E]	3xTMT6plex [N-Term; K6; K14]; 2xPhospho [S4(100); S10]	PBANKA_113820 2xPhospho [S458(100); S464(100)]	1	5	PBANKA_113820	RuvB-like helicase 3, putative (RUVB3)	PBANKA_113820 [455-469]	2	2640.24		83.1	95.1	96.5	143	101	102.6	113	65.6	186.6	213.4	216.6	320.9	226.8	230.3	253.7	147.3	101.9	130.1	140.6	225.4	226.8	199.2	245.7	114.4	4	4	4	4	4	4	4	4	3.41414	High	2.26625	0.0003306	0.001479	27.45	2.26625
[K].DSENDPKEEK.[N]	3xTMT6plex [N-Term; K7; K10]; 1xPhospho [S2(100)]	PBANKA_101670 1xPhospho [S247(100)]	1	1	PBANKA_101670	conserved Plasmodium protein, unknown function	PBANKA_101670 [246-255]	1	1957.97	S2(Phospho): 100	82.1	95.5	94.1	138.1	97.3	106.2	116.2	70.6	92.7	107.8	106.3	155.9	109.8	119.9	131.1	79.7	50.6	65.7	69	109.5	109.8	103.7	127	61.9	1	1	1	1	1	1	1	1	2.63036	High	-0.132624	0.005673	0.04995	8.4	-0.132624
[R].SEEFSNLDGYKVSSDEK.[T]	3xTMT6plex [N-Term; K11; K17]; 2xPhospho [S5(99.8); S/Y]	PBANKA_140500 2xPhospho [S417(99.8); S/Y]	1	7	PBANKA_140500	conserved Plasmodium protein, unknown function	PBANKA_140500 [413-429]	1	2781.29	S13(Phospho): 81.78; S14(Phospho): 81.78	75.1	88	86.5	126.1	112.4	117.5	116.2	78.2	41	48.1	47.3	68.9	61.4	64.2	63.5	42.7	22.4	29.3	30.7	48.4	61.4	55.5	61.5	33.2	3	3	3	3	3	3	3	3	2.75052	High	0.835202	0.0006943	0.00352	23.9	1.36188
[K].GKDEVSEEEDDEENDEEESNEHNK.[N]	3xTMT6plex [N-Term; K2; K24]; 2xPhospho [S6(100); S19(100)]	PBANKA_080230 2xPhospho [S192(100); S205(100)]	1	13	PBANKA_080230	E3 ubiquitin-protein ligase, putative	PBANKA_080230 [187-210]	1	3682.5	S6(Phospho): 100; S19(Phospho): 100	88.4	101.9	97.2	143.9	102.7	102.7	107.1	56	238.3	274.9	262.2	388.2	277.1	277.1	288.8	151	130.1	167.6	170.2	272.6	277.1	239.6	279.7	117.3	6	6	6	6	6	6	6	6	5.02398	High	0.193998	5.957e-05	0.0004089	66.37	0.247373
[K].INYNDENTMVYNTNEQEENENKSLSNNNR.[M]	2xTMT6plex [N-Term; K22]; 2xDeamidated [N/Q]; 1xOxidation [M9]; 1xPhospho [S/T/Y]		1	21	PBANKA_140670	carbamoyl phosphate synthetase, putative	PBANKA_140670 [1472-1500]	1	4046.76	T8(Phospho): 28.39; T13(Phospho): 28.39; S25(Phospho): 28.39	46.3	99.1	115.4	114.7	99.7	106.1	119.9	98.9	9.9	21.2	24.6	24.5	21.3	22.7	25.6	21.1	5.4	12.9	16	17.2	21.3	19.6	24.8	16.4	2	2	2	2	2	2	2	2	2.67345	High	-0.30284	0	0.0001164	31.73	5.91114
[K].NDDSINITNGEINVK.[R]	2xTMT6plex [N-Term; K15]; 1xDeamidated [N]; 1xPhospho [T8(85.8)]	PBANKA_121300 1xPhospho [T2237(85.8)]	1	3	PBANKA_121300	transcriptional coactivator ADA2, putative (ADA2)	PBANKA_121300 [2230-2244]	0	2185.08	T8(Phospho): 85.77	58.2	125.5	119.6	108.9	113	123.9	94.8	56.1	4.9	10.7	10.2	9.3	9.6	10.5	8.1	4.8	2.7	6.5	6.6	6.5	9.6	9.1	7.8	3.7	1	1	1	1	1	1	1	1	2.29666	High	-5.68278	0.000861	0.005946	30.38	-5.68278
[K].NSTQIENIENTQLLYNDGNNSDAMSATK.[C]	2xTMT6plex [N-Term; K28]; 1xOxidation [M24]; 1xPhospho [Y/S/T]		1	9	PBANKA_141570	transcription factor with AP2 domain(s), putative (ApiAP2)	PBANKA_141570 [840-867]	0	3639.69	T11(Phospho): 32.89; Y15(Phospho): 32.89; S21(Phospho): 32.89	80.8	60.7	52.6	116.5	115.3	154.7	102.1	117.3	11.4	8.5	7.4	16.4	16.2	21.7	14.4	16.5	6.2	5.2	4.8	11.5	16.2	18.8	13.9	12.8	2	2	2	2	2	2	2	2	3.49817	High	1.61913	0	4.412e-07	54.32	1.61913
[K].NYNSLKDTK.[R]	3xTMT6plex [N-Term; K6; K9]; 1xDeamidated [N3]; 1xPhospho [S/T/Y]		1	1	PBANKA_060560	conserved Plasmodium protein, unknown function	PBANKA_060560 [1961-1969]	1	1850.99	S4(Phospho): 49.35; T8(Phospho): 49.35	135.4	188.4	134	168.1	48.3	44.9	37.5	43.4	76.7	106.8	75.9	95.3	27.4	25.4	21.3	24.6	41.9	65.1	49.3	66.9	27.4	22	20.6	19.1	1	1	1	1	1	1	1	1	1.59192	High	-0.00949038	0.009558	0.08429
[K].EYEEILDTASENEVEEKNEDTTNLVFSEEK.[Y]	3xTMT6plex [N-Term; K17; K30]; 1xPhospho [S/T/Y]		1	8	PBANKA_135640	DNA repair protein RAD5, putative (RAD5)	PBANKA_135640 [404-433]	1	4301.04		46.2	105.7	101.3	89.9	113	112.2	111.8	119.8	7	15.9	15.2	13.5	17	16.9	16.8	18	3.8	9.7	9.9	9.5	17	14.6	16.3	14	1	1	1	1	1	1	1	1	3.32852	High	1.09241	0	9.315e-06	39.79	1.09241
[K].DVGISNNNDNIELNEGNQDSHSNIDDIK.[D]	2xTMT6plex [N-Term; K28]; 1xPhospho [S]		1	8	PBANKA_143240	perforin-like protein 2 (PLP2)	PBANKA_143240 [404-431]	0	3621.67	S20(Phospho): 44; S22(Phospho): 44	87.7	120.4	104	134	86.7	88.5	74.7	104.1	16.5	22.6	19.6	25.2	16.3	16.7	14	19.6	9	13.8	12.7	17.7	16.3	14.4	13.6	15.2	2	2	2	2	2	2	2	2	2.23545	High	0.855923	0	3.405e-05	36.23	0.855923
[R].NMYSQDINESNNSNNPTSGNQHDDQTIFDQR.[N]	1xTMT6plex [N-Term]; 1xOxidation [M2]		1	2	PBANKA_114480	conserved Plasmodium protein, unknown function	PBANKA_114480 [313-343]	0	3828.66		66.3	95.4	52.4	60.9	126.1	114.1	156.3	128.5	6	8.7	4.8	5.6	11.5	10.4	14.2	11.7	3.3	5.3	3.1	3.9	11.5	9	13.8	9.1	1	1	1	1	1	1	1	1	2.61257	High	-1.5678	0	7.036e-05	60.35	-1.5678
[R].ELNNADNVNNNSVNKTSDNYLSNLHGK.[G]	3xTMT6plex [N-Term; K15; K27]; 2xPhospho [Y/S/T]	PBANKA_135870 2xPhospho [S59(88.8); T/S/Y]	1	20	PBANKA_135870	conserved Plasmodium protein, unknown function	PBANKA_135870 [38-64]	1	3835.83		66.5	129.1	94.7	83.9	98.5	106	106.9	114.3	18.5	35.9	26.3	23.4	27.4	29.5	29.7	31.8	10.1	21.9	17.1	16.4	27.4	25.5	28.8	24.7	2	2	2	2	2	2	2	2	3.23471	High	-4.28238	0	2.444e-05	56.64	-4.28238
[K].HSESSEVDDNNNNNHNGK.[D]	2xTMT6plex [N-Term; K18]; 2xDeamidated [N]		1	66	PBANKA_112010	conserved Plasmodium protein, unknown function	PBANKA_112010 [1011-1028]	0	2471.11		49.9	92.5	119.6	132	105.2	107.2	126.1	67.4	15.9	29.5	38.2	42.1	33.6	34.2	40.3	21.5	8.7	18	24.8	29.6	33.6	29.6	39	16.7	3	4	4	4	4	4	4	4	4.63189	High	2.05601	3.638e-05	0.0001539	45.51	0.672842
[K].LQSMNVENTR.[E]	1xTMT6plex [N-Term]; 1xPhospho [S3(100)]; 1xOxidation [M4]	PBANKA_100580 1xPhospho [S16(100)]	1	9	PBANKA_100580	conserved Plasmodium protein, unknown function	PBANKA_100580 [14-23]	0	1516.7		123.7	152.4	117.7	167	63.2	59	53.3	63.6	288.5	355.5	274.6	389.6	147.4	137.7	124.3	148.3	157.5	216.7	178.3	273.6	147.4	119.1	120.4	115.2	6	6	6	6	6	6	6	6	2.75346	High	-0.523898	0.0004851	0.002316	34.84	0.985177
[K].NDNKDNNNDDDENK.[G]	3xTMT6plex [N-Term; K4; K14]; 1xDeamidated [N6]		1	2	PBANKA_102550	NOT family protein, putative	PBANKA_102550 [477-490]	1	2352.12		72.8	105.8	99.3	121.9	102.2	106.9	110.6	80.4	17.9	26.1	24.5	30	25.2	26.4	27.3	19.8	9.8	15.9	15.9	21.1	25.2	22.8	26.4	15.4	1	1	1	1	1	1	1	1	1.57293	High	-0.129587	0.002364	0.01911	14.12	-0.129587
[K].MTENTNNKNNSANNSPQESK.[E]	3xTMT6plex [N-Term; K8; K20]; 2xPhospho [T/S]; 1xDeamidated [N]; 1xOxidation [M1]	PBANKA_142420 2xPhospho [S251(99.7); T/S]	1	11	PBANKA_142420	conserved Plasmodium protein, unknown function	PBANKA_142420 [237-256]	1	3086.37		89.5	89.3	69.6	121.6	103.3	113.7	98.4	114.7	14.5	14.4	11.2	19.6	16.7	18.4	15.9	18.5	7.9	8.8	7.3	13.8	16.7	15.9	15.4	14.4	1	1	1	1	1	1	1	1	2.06405	High	0.854213	0.004156	0.03522	26.34	0.854213
[K].SLNSVHAYDNINK.[N]	2xTMT6plex [N-Term; K13]; 2xPhospho [S1(100); S4(100)]	PBANKA_145250 2xPhospho [S316(100); S319(100)]	1	2	PBANKA_145250	conserved Plasmodium protein, unknown function	PBANKA_145250 [316-328]	0	2092.99	S1(Phospho): 100; S4(Phospho): 100	70.4	112.8	91.1	100.8	98.6	117	110.2	99	13.9	22.3	18	19.9	19.5	23.1	21.8	19.6	7.6	13.6	11.7	14	19.5	20	21.1	15.2	1	1	1	1	1	1	1	1	3.07336	High	2.37445	0.0001087	0.0004934	22.86	2.37445
[K].SKNENEDEEDVDEEEDEESGDDEYNNYSEK.[N]	3xTMT6plex [N-Term; K2; K30]; 1xPhospho [Y/S]; 1xDeamidated [N]	PBANKA_112350 1xPhospho [S892(86.6)]	1	27	PBANKA_112350	SNF2 helicase, putative (ISWI)	PBANKA_112350 [874-903]	1	4352.76		70.1	104.4	74.6	87	115.9	111.8	116.8	119.3	33.2	49.4	35.3	41.2	54.8	52.8	55.2	56.4	18.1	30.1	22.9	28.9	54.8	45.7	53.5	43.8	4	4	4	4	4	4	4	4	3.63979	High	0.998832	0	2.185e-06	59.79	0.550122
[R].VDEDGQFQNDHIPSDNDEDMHTNIYDSNK.[F]	2xTMT6plex [N-Term; K29]; 2xDeamidated [N/Q]; 1xOxidation [M20]; 1xPhospho [S14(98.6)]	PBANKA_145370 1xPhospho [S404(98.6)]	1	5	PBANKA_145370	transcription factor with AP2 domain(s), putative (ApiAP2)	PBANKA_145370 [391-419]	0	3948.64	S14(Phospho): 98.6	121.7	146.7	86.6	129.8	91.1	87.6	59.8	76.8	14.3	17.2	10.2	15.2	10.7	10.3	7	9	7.8	10.5	6.6	10.7	10.7	8.9	6.8	7	1	1	1	1	1	1	1	1	2.71385	High	8.85598	0.0003306	0.001551	34.91	8.85598
[K].SQSSYNDSDDDKNFK.[G]	3xTMT6plex [N-Term; K12; K15]; 2xPhospho [S3(75.6); S8(98.4)]	PBANKA_131440 2xPhospho [S408(75.6); S413(98.4)]	1	2	PBANKA_131440	conserved Plasmodium protein, unknown function	PBANKA_131440 [406-420]	1	2597.14	S3(Phospho): 75.61; S8(Phospho): 98.37	96.8	100.6	87.9	143.6	95.4	73.7	109.7	92.3	15.9	16.6	14.5	23.6	15.7	12.1	18.1	15.2	8.7	10.1	9.4	16.6	15.7	10.5	17.5	11.8	1	1	1	1	1	1	1	1	2.50358	High	1.30492	0.0008111	0.005061	23.21	1.30492
[K].QYHSPNENDNTHQDSTTDDEER.[K]	1xTMT6plex [N-Term]; 4xPhospho [S4; T17; S/T]	PBANKA_061370 4xPhospho [S11; T24; S/T]	1	5	PBANKA_061370	RNA-binding protein, putative	PBANKA_061370 [8-29]	0	3181.07		75.6	87.5	77.5	114.6	94.6	124.5	98.7	127	7.5	8.7	7.7	11.4	9.4	12.4	9.8	12.6	4.1	5.3	5	8	9.4	10.7	9.5	9.8	2	2	2	2	2	2	2	2						29.78	-1.73584
[K].QDNLMGSQLNK.[S]	2xTMT6plex [N-Term; K11]; 1xOxidation [M5]; 1xPhospho [S7(100)]	PBANKA_020270 1xPhospho [S402(100)]	1	2	PBANKA_020270	kinesin-8, putative	PBANKA_020270 [396-406]	0	1801.89	S7(Phospho): 100	110.4	122.2	87.1	139.2	95.9	95.7	74.2	75.2	29.5	32.6	23.3	37.2	25.6	25.6	19.8	20.1	16.1	19.9	15.1	26.1	25.6	22.1	19.2	15.6	1	1	1	1	1	1	1	1	2.75346	High	-4.96232	0.000822	0.005215	39.87	-4.96232
[K].ALSGIENEESEIDGEK.[T]	2xTMT6plex [N-Term; K16]; 1xPhospho [S]	PBANKA_143840 1xPhospho [S3932(100)]	1	2	PBANKA_143840	conserved Plasmodium protein, unknown function	PBANKA_143840 [3923-3938]	0	2258.08		73.8	126.4	122.3	131.6	138.7	50.7	126	30.5	6.2	10.7	10.3	11.1	11.7	4.3	10.6	2.6	3.4	6.5	6.7	7.8	11.7	3.7	10.3	2	1	1	1	1	1	1	1	1	1.81123	High	6.38623	0.00179	0.01393	21.94	6.38623
[K].QQTGSNNVGTGNNNSNNHTNK.[N]	2xTMT6plex [N-Term; K21]		1	12	PBANKA_061320	DNA polymerase alpha, putative	PBANKA_061320 [778-798]	0	2658.3		69.4	87.4	80	110	88.9	105.6	111.4	147.3	37	46.6	42.7	58.7	47.4	56.3	59.4	78.5	20.2	28.4	27.7	41.2	47.4	48.7	57.5	61	3	3	4	4	4	4	4	4	4.54836	High	0.988988	0	4.391e-08	66.97	1.52213
[K].NDSYNDENINIQR.[E]	1xTMT6plex [N-Term]; 1xPhospho [S3(90.8)]	PBANKA_083120 1xPhospho [S1118(90.8)]	1	3	PBANKA_083120	diacylglycerol kinase, putative	PBANKA_083120 [1116-1128]	0	1903.84		68.5	96.1	75.9	94.7	132.7	104.8	98.7	128.6	20.7	29	22.9	28.6	40.1	31.7	29.8	38.9	11.3	17.7	14.9	20.1	40.1	27.4	28.9	30.2	1	1	1	1	1	1	1	1	2.86855	High	-0.348298	0.0003692	0.001723	21.71	-0.348298
[R].FHQELSDITVTEEEENEEYKK.[A]	3xTMT6plex [N-Term; K20; K21]; 2xPhospho [S6(99.4); T9(94.1)]	PBANKA_135830 2xPhospho [S1339(100); T1342(98.9)]	1	2	PBANKA_135830	conserved Plasmodium protein, unknown function	PBANKA_135830 [1334-1354]	1	3444.61	S6(Phospho): 100; T9(Phospho): 98.9	77.4	108.5	81.1	100.5	81.4	123.3	109.1	118.7	17.2	24.1	18	22.4	18.1	27.4	24.3	26.4	9.4	14.7	11.7	15.7	18.1	23.7	23.5	20.5	1	1	1	1	1	1	1	1	4.62375	High	1.15992	0	1.669e-06	37.1	1.15992
[K].KTDEPSHDEQIDSETANNPIDINPVK.[D]	3xTMT6plex [N-Term; K1; K26]; 1xPhospho [T15(80.8)]	PBANKA_041130 1xPhospho [T549(80.8)]	1	4	PBANKA_041130	conserved Plasmodium protein, unknown function	PBANKA_041130 [535-560]	1	3673.82	T15(Phospho): 80.8	92.5	132.5	123.8	153.5	80	74.7	71.3	71.8	22.9	32.8	30.7	38	19.8	18.5	17.7	17.8	12.5	20	19.9	26.7	19.8	16	17.1	13.8	1	1	1	1	1	1	1	1	2.44651	High	-3.03775	0.0004607	0.001977	23.15	-3.03775
[K].QSNSISPIK.[E]	2xTMT6plex [N-Term; K9]; 1xPhospho [S]; 1xDeamidated [N3]		1	3	PBANKA_062130	conserved Plasmodium protein, unknown function	PBANKA_062130 [301-309]	0	1512.81		92.5	153.2	105	107.9	91.8	90.6	69.5	89.5	46.2	76.4	52.4	53.8	45.8	45.2	34.7	44.7	25.2	46.6	34	37.8	45.8	39.1	33.6	34.7	1	1	1	1	1	1	1	1	1.92721	High	2.12832	0.003979	0.03345	17.74	2.12832
[K].QADEDFDTDYVK.[R]	2xTMT6plex [N-Term; K12]; 1xPhospho [T8(99.9)]	PBANKA_103220 1xPhospho [T2933(99.9)]	1	2	PBANKA_103220	conserved Plasmodium protein, unknown function	PBANKA_103220 [2926-2937]	0	1983.9		84.5	103	92.6	131.4	91.2	91.8	96.4	109.1	15.8	19.2	17.3	24.5	17	17.1	18	20.3	8.6	11.7	11.2	17.2	17	14.8	17.4	15.8	1	1	1	1	1	1	1	1	2.13477	High	0.0660763	0.0001087	0.000606	36.93	0.0660763
[K].EELNSDTYDKK.[K]	3xTMT6plex [N-Term; K10; K11]; 1xPhospho [S5(100)]	PBANKA_142220 1xPhospho [S272(100)]	1	2	PBANKA_142220	zinc transporter, putative	PBANKA_142220 [268-278]	1	2109.07	S5(Phospho): 99.97	85.4	98.1	101.7	148.7	99	106.2	99.8	61	77.1	88.6	91.8	134.3	89.4	95.9	90.1	55.1	42.1	54	59.6	94.3	89.4	82.9	87.3	42.8	1	1	1	1	1	1	1	1	2.09191	High	-0.288482	0.0009311	0.007227	18.79	-0.288482
[K].QEQDALSINK.[D]	2xTMT6plex [N-Term; K10]; 1xPhospho [S7(100)]	PBANKA_061320 1xPhospho [S262(100)]	1	4	PBANKA_061320	DNA polymerase alpha, putative	PBANKA_061320 [256-265]	0	1683.87	S7(Phospho): 100	87.2	102.7	93.2	135.3	102.7	101.4	114.3	63.3	106.4	125.3	113.8	165.2	125.4	123.7	139.5	77.3	58.1	76.4	73.9	116	125.4	107	135.1	60	2	2	2	2	2	2	2	2	4.27156	High	0.499339	0	3.126e-05	36.42	0.499339
[K].ANDPLDYVYFYSSDNEDDAFIAHK.[E]	2xTMT6plex [N-Term; K24]; 1xPhospho [Y/S]; 2xDeamidated [N2; N15]		1	8	PBANKA_145350	phosphohydrolase, putative	PBANKA_145350 [706-729]	0	3349.49		42.7	62.8	71.8	87.7	168.1	138.6	151.2	77.1	2.6	3.8	4.3	5.3	10.1	8.3	9.1	4.6	1.4	2.3	2.8	3.7	10.1	7.2	8.8	3.6	1	1	1	1	1	1	1	1	2.44506	High	8.57796	0.0005936	0.002685	11.95	8.57796
[K].RERSHDSDILEQNR.[Y]	1xTMT6plex [N-Term]; 1xPhospho [S4(99.7)]	PBANKA_031600 1xPhospho [S143(100)]	1	6	PBANKA_031600	replication factor C subunit 1, putative	PBANKA_031600 [140-153]	2	2063.98	S4(Phospho): 92.75	73.2	123.4	65.1	59	82.9	96.6	79	220.9	45.1	75.9	40	36.3	51	59.4	48.6	136	24.6	46.3	26	25.5	51	51.4	47.1	105.6	4	4	4	4	4	4	4	4	3.20854	High	-0.607865	0.0002384	0.001096	27.71	-0.607865
[K].NYFSDDEHSNNAKSDDELK.[H]	3xTMT6plex [N-Term; K13; K19]; 1xDeamidated [N10]; 2xPhospho [S14(98.2); S/Y]	PBANKA_110940 2xPhospho [S885; S895]	1	1	PBANKA_110940	phosphatidylinositol 4-kinase, putative (PI4K)	PBANKA_110940 [882-900]	1	3076.34	Y2(Phospho): 80.48; S14(Phospho): 98.16	89.4	118.7	85.1	111.7	115.8	109.2	123.7	46.4	25.1	33.3	23.9	31.3	32.5	30.6	34.7	13	13.7	20.3	15.5	22	32.5	26.5	33.6	10.1	1	1	1	1	1	1	1	1	2.86784	Medium	4.21202	0.01321	0.1301	20.01	4.21202
[K].SELPNDTDEIK.[R]	2xTMT6plex [N-Term; K11]; 1xPhospho [T/S]	PBANKA_142720 1xPhospho [S29(100)]	1	1	PBANKA_142720	protein phosphatase 2C, putative	PBANKA_142720 [29-39]	0	1798.89		108.7	106.5	90.8	156.2	93.3	90.2	102.9	51.4	29.1	28.5	24.3	41.9	25	24.2	27.6	13.8	15.9	17.4	15.8	29.4	25	20.9	26.7	10.7	1	1	1	1	1	1	1	1	1.92006	High	1.30258	0.006874	0.05948	9.68	1.30258
[K].NNIDNSPSSDIYNNTK.[I]	2xTMT6plex [N-Term; K16]; 1xDeamidated [N]; 2xPhospho [S/Y/T]		1	5	PBANKA_062220	conserved Plasmodium protein, unknown function	PBANKA_062220 [308-323]	0	2415.05	S6(Phospho): 48.76; S8(Phospho): 48.76; S9(Phospho): 48.76; Y12(Phospho): 48.76	94.2	108.2	63.4	100	100.5	114.8	108.1	110.7	15.6	17.9	10.5	16.5	16.6	19	17.9	18.3	8.5	10.9	6.8	11.6	16.6	16.4	17.3	14.2	1	1	1	1	1	1	1	1	1.95606	High	6.11616	0.002056	0.01548	35.1	6.11616
[R].SLSESFNHMDK.[L]	2xTMT6plex [N-Term; K11]; 2xPhospho [S]; 1xOxidation [M9]	PBANKA_130400 2xPhospho [S284(99); S286(99.7)]	1	1	PBANKA_130400	conserved Plasmodium protein, unknown function	PBANKA_130400 [282-292]	0	1928.83		127.5	158.8	129.1	179.7	54.4	62.6	50	37.9	51.1	63.6	51.8	72	21.8	25.1	20	15.2	27.9	38.8	33.6	50.6	21.8	21.7	19.4	11.8	1	1	1	1	1	1	1	1	2.18108	High	0.425096	0.005129	0.04397	24.96	0.425096
[R].SLSPQPQNSQPQNSQTQDSQTQDSQTQQQSQR.[S]	1xTMT6plex [N-Term]; 1xPhospho [S/T]		1	14	PBANKA_030500	serine repeat antigen 2 (SERA2)	PBANKA_030500 [146-177]	0	3923.76		95.7	61.2	64.4	148.8	137.4	55.3	98.7	138.4	6.4	4.1	4.3	10	9.2	3.7	6.6	9.3	3.5	2.5	2.8	7	9.2	3.2	6.4	7.2	1	1	1	1	1	1	1	1	3.40688	High	0.467226	5.957e-05	0.0002251	49.8	0.268435
[K].TANDDDDNDIDLFGDSNNDDK.[S]	2xTMT6plex [N-Term; K21]; 1xPhospho [S16(100)]	PBANKA_081420 1xPhospho [S105(100)]	1	10	PBANKA_081420	elongation factor 1-beta, putative	PBANKA_081420 [90-110]	0	2866.19	S16(Phospho): 100	85.5	101	93.1	134.4	103.2	99.7	116.4	66.7	74	87.4	80.6	116.3	89.3	86.3	100.7	57.7	40.4	53.3	52.3	81.7	89.3	74.6	97.5	44.8	4	4	4	4	4	4	4	4	4.30602	High	-4.15856	0	3.222e-06	74.6	-4.15856
[K].SSEGNGNVQK.[K]	2xTMT6plex [N-Term; K10]; 2xDeamidated [N5; N7]; 1xPhospho [S1(93.8)]	PBANKA_051140 1xPhospho [S203(93.8)]	1	3	PBANKA_051140	peroxiredoxin, putative (nPrx)	PBANKA_051140 [203-212]	0	1559.74	S1(Phospho): 93.76	85.6	103	103.2	145.5	88.4	98.7	88	87.6	73.6	88.6	88.7	125.2	76	84.9	75.7	75.3	40.2	54	57.6	87.9	76	73.4	73.3	58.5	1	1	1	1	1	1	1	1	3.77897	High	12.752	0.0005032	0.002474	33.35	12.752
[R].GRNDDTEEEIIR.[K]	1xTMT6plex [N-Term]; 1xPhospho [T6(100)]	PBANKA_120260 1xPhospho [T806(100)]	1	2	PBANKA_120260	E3 ubiquitin-protein ligase, putative	PBANKA_120260 [801-812]	1	1755.81	T6(Phospho): 100	93	87.2	72.1	130	90.5	77.1	96.7	153.3	11.7	11	9.1	16.4	11.4	9.7	12.2	19.3	6.4	6.7	5.9	11.5	11.4	8.4	11.8	15	1	1	1	1	1	1	1	1	2.23162	High	0.175454	0.000822	0.005389	23.14	0.175454
[K].LFSDDEQDINQNENK.[G]	2xTMT6plex [N-Term; K15]; 1xPhospho [S3(100)]	PBANKA_134340 1xPhospho [S1101(100)]	1	2	PBANKA_134340	conserved Plasmodium protein, unknown function	PBANKA_134340 [1099-1113]	0	2347.09	S3(Phospho): 100	83.1	97.2	81.7	120.1	98.2	115.6	104	100	32.4	37.9	31.9	46.8	38.3	45.1	40.6	39	17.7	23.1	20.7	32.9	38.3	39	39.3	30.3	1	1	1	1	1	1	1	1	3.35339	High	-3.86482	0.0004851	0.002324	17.23	-3.86482
[K].NENEVIKNEEDAVGNDDEVYSNEE.[-]	2xTMT6plex [N-Term; K7]; 1xDeamidated [N]; 1xPhospho [S21(79.7)]	PBANKA_103890 1xPhospho [S1791(82.1)]	1	6	PBANKA_103890	conserved Plasmodium protein, unknown function	PBANKA_103890 [1771-1794]	1	3293.43	S21(Phospho): 82.11	70.6	107.9	105.4	123.9	82.4	113.7	100.2	95.8	10.6	16.2	15.9	18.7	12.4	17.1	15.1	14.4	5.8	9.9	10.3	13.1	12.4	14.8	14.6	11.2	1	1	1	1	1	1	1	1	3.03262	High	6.61338	0.003906	0.03264	36.64	6.61338
[K].DIVSEENEYDLPNINK.[F]	2xTMT6plex [N-Term; K16]; 1xDeamidated [N7]; 1xPhospho [S4(100)]	PBANKA_041680 1xPhospho [S52]	1	1	PBANKA_041680	ubiquitin specific protease, putative	PBANKA_041680 [49-64]	0	2431.17	S4(Phospho): 100	55.4	109.8	110.1	107	116.4	90.1	100.3	110.9	6	12	12	11.7	12.7	9.8	10.9	12.1	3.3	7.3	7.8	8.2	12.7	8.5	10.6	9.4	1	1	1	1	1	1	1	1	3.2867	Low	8.00198	0.6426	1	53.13	8.00198
[K].EYEEILDTASENEVEEKNEDTTNLVFSEEK.[Y]	3xTMT6plex [N-Term; K17; K30]; 2xPhospho [T8(99.1); S10(98.7)]	PBANKA_135640 2xPhospho [T411(99.1); S413(98.7)]	1	7	PBANKA_135640	DNA repair protein RAD5, putative (RAD5)	PBANKA_135640 [404-433]	1	4381	T8(Phospho): 99.09; S10(Phospho): 98.73	60.2	88.6	79.6	97	79.8	105.9	189.1	99.8	2.6	3.8	3.4	4.1	3.4	4.5	8.1	4.2	1.4	2.3	2.2	2.9	3.4	3.9	7.8	3.3	1	1	1	1	1	1	1	1	2.67208	High	-2.27627	5.957e-05	0.0002628	37.1	-2.27627
[K].TEVVNETASDTSNGILDDTKDKDEAQVNEDK.[H]	4xTMT6plex [N-Term; K20; K22; K31]; 2xDeamidated [N/Q]; 2xPhospho [T7(75.2); S/T]	PBANKA_103160 2xPhospho [T280(75.2); S/T]	1	11	PBANKA_103160	ribosome maturation protein SBDS, putative	PBANKA_103160 [274-304]	2	4459.1	T7(Phospho): 75.25; S9(Phospho): 37.09; T11(Phospho): 29.13; S12(Phospho): 29.13; T19(Phospho): 29.13	88.8	113.8	78.4	106.1	109	114.7	119.1	70.1	51.8	66.4	45.7	61.9	63.6	67	69.5	40.9	28.3	40.5	29.7	43.5	63.6	57.9	67.3	31.8	3	3	3	3	3	3	3	3	3.60237	High	6.01419	0	1.521e-05	31.28	9.70989
[K].NISRNEDNTESNK.[E]	2xTMT6plex [N-Term; K13]; 1xPhospho [S3(100)]	PBANKA_080320 1xPhospho [S1772(100)]	1	1	PBANKA_080320	inositol-phosphate phosphatase, putative	PBANKA_080320 [1770-1782]	1	2058.99	S3(Phospho): 99.97	74.2	116.5	98.2	110	87	99.4	105.9	108.8	21.4	33.6	28.3	31.8	25.1	28.7	30.6	31.4	11.7	20.5	18.4	22.3	25.1	24.8	29.6	24.4	1	1	1	1	1	1	1	1	1.72236	High	0.743111	0.008801	0.07643	13.58	0.743111
[K].ELQSVSDNAEFSYIDK.[T]	2xTMT6plex [N-Term; K16]; 1xPhospho [S4(92.7)]	PBANKA_135680 1xPhospho [S473(92.7)]	1	6	PBANKA_135680	conserved Plasmodium protein, unknown function	PBANKA_135680 [470-485]	0	2383.15	S4(Phospho): 92.73	113.5	117.2	55.3	105.1	94	90.4	99.5	125	28.8	29.7	14	26.6	23.8	22.9	25.2	31.7	15.7	18.1	9.1	18.7	23.8	19.8	24.4	24.6	1	1	1	1	1	1	1	1	4.35593	High	0.183044	0	1.217e-05	71.45	0.183044
[K].SIEIGEDYHTINK.[G]	2xTMT6plex [N-Term; K13]; 1xPhospho [S1(100)]	PBANKA_123710 1xPhospho [S1734(100)]	1	2	PBANKA_123710	conserved Plasmodium protein, unknown function	PBANKA_123710 [1734-1746]	0	2057.04		119.6	128.9	92.2	149.8	87.9	76.9	83.3	61.5	39.6	42.6	30.5	49.6	29.1	25.4	27.6	20.3	21.6	26	19.8	34.8	29.1	22	26.7	15.8	1	1	1	1	1	1	1	1	3.43618	High	0.929806	8.7e-05	0.0004649	25.67	0.929806
[R].NDEEYKSER.[S]	2xTMT6plex [N-Term; K6]; 1xPhospho [S/Y]	PBANKA_091750 1xPhospho [S21(95.4)]	1	3	PBANKA_091750	structural maintenance of chromosome protein, putative	PBANKA_091750 [15-23]	1	1707.8	S7(Phospho): 95.44	89	111.5	85.5	118	117.2	92.5	106.7	79.6	43.6	54.6	41.9	57.8	57.4	45.3	52.2	39	23.8	33.3	27.2	40.6	57.4	39.2	50.6	30.3	2	2	2	2	2	2	2	2	1.98406	High	-0.283884	0.004119	0.03399
[R].ENSDDESEEDRKK.[N]	3xTMT6plex [N-Term; K12; K13]; 2xPhospho [S3(100); S7(100)]	PBANKA_114580 2xPhospho [S68(100); S72(100)]	1	1	PBANKA_114580	conserved rodent malaria protein, unknown function	PBANKA_114580 [66-78]	2	2428.09	S3(Phospho): 100; S7(Phospho): 100	106.4	100.8	99	169.1	125.2	89.2	52.2	58.1	95.1	90.1	88.4	151.1	111.8	79.7	46.7	51.9	51.9	54.9	57.4	106.1	111.8	68.9	45.2	40.3	1	1	1	1	1	1	1	1	3.73759	High	1.5894	0.002028	0.01529	16.7	1.5894
[K].EDNASLSK.[Y]	2xTMT6plex [N-Term; K8]; 1xPhospho [S5(100)]	PBANKA_070450 1xPhospho [S6109(100)]	1	2	PBANKA_070450	E3 ubiquitin-protein ligase, putative	PBANKA_070450 [6105-6112]	0	1401.7		93.2	98.8	96.9	151	96.5	99.8	104.5	59.3	131.3	139.1	136.5	212.7	135.9	140.6	147.1	83.6	71.7	84.8	88.6	149.4	135.9	121.6	142.5	64.9	1	1	1	1	1	1	1	1	2.78247	High	0.252228	0.003607	0.0287	27.18	0.252228
[R].NYDDNSEKFHNSDGVNNVEYESNK.[N]	3xTMT6plex [N-Term; K8; K24]; 1xPhospho [S/Y]		1	10	PBANKA_103790	conserved Plasmodium protein, unknown function	PBANKA_103790 [23-46]	1	3585.64		90.8	102.8	89.8	134.4	114.9	113.4	86.8	67.1	129.1	146.2	127.7	191.1	163.4	161.3	123.4	95.4	70.5	89.1	82.9	134.2	163.4	139.5	119.5	74.1	3	3	3	3	3	3	3	3	5.98391	High	0.591692	0	1.628e-06	37.29	0.591692
[K].EHNMGDESDIEK.[I]	2xTMT6plex [N-Term; K12]; 1xOxidation [M4]		1	2	PBANKA_120090	conserved Plasmodium protein, unknown function	PBANKA_120090 [70-81]	0	1877.9		112.6	111.4	47.3	99	87.3	112.2	96.9	133.3	13.9	13.8	5.9	12.2	10.8	13.9	12	16.5	7.6	8.4	3.8	8.6	10.8	12	11.6	12.8	1	1	1	1	1	1	1	1	1.52356	High	-0.624566	0.0006943	0.003713	28.45	-0.624566
[R].SFDNTTTLDEK.[D]	2xTMT6plex [N-Term; K11]; 1xPhospho [S1(99.3)]	PBANKA_091260 1xPhospho [S1374(100)]	1	2	PBANKA_091260	conserved Plasmodium protein, unknown function	PBANKA_091260 [1374-1384]	0	1808.87	S1(Phospho): 100	78.4	72.8	96.2	156.6	105	112	123.2	55.9	25.1	23.3	30.8	50.1	33.6	35.8	39.4	17.9	13.7	14.2	20	35.2	33.6	31	38.2	13.9	1	1	1	1	1	1	1	1	2.89671	High	-2.20737	0.000577	0.002617	22.74	-2.20737
[R].EKEESDENESNHSENDDEEENEDDQNEEK.[K]	3xTMT6plex [N-Term; K2; K29]; 3xPhospho [S5(100); S10(100); S13(100)]	PBANKA_091200 3xPhospho [S757(100); S762(100); S765(100)]	1	2	PBANKA_091200	conserved Plasmodium protein, unknown function	PBANKA_091200 [753-781]	1	4422.67	S5(Phospho): 100; S10(Phospho): 100; S13(Phospho): 100	84.3	119.9	102.5	126.1	82.6	78.7	92.5	113.4	16.9	23.9	20.5	25.2	16.5	15.7	18.5	22.7	9.2	14.6	13.3	17.7	16.5	13.6	17.9	17.6	1	1	1	1	1	1	1	1	3.77118	High	-0.556977	3.638e-05	0.0001454	40.45	-0.556977
[K].KTANDDDDNDIDLFGDSNNDDK.[S]	3xTMT6plex [N-Term; K1; K22]; 3xDeamidated [N]; 1xPhospho [S17(100)]	PBANKA_081420 1xPhospho [S105(100)]	1	6	PBANKA_081420	elongation factor 1-beta, putative	PBANKA_081420 [89-110]	1	3226.4	S17(Phospho): 99.99	83.2	95	85.4	126.1	113.1	109.5	122.7	65.1	40.7	46.4	41.7	61.7	55.3	53.5	60	31.8	22.2	28.3	27.1	43.3	55.3	46.3	58.1	24.7	4	4	4	4	4	4	4	3	2.47478	High	6.26184	0.0001087	0.000603	48.72	6.26184
[K].SVQNISNSINK.[N]	2xTMT6plex [N-Term; K11]; 1xPhospho [S]	PBANKA_143140 1xPhospho [S448(100)]	1	2	PBANKA_143140	conserved Plasmodium protein, unknown function	PBANKA_143140 [441-451]	0	1741.92		99	117.6	76.7	112.7	89.7	98	93	113.2	28	33.3	21.7	31.9	25.4	27.8	26.3	32.1	15.3	20.3	14.1	22.4	25.4	24	25.5	24.9	1	1	1	1	1	1	1	1	2.97504	High	1.66768	5.957e-05	0.0002485	44.1	1.66768
[R].EINNLYQSISMSDDENNNYR.[E]	1xTMT6plex [N-Term]; 1xDeamidated [N/Q]; 1xOxidation [M11]		1	3	PBANKA_061860	conserved Plasmodium protein, unknown function	PBANKA_061860 [61-80]	0	2665.19		59	119.3	109.2	100.9	103.1	95.8	84.6	128	6.4	13	11.9	11	11.2	10.4	9.2	13.9	3.5	7.9	7.7	7.7	11.2	9	8.9	10.8	1	1	1	1	1	1	1	1	3.25397	High	5.76759	0	9.621e-06	43.56	5.76759
[K].QYHSPNENDNTHQDSTTDDEER.[K]	1xTMT6plex [N-Term]; 4xPhospho [S4; S/T]; 1xDeamidated [N/Q]	PBANKA_061370 4xPhospho [S11; S/T]	1	13	PBANKA_061370	RNA-binding protein, putative	PBANKA_061370 [8-29]	0	3182.05		67.2	98.2	74.4	88	170	142.9	69.8	89.5	3.5	5.1	3.9	4.6	8.8	7.4	3.6	4.6	1.9	3.1	2.5	3.2	8.8	6.4	3.5	3.6	1	1	1	1	1	1	1	1						43.66	7.86791
[K].NNNDEQYIWESTADAK.[F]	2xTMT6plex [N-Term; K16]; 1xDeamidated [N]		1	4	PBANKA_143730	endoplasmin, putative (GRP94)	PBANKA_143730 [206-221]	0	2357.13		94.8	114.1	48.6	73.7	137.5	92.6	99.4	139.5	11.7	14.1	6	9.1	17	11.4	12.3	17.3	6.4	8.6	3.9	6.4	17	9.9	11.9	13.4	1	1	1	1	1	1	1	1	1.89246	High	1.13022	0.0008514	0.005556	18.36	1.13022
[K].LEDSIDGAGR.[N]	1xTMT6plex [N-Term]; 1xPhospho [S4(100)]	PBANKA_080410 1xPhospho [S766(100)]	1	1	PBANKA_080410	conserved Plasmodium protein, unknown function	PBANKA_080410 [763-772]	0	1341.62	S4(Phospho): 100	103.5	89.4	90.2	164.2	89.1	96.6	92	75.1	41	35.4	35.7	65.1	35.3	38.3	36.5	29.7	22.4	21.6	23.2	45.7	35.3	33.1	35.3	23.1	1	1	1	1	1	1	1	1	1.89366	High	-1.43043	0.006362	0.05628	13.71	-1.43043
[R].NESSISPSK.[Y]	2xTMT6plex [N-Term; K9]; 1xPhospho [S]		1	6	PBANKA_080670	conserved Plasmodium protein, unknown function	PBANKA_080670 [663-671]	0	1486.76	S4(Phospho): 50; S6(Phospho): 50	71	113	106.1	119.3	104.4	99.8	97.3	89	28.6	45.4	42.7	48	42	40.1	39.1	35.8	15.6	27.7	27.7	33.7	42	34.7	37.9	27.8	2	2	2	2	2	2	2	2	2.91484	High	0.947903	0.00239	0.01935	44.47	0.947903
[K].NNSNNNSFILDENNENSSILHNYNDNK.[G]	2xTMT6plex [N-Term; K27]; 1xPhospho [S/Y]; 1xDeamidated [N22]	PBANKA_143110 1xPhospho [S]	1	2	PBANKA_143110	conserved Plasmodium protein, unknown function	PBANKA_143110 [379-405]	0	3676.66		76.3	65.6	41.1	90.2	120	160	182.4	64.4	4.6	3.9	2.5	5.4	7.2	9.6	10.9	3.9	2.5	2.4	1.6	3.8	7.2	8.3	10.6	3	1	1	1	1	1	1	1	1	1.03747	Low	-7.38842	0.7855	1	17.42	6.66874
[R].TPQESNADDFIVIQDSPIK.[C]	2xTMT6plex [N-Term; K19]; 2xPhospho [T1(100); S]; 1xDeamidated [Q14]	PBANKA_135630 2xPhospho [T694(100); S709(100)]	1	2	PBANKA_135630	conserved Plasmodium protein, unknown function	PBANKA_135630 [694-712]	0	2736.28		66.8	90.9	119	152.6	76.6	94.4	119	80.7	9.2	12.5	16.3	20.9	10.5	13	16.3	11.1	5	7.6	10.6	14.7	10.5	11.2	15.8	8.6	1	1	1	1	1	1	1	1	3.94559	High	8.25841	0.0001087	0.0005992	31.09	8.25841
[K].NNNSGNNGGKSEHASDQDVK.[K]	3xTMT6plex [N-Term; K10; K20]; 1xDeamidated [N]; 2xPhospho [S11(95.1); S15(98.8)]	PBANKA_132970 2xPhospho [S421(80.1); S425(99.8)]	1	16	PBANKA_132970	26S proteasome regulatory subunit RPN2, putative (RPN2)	PBANKA_132970 [411-430]	1	2920.31	S11(Phospho): 90.9; S15(Phospho): 99.78	82.9	102.8	90.9	124.9	110.2	111.8	117.2	59.3	140.5	174	153.9	211.6	186.7	189.3	198.5	100.4	76.7	106.1	99.9	148.6	186.7	163.7	192.2	78	5	5	5	5	5	5	5	5	4.38394	High	1.39038	0.0003692	0.00171	24.31	1.39038
[K].FPNQDDINDLIQHDEEEDGNEEYSDEGNETEGQGK.[E]	2xTMT6plex [N-Term; K35]; 1xPhospho [Y/S/T]		1	8	PBANKA_101580	conserved Plasmodium protein, unknown function	PBANKA_101580 [121-155]	0	4547.92	Y23(Phospho): 48.21; S24(Phospho): 48.21	77.8	63.1	71.5	132.3	98.2	116.6	91.8	148.7	5.9	4.8	5.4	10	7.4	8.8	6.9	11.2	3.2	2.9	3.5	7	7.4	7.6	6.7	8.7	1	1	1	1	1	1	1	1	2.80226	High	0.461173	3.638e-05	0.0001274	39.81	0.461173
[K].DGEILNSDDDEK.[K]	2xTMT6plex [N-Term; K12]; 1xPhospho [S7(100)]	PBANKA_132530 1xPhospho [S456(100)]	1	2	PBANKA_132530	splicing factor 3B subunit 2, putative (SF3B2)	PBANKA_132530 [450-461]	0	1887.86		86.4	110.5	77.2	103.7	96.4	134.4	120.9	70.5	20.5	26.2	18.3	24.6	22.9	31.9	28.7	16.7	11.2	16	11.9	17.3	22.9	27.6	27.8	13	1	1	1	1	1	1	1	1	1.54896	High	0.5266	0.004727	0.03975	16.14	0.5266
[R].SHDSDILEQNR.[Y]	1xTMT6plex [N-Term]; 2xPhospho [S1(100); S4(100)]	PBANKA_031600 2xPhospho [S143(100); S146(100)]	1	2	PBANKA_031600	replication factor C subunit 1, putative	PBANKA_031600 [143-153]	0	1702.7	S1(Phospho): 100; S4(Phospho): 100	84.2	104.7	101.1	137.7	85.4	99.3	121.2	66.5	56.6	70.4	67.9	92.6	57.4	66.7	81.5	44.7	30.9	42.9	44.1	65	57.4	57.7	78.9	34.7	1	1	1	1	1	1	1	1	3.92964	High	-0.0234695	5.957e-05	0.0003501	25.37	-0.0234695
[K].EFETDNENDSNLK.[S]	2xTMT6plex [N-Term; K13]; 1xPhospho [T4(100)]	PBANKA_121110 1xPhospho [T685(100)]	1	4	PBANKA_121110	NLI interacting factor-like phosphatase (NIF4)	PBANKA_121110 [682-694]	0	2092.95	T4(Phospho): 100	79.5	108.2	103.6	131.5	103.4	107.6	99.3	66.9	41.6	56.6	54.2	68.8	54.1	56.3	51.9	35	22.7	34.5	35.2	48.3	54.1	48.7	50.3	27.2	1	1	1	1	1	1	1	1	3.85082	High	1.32907	0	4.73e-05	48.01	1.32907
[K].GFQSEHESPSGLNNIEINDDK.[K]	2xTMT6plex [N-Term; K21]; 2xPhospho [S4(100); S]; 1xDeamidated [N]	PBANKA_081530 2xPhospho [S194(100); S198(99.8)]	1	3	PBANKA_081530	met-10+ like protein, putative	PBANKA_081530 [191-211]	0	2949.3		101.8	124.3	113.4	157.3	88.1	104.3	78.3	32.5	14.1	17.2	15.7	21.8	12.2	14.5	10.8	4.5	7.7	10.5	10.2	15.3	12.2	12.5	10.5	3.5	1	1	1	1	1	1	1	1	2.5929	High	7.02367	0.002056	0.01547	31.19	7.02367
[K].NSIDNNENSIENSDVEK.[N]	2xTMT6plex [N-Term; K17]; 1xDeamidated [N]; 2xPhospho [S9(100); S13(100)]	PBANKA_121160 2xPhospho [S303(100); S307(100)]	1	3	PBANKA_121160	conserved Plasmodium protein, unknown function	PBANKA_121160 [295-311]	0	2540.08	S9(Phospho): 99.97; S13(Phospho): 99.97	106.6	132.1	76.2	107.2	104.6	88	91.3	94.1	24.4	30.2	17.4	24.5	23.9	20.1	20.9	21.5	13.3	18.4	11.3	17.2	23.9	17.4	20.2	16.7	1	1	1	1	1	1	1	1	2.16284	High	8.86182	0.00054	0.002572	29.05	8.86182
[R].ADGDSPNNKPSNSDENNNDNPQK.[K]	3xTMT6plex [N-Term; K9; K23]; 2xPhospho [S5(100)]; 1xDeamidated [N]	PBANKA_051990 2xPhospho [S450(100); S458(97.9)]	1	16	PBANKA_051990	conserved Plasmodium protein, unknown function	PBANKA_051990 [446-468]	0	3319.44		77.1	89.6	82.1	119.2	106.8	104	111.4	109.8	29.7	34.4	31.6	45.8	41.1	40	42.9	42.2	16.2	21	20.5	32.2	41.1	34.6	41.5	32.8	2	2	2	2	2	2	2	2	2.46969	High	0.680196	0.001855	0.01463	31.8	2.51892
[K].TENVDVYR.[K]	1xTMT6plex [N-Term]; 1xPhospho [Y7(100)]	PBANKA_061040 1xPhospho [Y122(100)]; 1xPhospho [Y257(100)]; 1xPhospho [Y412(100)]; 1xPhospho [Y587(100)]; 1xPhospho [Y782(100)]; 1xPhospho [Y997(100)]; 1xPhospho [Y1232(100)]	1	2	PBANKA_061040	ATPase, putative	PBANKA_061040 [116-123]; [136-143]; [156-163]; [176-183]; [196-203]; [216-223]; [236-243]	0	1304.61	Y7(Phospho): 100	82.6	87.2	78.2	123.2	96.5	125.1	103.8	103.4	40.8	43.1	38.7	60.9	47.7	61.9	51.3	51.1	22.3	26.3	25.1	42.8	47.7	53.5	49.7	39.7	1	1	1	1	1	1	1	1	1.80103	High	-0.0514972	0.0009311	0.00739	16.75	-0.0514972
[R].EAGYRSDMENDGK.[I]	2xTMT6plex [N-Term; K13]; 1xOxidation [M8]; 1xPhospho [S6(99.9)]		1	5	PBANKA_110830	pre-mRNA-processing ATP-dependent RNA helicase PRP5, putative (PRP5)	PBANKA_110830 [1036-1048]	1	2025.9	S6(Phospho): 99.93	74.3	83.4	81.6	120.6	87.5	88.4	94.7	169.4	185.9	208.7	204.2	301.6	219	221.2	237	423.7	101.5	127.2	132.6	211.8	219	191.3	229.5	329.1	4	4	4	4	4	4	4	4	2.68964	High	0.139981	0.002719	0.02273	20.02	-0.0341462
[K].KNYNNSDEEQEDNEQIINATYNNEN.[-]	2xTMT6plex [N-Term; K1]; 1xPhospho [Y/S/T]	PBANKA_010950 1xPhospho [S260(82.9)]	1	2	PBANKA_010950	transcription factor with AP2 domain(s), putative (ApiAP2)	PBANKA_010950 [255-279]	1	3540.54	S6(Phospho): 82.88	56.3	135.4	133.1	113.4	80.6	102.1	60.5	118.6	5.9	14.1	13.9	11.8	8.4	10.6	6.3	12.4	3.2	8.6	9	8.3	8.4	9.2	6.1	9.6	1	1	1	1	1	1	1	1	3.5284	High	-3.29331	0.005766	0.05219	20.29	-0.789867
[K].MLYDSDMDENNMMDQNFMDGTYNNGVNGR.[G]	1xTMT6plex [N-Term]; 1xPhospho [S/Y/T]; 2xDeamidated [N24; N27]; 5xOxidation [M1; M7; M12; M13; M18]	PBANKA_120590 1xPhospho [S/Y]	1	4	PBANKA_120590	transcription factor with AP2 domain(s), putative (ApiAP2)	PBANKA_120590 [326-354]	0	3782.38		72.6	87.9	79	109.5	153.8	80.9	96.3	120	3.1	3.8	3.4	4.7	6.6	3.5	4.1	5.2	1.7	2.3	2.2	3.3	6.6	3	4	4	1	1	1	1	1	1	1	1						28.23	-3.94382
[K].NNIDNSYTHSENEEDYIIHDFYK.[N]	2xTMT6plex [N-Term; K23]; 1xPhospho [Y16(80.8)]	PBANKA_093190 1xPhospho [Y989(80.8)]	1	4	PBANKA_093190	serine esterase, putative	PBANKA_093190 [974-996]	0	3398.53	Y16(Phospho): 80.78	62.6	113.5	97.1	94.8	96.3	123.5	99.5	112.8	7.1	13	11.1	10.8	11	14.1	11.4	12.9	3.9	7.9	7.2	7.6	11	12.2	11	10	1	1	1	1	1	1	1	1	3.01095	High	-0.0521401	0	7.741e-05	23.47	-0.0521401
[K].DCTNCLNDAKEFVENFNELNK.[D]	3xTMT6plex [N-Term; K10; K21]; 2xDeamidated [N7; N]; 2xCarbamidomethyl [C2; C5]; 1xPhospho [T3(100)]	PBANKA_000340 1xPhospho [T170(100)]	1	2	PBANKA_000340	BIR protein,PIR protein	PBANKA_000340 [168-188]	1	3343.55	T3(Phospho): 100	43.7	56.8	33.1	44.2	33.4	35.9	45.6	507.3	3.7	4.8	2.8	3.7	2.8	3	3.8	42.5	2	2.9	1.8	2.6	2.8	2.6	3.7	33	1	1	1	1	1	1	1	1	1.35575	High	-0.499325	0.003682	0.02962
[R].TDNIHGNNNNINDK.[S]	2xTMT6plex [N-Term; K14]		1	2	PBANKA_121700	peptidase, putative	PBANKA_121700 [410-423]	0	2041.05		70.2	110.8	96.8	107.5	90.1	126.6	94.3	103.8	17.8	28.1	24.5	27.2	22.8	32	23.9	26.3	9.7	17.1	15.9	19.1	22.8	27.7	23.1	20.4	1	1	1	1	1	1	1	1	2.48896	High	0.956233	0	7.653e-05	26.31	0.956233
[K].IYNTNEDSDEDKNK.[D]	3xTMT6plex [N-Term; K12; K14]; 1xPhospho [S8(100)]	PBANKA_031360 1xPhospho [S169(99.7)]	1	4	PBANKA_031360	conserved Plasmodium protein, unknown function	PBANKA_031360 [162-175]	1	2452.18	S8(Phospho): 100	91	103.6	93.2	137.2	100.8	106.8	108.2	59.3	266.9	303.8	273.1	402.1	295.4	313	317.2	173.8	145.7	185.2	177.3	282.4	295.4	270.7	307.2	135	2	2	2	2	2	2	2	2	3.85348	High	1.06364	0.0001278	0.0007767	24.43	1.06364
[K].NTASNETEIEVSQNLSENEHK.[Q]	2xTMT6plex [N-Term; K21]; 1xPhospho [T/S]	PBANKA_124240 1xPhospho [S371(100)]	1	8	PBANKA_124240	conserved Plasmodium protein, unknown function	PBANKA_124240 [356-376]	0	2911.37		101.4	99.9	84	142.7	93.3	95.5	103.7	79.5	49.5	48.7	41	69.6	45.5	46.6	50.6	38.8	27	29.7	26.6	48.9	45.5	40.3	49	30.1	2	2	2	2	2	2	2	2	5.14889	High	0.151454	0	2.65e-07	95.88	-0.347073
[K].SSSYYNNK.[H]	2xTMT6plex [N-Term; K8]; 1xPhospho [S3(92.6)]		2	2	PBANKA_093720.2	asparagine-rich antigen, putative	PBANKA_093720.2 [1207-1214]	0	1500.71		104.5	128	101.4	141.3	80.1	83.2	80.4	81.1	327.7	401.1	317.9	442.8	251.1	260.6	252	254.3	178.9	244.5	206.4	311	251.1	225.4	244	197.5	2	2	2	2	2	2	2	2	2.77788	High	-0.11295	0.001695	0.01327	8.39	-0.11295
[R].YNSVNSVINDNNVGNDNLGK.[Y]	2xTMT6plex [N-Term; K20]; 1xDeamidated [N15]; 1xPhospho [Y1(96.6)]	PBANKA_134170 1xPhospho [Y227(86.3)]	1	2	PBANKA_134170	conserved Plasmodium protein, unknown function	PBANKA_134170 [227-246]	0	2689.29	Y1(Phospho): 86.31	122.8	167.6	106.5	131.8	34	89.8	35.2	112.3	11.5	15.7	10	12.4	3.2	8.4	3.3	10.6	6.3	9.6	6.5	8.7	3.2	7.3	3.2	8.2	1	1	1	1	1	1	1	1	1.96687	High	1.20572	0.0007888	0.004507	34.27	1.20572
[K].EVEMGEISDVNTVDAR.[S]	1xTMT6plex [N-Term]; 1xOxidation [M4]; 2xPhospho [S8(100); T12(100)]	PBANKA_030370 2xPhospho [S614(100); T618(100)]	1	2	PBANKA_030370	DNA repair endonuclease, putative	PBANKA_030370 [607-622]	0	2168.9	S8(Phospho): 100; T12(Phospho): 100	51.9	86.7	82.6	89.5	164	113.4	104.4	107.5	6.8	11.3	10.8	11.7	21.4	14.8	13.6	14	3.7	6.9	7	8.2	21.4	12.8	13.2	10.9	1	1	1	1	1	1	1	1	3.65778	High	-3.93703	0	2.227e-05	55	-3.93703
[K].VMNRDEEDNNSDEK.[V]	2xTMT6plex [N-Term; K14]; 1xPhospho [S11(100)]; 1xDeamidated [N9]; 1xOxidation [M2]	PBANKA_145460 1xPhospho [S2006]; 1xPhospho [S4015]; 1xPhospho [S6038]; 1xPhospho [S8075]; 1xPhospho [S10140]	1	1	PBANKA_145460	conserved Plasmodium protein, unknown function	PBANKA_145460 [1996-2009]; [2010-2023]; [2024-2037]; [2038-2051]; [2066-2079]	1	2249.96		80.6	95.2	96.7	136.3	100.6	110.4	118.9	61.4	137.5	162.6	165.1	232.8	171.7	188.5	203	104.8	75.1	99.1	107.2	163.5	171.7	163	196.6	81.4	1	1	1	1	1	1	1	1	1.39558	Medium	0.973909	0.01431	0.1421	19.23	0.322857
[K].SSDKDEEKDTNEATANGGVASTSAIASQNK.[Q]	4xTMT6plex [N-Term; K4; K8; K30]; 1xDeamidated [N]; 1xPhospho [S/T]		1	13	PBANKA_142870	eukaryotic translation initiation factor 3 subunit 10, putative	PBANKA_142870 [288-317]	2	4022.98	S1(Phospho): 48.98; S2(Phospho): 48.98	84.6	90.5	77.6	121.1	87.1	103.2	108.3	127.6	36.8	39.4	33.7	52.7	37.9	44.9	47.1	55.5	20.1	24	21.9	37	37.9	38.8	45.6	43.1	2	2	2	2	2	2	2	2	4.2625	High	0.639203	0.0001929	0.0009144	28.87	1.53767
[K].TNSFNSTNENNNNEQNAQGEIK.[V]	2xTMT6plex [N-Term; K22]		1	2	PBANKA_130700	conserved Plasmodium protein, unknown function	PBANKA_130700 [286-307]	0	2925.4		74.2	83.6	70.4	106.1	100.6	98.2	125.5	141.3	5.7	6.4	5.4	8.1	7.7	7.5	9.6	10.8	3.1	3.9	3.5	5.7	7.7	6.5	9.3	8.4	1	1	1	1	1	1	1	1	1.23405	High	-0.186025	0.00224	0.01778	21.89	-0.186025
[K].SIHGENNINELNDEGNK.[D]	2xTMT6plex [N-Term; K17]; 1xPhospho [S1(100)]	PBANKA_080700 1xPhospho [S1169(100)]	1	2	PBANKA_080700	DNA-directed RNA polymerase II subunit RPB1, putative (RPB1)	PBANKA_080700 [1169-1185]	0	2435.16	S1(Phospho): 100	101.1	78.9	79.2	156.5	111.3	92.7	74.5	105.7	21.4	16.7	16.8	33.2	23.6	19.7	15.8	22.4	11.7	10.2	10.9	23.3	23.6	17	15.3	17.4	1	1	1	1	1	1	1	1	3.47061	High	2.26278	0	3.667e-05	33.3	2.26278
[K].EIKLSSEDEREEQIK.[N]	3xTMT6plex [N-Term; K3; K15]; 2xPhospho [S5(100); S6(100)]	PBANKA_110890 2xPhospho [S101(100); S102(100)]	1	1	PBANKA_110890	conserved Plasmodium protein, unknown function	PBANKA_110890 [97-111]	2	2680.35	S5(Phospho): 100; S6(Phospho): 100	95.8	112.5	108.3	154.3	96.2	99.4	74.1	59.5	33	38.7	37.3	53.1	33.1	34.2	25.5	20.5	18	23.6	24.2	37.3	33.1	29.6	24.7	15.9	1	1	1	1	1	1	1	1	2.5115	High	-3.44507	0.004757	0.04007
[R].NNTILNNIEDMNSDNSSK.[N]	2xTMT6plex [N-Term; K18]; 1xOxidation [M11]		1	2	PBANKA_041640	conserved Plasmodium protein, unknown function	PBANKA_041640 [112-129]	0	2497.22		97.2	113.9	66.4	99.5	123	103.4	93.7	102.8	21.4	25.1	14.6	21.9	27.1	22.8	20.7	22.7	11.7	15.3	9.5	15.4	27.1	19.7	20	17.6	1	1	1	1	1	1	1	1	2.4989	High	0.866631	0	8.036e-05	42.05	0.866631
[K].HNMTVEELNR.[K]	1xTMT6plex [N-Term]; 1xOxidation [M3]		1	2	PBANKA_021210	eukaryotic translation initiation factor 2 alpha subunit, putative	PBANKA_021210 [126-135]	0	1487.75		86.5	150.3	68.3	51	153.2	57.9	102	130.9	6	10.5	4.8	3.6	10.7	4	7.1	9.1	3.3	6.4	3.1	2.5	10.7	3.5	6.9	7.1	1	1	1	1	1	1	1	1	2.19426	High	1.52937	0.0006943	0.003738	18.71	1.52937
[R].SGNNNANGNQENYK.[K]	2xTMT6plex [N-Term; K14]; 1xPhospho [S1(100)]	PBANKA_142690 1xPhospho [S112(100)]	1	4	PBANKA_142690	RNA helicase, putative	PBANKA_142690 [112-125]	0	2061.94		103.8	119.7	80.5	120.6	87.9	111.8	94	81.7	58.6	67.6	45.4	68.1	49.6	63.1	53.1	46.1	32	41.2	29.5	47.8	49.6	54.6	51.4	35.8	2	2	2	2	2	2	2	2	3.11118	High	1.23796	3.638e-05	0.0001399	42.54	1.23796
[K].RLPSSSEGDQLK.[K]	2xTMT6plex [N-Term; K12]; 2xPhospho [S4(100)]	PBANKA_061160 2xPhospho [S10(100); S11(98.7)]	1	19	PBANKA_061160	ribonucleoside-diphosphate reductase, large subunit, putative	PBANKA_061160 [7-18]	1	1934.94		120.3	154.9	121.2	160.1	61	63.2	62.4	56.9	752.4	968.8	757.8	1001.3	381.2	395.1	390.3	355.6	410.8	590.6	492	703.2	381.2	341.7	378	276.2	8	8	8	8	8	8	8	8	4.38358	High	1.32689	8.7e-05	0.0004333	32.92	0.948361
[K].TENDKENTSEYDDNEFVINK.[K]	3xTMT6plex [N-Term; K5; K20]; 1xPhospho [T8(83.6)]	PBANKA_144250 1xPhospho [T286(83.6)]	1	9	PBANKA_144250	histone acetyltransferase, putative	PBANKA_144250 [279-298]	1	3171.5	T8(Phospho): 83.6	78	109.9	91.9	111.6	104.2	103.4	115	85.9	27.5	38.7	32.3	39.3	36.7	36.4	40.5	30.3	15	23.6	21	27.6	36.7	31.5	39.2	23.5	1	1	1	1	1	1	1	1	3.31678	High	-0.677906	0.001895	0.01512	30.31	-0.677906
[K].SLGSKESENEER.[I]	2xTMT6plex [N-Term; K5]; 1xPhospho [S]	PBANKA_133440 1xPhospho [S12(100)]	1	2	PBANKA_133440	inorganic anion antiporter, putative	PBANKA_133440 [6-17]	1	1902.92		92.5	104.2	90.9	135	96.7	111.1	99.7	69.9	135.4	152.6	133.1	197.6	141.5	162.6	146	102.4	73.9	93	86.4	138.8	141.5	140.6	141.4	79.5	1	1	1	1	1	1	1	1	2.93111	High	1.33205	0.0004607	0.001993	17.46	1.33205
[R].NYDDNSEK.[F]	2xTMT6plex [N-Term; K8]; 1xPhospho [Y/S]	PBANKA_103790 1xPhospho [S28(100)]	1	1	PBANKA_103790	conserved Plasmodium protein, unknown function	PBANKA_103790 [23-30]	0	1522.68		97.1	104.2	96.1	147.6	114.4	108.6	79.7	52.3	696.5	747.8	689.4	1059.1	820.9	779.5	571.5	375.3	380.3	455.9	447.6	743.8	820.9	674.1	553.5	291.5	1	1	1	1	1	1	1	1	3.80884	High	0.0637733	0.005658	0.04958	31.32	-0.105393
[K].NEQESEQENEHKNEDYAK.[K]	3xTMT6plex [N-Term; K12; K18]; 1xDeamidated [N/Q]; 1xPhospho [S5(100)]	PBANKA_090310 1xPhospho [S574(100)]	1	5	PBANKA_090310	nucleolar preribosomal assembly protein, putative	PBANKA_090310 [570-587]	1	2989.37	S5(Phospho): 100	98.9	109.1	90.1	137.2	84.7	110	94.3	75.7	108.4	119.6	98.7	150.4	92.8	120.5	103.4	82.9	59.2	72.9	64.1	105.6	92.8	104.2	100.1	64.4	2	2	2	2	2	2	2	2	5.34378	High	7.79587	0	0.0001214	39.26	7.79587
[K].QNSNDAEVASVENKASENR.[E]	2xTMT6plex [N-Term; K14]; 1xPhospho [S]	PBANKA_145250 1xPhospho [S663(100)]	1	2	PBANKA_145250	conserved Plasmodium protein, unknown function	PBANKA_145250 [648-666]	1	2600.24		96.4	103.5	89.9	139.6	129	95.5	71.8	74.3	26.7	28.7	25	38.7	35.8	26.5	19.9	20.6	14.6	17.5	16.2	27.2	35.8	22.9	19.3	16	1	1	1	1	1	1	1	1	2.7199	High	-0.863686	0.0006213	0.002778	18.93	-0.863686
[K].HVGTDTFDINNETTIMMEENENSENYIK.[S]	2xTMT6plex [N-Term; K28]; 2xOxidation [M16; M17]; 1xPhospho [T/S/Y]	PBANKA_060630 1xPhospho [S513(77.3)]	1	6	PBANKA_060630	conserved Plasmodium protein, unknown function	PBANKA_060630 [491-518]	0	3858.71	S23(Phospho): 77.28	71.1	67.9	73.7	121.6	113.9	59.9	126.9	164.9	5.5	5.2	5.7	9.4	8.8	4.6	9.8	12.7	3	3.2	3.7	6.6	8.8	4	9.5	9.9	1	1	1	1	1	1	1	1	2.17569	High	3.36303	0.0001929	0.0009978	32.29	3.36303
[K].EKDNNSGEENSNSEQK.[L]	3xTMT6plex [N-Term; K2; K16]; 2xPhospho [S6(100); S]	PBANKA_093720.2 2xPhospho [S428(100); S433(98.5)]	2	4	PBANKA_093720.2	asparagine-rich antigen, putative	PBANKA_093720.2 [423-438]	1	2656.17	S6(Phospho): 99.91; S11(Phospho): 50.05; S13(Phospho): 50.05	94.2	94.6	94.2	151	93.8	102.4	100.7	69.1	166.1	166.8	166	266.1	165.3	180.5	177.5	121.8	90.7	101.7	107.8	186.9	165.3	156.1	171.9	94.6	2	2	2	2	2	2	2	2	3.81084	High	0.702792	0.0003306	0.001441	46.93	-0.61205
[R].NSEMEHGNNLYK.[D]	2xTMT6plex [N-Term; K12]; 1xOxidation [M4]; 1xPhospho [S2(100)]	PBANKA_040600 1xPhospho [S668(100)]	1	2	PBANKA_040600	conserved Plasmodium protein, unknown function	PBANKA_040600 [667-678]	0	1989.91	S2(Phospho): 100	85.3	103	102.1	141.2	97.1	102.3	116.2	52.8	64.1	77.4	76.7	106.1	73	76.9	87.4	39.7	35	47.2	49.8	74.5	73	66.5	84.6	30.8	1	1	1	1	1	1	1	1	2.76308	High	0.119899	0.0008711	0.006088	37.87	0.119899
[K].TTDSESATNKDATPGEDQTSANGTTTTVTSTTDAK.[T]	3xTMT6plex [N-Term; K10; K35]; 3xDeamidated [N9; Q18; N22]; 1xPhospho [S/T]		1	68	PBANKA_143920	polyadenylate-binding protein, putative (PABP)	PBANKA_143920 [303-337]	1	4274.97	T24(Phospho): 24.15; T25(Phospho): 24.15; T26(Phospho): 24.15; T27(Phospho): 24.15	66.4	99.9	80.1	91	105	115.4	103	139.3	50.6	76.1	61	69.3	80	87.9	78.5	106.1	27.6	46.4	39.6	48.7	80	76	76	82.4	7	7	7	7	7	7	7	7	3.10677	High	3.04646	0	4.658e-06	44.71	3.04646
[K].GNDNLINNSGK.[A]	2xTMT6plex [N-Term; K11]; 1xPhospho [S9(100)]	PBANKA_010080 1xPhospho [S884(100)]	1	2	PBANKA_010080	conserved Plasmodium protein, unknown function	PBANKA_010080 [876-886]	0	1683.85	S9(Phospho): 100	83.7	83	91.3	145	103.7	84.9	109	99.4	13.6	13.5	14.8	23.5	16.8	13.8	17.7	16.1	7.4	8.2	9.6	16.5	16.8	11.9	17.1	12.5	1	1	1	1	1	1	1	1	2.29416	High	0.929677	0.0006943	0.003858	35.05	0.929677
[R].EINNLYQSISMSDDENNNYR.[E]	1xTMT6plex [N-Term]; 1xOxidation [M11]		1	2	PBANKA_061860	conserved Plasmodium protein, unknown function	PBANKA_061860 [61-80]	0	2664.2		37.8	42.4	108.2	148.5	134.3	106.3	105.6	117	3.7	4.1	10.5	14.4	13	10.3	10.2	11.3	2	2.5	6.8	10.1	13	8.9	9.9	8.8	1	1	1	1	1	1	1	1	2.2248	High	1.58001	8.7e-05	0.0004456	30.42	1.58001
[K].KNSDELRLEEDEINER.[N]	2xTMT6plex [N-Term; K1]; 1xPhospho [S3(100)]	PBANKA_060630 1xPhospho [S437(100)]	1	4	PBANKA_060630	conserved Plasmodium protein, unknown function	PBANKA_060630 [435-450]	2	2527.24		104.7	128.4	103.5	142.9	74.4	81.1	75.7	89.2	108.6	133.2	107.4	148.2	77.2	84.2	78.6	92.6	59.3	81.2	69.7	104.1	77.2	72.8	76.1	71.9	2	2	2	2	2	2	2	2	3.57205	High	0.373242	5.957e-05	0.0002256	22.37	-0.139247
[K].NISEENIK.[L]	2xTMT6plex [N-Term; K8]; 1xPhospho [S3(100)]	PBANKA_123650 1xPhospho [S686(100)]	1	2	PBANKA_123650	conserved Plasmodium protein, unknown function, fragment	PBANKA_123650 [684-691]	0	1484.78	S3(Phospho): 100	69.8	66.3	56.9	98.7	135.2	126.9	136	110.1	6	5.7	4.9	8.5	11.7	11	11.8	9.5	3.3	3.5	3.2	6	11.7	9.5	11.4	7.4	1	1	1	1	1	1	1	1	2.11596	High	0.87806	0.003177	0.02636	30.82	0.87806
[K].GKDEVSEEEDDEENDEEESNEHNK.[N]	3xTMT6plex [N-Term; K2; K24]; 1xDeamidated [N]; 2xPhospho [S6(100); S19(100)]	PBANKA_080230 2xPhospho [S192(100); S205(100)]	1	10	PBANKA_080230	E3 ubiquitin-protein ligase, putative	PBANKA_080230 [187-210]	1	3683.49	S6(Phospho): 100; S19(Phospho): 100	78.9	103.4	108.1	140	92.7	116.8	97.1	63.1	60.8	79.7	83.3	107.9	71.5	90.1	74.9	48.7	33.2	48.6	54.1	75.8	71.5	77.9	72.5	37.8	5	5	5	5	5	5	5	5	4.59317	High	4.73215	5.957e-05	0.0004023	54.2	4.73215
[R].YSQNINNNNNNNNNNNNMR.[D]	1xTMT6plex [N-Term]; 1xDeamidated [N]; 1xOxidation [M18]		1	171	PBANKA_020480	secreted ookinete protein, putative (PSOP24)	PBANKA_020480 [746-764]	0	2526.1		46.1	61.9	53.3	67.2	118	120	100.7	232.9	2.9	3.9	3.4	4.3	7.5	7.6	6.4	14.8	1.6	2.4	2.2	3	7.5	6.6	6.2	11.5	1	1	1	1	1	1	1	1	2.14144	High	0.519776	0	4.286e-05	55.97	0.519776
[K].NEEEDNEQISESDNELQIEK.[E]	2xTMT6plex [N-Term; K20]; 1xDeamidated [N14]; 1xPhospho [S10(90.6)]	PBANKA_110460 1xPhospho [S622(90.6)]	1	4	PBANKA_110460	conserved Plasmodium protein, unknown function	PBANKA_110460 [613-632]	0	2931.3	S10(Phospho): 90.61	61.5	93.6	93.1	107.2	77.2	78.8	86.7	201.9	12.8	19.5	19.4	22.4	16.1	16.4	18.1	42.1	7	11.9	12.6	15.7	16.1	14.2	17.5	32.7	1	1	1	1	1	1	1	1	2.95449	High	1.73472	0	7.216e-06	35.36	1.73472
[K].TNDNNLNNMNNNYNENTYQNR.[N]	1xTMT6plex [N-Term]; 1xDeamidated [N/Q]; 1xOxidation [M9]		1	10	PBANKA_060560	conserved Plasmodium protein, unknown function	PBANKA_060560 [648-668]	0	2820.21		71.1	80.8	52.9	80.8	137.3	112.2	101.7	163.3	4.8	5.4	3.5	5.4	9.2	7.5	6.8	10.9	2.6	3.3	2.3	3.8	9.2	6.5	6.6	8.5	1	1	1	1	1	1	1	1	3.47922	High	0.362119	0	3.353e-07	71.06	0.362119
[K].TIEEYDNFSK.[N]	2xTMT6plex [N-Term; K10]; 1xPhospho [T/Y/S]	PBANKA_145460 1xPhospho [S107(100)]	1	4	PBANKA_145460	conserved Plasmodium protein, unknown function	PBANKA_145460 [99-108]	0	1783.86		90.4	96.8	89.4	137.4	99.7	94.7	107.3	84.3	48.9	52.3	48.4	74.3	53.9	51.2	58	45.6	26.7	31.9	31.4	52.2	53.9	44.3	56.2	35.4	2	2	2	2	2	2	2	2	2.69339	High	2.25557	0.0004442	0.001928	37.11	2.25557
[K].NNLNFSENGNDMDR.[Q]	1xTMT6plex [N-Term]; 1xPhospho [S6(100)]; 1xOxidation [M12]	PBANKA_062130 1xPhospho [S511(100)]	1	2	PBANKA_062130	conserved Plasmodium protein, unknown function	PBANKA_062130 [506-519]	0	1964.8		91.5	101.9	86.8	130.4	96.7	100.7	108.5	83.3	14.3	15.9	13.6	20.4	15.1	15.7	16.9	13	7.8	9.7	8.8	14.3	15.1	13.6	16.4	10.1	1	1	1	1	1	1	1	1	1.1795	High	0.68662	0.00565	0.04947	24.61	0.68662
[K].GYGANNSNTSNNINSR.[I]	1xTMT6plex [N-Term]; 1xDeamidated [N]		1	3	PBANKA_093960	polyadenylate-binding protein-interacting protein 1, putative (PAIP1)	PBANKA_093960 [1459-1474]	0	1912.89		82.6	82.5	37.7	73.4	88.9	128.2	115.8	190.9	6.4	6.4	2.9	5.7	6.9	9.9	9	14.8	3.5	3.9	1.9	4	6.9	8.6	8.7	11.5	1	1	1	1	1	1	1	1	1.85015	High	-1.77324	0.0004442	0.001926	50.64	-1.77324
[K].NALNGNTDASVNK.[T]	2xTMT6plex [N-Term; K13]; 1xDeamidated [N4]; 2xPhospho [T7(100); S10(100)]	PBANKA_101140 2xPhospho [T278(100); S281(100)]	1	2	PBANKA_101140	DNA topoisomerase II, putative	PBANKA_101140 [272-284]	0	1936.88	T7(Phospho): 100; S10(Phospho): 100	97.5	121.7	91.7	124.8	94.7	93.1	89.6	86.9	23.3	29	21.9	29.8	22.6	22.2	21.4	20.7	12.7	17.7	14.2	20.9	22.6	19.2	20.7	16.1	1	1	1	1	1	1	1	1	2.00059	High	0.690999	0.0004268	0.001881	26.37	0.690999
[K].ANALPSPK.[G]	2xTMT6plex [N-Term; K8]; 1xPhospho [S6(100)]	PBANKA_114590 1xPhospho [S189(100)]	1	2	PBANKA_114590	conserved rodent malaria protein, unknown function	PBANKA_114590 [184-191]	0	1335.74	S6(Phospho): 100	88.3	104.6	105	146.8	94.6	98.2	97.9	64.6	50	59.2	59.5	83.2	53.6	55.6	55.5	36.6	27.3	36.1	38.6	58.4	53.6	48.1	53.7	28.4	2	2	2	2	2	2	2	2	1.64657	High	3.14309	0.004975	0.04195	16.45	1.00826
[K].GYTESSGDGNTNNEQHNENMEMNNK.[N]	2xTMT6plex [N-Term; K25]; 2xDeamidated [N/Q]; 2xOxidation [M20; M22]		1	25	PBANKA_092360	GrpE protein homolog, mitochondrial, putative (MGE1)	PBANKA_092360 [61-85]	0	3306.38		61.2	119.4	102.9	93.9	97.6	99.5	96.4	129	14.3	27.9	24	21.9	22.8	23.2	22.5	30.1	7.8	17	15.6	15.4	22.8	20.1	21.8	23.4	2	2	2	2	2	2	2	2	2.49963	High	2.68762	0	9.54e-05	46.96	2.68762
[K].KYVETESYIER.[K]	2xTMT6plex [N-Term; K1]; 2xPhospho [T5(99.9); S7(90.6)]	PBANKA_123710 2xPhospho [T1965(99.9); S1967(90.6)]	1	2	PBANKA_123710	conserved Plasmodium protein, unknown function	PBANKA_123710 [1961-1971]	1	2034.96	T5(Phospho): 99.87; S7(Phospho): 90.6	88.3	109.8	80	108.9	100.6	104.1	122.9	85.5	50	62.2	45.3	61.7	57	59	69.6	48.4	27.3	37.9	29.4	43.3	57	51	67.4	37.6	1	1	1	1	1	1	1	1	2.90487	High	0.908553	0.000388	0.001788	25.74	0.908553
[K].DGVEVLSSDEEDEEEEYEEEDNTLK.[N]	2xPhospho [S/Y]; 1xTMT6plex [K25]; 1xAcetyl [N-Term]	PBANKA_101670 2xPhospho [S/Y]; 1xAcetyl [N-Term]	1	19	PBANKA_101670	conserved Plasmodium protein, unknown function	PBANKA_101670 [168-192]	0	3362.3		34.4	37.4	26.8	42	45.1	37.7	73.3	503.3	7.7	8.4	6	9.4	10.1	8.4	16.4	112.7	4.2	5.1	3.9	6.6	10.1	7.3	15.9	87.5	2	3	2	3	4	3	4	4						41.3	8.64575
[K].SESSFYHDK.[K]	2xTMT6plex [N-Term; K9]; 1xPhospho [S1(98.8)]		1	2	PBANKA_132010	conserved Plasmodium protein, unknown function (UIS25)	PBANKA_132010 [386-394]	0	1637.76	S1(Phospho): 98.76	78.4	97	101.2	136.5	102.6	98.6	115.4	70.3	45.2	55.9	58.4	78.7	59.2	56.9	66.6	40.6	24.7	34.1	37.9	55.3	59.2	49.2	64.5	31.5	2	2	2	2	2	2	2	2	2.51576	High	1.52198	0.006181	0.05514
[K].SQNDESDNNEEKGEEQLNNLK.[N]	3xTMT6plex [N-Term; K12; K21]; 1xDeamidated [N/Q]; 2xPhospho [S1(100); S6(100)]	PBANKA_142840 2xPhospho [S56(100); S61(100)]	1	2	PBANKA_142840	conserved Plasmodium protein, unknown function	PBANKA_142840 [56-76]	1	3282.47	S1(Phospho): 100; S6(Phospho): 100	96.1	115.1	92.5	129.6	104.3	85.5	92.1	84.7	15.2	18.2	14.6	20.5	16.5	13.5	14.6	13.4	8.3	11.1	9.5	14.4	16.5	11.7	14.1	10.4	1	1	1	1	1	1	1	1	2.01188	High	5.48643	0.004727	0.03971
[K].NLDKNSDIDSEDSR.[K]	2xTMT6plex [N-Term; K4]; 1xPhospho [S6(99.3)]	PBANKA_120210 1xPhospho [S653(100)]	1	5	PBANKA_120210	conserved Plasmodium protein, unknown function	PBANKA_120210 [648-661]	1	2146.01	S6(Phospho): 98.1	87.4	98.2	95.9	139.8	103.8	100.2	112.5	62	326.9	367.3	358.7	522.9	388.3	374.9	420.9	231.9	178.5	223.9	232.9	367.2	388.3	324.2	407.6	180.1	3	3	3	3	3	3	3	3	4.83334	High	0.493853	0	6.016e-05	32.21	-0.751297
[K].NHEQTENSEIEK.[E]	2xTMT6plex [N-Term; K12]; 1xPhospho [S8(99.8)]	PBANKA_010870 1xPhospho [S455(99.8)]	1	2	PBANKA_010870	conserved Plasmodium protein, unknown function	PBANKA_010870 [448-459]	0	1995.94	S8(Phospho): 99.84	75.5	71.3	97.6	153.3	103.5	105.4	131.7	61.7	26.9	25.4	34.8	54.7	36.9	37.6	47	22	14.7	15.5	22.6	38.4	36.9	32.5	45.5	17.1	1	1	1	1	1	1	1	1	3.18568	High	-0.0345877	3.638e-05	0.0001461	38.21	-0.0345877
[K].RTPSPQYNK.[S]	2xTMT6plex [N-Term; K9]; 2xPhospho [T2(100); S/Y]	PBANKA_100950 2xPhospho [T2734(100); S/Y]	1	1	PBANKA_100950	NAD(P)H-dependent glutamate synthase, putative	PBANKA_100950 [2733-2741]	1	1708.82	T2(Phospho): 99.99; S4(Phospho): 50; Y7(Phospho): 50	82.2	72.3	75.7	132.7	98.9	87.6	111.5	139.1	30.6	26.9	28.2	49.4	36.8	32.6	41.5	51.8	16.7	16.4	18.3	34.7	36.8	28.2	40.2	40.2	1	1	1	1	1	1	1	1	3.04316	High	0.484828	0.0006213	0.002761	13.9	0.484828
[K].NNIDNSPSSDIYNNTK.[I]	2xTMT6plex [N-Term; K16]; 2xPhospho [S6(98.4); S/Y/T]	PBANKA_062220 2xPhospho [S313(98.4); S/Y/T]	1	3	PBANKA_062220	conserved Plasmodium protein, unknown function	PBANKA_062220 [308-323]	0	2414.07	S6(Phospho): 98.36; S8(Phospho): 50.62; S9(Phospho): 50.62	101.4	129.1	76	100.7	97.4	94.9	105.4	95.3	15.2	19.4	11.4	15.1	14.6	14.2	15.8	14.3	8.3	11.8	7.4	10.6	14.6	12.3	15.3	11.1	1	1	1	1	1	1	1	1	1.94262	High	-4.80066	0.003979	0.03331	33.05	-4.80066
[R].NNNDNDDNSIYDENYETNDENLDSFDNFNIAK.[I]	2xTMT6plex [N-Term; K32]; 2xDeamidated [N]; 1xPhospho [S9(79.8)]	PBANKA_124270 1xPhospho [S596(79.8)]	1	4	PBANKA_124270	AP-1 complex subunit beta, putative	PBANKA_124270 [588-619]	0	4325.78	S9(Phospho): 79.75	69.4	110.2	87.5	93.2	103.3	79.7	119.2	137.5	4	6.4	5.1	5.4	6	4.6	6.9	8	2.2	3.9	3.3	3.8	6	4	6.7	6.2	1	1	1	1	1	1	1	1	2.18751	High	6.46539	0.0009266	0.006772	29.83	6.46539
[K].NAQGHLSAHK.[K]	2xTMT6plex [N-Term; K10]; 1xPhospho [S7(100)]	PBANKA_040110 1xPhospho [S1274(100)]	1	2	PBANKA_040110	serine/threonine protein kinase, putative (SRPK1)	PBANKA_040110 [1268-1277]	0	1600.84		144	106.9	60.6	158.4	120.2	46.8	106.7	56.4	12.8	9.5	5.4	14.1	10.7	4.2	9.5	5	7	5.8	3.5	9.9	10.7	3.6	9.2	3.9	1	1	1	1	1	1	1	1	1.34433	High	0.895751	0.002742	0.02361	26.93	0.895751
[R].NTIETISDLDNINSNDDK.[N]	2xTMT6plex [N-Term; K18]; 1xPhospho [T/S]	PBANKA_145530 1xPhospho [S82(87.7)]	1	10	PBANKA_145530	conserved Plasmodium protein, unknown function	PBANKA_145530 [76-93]	0	2559.22		90.1	118.3	80.7	103.1	96.6	120.5	120.4	70.1	30.6	40.2	27.4	35	32.8	40.9	40.9	23.8	16.7	24.5	17.8	24.6	32.8	35.4	39.6	18.5	3	3	3	3	3	3	3	3	4.24691	High	-4.33717	0	1.406e-05	37.85	0.49894
[K].TRDDDSEENIDLENNDIITSFYNK.[K]	2xTMT6plex [N-Term; K24]; 2xDeamidated [N]; 1xPhospho [S6(79.2)]		1	5	PBANKA_050490	histone acetyltransferase, putative	PBANKA_050490 [951-974]	1	3400.54	S6(Phospho): 79.25	78.4	103.9	64.1	81	114.4	120.1	121.7	116.3	13.4	17.7	10.9	13.8	19.5	20.5	20.8	19.8	7.3	10.8	7.1	9.7	19.5	17.7	20.1	15.4	2	2	2	2	2	2	2	2	2.72037	High	5.95385	0.003165	0.02604	39.37	5.95385
[R].NVASNEEEENSNAETIDNIYNVGR.[N]	1xTMT6plex [N-Term]; 1xDeamidated [N]; 1xPhospho [S/T/Y]		1	6	PBANKA_101620	protein kinase, putative	PBANKA_101620 [515-538]	0	2991.31	S11(Phospho): 45.08; T15(Phospho): 45.08	64.4		82.9	94.3	142.8	90.9	130.3	194.5	3.1		4	4.6	6.9	4.4	6.3	9.4	1.7		2.6	3.2	6.9	3.8	6.1	7.3	1		1	1	1	1	1	1	1.78647	High	7.88944	0.003423	0.02793	30.59	7.88944
[K].KNNEVEEIYSDNF.[-]	2xTMT6plex [N-Term; K1]; 1xPhospho [S10(91.6)]	PBANKA_145870 1xPhospho [S498(93)]	1	8	PBANKA_145870	conserved Plasmodium protein, unknown function	PBANKA_145870 [489-501]	1	2139	S10(Phospho): 91.57	87.4	115.9	75.9	95.6	110	97.7	103.3	114.3	34.2	45.4	29.7	37.4	43.1	38.3	40.5	44.8	18.7	27.7	19.3	26.3	43.1	33.1	39.2	34.8	3	3	3	3	3	3	3	3	2.18542	High	-0.693245	0.0005032	0.002483	27.39	-0.144806
[K].DNNNNNSNNNNNDEIEK.[N]	2xTMT6plex [N-Term; K17]; 2xDeamidated [N]		1	2	PBANKA_122840	mannose-6-phosphate isomerase, putative	PBANKA_122840 [63-79]	0	2436.09		76.9	106.1	81.6	99	92.9	96.7	115.8	131.1	22.3	30.8	23.7	28.8	27	28.1	33.7	38.1	12.2	18.8	15.4	20.2	27	24.3	32.6	29.6	1	1	1	1	1	1	1	1	1.82111	High	5.79638	0.009158	0.07963
[K].NDSYQTNHSK.[S]	2xTMT6plex [N-Term; K10]; 1xPhospho [T/S/Y]	PBANKA_141900 1xPhospho [S843(100)]	1	2	PBANKA_141900	conserved Plasmodium protein, unknown function	PBANKA_141900 [835-844]	0	1731.81		39	99.9	120.8	107.3	123.4	100.4	141.5	67.6	5.1	13.1	15.9	14.1	16.2	13.2	18.6	8.9	2.8	8	10.3	9.9	16.2	11.4	18	6.9	1	1	1	1	1	1	1	1	2.28113	High	0.873632	0.001311	0.01016	25.08	0.873632
[K].YSESFNEK.[A]	2xTMT6plex [N-Term; K8]; 1xPhospho [S/Y]	PBANKA_123710 1xPhospho [S2143(100)]	1	1	PBANKA_123710	conserved Plasmodium protein, unknown function	PBANKA_123710 [2140-2147]	0	1541.73		80.6	103.6	88.5	115.3	98.7	104.3	101.7	107.4	95.8	123.2	105.2	137.1	117.3	124	120.9	127.7	52.3	75.1	68.3	96.3	117.3	107.2	117.1	99.2	1	1	1	1	1	1	1	1	2.71001	High	0.644923	0.002475	0.02057	13.03	0.644923
[K].EGSASRDEVK.[K]	2xTMT6plex [N-Term; K10]; 1xPhospho [S]	PBANKA_132150 1xPhospho [S414(89.2)]	1	1	PBANKA_132150	conserved Plasmodium protein, unknown function	PBANKA_132150 [410-419]	1	1615.81	S5(Phospho): 89.17	97.7	119.5	91.4	125.4	109.1	116	117	23.8	202.2	247.2	189	259.4	225.8	240.1	242.1	49.2	110.4	150.7	122.7	182.2	225.8	207.6	234.5	38.2	1	1	1	1	1	1	1	1	2.1123	High	0.19635	0.00871	0.0755
[K].GNNSDNAGTSGNGFNMTTPTSYQISNNSSENDSK.[N]	2xTMT6plex [N-Term; K34]; 3xDeamidated [N/Q]; 1xOxidation [M16]		1	5	PBANKA_141440	exportin-1, putative	PBANKA_141440 [872-905]	0	3987.73		56.4	105.5	100.4	98	111.4	112.1	92.6	123.6	6.2	11.6	11.1	10.8	12.3	12.4	10.2	13.6	3.4	7.1	7.2	7.6	12.3	10.7	9.9	10.6	1	1	1	1	1	1	1	1	2.75142	High	4.78991	0	9.46e-05	29.49	4.78991
[K].ENNITNISNIEQK.[E]	2xTMT6plex [N-Term; K13]; 1xPhospho [T/S]; 1xDeamidated [N9]	PBANKA_132160 1xPhospho [S2656(85.4)]	1	1	PBANKA_132160	conserved Plasmodium protein, unknown function	PBANKA_132160 [2649-2661]	0	2056.04		87.1	59.4	59.3	130.5	115.4	120.4	104	123.9	7.7	5.2	5.2	11.5	10.2	10.6	9.2	10.9	4.2	3.2	3.4	8.1	10.2	9.2	8.9	8.5	1	1	1	1	1	1	1	1	2.04413	High	9.77847	0.003423	0.02782	21.17	9.77847
[K].DIEMDETEEDRNSNTEK.[G]	2xTMT6plex [N-Term; K17]; 1xOxidation [M4]; 1xPhospho [T15(90.2)]	PBANKA_060160 1xPhospho [S1467(96.2)]	1	18	PBANKA_060160	conserved protein, unknown function	PBANKA_060160 [1455-1471]	1	2609.13	S13(Phospho): 97.21	88.6	103.6	97	136.6	96.3	96.8	113.1	68	417.4	488	456.7	643.5	453.5	456	532.7	320.3	227.9	297.5	296.5	451.9	453.5	394.3	515.9	248.8	6	6	6	6	6	6	6	6	4.74293	High	0.419141	5.957e-05	0.0003873	30.33	0.881845
[K].HAFIHTYQPDKIYSDNSELSEQDQIE.[-]	2xTMT6plex [N-Term; K11]; 2xPhospho [S/T/Y]		1	10	PBANKA_094230	radial spoke head protein, putative	PBANKA_094230 [544-569]	1	3725.68		79.6	108.2	75.2	92.1	102.6	122.4	97.2	122.5	31.1	42.3	29.4	36	40.1	47.9	38	47.9	17	25.8	19.1	25.3	40.1	41.4	36.8	37.2	3	3	3	3	3	3	3	3	3.54814	High	-4.08801	0.0005936	0.002649	21.84	-4.8216
[R].TQSSTMYDNDENK.[N]	2xTMT6plex [N-Term; K13]; 1xOxidation [M6]; 1xPhospho [S3(99.6)]	PBANKA_031160 1xPhospho [S751(97.4)]	1	14	PBANKA_031160	conserved Plasmodium protein, unknown function	PBANKA_031160 [749-761]	0	2086.9	S3(Phospho): 99.58	102.9	127.7	107.6	144.6	87.2	74.3	87.8	67.9	109.7	136.2	114.7	154.2	93	79.2	93.7	72.4	59.9	83	74.5	108.3	93	68.5	90.7	56.2	3	3	3	3	3	3	3	3	4.11814	High	1.50833	5.957e-05	0.000369	46.73	1.50833
[R].EIDEDQNDESEEKDEGDDDGYDDEGEEQTGK.[E]	3xTMT6plex [N-Term; K13; K31]; 1xDeamidated [Q/N]; 1xPhospho [S/Y/T]		1	9	PBANKA_132020	conserved Plasmodium protein, unknown function	PBANKA_132020 [1336-1366]	1	4302.75	S10(Phospho): 49.32; Y21(Phospho): 49.32	87.3	84.8	93.1	149.2	85.3	90.1	97.8	112.4	13	12.6	13.9	22.2	12.7	13.4	14.6	16.7	7.1	7.7	9	15.6	12.7	11.6	14.1	13	1	1	1	1	1	1	1	1	2.05804	High	5.10159	0.00224	0.01744	35.24	5.10159
[M].AAIDHNVQDELVDYEDDDNMLDNK.[D]	1xTMT6plex [K24]; 1xAcetyl [N-Term]; 2xDeamidated [N19; N23]; 1xOxidation [M20]	PBANKA_030680 1xAcetyl [N-Term]	1	1	PBANKA_030680	ATP-dependent RNA helicase UAP56, putative (UAP56)	PBANKA_030680 [2-25]	0	3080.34		87.4	84.4	80.4	132.7	109.6	84.5	127.8	93.1	11.7	11.3	10.8	17.8	14.7	11.3	17.1	12.5	6.4	6.9	7	12.5	14.7	9.8	16.6	9.7	1	1	1	1	1	1	1	1						29.3	11.8992
[K].VEPQIDETKQGETEQDDTESNATAVK.[E]	3xTMT6plex [N-Term; K9; K26]; 2xPhospho [T13(99.6); T18(91.5)]	PBANKA_040110 2xPhospho [T280(99.6); T285(91.5)]	1	2	PBANKA_040110	serine/threonine protein kinase, putative (SRPK1)	PBANKA_040110 [268-293]	1	3709.73	T13(Phospho): 99.63; T18(Phospho): 91.51	91.2	93.6	59.1	101.2	109.9	139.7	104.4	100.8	17.6	18	11.4	19.5	21.2	26.9	20.1	19.4	9.6	11	7.4	13.7	21.2	23.3	19.5	15.1	1	1	1	1	1	1	1	1	4.22193	High	2.04495	0	1.045e-05	45.86	2.04495
[truncated: 9,596 more rows]
[truncated: 2 more columns]
