# Supplementary material for: Multiple short windows of calcium-dependent protein kinase 4 activity coordinate distinct cell cycle events during Plasmodium gametogenesis
Source: eLife. 2017 May 8;6:e26524. doi: 10.7554/eLife.26524 (PMC5457135; doi:10.7554/eLife.26524)
Supplement: Supplementary file 4. — DOI: http://dx.doi.org/10.7554/eLife.26524.017 [file elife-26524-supp4.xlsx]

## Sheet: Sheet1
Name	Background	Aim	Exflagellation at 20 min	DNA replication at 10 min	Mitotic spindle at 10 min	Axoneme at 10 min	Asexual growth
CDPK4S147M-3xHA	2.34	Test for off target effects of 1294	Blocked				Sligthly reduced
CDPK4S147M	2.34	Test for off target effects of 1294	Normal				Normal
CDPK4S147G	2.34	Analog-senstive kinase to identify CDPK4 substrates	Sligthly reduced				Normal
CDPK4-KO	2.34	Role of CDPK4, phosphoproteome	Blocked	Mainly blocked at 1N	Strongly reduced	Strongly reduced	Sligthly reduced
CDPK4-2xmyc	CDPK4-KO	Co-immunoprecipitation, localisation	Normal	Normal	Normal	Normal	Normal
CDPK4G2A-2xmyc	CDPK4-KO	Co-immunoprecipitation, localisation, role of myristoylation	Blocked	Mainly blocked at 1N	Normal	Strongly reduced
CDPK4M57A-2xmyc	CDPK4-KO	Role of non myristoylated short isoform	Strongly reduced	Normal		Normal
SOC1-KO	820cl1	Role of SOC1	Strongly reduced	Partially blocked at 1N			Sligthly reduced
SOC2-KO	820cl1	Role of SOC2	Strongly reduced	Mainly blocked at 2N	Strongly reduced	Normal	Reduced
SOC3-KO	820cl1	Role of SOC3	Blocked	Normal		Normal	Normal
SOC4-KO	820cl1	Role of SOC4	Normal
SOC5-KO	820cl1	Role of SOC5	Normal
SOC6-KO	820cl1	Role of SOC6	Normal
CDPK4-3xHA	2.34	Co-immunoprecipitation, localisation	Delayed
MCM5-3xHA	2.34	Co-immunoprecipitation	Normal
SOC1-3xHA	820cl1	Co-immunoprecipitation, localisation	Normal
SOC2-3xHA	820cl1	Immunoprecipitation, localisation	Normal
SOC3-3xHA	820cl1	Localisation	Normal
