# Supplementary material for: Multiple short windows of calcium-dependent protein kinase 4 activity coordinate distinct cell cycle events during Plasmodium gametogenesis
Source: eLife. 2017 May 8;6:e26524. doi: 10.7554/eLife.26524 (PMC5457135; doi:10.7554/eLife.26524)
Supplement: Supplementary file 5. — DOI: http://dx.doi.org/10.7554/eLife.26524.018 [file elife-26524-supp5.xlsx]

## Sheet: Table S4
Primer name	Primer sequence 5'-3'
cdpk4 del147-F	TAATGAAATTATATGAATTTTTTGAAGATAATAATTATTATTATTTAGTGAAGGCGCATAACGATACCAC
cdpk4 del147-R	CGTTTCCTACTAATAATTTCATCAAATAATTCACCTCCAGAATATACATCCCGCCTACTGCGACTATAGA
cdpk4 S147M mut-F	TAATGAAATTATATGAATTTTTTGAAGATAATAATTATTATTATTTAGTGATGGATGTATATTCTGGAG
cdpk4 S147G mut-F	TAATGAAATTATATGAATTTTTTGAAGATAATAATTATTATTATTTAGTGGGGGATGTATATTCTGGAG
cdpk4 S147 mut-R	TTTTCAGGTTTTAAATCTCTATGAACT
cdpk4 gk-F	CAGGTCATGAATATGCAATTAAAGTAA
cdpk4 gk-R	GACACCACATGACCATATATCACA
cdpk4 HA-F	AAATTGATTTTAAAGAATTTAGAGACATGTTAATAAAACTATGTAACTATAAGGCGCATAACGATACCAC
cdpk4 HA-R	AGTATTATACTCATACATATATAACTATATGTATTTACCCTGTCATACATCCGCCTACTGCGACTATAGA
cdpk4 QCR1	TGCAGCTATTGAAGTTGAAGTCGA
cdpk4 QCR2	TGTTCGTAAGGGAGCCAAACA
cdpk4 QCR3	CACATTTATGCTTCCAAAAAGGA
cdpk4 KO-F	TTATGTAAAAAAACATTATAAATACATATATACCTATATATATAATAAAAGTAATTCGTGCGCGTCAGCCTCTTACCCGCCGCCTACTGCGACTATAGA
cdpk4 KO-R	AGTATTATACTCATACATATATAACTATATGTATTTACCCTGTCATACATAAGGCGCATAACGATACCAC
GW1	CATACTAGCCATTTTATGTG
GW2	CTTTGGTGACAGATACTAC
cdpk4 WT-F	TACCTATATATATAATAAAAGCTAGCATGGGGCAAGAAATGTCTAC
cdpk4 WT-R	GTGTAAAACATCCGGAGCAATATAATAGGCAGT
cdpk4 G2A-F	TACCTATATATATAATAAAAGCTAGCATGCAGCAAGAAATGTCTAC
cdpk4 G2A-R	GTGTAAAACATCCGGAGCAATATAATAGGCAGT
cdpk4 M57A 1F	TACCTATATATATAATAAAAGCTAGCATGGGGCAAGAAATGTCTAC
cdpk4 M57A 1R	CATTACTATTTTGTATGAATGCACCAGG
cdpk4 M57A 2F	ATTCATACAAAATAGTAATGTAGTATTTAATGAGCAATATAAAG
cdpk4 M57A 2R	ATAAGTTCCGTGTAAAACATCCGGAGCAATATAATAGGCAGTGC
cdpk4 seq1F	CACATTTATGCTTCCAAAAAGGA
cdpk4 seq1R	CAAAATGGGTTGATAATCCAAAA
cdpk4 seq2F	GAAACGATTTTATGAAGTAGATGCAG
cdpk4 seq2R	AGTGCGGCTTGTGCTAACTT
cdpk4 seq3F	TGACAAAGCGAAAGACTTGA
cdpk4 seq3R	TGGGTTATTCAAGATGAAACTGG
cdpk4 seq4F	TTCAGAATTTTTAACAGTTGCTATTGA
mcm5 HA-F	TTAAAAAGGGAGAGCTTCAAGAAAGAGGAGATCGCTCTGTTAGAAGGTGTAAGGCGCATAACGATACCAC
mcm5 HA-R	AAAAACGTACATGGTGATATATTTTTATAAAATAAAACGATATTACTTGGCCGCCTACTGCGACTATAGA
mcm5 HA-QCR1	TGTGCACGCAACATACATTCT
mcm5 HA-QCR2	TGGGGCCAAAATGGGGAAGT
soc1 KO-F	TGTAAATATTTTTTTTGTTTATTTATAATTTAAATTCAATGAATAACAACGTAATTCGTGCGCGTCAGCGTTCGGATTTCCGCCTACTGCGACTATAGA
soc1 KO-R	TATGGTATTTTAACAAATAACAATACTTTAAATAATTCAGTTATATTTCTAAGGCGCATAACGATACCAC
soc1 HA-F	ACAATAAAAATAATTATTTGTATGAAGATAACGCAAATGAACAAAATAATAAGGCGCATAACGATACCAC
soc1 HA-R	TAATAAATATAAATTGTCTAAAAATGTTAAAAAAAAATAAAGAATTAATACCGCCTACTGCGACTATAGA
soc1 HA-QCR1	ATTCATCCCCAAAACGTTCA
soc1 HA-QCR2	AAGGTGCAATGAAAGCTACG
soc1 KO-QCR1	GCACACCGACTAAAATATCCCGCCA
soc1 KO-QCR2	TTTATGCGCCGACATATGCA
soc1 KO-QCR3	CGGCTGAAACTGTGTATGGA
soc2 KO-F	GCACACCGACTAAAATATCCCGCCA
soc2 KO-R	TTTATGCGCCGACATATGCA
soc2 HA-F	TAAATATATGTAAGGAGATTAACAATCAGCAAAATATGCTAGAGGATGATAAGGCGCATAACGATACCAC
soc2 HA-R	TCATACTTTCGATGCACCTGTAATATAATATATGTAAACACTCTTAAATACCGCCTACTGCGACTATAGA
soc2 HA-QCR1	TCGGCGAAATCGTTAAAAGGCA
soc2 HA-QCR2	TGGGGAATTTTTGTGTGTGTCCT
soc2 KO-QCR1	ACGTTTGGGCATTTCAAAAGCAAGCA
soc2 KO-QCR2	AGCAGTCAATGAAATAAGCAATGGT
soc2 KO-QCR3	TTTGGAGATATTTTGAAAAGCTGA
soc3 KO-F	CATATTTATATTAATTGAATAAAATGAATAAAAAATATAATTAAAATTAAAAGGCGCATAACGATACCAC
soc3 KO-R	GAATATGTATGGGTCATATTCATACCTTGTAGGATCTGCTAATATTTCCAGTAATTCGTGCGCGTCAGCAACTCGGATGCCGCCTACTGCGACTATAGA
soc3 HA-F	TTTTTTCTATCAACTTAATAGAATCGAAAATAATAACAAAAAATCCCCATAAGGCGCATAACGATACCAC
soc3 HA-R	TTAATTTTGTTTGATTCTTTTTCTAATCTATTTGAGATTTTCACATTTCACCGCCTACTGCGACTATAGA
soc3 HA-QCR1	TGCAGAGTTAATGATGCTCAAGA
soc3 HA-QCR2	TGAATTGAACGCAAACTACCCA
soc3 KO-QCR1	TGTGCGTATAACAGTGGATCGACGC
soc3 KO-QCR2	TCCAAAGACTGCAACAATGA
soc3 KO-QCR3	TCAAGTGTGCAAAACATGGAA
soc4 KO-F	ATGCAATGATAATTTTATGTTTGAATATTTTGTTGTTGTCAAATATTTTTGTAATTCGTGCGCGTCAGCAAGGTACTCCCCGCCTACTGCGACTATAGA
soc4 KO-R	AATATAAATTACCTTATTATTCAGCAAGGGGTTTAGAAATGGATAAAATTAAGGCGCATAACGATACCAC
soc4 QCR1	TGCGAGGTTATCAAGGCGTGA
soc4 QCR2	TGTTGATGAAGGAACGGAAA
soc4 QCR3	ATTACTAGGTACATGGCTCG
soc5 KO-F	TTAGTATTAATACCTATATATATTTCCAATTTATTTATAATTTGTTTAAAAAGGCGCATAACGATACCAC
soc5 KO-R	TGTACAACATAAGAACAAAAAGTAAAATAAATCATTAAACACATACCCTCGTAATTCGTGCGCGTCAGTAGAAGTGTGACCGCCTACTGCGACTATAGA
soc5 QCR1	AGTCGAGGGTACAGTAACGATCCA
soc5 QCR2	TGCAAGCAAAGTTCACATATGCCCA
soc5 QCR3	GGTTCTATAGCGTGGAGTTA
soc6 KO-F	CGTTACATCAAACAAATTAGCGCTTTAAATAAAATAGAAAACAAGACAAACCGCCTACTGCGACTATAGA
soc6 KO-R	CATTTAATAATTTTATTTTGGCTAGTTTGGTCATGTAATTTCCTTCATTTAAGGCGCATAACGATACCAC
soc6 QCR1	TCGAGGAGATATCGATTTTTCCGT
soc6 QCR2	ACGTGACCCTTTGGATTAACCCA
soc6 QCR3	TCCTTAATTGATGAGTCGCT
